# Supplementary material
Source: publisher figshare collection journal article supplement (https://acs.figshare.com/ndownloader/files/7817506)
Supplement: Supplementary file 1 [file 7817506]

data_General

# SUBMISSION DETAILS

_publ_contact_author_name             'Shiro Hikichi'
_publ_contact_author_email            'hikichi@kanagawa-u.ac.jp'
_publ_contact_author_fax              '+81-45-413-9770'
_publ_contact_author_phone            '+81-45-481-5661(ext.3890)'
_publ_contact_author_address
;
  Departmet of Material and Life Chemistry, Faculty of Engineering,
 Kanagawa University
  3-27-1 Rokkakubashi, Kanagawa-ku, Yokohama-city, 222-8686, JAPAN
;


loop_
_publ_author_name
_publ_author_footnote
_publ_author_address
' Ayaka Nakamizu '
;
  Departmet of Material and Life Chemistry, Faculty of Engineering,
 Kanagawa University
;
;
  3-27-1 Rokkakubashi, Kanagawa-ku, Yokohama-city, 222-8686, JAPAN
;
' Takeshi Kasai '
;
  Departmet of Material and Life Chemistry, Faculty of Engineering,
 Kanagawa University
;
;
  3-27-1 Rokkakubashi, Kanagawa-ku, Yokohama-city, 222-8686, JAPAN
;
' Jun Nakazawa '
;
  Departmet of Material and Life Chemistry, Faculty of Engineering,
 Kanagawa University
;
;
  3-27-1 Rokkakubashi, Kanagawa-ku, Yokohama-city, 222-8686, JAPAN
;
' Shiro Hikichi '
;
  Departmet of Material and Life Chemistry, Faculty of Engineering,
 Kanagawa University
;
;
  3-27-1 Rokkakubashi, Kanagawa-ku, Yokohama-city, 222-8686, JAPAN
;

_publ_requested_journal          'Inorganic Chemistry (ACS)'
_publ_section_title            
; Immobilization of a Boron Center-functionalized Scorpionate Ligand
 on Mesoporous Silica Supports for Heterogeneous Tp-based Catalysts
;
_publ_section_abstract
;
 Abstruct
;

_publ_section_comment
;
 Comment...
;

_publ_section_references
;
References...
;


# start Validation Reply Form
_vrf_PLAT213_1
;
PROBLEM: Atom F17             has ADP max/min Ratio .....        5.4 prolat
RESPONSE: Due to the rotation of the CF3 group, treatment of the locations
 and thermal ellipsoids of disorderd F17-F19 atoms were difficult.
;
_vrf_PLAT242_1
;
PROBLEM: Low    'MainMol' Ueq as Compared to Neighbors of         C9 Check 
RESPONSE: The U values of the F atoms attached on C9 are large Due to 
the rotation of the CF3 group. 
;
_vrf_PLAT911_1
;
PROBLEM: Missing # FCF Refl Between THmin & STh/L=  0.600         36 Report
RESPONSE: The reflections were not collected due to low quality of the crystal.
;
_vrf_PLAT913_1
;
PROBLEM: Missing # of Very Strong Reflections in FCF ....          4 Note  
RESPONSE: Some of the strong reflections in the shadow of direct beam stopper
were not collected. Because of low quality of the crystal, long exposuire time for 
low intensity peaks caused scale out of some strong peaks.
;
_vrf_PLAT906_2
;
PROBLEM: Large K value in the Analysis of Variance ......      5.782 Check 
RESPONSE: The problem may caused by low quality of the crystal. 
;
_vrf_PLAT911_2
;
PROBLEM: Missing # FCF Refl Between THmin & STh/L=  0.600         49 Report
RESPONSE: The problem may caused by low quality of the crystal. 
;
_vrf_PLAT913_2
;
PROBLEM: Missing # of Very Strong Reflections in FCF ....          7 Note  
RESPONSE:  Some of the strong reflections in the shadow of direct beam stopper
were not collected. Because of low quality of the crystal, long exposuire time for 
low intensity peaks caused scale out of some strong peaks.
;
# end Validation Reply Form 
 
 
 
data_1
 
_audit_creation_method            'SHELXL-2014/7'
_shelx_SHELXL_version_number      '2014/7'
_chemical_name_systematic         
;
[{allyltris(3-trifluoromethylpyrazol-1-yl)borato}(bromido)
cobalt(II)]
;
_chemical_name_common             '[(Allyl-B(3-CF3Pz)3)Br Co]'
_chemical_melting_point           ?
_chemical_formula_moiety           'C15 H11 B Br Co F9 N6' 
_chemical_formula_sum
 'C15 H11 B Br Co F9 N6' 
_chemical_formula_weight          595.95

loop_
 _atom_type_symbol
 _atom_type_description
 _atom_type_scat_dispersion_real
 _atom_type_scat_dispersion_imag
 _atom_type_scat_source
 'C'  'C'   0.0033   0.0016
 'International Tables Vol C Tables 4.2.6.8 and 6.1.1.4'
 'H'  'H'   0.0000   0.0000
 'International Tables Vol C Tables 4.2.6.8 and 6.1.1.4'
 'N'  'N'   0.0061   0.0033
 'International Tables Vol C Tables 4.2.6.8 and 6.1.1.4'
 'F'  'F'   0.0171   0.0103
 'International Tables Vol C Tables 4.2.6.8 and 6.1.1.4'
 'Co'  'Co'   0.3494   0.9721
 'International Tables Vol C Tables 4.2.6.8 and 6.1.1.4'
 'Br'  'Br'  -0.2901   2.4595
 'International Tables Vol C Tables 4.2.6.8 and 6.1.1.4'
 'B'  'B'   0.0013   0.0007
 'International Tables Vol C Tables 4.2.6.8 and 6.1.1.4'
 
_space_group_crystal_system       monoclinic
_space_group_IT_number            14
_space_group_name_H-M_alt         'P 21/n'
_space_group_name_Hall            '-P 2yn'
 
_shelx_space_group_comment
;
The symmetry employed for this shelxl refinement is uniquely defined
by the following loop, which should always be used as a source of
symmetry information in preference to the above space-group names.
They are only intended as comments.
;
 
loop_
 _space_group_symop_operation_xyz
 'x, y, z'
 '-x+1/2, y+1/2, -z+1/2'
 '-x, -y, -z'
 'x-1/2, -y-1/2, z-1/2'
 
_cell_length_a                    8.5753(5)
_cell_length_b                    15.3150(9)
_cell_length_c                    15.7479(9)
_cell_angle_alpha                 90
_cell_angle_beta                  94.460(3)
_cell_angle_gamma                 90
_cell_volume                      2061.9(2)
_cell_formula_units_Z             4
_cell_measurement_temperature     113(2)
_cell_measurement_reflns_used           4547
_cell_measurement_theta_min             1.8576
_cell_measurement_theta_max             27.4770
 
_exptl_crystal_description              'Platelet'
_exptl_crystal_colour                   'Blue'
_chemical_formula_analytical            '?'
_exptl_absorpt_correction_type          'Numerical'
_exptl_absorpt_correction_T_max         0.8544
_exptl_absorpt_correction_T_min         0.4946
_exptl_special_details
;
 ?
;

_exptl_crystal_size_max           0.30
_exptl_crystal_size_mid           0.15
_exptl_crystal_size_min           0.05
_exptl_crystal_density_meas       ?
_exptl_crystal_density_diffrn     1.920
_exptl_crystal_density_method     'not measured'
_exptl_crystal_F_000              1164
_exptl_absorpt_coefficient_mu     2.867
_exptl_absorpt_process_details    
;Numerical (Based on real shape of the crystal) absorption
correction was parformed on CrystalClear (Rigaku Inc., 2007)
with FS_ABSCOR method.
;   

 

_diffrn_radiation_type            MoK\a

_diffrn_radiation_monochromator   graphite
_diffrn_measurement_device_type   ?
_diffrn_standards_number          ?
_diffrn_standards_interval_count  ?
_diffrn_standards_interval_time   ?
_diffrn_standards_decay_%         ?
_diffrn_reflns_av_sigmaI/netI     0.1802
_diffrn_reflns_limit_h_min        -11
_diffrn_reflns_limit_h_max        10
_diffrn_reflns_limit_k_min        0
_diffrn_reflns_limit_k_max        19
_diffrn_reflns_limit_l_min        0
_diffrn_reflns_limit_l_max        20
_reflns_number_total              4652
_reflns_number_gt                 4186
_reflns_threshold_expression      >2\s(I)
 

_diffrn_special_details
;
 ?
;
_diffrn_source_power                    3.0000
_diffrn_source_voltage                  50.0000
_diffrn_source_current                  60.0000
_diffrn_radiation_wavelength            0.710747
_diffrn_radiation_source                'Rotating Anode'
_diffrn_radiation_detector              'CCD'
_diffrn_measurement_device
;
Saturn70 (4x4 bin mode)
;
_diffrn_detector_area_resol_mean        28.5714
_diffrn_measurement_method              \w
_diffrn_reflns_number                   4831
_diffrn_number_total                    4831
_diffrn_reflns_av_R_equivalents         0.0240
_diffrn_reflns_av_sigmaI/detI           0.0495
_diffrn_reflns_theta_min                1.8576
_diffrn_reflns_theta_max                27.4770
_diffrn_reflns_reduction_process        'Lp corrections applied'
_diffrn_measurement_details
;
scan:
	Number of images: 600
	           Slice: -115.0000 - 65.0000
	     Image width: 0.3000
	        Exp time: 15.0000
	   Rotation axis: Omega
	           Omega: 0.0000
	             Chi: 45.0000
	             Phi: 0.0000
	             XTD: 54.8515
	          2theta: -25.1870
scan:
	Number of images: 600
	           Slice: -115.0000 - 65.0000
	     Image width: 0.3000
	        Exp time: 15.0000
	   Rotation axis: Omega
	           Omega: 0.0000
	             Chi: 45.0000
	             Phi: 90.0000
	             XTD: 54.8515
	          2theta: -25.1870
scan:
	Number of images: 600
	           Slice: -115.0000 - 65.0000
	     Image width: 0.3000
	        Exp time: 15.0000
	   Rotation axis: Omega
	           Omega: 0.0000
	             Chi: 45.0000
	             Phi: 180.0000
	             XTD: 54.8515
	          2theta: -25.1870

;
_diffrn_measurement_device_details
;
AFC10: Fixed Chi 2 circle
;
_diffrn_orient_matrix_UB_11             -0.1138
_diffrn_orient_matrix_UB_12             0.0214
_diffrn_orient_matrix_UB_13             -0.0166
_diffrn_orient_matrix_UB_21             -0.0058
_diffrn_orient_matrix_UB_22             -0.0562
_diffrn_orient_matrix_UB_23             -0.0327
_diffrn_orient_matrix_UB_31             -0.0184
_diffrn_orient_matrix_UB_32             -0.0292
_diffrn_orient_matrix_UB_33             0.0535
_diffrn_orient_matrix_type              'd*Trek'


 

 


_exptl_transmission_factor_min    ?
_exptl_transmission_factor_max    ?
_shelx_estimated_absorpt_T_min    0.480
_shelx_estimated_absorpt_T_max    0.870
_exptl_absorpt_special_details    ?
_diffrn_ambient_temperature       113(2)
_diffrn_source                    ?


_diffrn_reflns_theta_full         27.489
_diffrn_measured_fraction_theta_max   0.983
_diffrn_measured_fraction_theta_full  0.983
_diffrn_reflns_Laue_measured_fraction_max    0.983
_diffrn_reflns_Laue_measured_fraction_full   0.983
_diffrn_reflns_point_group_measured_fraction_max   0.983
_diffrn_reflns_point_group_measured_fraction_full  0.983

_reflns_Friedel_coverage          0.000
_reflns_Friedel_fraction_max      .
_reflns_Friedel_fraction_full     .
 
_reflns_special_details
;
 Reflections were merged by SHELXL according to the crystal
 class for the calculation of statistics and refinement.
 
 _reflns_Friedel_fraction is defined as the number of unique
 Friedel pairs measured divided by the number that would be
 possible theoretically, ignoring centric projections and
 systematic absences.
;
_computing_data_collection              'CrystalClear (Rigaku Inc., 2007)'
_computing_cell_refinement              'CrystalClear (Rigaku Inc., 2007)'
_computing_data_reduction
                     'CrystalClear (Rigaku Inc., 2007), SORTAV (Blessing, 1995)'
_computing_structure_solution           'SIR92 (Giacovazzo et al, 1993)'
_computing_molecular_graphics           'Ortep-3 for Windows (Farrugia, 1997)'
_computing_publication_material
 'WinGX publication routines (Farrugia, 1999)' 

_computing_structure_refinement 'SHELXL-2014/7 (Sheldrick, 2014)'

_refine_special_details           ?
_refine_ls_structure_factor_coef  Fsqd
_refine_ls_matrix_type            full
_refine_ls_weighting_scheme       calc
_refine_ls_weighting_details
'w=1/[\s^2^(Fo^2^)+(0.0097P)^2^+0.7864P] where P=(Fo^2^+2Fc^2^)/3'
_atom_sites_solution_primary      ?
_atom_sites_solution_secondary    ?
_atom_sites_solution_hydrogens    geom
_refine_ls_hydrogen_treatment     constr
_refine_ls_extinction_method      none
_refine_ls_extinction_coef        .
_refine_ls_number_reflns          4652
_refine_ls_number_parameters      325
_refine_ls_number_restraints      0
_refine_ls_R_factor_all           0.0402
_refine_ls_R_factor_gt            0.0376
_refine_ls_wR_factor_ref          0.0771
_refine_ls_wR_factor_gt           0.0734
_refine_ls_goodness_of_fit_ref    1.002
_refine_ls_restrained_S_all       1.002
_refine_ls_shift/su_max           0.002
_refine_ls_shift/su_mean          0.000
 
loop_
 _atom_site_label
 _atom_site_type_symbol
 _atom_site_fract_x
 _atom_site_fract_y
 _atom_site_fract_z
 _atom_site_U_iso_or_equiv
 _atom_site_adp_type
 _atom_site_occupancy
 _atom_site_site_symmetry_order  
 _atom_site_calc_flag
 _atom_site_refinement_flags_posn
 _atom_site_refinement_flags_adp
 _atom_site_refinement_flags_occupancy
 _atom_site_disorder_assembly
 _atom_site_disorder_group
Br1 Br 0.74626(4) 0.14592(2) 0.59554(2) 0.02785(10) Uani 1 1 d . . . . .
Co1 Co 0.70041(4) 0.22643(2) 0.71598(2) 0.01509(10) Uani 1 1 d . . . . .
F5 F 0.4147(2) 0.28059(12) 0.54311(12) 0.0347(4) Uani 1 1 d . . . . .
F4 F 0.6143(3) 0.35773(14) 0.51687(12) 0.0384(5) Uani 1 1 d . . . . .
F1 F 1.0968(2) 0.27684(12) 0.65582(10) 0.0299(4) Uani 1 1 d . . . . .
F2 F 1.0981(2) 0.15973(11) 0.73098(12) 0.0308(4) Uani 1 1 d . . . . .
F3 F 1.2770(2) 0.25686(13) 0.75601(13) 0.0344(4) Uani 1 1 d . . . . .
F6 F 0.3860(3) 0.41534(14) 0.50689(12) 0.0435(5) Uani 1 1 d . . . . .
N4 N 0.5656(3) 0.38292(14) 0.77847(14) 0.0164(4) Uani 1 1 d . . . . .
N2 N 0.8229(3) 0.33550(13) 0.85359(13) 0.0153(4) Uani 1 1 d . . . . .
F7 F 0.4155(6) -0.0099(3) 0.7937(5) 0.072(2) Uani 0.7 1 d . . P A 1
N5 N 0.6044(3) 0.18489(14) 0.82372(13) 0.0153(4) Uani 1 1 d . . . . .
C6 C 0.4959(3) 0.38812(17) 0.64361(17) 0.0190(5) Uani 1 1 d . . . . .
N1 N 0.8736(3) 0.28677(14) 0.78831(13) 0.0148(4) Uani 1 1 d . . . . .
N3 N 0.5715(3) 0.33815(14) 0.70419(13) 0.0152(4) Uani 1 1 d . . . . .
N6 N 0.5746(3) 0.25247(13) 0.87743(13) 0.0151(4) Uani 1 1 d . . . . .
C13 C 0.6076(3) 0.41082(17) 0.94116(17) 0.0180(5) Uani 1 1 d . . . . .
H13A H 0.6424 0.4700 0.9259 0.022 Uiso 1 1 calc R U . . .
H13B H 0.4927 0.4133 0.9439 0.022 Uiso 1 1 calc R U . . .
C11 C 0.4641(4) 0.13450(19) 0.92898(19) 0.0233(6) Uani 1 1 d . . . . .
H11 H 0.4082 0.0966 0.9634 0.028 Uiso 1 1 calc R U . . .
C2 C 1.0302(3) 0.29044(16) 0.79662(16) 0.0168(5) Uani 1 1 d . . . . .
C3 C 1.0815(3) 0.34050(18) 0.86649(17) 0.0208(6) Uani 1 1 d . . . . .
H3 H 1.1863 0.3535 0.8864 0.025 Uiso 1 1 calc R U . . .
C12 C 0.4902(3) 0.22286(18) 0.93985(18) 0.0213(6) Uani 1 1 d . . . . .
H12 H 0.4541 0.2574 0.9845 0.026 Uiso 1 1 calc R U . . .
C5 C 0.4792(4) 0.36002(19) 0.55287(19) 0.0248(6) Uani 1 1 d . . . . .
C10 C 0.5381(3) 0.11359(16) 0.85641(17) 0.0166(5) Uani 1 1 d . . . . .
C7 C 0.4413(4) 0.46365(19) 0.67853(18) 0.0259(6) Uani 1 1 d . . . . .
H7 H 0.3835 0.5093 0.6498 0.031 Uiso 1 1 calc R U . . .
C4 C 0.9466(3) 0.36730(18) 0.90074(17) 0.0191(5) Uani 1 1 d . . . . .
H4 H 0.9420 0.4027 0.9500 0.023 Uiso 1 1 calc R U . . .
F8 F 0.6273(8) 0.0255(3) 0.7467(3) 0.070(2) Uani 0.7 1 d . . P A 1
C1 C 1.1256(3) 0.24613(17) 0.73479(17) 0.0190(5) Uani 1 1 d . . . . .
F9 F 0.6265(8) -0.0302(3) 0.8682(3) 0.0693(18) Uani 0.7 1 d . . P A 1
C14 C 0.6795(4) 0.39024(18) 1.02896(17) 0.0223(6) Uani 1 1 d . . . . .
H14 H 0.6581 0.3346 1.0520 0.027 Uiso 1 1 calc R U . . .
C9 C 0.5521(4) 0.02642(17) 0.81655(18) 0.0231(6) Uani 1 1 d . . . . .
C15 C 0.7697(4) 0.4434(2) 1.0763(2) 0.0281(6) Uani 1 1 d . . . . .
H15A H 0.7937 0.4996 1.0555 0.034 Uiso 1 1 calc R U . . .
H15B H 0.8108 0.4256 1.1314 0.034 Uiso 1 1 calc R U . . .
B1 B 0.6434(4) 0.34592(18) 0.86479(19) 0.0169(6) Uani 1 1 d . . . . .
C8 C 0.4882(4) 0.45872(18) 0.76347(18) 0.0229(6) Uani 1 1 d . . . . .
H8 H 0.4693 0.5016 0.8050 0.027 Uiso 1 1 calc R U . . .
F19 F 0.5226(18) -0.0335(5) 0.8733(7) 0.064(4) Uani 0.3 1 d . . P A 2
F17 F 0.4599(18) 0.0168(7) 0.7557(8) 0.075(5) Uani 0.3 1 d . . P A 2
F18 F 0.6874(11) 0.0137(7) 0.7959(11) 0.070(4) Uani 0.3 1 d . . P A 2
 
loop_
 _atom_site_aniso_label
 _atom_site_aniso_U_11
 _atom_site_aniso_U_22
 _atom_site_aniso_U_33
 _atom_site_aniso_U_23
 _atom_site_aniso_U_13
 _atom_site_aniso_U_12
Br1 0.0336(2) 0.02844(17) 0.02119(15) -0.00908(10) 0.00011(13) 0.00623(11)
Co1 0.0145(2) 0.01603(17) 0.01473(17) -0.00280(12) 0.00127(14) -0.00087(13)
F5 0.0399(12) 0.0321(9) 0.0312(9) -0.0063(8) -0.0026(8) -0.0099(8)
F4 0.0376(12) 0.0550(12) 0.0238(9) -0.0066(8) 0.0099(8) -0.0066(9)
F1 0.0383(11) 0.0352(9) 0.0173(8) -0.0009(7) 0.0093(7) 0.0078(8)
F2 0.0347(11) 0.0178(8) 0.0418(10) -0.0065(7) 0.0149(9) 0.0014(7)
F3 0.0131(9) 0.0497(11) 0.0408(11) -0.0147(9) 0.0043(8) -0.0017(8)
F6 0.0571(15) 0.0442(11) 0.0261(10) 0.0011(8) -0.0172(9) 0.0211(10)
N4 0.0165(12) 0.0170(10) 0.0159(10) -0.0018(8) 0.0024(8) 0.0021(8)
N2 0.0176(12) 0.0134(9) 0.0146(10) -0.0021(8) -0.0012(8) -0.0017(8)
F7 0.0270(19) 0.043(3) 0.146(6) -0.054(3) 0.003(3) -0.0139(19)
N5 0.0115(11) 0.0160(9) 0.0183(10) -0.0012(8) 0.0002(9) -0.0025(8)
C6 0.0204(15) 0.0189(12) 0.0175(12) -0.0004(10) 0.0011(11) 0.0017(10)
N1 0.0128(11) 0.0176(10) 0.0145(10) -0.0041(8) 0.0038(8) -0.0004(8)
N3 0.0155(12) 0.0182(10) 0.0119(9) -0.0029(8) 0.0012(8) -0.0006(8)
N6 0.0158(12) 0.0159(9) 0.0138(10) -0.0039(8) 0.0033(8) -0.0003(8)
C13 0.0198(15) 0.0147(11) 0.0199(12) -0.0040(9) 0.0043(11) -0.0017(10)
C11 0.0235(16) 0.0237(13) 0.0234(13) 0.0016(11) 0.0063(12) -0.0040(11)
C2 0.0166(14) 0.0152(11) 0.0189(12) 0.0001(9) 0.0025(10) -0.0010(9)
C3 0.0139(15) 0.0273(13) 0.0204(13) -0.0065(10) -0.0031(11) -0.0013(10)
C12 0.0221(15) 0.0220(12) 0.0206(12) -0.0017(10) 0.0070(11) -0.0027(11)
C5 0.0226(16) 0.0275(14) 0.0237(14) 0.0030(11) -0.0019(12) 0.0010(11)
C10 0.0141(13) 0.0155(11) 0.0205(12) 0.0008(9) 0.0026(10) -0.0016(9)
C7 0.0256(17) 0.0259(14) 0.0258(14) 0.0029(11) -0.0006(12) 0.0073(12)
C4 0.0189(15) 0.0230(12) 0.0150(12) -0.0038(10) -0.0009(11) -0.0043(10)
F8 0.124(6) 0.0322(19) 0.064(3) -0.022(2) 0.069(3) -0.028(3)
C1 0.0139(14) 0.0199(12) 0.0234(13) -0.0020(10) 0.0017(10) -0.0003(10)
F9 0.114(4) 0.034(2) 0.055(3) -0.0077(19) -0.032(3) 0.041(3)
C14 0.0262(16) 0.0206(12) 0.0201(13) 0.0000(10) 0.0022(11) 0.0032(11)
C9 0.0277(17) 0.0150(11) 0.0270(14) 0.0027(10) 0.0038(12) -0.0055(11)
C15 0.0298(18) 0.0307(14) 0.0246(14) -0.0060(12) 0.0062(12) -0.0040(13)
B1 0.0167(16) 0.0167(13) 0.0178(13) -0.0017(10) 0.0041(11) -0.0009(10)
C8 0.0259(16) 0.0197(12) 0.0228(13) 0.0011(10) 0.0003(11) 0.0062(11)
F19 0.149(12) 0.006(3) 0.042(5) 0.006(3) 0.042(8) -0.011(5)
F17 0.107(13) 0.037(6) 0.069(8) -0.030(5) -0.073(9) 0.020(6)
F18 0.024(5) 0.041(5) 0.150(12) -0.056(8) 0.043(7) -0.001(4)
 
_geom_special_details
;
 All esds (except the esd in the dihedral angle between two l.s. planes)
 are estimated using the full covariance matrix.  The cell esds are taken
 into account individually in the estimation of esds in distances, angles
 and torsion angles; correlations between esds in cell parameters are only
 used when they are defined by crystal symmetry.  An approximate (isotropic)
 treatment of cell esds is used for estimating esds involving l.s. planes.
;
 
loop_
 _geom_bond_atom_site_label_1
 _geom_bond_atom_site_label_2
 _geom_bond_distance
 _geom_bond_site_symmetry_2
 _geom_bond_publ_flag
Br1 Co1 2.3212(4) . ?
Co1 N1 2.023(2) . ?
Co1 N3 2.038(2) . ?
Co1 N5 2.044(2) . ?
F5 C5 1.340(3) . ?
F4 C5 1.329(4) . ?
F1 C1 1.335(3) . ?
F2 C1 1.345(3) . ?
F3 C1 1.326(3) . ?
F6 C5 1.338(3) . ?
N4 C8 1.349(3) . ?
N4 N3 1.360(3) . ?
N4 B1 1.572(4) . ?
N2 C4 1.338(3) . ?
N2 N1 1.368(3) . ?
N2 B1 1.571(4) . ?
F7 C9 1.321(5) . ?
N5 C10 1.351(3) . ?
N5 N6 1.373(3) . ?
C6 N3 1.349(3) . ?
C6 C7 1.379(4) . ?
C6 C5 1.489(4) . ?
N1 C2 1.340(4) . ?
N6 C12 1.344(3) . ?
N6 B1 1.567(4) . ?
C13 C14 1.503(4) . ?
C13 B1 1.608(4) . ?
C13 H13A 0.9900 . ?
C13 H13B 0.9900 . ?
C11 C12 1.380(4) . ?
C11 C10 1.387(4) . ?
C11 H11 0.9500 . ?
C2 C3 1.384(4) . ?
C2 C1 1.484(4) . ?
C3 C4 1.376(4) . ?
C3 H3 0.9500 . ?
C12 H12 0.9500 . ?
C10 C9 1.484(4) . ?
C7 C8 1.369(4) . ?
C7 H7 0.9500 . ?
C4 H4 0.9500 . ?
F8 C9 1.318(5) . ?
F9 C9 1.319(5) . ?
C14 C15 1.314(4) . ?
C14 H14 0.9500 . ?
C9 F17 1.203(9) . ?
C9 F18 1.244(9) . ?
C9 F19 1.319(8) . ?
C15 H15A 0.9500 . ?
C15 H15B 0.9500 . ?
C8 H8 0.9500 . ?
 
loop_
 _geom_angle_atom_site_label_1
 _geom_angle_atom_site_label_2
 _geom_angle_atom_site_label_3
 _geom_angle
 _geom_angle_site_symmetry_1
 _geom_angle_site_symmetry_3
 _geom_angle_publ_flag
N1 Co1 N3 92.12(9) . . ?
N1 Co1 N5 90.02(9) . . ?
N3 Co1 N5 94.94(9) . . ?
N1 Co1 Br1 122.62(6) . . ?
N3 Co1 Br1 119.79(6) . . ?
N5 Co1 Br1 128.14(6) . . ?
C8 N4 N3 109.5(2) . . ?
C8 N4 B1 129.1(2) . . ?
N3 N4 B1 121.3(2) . . ?
C4 N2 N1 109.3(2) . . ?
C4 N2 B1 129.9(2) . . ?
N1 N2 B1 120.7(2) . . ?
C10 N5 N6 105.7(2) . . ?
C10 N5 Co1 140.91(18) . . ?
N6 N5 Co1 112.51(15) . . ?
N3 C6 C7 110.7(2) . . ?
N3 C6 C5 121.3(2) . . ?
C7 C6 C5 128.0(3) . . ?
C2 N1 N2 106.1(2) . . ?
C2 N1 Co1 139.47(17) . . ?
N2 N1 Co1 114.20(16) . . ?
C6 N3 N4 105.9(2) . . ?
C6 N3 Co1 140.19(17) . . ?
N4 N3 Co1 113.65(16) . . ?
C12 N6 N5 109.4(2) . . ?
C12 N6 B1 129.1(2) . . ?
N5 N6 B1 121.4(2) . . ?
C14 C13 B1 118.0(2) . . ?
C14 C13 H13A 107.8 . . ?
B1 C13 H13A 107.8 . . ?
C14 C13 H13B 107.8 . . ?
B1 C13 H13B 107.8 . . ?
H13A C13 H13B 107.1 . . ?
C12 C11 C10 104.4(2) . . ?
C12 C11 H11 127.8 . . ?
C10 C11 H11 127.8 . . ?
N1 C2 C3 110.8(2) . . ?
N1 C2 C1 121.1(2) . . ?
C3 C2 C1 128.1(3) . . ?
C4 C3 C2 104.6(2) . . ?
C4 C3 H3 127.7 . . ?
C2 C3 H3 127.7 . . ?
N6 C12 C11 109.3(2) . . ?
N6 C12 H12 125.3 . . ?
C11 C12 H12 125.3 . . ?
F4 C5 F6 106.8(2) . . ?
F4 C5 F5 107.0(2) . . ?
F6 C5 F5 106.8(2) . . ?
F4 C5 C6 113.2(3) . . ?
F6 C5 C6 110.2(2) . . ?
F5 C5 C6 112.4(2) . . ?
N5 C10 C11 111.1(2) . . ?
N5 C10 C9 121.0(2) . . ?
C11 C10 C9 127.9(2) . . ?
C8 C7 C6 105.1(2) . . ?
C8 C7 H7 127.5 . . ?
C6 C7 H7 127.5 . . ?
N2 C4 C3 109.1(2) . . ?
N2 C4 H4 125.4 . . ?
C3 C4 H4 125.4 . . ?
F3 C1 F1 107.3(2) . . ?
F3 C1 F2 107.4(2) . . ?
F1 C1 F2 106.6(2) . . ?
F3 C1 C2 110.9(2) . . ?
F1 C1 C2 112.3(2) . . ?
F2 C1 C2 112.1(2) . . ?
C15 C14 C13 125.0(3) . . ?
C15 C14 H14 117.5 . . ?
C13 C14 H14 117.5 . . ?
F17 C9 F18 110.0(10) . . ?
F8 C9 F9 105.2(4) . . ?
F17 C9 F19 107.8(9) . . ?
F18 C9 F19 107.4(9) . . ?
F8 C9 F7 104.4(4) . . ?
F9 C9 F7 105.5(4) . . ?
F17 C9 C10 112.2(6) . . ?
F18 C9 C10 111.0(5) . . ?
F8 C9 C10 115.1(3) . . ?
F9 C9 C10 112.4(3) . . ?
F19 C9 C10 108.2(5) . . ?
F7 C9 C10 113.2(3) . . ?
C14 C15 H15A 120.0 . . ?
C14 C15 H15B 120.0 . . ?
H15A C15 H15B 120.0 . . ?
N6 B1 N2 107.7(2) . . ?
N6 B1 N4 107.5(2) . . ?
N2 B1 N4 107.0(2) . . ?
N6 B1 C13 112.0(2) . . ?
N2 B1 C13 113.1(2) . . ?
N4 B1 C13 109.3(2) . . ?
N4 C8 C7 108.8(2) . . ?
N4 C8 H8 125.6 . . ?
C7 C8 H8 125.6 . . ?
 
loop_
 _geom_torsion_atom_site_label_1
 _geom_torsion_atom_site_label_2
 _geom_torsion_atom_site_label_3
 _geom_torsion_atom_site_label_4
 _geom_torsion
 _geom_torsion_site_symmetry_1
 _geom_torsion_site_symmetry_2
 _geom_torsion_site_symmetry_3
 _geom_torsion_site_symmetry_4
 _geom_torsion_publ_flag
C4 N2 N1 C2 -0.5(3) . . . . ?
B1 N2 N1 C2 -179.7(2) . . . . ?
C4 N2 N1 Co1 175.65(16) . . . . ?
B1 N2 N1 Co1 -3.5(3) . . . . ?
C7 C6 N3 N4 -0.4(3) . . . . ?
C5 C6 N3 N4 179.7(3) . . . . ?
C7 C6 N3 Co1 -174.0(2) . . . . ?
C5 C6 N3 Co1 6.2(5) . . . . ?
C8 N4 N3 C6 -0.1(3) . . . . ?
B1 N4 N3 C6 -179.4(2) . . . . ?
C8 N4 N3 Co1 175.46(19) . . . . ?
B1 N4 N3 Co1 -3.9(3) . . . . ?
C10 N5 N6 C12 -1.1(3) . . . . ?
Co1 N5 N6 C12 170.52(18) . . . . ?
C10 N5 N6 B1 175.5(2) . . . . ?
Co1 N5 N6 B1 -12.9(3) . . . . ?
N2 N1 C2 C3 0.2(3) . . . . ?
Co1 N1 C2 C3 -174.3(2) . . . . ?
N2 N1 C2 C1 -178.5(2) . . . . ?
Co1 N1 C2 C1 6.9(4) . . . . ?
N1 C2 C3 C4 0.1(3) . . . . ?
C1 C2 C3 C4 178.8(3) . . . . ?
N5 N6 C12 C11 0.7(3) . . . . ?
B1 N6 C12 C11 -175.6(3) . . . . ?
C10 C11 C12 N6 0.0(3) . . . . ?
N3 C6 C5 F4 -67.1(4) . . . . ?
C7 C6 C5 F4 113.1(4) . . . . ?
N3 C6 C5 F6 173.3(3) . . . . ?
C7 C6 C5 F6 -6.5(5) . . . . ?
N3 C6 C5 F5 54.3(4) . . . . ?
C7 C6 C5 F5 -125.5(3) . . . . ?
N6 N5 C10 C11 1.1(3) . . . . ?
Co1 N5 C10 C11 -166.6(2) . . . . ?
N6 N5 C10 C9 -177.6(2) . . . . ?
Co1 N5 C10 C9 14.8(5) . . . . ?
C12 C11 C10 N5 -0.7(3) . . . . ?
C12 C11 C10 C9 177.9(3) . . . . ?
N3 C6 C7 C8 0.8(4) . . . . ?
C5 C6 C7 C8 -179.4(3) . . . . ?
N1 N2 C4 C3 0.6(3) . . . . ?
B1 N2 C4 C3 179.7(2) . . . . ?
C2 C3 C4 N2 -0.4(3) . . . . ?
N1 C2 C1 F3 -178.8(2) . . . . ?
C3 C2 C1 F3 2.6(4) . . . . ?
N1 C2 C1 F1 61.1(3) . . . . ?
C3 C2 C1 F1 -117.5(3) . . . . ?
N1 C2 C1 F2 -58.9(3) . . . . ?
C3 C2 C1 F2 122.6(3) . . . . ?
B1 C13 C14 C15 123.5(3) . . . . ?
N5 C10 C9 F17 -80.7(10) . . . . ?
C11 C10 C9 F17 100.9(10) . . . . ?
N5 C10 C9 F18 42.8(10) . . . . ?
C11 C10 C9 F18 -135.6(9) . . . . ?
N5 C10 C9 F8 -2.5(5) . . . . ?
C11 C10 C9 F8 179.1(5) . . . . ?
N5 C10 C9 F9 118.0(4) . . . . ?
C11 C10 C9 F9 -60.4(5) . . . . ?
N5 C10 C9 F19 160.5(8) . . . . ?
C11 C10 C9 F19 -17.9(8) . . . . ?
N5 C10 C9 F7 -122.5(4) . . . . ?
C11 C10 C9 F7 59.1(5) . . . . ?
C12 N6 B1 N2 126.9(3) . . . . ?
N5 N6 B1 N2 -48.9(3) . . . . ?
C12 N6 B1 N4 -118.1(3) . . . . ?
N5 N6 B1 N4 66.1(3) . . . . ?
C12 N6 B1 C13 2.0(4) . . . . ?
N5 N6 B1 C13 -173.9(2) . . . . ?
C4 N2 B1 N6 -119.3(3) . . . . ?
N1 N2 B1 N6 59.7(3) . . . . ?
C4 N2 B1 N4 125.4(3) . . . . ?
N1 N2 B1 N4 -55.6(3) . . . . ?
C4 N2 B1 C13 5.0(4) . . . . ?
N1 N2 B1 C13 -176.1(2) . . . . ?
C8 N4 B1 N6 125.9(3) . . . . ?
N3 N4 B1 N6 -54.9(3) . . . . ?
C8 N4 B1 N2 -118.7(3) . . . . ?
N3 N4 B1 N2 60.5(3) . . . . ?
C8 N4 B1 C13 4.1(4) . . . . ?
N3 N4 B1 C13 -176.7(2) . . . . ?
C14 C13 B1 N6 64.5(3) . . . . ?
C14 C13 B1 N2 -57.4(3) . . . . ?
C14 C13 B1 N4 -176.5(2) . . . . ?
N3 N4 C8 C7 0.5(3) . . . . ?
B1 N4 C8 C7 179.8(3) . . . . ?
C6 C7 C8 N4 -0.8(4) . . . . ?
 
_refine_diff_density_max    0.897
_refine_diff_density_min   -0.889
_refine_diff_density_rms    0.078

_shelx_res_file
;

    shelx.res created by SHELXL-2014/7

TITL SIR92 run in space group P 21/n
CELL  0.71073   8.5753  15.3150  15.7479   90.000   94.460   90.000
ZERR     4.00   0.0005   0.0009   0.0009    0.000    0.003    0.000
LATT   1
SYMM  1/2 - X, 1/2 + Y, 1/2 - Z
SFAC  C    H    N    F    CO   BR   B
UNIT  60 44 24 36 4 4 4
MERG   2
OMIT     0   1   1
FMAP  -2
PLAN   25
SIZE     0.050   0.150   0.300
ACTA    55.00
HTAB    2.00000
BOND
BOND   $H
CONF
LIST   4
L.S.   4
TEMP  -160.00
WGHT    0.009700    0.786400
FVAR       4.36434
BR1   6    0.746256    0.145920    0.595539    11.00000    0.03361    0.02844 =
         0.02119   -0.00908    0.00011    0.00623
CO1   5    0.700407    0.226428    0.715977    11.00000    0.01452    0.01603 =
         0.01473   -0.00280    0.00127   -0.00087
F5    4    0.414702    0.280592    0.543106    11.00000    0.03994    0.03215 =
         0.03119   -0.00626   -0.00255   -0.00990
F4    4    0.614310    0.357726    0.516868    11.00000    0.03762    0.05503 =
         0.02384   -0.00663    0.00994   -0.00658
F1    4    1.096813    0.276838    0.655820    11.00000    0.03832    0.03515 =
         0.01725   -0.00086    0.00934    0.00779
F2    4    1.098091    0.159726    0.730979    11.00000    0.03469    0.01781 =
         0.04179   -0.00648    0.01491    0.00141
F3    4    1.277033    0.256860    0.756008    11.00000    0.01312    0.04972 =
         0.04075   -0.01470    0.00428   -0.00168
F6    4    0.385980    0.415342    0.506889    11.00000    0.05711    0.04416 =
         0.02606    0.00110   -0.01721    0.02106
N4    3    0.565645    0.382924    0.778466    11.00000    0.01647    0.01702 =
         0.01587   -0.00181    0.00243    0.00213
N2    3    0.822906    0.335497    0.853585    11.00000    0.01762    0.01345 =
         0.01456   -0.00206   -0.00122   -0.00175
PART    1
F7    4    0.415467   -0.009898    0.793726    10.70000    0.02700    0.04326 =
         0.14582   -0.05431    0.00335   -0.01391
PART    0
N5    3    0.604353    0.184890    0.823722    11.00000    0.01146    0.01602 =
         0.01828   -0.00125    0.00017   -0.00249
C6    1    0.495940    0.388122    0.643606    11.00000    0.02042    0.01890 =
         0.01752   -0.00043    0.00109    0.00174
N1    3    0.873584    0.286774    0.788306    11.00000    0.01282    0.01757 =
         0.01454   -0.00413    0.00379   -0.00039
N3    3    0.571515    0.338146    0.704191    11.00000    0.01546    0.01821 =
         0.01193   -0.00288    0.00116   -0.00056
N6    3    0.574566    0.252474    0.877432    11.00000    0.01584    0.01595 =
         0.01379   -0.00386    0.00335   -0.00032
C13   1    0.607563    0.410818    0.941159    11.00000    0.01984    0.01469 =
         0.01987   -0.00395    0.00434   -0.00166
AFIX  23
H13A  2    0.642350    0.470022    0.925887    11.00000   -1.20000
H13B  2    0.492714    0.413331    0.943950    11.00000   -1.20000
AFIX   0
C11   1    0.464148    0.134501    0.928976    11.00000    0.02354    0.02367 =
         0.02345    0.00160    0.00625   -0.00402
AFIX  43
H11   2    0.408202    0.096566    0.963426    11.00000   -1.20000
AFIX   0
C2    1    1.030182    0.290438    0.796623    11.00000    0.01662    0.01519 =
         0.01890    0.00010    0.00246   -0.00096
C3    1    1.081450    0.340497    0.866495    11.00000    0.01388    0.02731 =
         0.02045   -0.00650   -0.00308   -0.00125
AFIX  43
H3    2    1.186336    0.353454    0.886366    11.00000   -1.20000
AFIX   0
C12   1    0.490194    0.222861    0.939850    11.00000    0.02205    0.02198 =
         0.02062   -0.00171    0.00701   -0.00272
AFIX  43
H12   2    0.454122    0.257357    0.984477    11.00000   -1.20000
AFIX   0
C5    1    0.479181    0.360015    0.552868    11.00000    0.02257    0.02746 =
         0.02372    0.00304   -0.00186    0.00102
C10   1    0.538074    0.113589    0.856414    11.00000    0.01412    0.01555 =
         0.02047    0.00077    0.00263   -0.00163
C7    1    0.441259    0.463652    0.678532    11.00000    0.02564    0.02588 =
         0.02576    0.00287   -0.00055    0.00733
AFIX  43
H7    2    0.383492    0.509259    0.649848    11.00000   -1.20000
AFIX   0
C4    1    0.946609    0.367300    0.900743    11.00000    0.01888    0.02300 =
         0.01503   -0.00377   -0.00091   -0.00432
AFIX  43
H4    2    0.942042    0.402730    0.950005    11.00000   -1.20000
AFIX   0
PART    1
F8    4    0.627328    0.025474    0.746660    10.70000    0.12377    0.03217 =
         0.06407   -0.02178    0.06871   -0.02768
PART    0
C1    1    1.125612    0.246132    0.734790    11.00000    0.01394    0.01986 =
         0.02339   -0.00204    0.00173   -0.00029
PART    1
F9    4    0.626530   -0.030159    0.868185    10.70000    0.11371    0.03372 =
         0.05451   -0.00773   -0.03160    0.04139
PART    0
C14   1    0.679472    0.390239    1.028958    11.00000    0.02619    0.02061 =
         0.02013   -0.00003    0.00220    0.00316
AFIX  43
H14   2    0.658094    0.334561    1.051982    11.00000   -1.20000
AFIX   0
C9    1    0.552107    0.026422    0.816552    11.00000    0.02772    0.01498 =
         0.02695    0.00271    0.00383   -0.00547
C15   1    0.769672    0.443385    1.076317    11.00000    0.02975    0.03066 =
         0.02464   -0.00597    0.00620   -0.00405
AFIX  93
H15A  2    0.793746    0.499633    1.055518    11.00000   -1.20000
H15B  2    0.810798    0.425554    1.131350    11.00000   -1.20000
AFIX   0
B1    7    0.643376    0.345919    0.864793    11.00000    0.01671    0.01671 =
         0.01778   -0.00171    0.00412   -0.00091
C8    1    0.488197    0.458717    0.763470    11.00000    0.02592    0.01970 =
         0.02283    0.00109    0.00030    0.00620
AFIX  43
H8    2    0.469340    0.501611    0.805030    11.00000   -1.20000
AFIX   0
PART    2
F19   4    0.522639   -0.033486    0.873347    10.30000    0.14852    0.00576 =
         0.04176    0.00578    0.04151   -0.01126
F17   4    0.459911    0.016780    0.755733    10.30000    0.10718    0.03745 =
         0.06911   -0.02983   -0.07318    0.02012
F18   4    0.687393    0.013708    0.795934    10.30000    0.02444    0.04114 =
         0.15010   -0.05577    0.04305   -0.00134
HKLF    4

REM  SIR92 run in space group P 21/n
REM R1 =  0.0376 for    4186 Fo > 4sig(Fo)  and  0.0402 for all    4652 data
REM    325 parameters refined using      0 restraints

END

WGHT      0.0091      0.7866

REM Instructions for potential hydrogen bonds
EQIV $1 x-1/2, -y+1/2, z+1/2
HTAB C12 Br1_$1
EQIV $2 -x+3/2, y+1/2, -z+3/2
HTAB C8 F2_$2

REM Highest difference peak  0.897,  deepest hole -0.889,  1-sigma level  0.078
Q1    1   0.6875  0.1152  0.6217  11.00000  0.05    0.90
Q2    1   0.7947  0.1706  0.5762  11.00000  0.05   -0.89
Q3    1   0.7270  0.1624  0.6194  11.00000  0.05   -0.58
Q4    1   0.6596  0.1492  0.8390  11.00000  0.05    0.47
Q5    1   0.7993 -0.0203  0.7842  11.00000  0.05    0.47
Q6    1   0.2976  0.2774  0.9744  11.00000  0.05    0.47
Q7    1   0.3514  0.3535  0.4663  11.00000  0.05    0.47
Q8    1   0.3021  0.2743  0.5935  11.00000  0.05    0.45
Q9    1   0.6996  0.0682  0.7195  11.00000  0.05    0.45
Q10   1   0.7588  0.1170  0.5970  11.00000  0.05   -0.45
Q11   1   0.7456  0.3045  0.5956  11.00000  0.05    0.44
Q12   1   0.4541 -0.0210  0.8406  11.00000  0.05    0.42
Q13   1   0.7545 -0.0991  0.9011  11.00000  0.05    0.41
Q14   1   0.5069  0.3727  0.6118  11.00000  0.05    0.37
Q15   1   0.5424  0.1625  0.8251  11.00000  0.05    0.36
Q16   1   0.4495  0.1813  0.9217  11.00000  0.05    0.36
Q17   1   0.4700  0.1210  0.8828  11.00000  0.05    0.36
Q18   1   1.0611  0.3234  0.8212  11.00000  0.05    0.35
Q19   1   0.7902  0.1981  0.5437  11.00000  0.05    0.34
Q20   1   0.5142  0.4199  0.7808  11.00000  0.05    0.34
Q21   1   0.8775  0.3443  0.8778  11.00000  0.05    0.34
Q22   1   0.6481  0.4398  0.9560  11.00000  0.05    0.34
Q23   1   0.5918  0.2275  0.8589  11.00000  0.05    0.33
Q24   1   0.6131  0.3761  0.9131  11.00000  0.05    0.33
Q25   1   0.6322  0.4027  1.0045  11.00000  0.05    0.33
;
_shelx_res_checksum    5715

_shelx_hkl_file
;
 -11   0   2 105.171 105.193   1
 -11   0   337074.8037074.80   1
 -11   0   4 324.198 324.216   1
 -11   1   2 3083.42 1329.51   1
 -11   1   3 345.293 155.885   1
 -11   1   4 158.147 71.9959   1
 -11   2   1 1727.99 1728.01   1
 -11   2   2 2182.78 2182.81   1
 -11   2   311644.00 4369.07   1
 -10   0   1-28.7042 28.8987   1
 -10   0   220454.4020454.40   1
 -10   0   3 398.839 398.859   1
 -10   0   456822.4056822.40   1
 -10   0   5 523.009 523.055   1
 -10   0   6 5269.31 5269.33   1
 -10   0   7 220.522  220.54   1
 -10   0   8 8918.63 8918.65   1
 -10   0   9 9.67371 10.6474   1
 -10   0  10 823.631 823.644   1
 -10   1   1 306.337  172.27   1
 -10   1   2 359.573  338.00   1
 -10   1   3 1421.13 1421.14   1
 -10   1   418806.20 5499.76   1
 -10   1   5 6471.79 2432.27   1
 -10   1   6 9789.55 3504.17   1
 -10   1   7 1625.32 679.873   1
 -10   1   8 1053.67 452.135   1
 -10   1   9 753.581 331.174   1
 -10   1  1027238.20 7368.44   1
 -10   2   1 724.979 724.993   1
 -10   2   2 9958.82 3467.51   1
 -10   2   326159.90 6426.28   1
 -10   2   417399.80 5270.17   1
 -10   2   5 3061.25 1225.48   1
 -10   2   6 709.396 524.657   1
 -10   2   7 6600.94 2549.66   1
 -10   2   8 3605.90 1490.57   1
 -10   2   9 2234.27 963.081   1
 -10   2  10 1081.19 1081.21   1
 -10   3   1 4624.17 1785.00   1
 -10   3   2 2418.59 969.537   1
 -10   3   3  297.57 127.399   1
 -10   3   411120.80 3850.12   1
 -10   3   515881.00 5051.74   1
 -10   3   6 8728.55 3224.02   1
 -10   3   7 1665.84 704.244   1
 -10   3   8 8281.51 3183.94   1
 -10   3   9 317.579 142.138   1
 -10   4   1 4220.84 4220.86   1
 -10   4   2 498.543 208.275   1
 -10   4   3 8551.52 3119.58   1
 -10   4   4 1307.11 543.346   1
 -10   4   5 1010.93 425.694   1
 -10   4   612166.70 4262.26   1
 -10   4   7 3287.69 1367.08   1
 -10   4   8  471.31 296.019   1
 -10   4   9 103.544 101.422   1
 -10   5   1 497.436 497.455   1
 -10   5   210754.70 3806.42   1
 -10   5   3 3984.13 1595.29   1
 -10   5   4 4802.25 1907.11   1
 -10   5   5 5804.40 2285.23   1
 -10   5   6  638.03 276.701   1
 -10   5   7 4010.15 1669.43   1
 -10   5   8 5448.35 2252.89   1
 -10   6   125669.0025669.00   1
 -10   6   3  380.10 164.014   1
 -10   6   4 4869.37 1962.69   1
 -10   6   5 203.438 220.585   1
 -10   6   6 3531.00 1484.54   1
 -10   6   7 2367.55 1028.72   1
 -10   7   1 3910.65 3910.69   1
 -10   7   2 7679.81 7679.86   1
 -10   7   311022.20 4041.65   1
 -10   7   4 2295.75 2295.78   1
 -10   7   5 1281.06 562.766   1
 -10   7   6 1496.20 662.397   1
 -10   8   120208.9020208.90   1
 -10   8   2 52.1796 52.2201   1
 -10   8   3 507.354 507.376   1
 -10   8   4 5061.56 2119.74   1
  -9   0   1 348.265 348.283   1
  -9   0   2 191.801 191.825   1
  -9   0   387335.7087335.70   1
  -9   0   4 39.5308 39.6149   1
  -9   0   6  124.01 124.022   1
  -9   0   7 9423.94 9423.95   1
  -9   0   8  164.11 164.206   1
  -9   0   916186.8016186.80   1
  -9   0  10 443.653 443.677   1
  -9   0  11 1198.37 1198.40   1
  -9   0  12 249.201 249.243   1
  -9   0  1351341.5051341.50   1
  -9   1   1 514.964  195.54   1
  -9   1   2 3730.84 1340.32   1
  -9   1   3 713.148 426.706   1
  -9   1   4 8101.33 2706.93   1
  -9   1   582748.0082748.00   1
  -9   1   6 4444.19 1615.69   1
  -9   1   7 3609.60 1348.42   1
  -9   1   8 7587.36 2680.53   1
  -9   1   9 8085.81 2884.86   1
  -9   1  10 563.588 384.584   1
  -9   1  1136458.00 7020.14   1
  -9   1  12 1640.77 704.958   1
  -9   1  13 3410.06 1468.69   1
  -9   2   127022.30 5862.44   1
  -9   2   2 605.508 230.445   1
  -9   2   330264.70 6012.37   1
  -9   2   411184.8011184.80   1
  -9   2   5 1606.59 609.988   1
  -9   2   6 5906.91 2099.64   1
  -9   2   7 1871.00 722.965   1
  -9   2   8 2473.01 960.345   1
  -9   2   9 7798.42 2808.88   1
  -9   2  1016803.40 5198.37   1
  -9   2  1110546.50 3792.72   1
  -9   2  12 2537.94 1079.36   1
  -9   2  13 6826.50 2791.30   1
  -9   3   1 2533.60 937.727   1
  -9   3   2 7145.18 2435.01   1
  -9   3   336002.30 6002.61   1
  -9   3   422831.80 5614.73   1
  -9   3   514709.50 4386.96   1
  -9   3   6 7587.35 2631.89   1
  -9   3   736811.20 6283.81   1
  -9   3   819342.90 5449.27   1
  -9   3   924684.90 6276.71   1
  -9   3  10 586.445 373.277   1
  -9   3  11 441.219 190.171   1
  -9   3  12 719.453 317.284   1
  -9   4   161082.80 1954.40   1
  -9   4   2 8590.21 2873.51   1
  -9   4   3 3621.85 1330.53   1
  -9   4   4 2562.35 963.829   1
  -9   4   5 359.536  141.47   1
  -9   4   6 229.355 223.328   1
  -9   4   7 9319.37 3201.78   1
  -9   4   8 155.256 383.695   1
  -9   4   9 5085.54 1955.27   1
  -9   4  10 612.751 284.801   1
  -9   4  1112310.30 4364.54   1
  -9   4  12 8724.41 3403.51   1
  -9   5   1 8962.63 2322.93   1
  -9   5   2 2380.73 759.687   1
  -9   5   321790.60 5590.84   1
  -9   5   4 350.304 194.749   1
  -9   5   5 9555.22 3228.20   1
  -9   5   6 2555.72 990.089   1
  -9   5   764233.10 3493.72   1
  -9   5   8 77.3165 326.314   1
  -9   5   924654.10 6454.27   1
  -9   5  10 4059.50 1645.23   1
  -9   5  11 1697.26  844.74   1
  -9   5  12 11.0185 198.907   1
  -9   6   125266.50 4259.29   1
  -9   6   2 3140.61 834.313   1
  -9   6   3 7709.90 1885.32   1
  -9   6   4 5394.21 1627.47   1
  -9   6   5 274.901 111.088   1
  -9   6   6 592.213 227.992   1
  -9   6   728395.80 6583.19   1
  -9   6   8 409.935 171.976   1
  -9   6   9 7505.10 2846.80   1
  -9   6  1016023.30 5307.68   1
  -9   6  11 6081.93 2484.94   1
  -9   7   1 982.978 278.985   1
  -9   7   268088.90 1653.97   1
  -9   7   3 2511.69 655.554   1
  -9   7   4 283.751 197.891   1
  -9   7   512478.30 3478.43   1
  -9   7   6 1502.06 508.901   1
  -9   7   7 4386.10 1411.09   1
  -9   7   833031.50 5772.31   1
  -9   7   9 694.714 301.068   1
  -9   7  10 3025.75 1291.62   1
  -9   8   1 862.662 292.904   1
  -9   8   214506.80 3872.73   1
  -9   8   3 367.685 131.595   1
  -9   8   4 2491.04  823.56   1
  -9   8   5 391.604  335.32   1
  -9   8   615730.60 3974.16   1
  -9   8   7 367.409 120.831   1
  -9   8   8 367.915 160.566   1
  -9   8   9 88.9123 138.423   1
  -9   8  1026028.40 5799.26   1
  -9   9   1 5264.47 1686.14   1
  -9   9   231374.50 4894.04   1
  -9   9   3 93.3783 118.945   1
  -9   9   426388.30 4704.20   1
  -9   9   526227.90 4820.23   1
  -9   9   6 8379.24 2550.91   1
  -9   9   7 2195.92 745.302   1
  -9   9   827514.70 5955.79   1
  -9  10   1 2363.34 829.229   1
  -9  10   2 2535.35 860.395   1
  -9  10   319988.10 4322.02   1
  -9  10   4 2184.34 629.042   1
  -9  10   5 4144.33 1182.79   1
  -9  10   6 286.196 173.737   1
  -9  10   7 3996.62 1507.21   1
  -9  11   1 545.622 198.188   1
  -9  11   2  242.17 88.0495   1
  -9  11   3 185.905 96.3217   1
  -9  11   422091.50 4708.50   1
  -9  11   5 3554.00 957.875   1
  -8   0   1 82.5045 29.9551   1
  -8   0   4 5779.02 5779.04   1
  -8   0   5 237.637 237.654   1
  -8   0   678290.2078290.20   1
  -8   0   9 187.822 187.841   1
  -8   0  1016364.4016364.40   1
  -8   0  11-231.036 231.088   1
  -8   0  1275747.1075747.10   1
  -8   0  13 357.057 357.075   1
  -8   0  1431425.1031425.10   1
  -8   0  15 88.8254 88.8449   1
  -8   1   1 6997.44 1839.14   1
  -8   1   2 935.271 935.279   1
  -8   1   3 2831.95 2831.96   1
  -8   1   436063.70 5598.72   1
  -8   1   510634.60 3219.05   1
  -8   1   693723.80 2915.80   1
  -8   1   7 4786.50 4786.52   1
  -8   1   8 656.989 657.008   1
  -8   1   9 2185.57 810.488   1
  -8   1  10 493.477 191.933   1
  -8   1  11 6820.40 2428.41   1
  -8   1  12 3952.00 1520.49   1
  -8   1  13 168.645 454.524   1
  -8   1  1452517.90 5370.99   1
  -8   1  15 1854.54 1854.56   1
  -8   2   110229.80 2561.01   1
  -8   2   2 1473.83 383.347   1
  -8   2   311337.20 3361.76   1
  -8   2   4 507.665 141.772   1
  -8   2   5  944.01 482.406   1
  -8   2   6 9664.09 3013.01   1
  -8   2   8 6682.94 6682.96   1
  -8   2   9 6420.17 2214.99   1
  -8   2  10 6815.12 2380.41   1
  -8   2  11 1602.51 646.375   1
  -8   2  1242922.90 6114.31   1
  -8   2  1331712.60 6930.58   1
  -8   2  1429807.70 7197.85   1
  -8   2  15 686.141 393.347   1
  -8   3   1 7571.43 1936.86   1
  -8   3   245673.30 3921.78   1
  -8   3   311259.80 2705.08   1
  -8   3   4 694.964 152.891   1
  -8   3   5106232.0 2588.19   1
  -8   3   6 804.767 230.927   1
  -8   3   7 206.623 206.636   1
  -8   3   831771.60 5968.59   1
  -8   3   921064.00 5387.77   1
  -8   3  10 489.259 192.163   1
  -8   3  1116525.60 4915.55   1
  -8   3  12 166.126 685.213   1
  -8   3  13  334.92 334.935   1
  -8   3  14 1045.71 454.784   1
  -8   4   1 137.905  99.888   1
  -8   4   2 1147.74 311.616   1
  -8   4   327767.20 4004.89   1
  -8   4   442995.00 4187.33   1
  -8   4   5 976.959 244.878   1
  -8   4   6 2566.23 923.649   1
  -8   4   7 8871.22 2875.02   1
  -8   4   8 7351.79 2486.96   1
  -8   4   9 4398.69 1436.19   1
  -8   4  1036023.90 5189.51   1
  -8   4  11 8660.67 3042.73   1
  -8   4  12 2917.50 1166.23   1
  -8   4  1313771.00 4671.04   1
  -8   4  14 765.841 594.473   1
  -8   5   1 6132.25 1452.33   1
  -8   5   286563.60 2558.08   1
  -8   5   3 5952.65 1400.00   1
  -8   5   4 5810.65 1402.26   1
  -8   5   5 2297.45 644.442   1
  -8   5   6 137.845 137.864   1
  -8   5   7 210.641 453.105   1
  -8   5   841672.50 4582.80   1
  -8   5   9-67.7741 60.7285   1
  -8   5  10 352.924  108.22   1
  -8   5  11 122.039 88.4805   1
  -8   5  1212864.60 3639.19   1
  -8   5  13 1455.72 529.531   1
  -8   5  14 4105.51 1739.30   1
  -8   6   138442.6038442.60   1
  -8   6   2 458.913 458.934   1
  -8   6   315171.90 4280.83   1
  -8   6   418192.70 3899.20   1
  -8   6   5 563.828  153.43   1
  -8   6   614648.60 3515.09   1
  -8   6   7 8731.10 2905.35   1
  -8   6   8 528.368 179.319   1
  -8   6   941084.40 4904.08   1
  -8   6  1019257.00 4468.03   1
  -8   6  1146057.50 4896.52   1
  -8   6  12 711.128 257.013   1
  -8   6  13 65.1464 123.176   1
  -8   7   146882.80 4782.04   1
  -8   7   2 1041.23  367.98   1
  -8   7   347798.10 3841.23   1
  -8   7   4 5556.11 1369.42   1
  -8   7   5 86.5545 115.265   1
  -8   7   6 7773.83 1867.86   1
  -8   7   7 8729.26 2107.75   1
  -8   7   8  433.97 135.194   1
  -8   7   916562.80 4048.41   1
  -8   7  10 4596.94 1441.13   1
  -8   7  1129532.30 5680.89   1
  -8   7  12 762.737 248.695   1
  -8   7  13 1437.38 598.837   1
  -8   8   141830.10 4560.17   1
  -8   8   2 132.582 150.569   1
  -8   8   3 221.579 82.8634   1
  -8   8   4  477.42 139.185   1
  -8   8   5 735.695 186.271   1
  -8   8   6 1944.80 608.252   1
  -8   8   7 186.263 206.408   1
  -8   8   8 2033.13 524.725   1
  -8   8   926567.90 5328.55   1
  -8   8  10 293.367 148.102   1
  -8   8  1120538.00 4943.91   1
  -8   8  12 5984.73 1988.90   1
  -8   9   130447.90 5124.37   1
  -8   9   240549.80 4785.09   1
  -8   9   310709.10 2795.10   1
  -8   9   4 9452.73 2591.93   1
  -8   9   515163.90 3731.64   1
  -8   9   6 7505.13 2124.46   1
  -8   9   737337.70 5385.61   1
  -8   9   812668.20 3467.40   1
  -8   9   9 3018.39 867.062   1
  -8   9  10 1910.41  807.04   1
  -8   9  11 1127.00 431.379   1
  -8  10   115040.10 3238.99   1
  -8  10   2 3186.45 881.466   1
  -8  10   3 4383.63 1146.12   1
  -8  10   4 661.605 163.041   1
  -8  10   5 925.253 254.184   1
  -8  10   642570.10 4506.26   1
  -8  10   714636.90 3371.10   1
  -8  10   8 1620.08 469.157   1
  -8  10   9 8452.46 2360.22   1
  -8  10  10 3010.97 906.562   1
  -8  11   1 1761.75 592.284   1
  -8  11   2 4966.27 1318.89   1
  -8  11   3 505.492 156.677   1
  -8  11   4 5048.70 1322.25   1
  -8  11   552113.70 3623.91   1
  -8  11   6 114.246 133.147   1
  -8  11   710353.60 2780.13   1
  -8  11   8 3436.68 1002.10   1
  -8  11   9  298.65 149.212   1
  -8  12   1 588.397  262.07   1
  -8  12   2 3596.67 994.269   1
  -8  12   330294.70 4968.94   1
  -8  12   4 402.087 208.145   1
  -8  12   5 1735.23 606.769   1
  -8  12   6 4151.06 1187.64   1
  -8  12   721268.30 4580.82   1
  -8  12   8  218.02 71.2249   1
  -8  13   1 299.202  93.972   1
  -8  13   2 732.104 246.808   1
  -8  13   3 5930.65 1780.09   1
  -8  13   410992.30 2900.28   1
  -8  13   544697.10 5085.19   1
  -7   0   1 391.914  391.93   1
  -7   0   2 118.656 71.2459   1
  -7   0   3110052.0 4543.12   1
  -7   0   4 -284.41 284.428   1
  -7   0   5 7491.04 7491.06   1
  -7   0   6 6.82345 146.669   1
  -7   0   762352.4062352.40   1
  -7   0   8 151.091 151.188   1
  -7   0   9 9214.42 9214.45   1
  -7   0  11 13.1729 14.1195   1
  -7   0  12 103.758 103.804   1
  -7   0  1358492.0058492.00   1
  -7   0  14-102.975 103.061   1
  -7   0  15 3339.73 3339.74   1
  -7   0  16-81.7004 81.8615   1
  -7   1   134663.00 3323.75   1
  -7   1   217830.50 2861.02   1
  -7   1   3116654.0 2548.78   1
  -7   1   4 102.841 60.0834   1
  -7   1   5262086.0262086.0   1
  -7   1   6 1786.56 1786.57   1
  -7   1   750598.40 3324.88   1
  -7   1   8 4203.23 1234.34   1
  -7   1   911740.00 2786.41   1
  -7   1  10  263.35 263.367   1
  -7   1  11 1189.32  337.92   1
  -7   1  12 8043.56 2710.51   1
  -7   1  13 1168.94 457.605   1
  -7   1  14 3628.02 1405.18   1
  -7   1  1535664.10 6957.38   1
  -7   1  16 601.336 479.596   1
  -7   2   1 2718.99 784.069   1
  -7   2   214276.90 2740.58   1
  -7   2   311124.30 2278.13   1
  -7   2   467416.40 1671.79   1
  -7   2   5 9297.98 2810.84   1
  -7   2   636414.40 5534.76   1
  -7   2   721332.70 4083.69   1
  -7   2   8 7533.44 1951.93   1
  -7   2   9 1630.69 452.511   1
  -7   2  1015984.4015984.40   1
  -7   2  11 3074.32 908.144   1
  -7   2  1232201.10 6130.21   1
  -7   2  13 8662.21 2288.84   1
  -7   2  1427778.20 6494.68   1
  -7   2  15 263.224 112.149   1
  -7   2  1614575.40 5031.63   1
  -7   3   1156987.0 3521.80   1
  -7   3   216446.90 3063.76   1
  -7   3   3131701.0 2894.71   1
  -7   3   4 6148.84 1608.17   1
  -7   3   546873.90 4600.09   1
  -7   3   620598.40 4019.04   1
  -7   3   728276.00 3972.50   1
  -7   3   8 562.665 178.152   1
  -7   3   939691.80 4484.43   1
  -7   3  10 8581.31 8581.33   1
  -7   3  11 2603.30 954.666   1
  -7   3  1224512.20 4819.66   1
  -7   3  13 9181.56 2582.95   1
  -7   3  14 6048.23 1901.76   1
  -7   3  15 338.278 124.026   1
  -7   3  16 254.786 113.647   1
  -7   4   135275.40 3998.52   1
  -7   4   2 5506.17 1271.38   1
  -7   4   312703.80 2975.06   1
  -7   4   431717.60 4624.11   1
  -7   4   5 312.936 252.336   1
  -7   4   623652.90 3722.25   1
  -7   4   7 5561.96 1266.16   1
  -7   4   8 328.653 97.5222   1
  -7   4   927891.2027891.20   1
  -7   4  10 6787.69 6787.70   1
  -7   4  1144895.00 4180.53   1
  -7   4  1230784.80 5135.14   1
  -7   4  13-79.9712 263.111   1
  -7   4  1410431.20 2878.75   1
  -7   4  15 6867.22 2180.63   1
  -7   4  16 314.203 151.374   1
  -7   5   1261628.0 5649.42   1
  -7   5   242638.50 4210.16   1
  -7   5   317359.30 3729.90   1
  -7   5   4 7139.65 1565.99   1
  -7   5   5 6304.60 1459.15   1
  -7   5   6 85.6077 61.3434   1
  -7   5   720225.10 3453.50   1
  -7   5   8 346.215 118.773   1
  -7   5   960176.70 2561.68   1
  -7   5  10 226.571 205.051   1
  -7   5  1111633.30 3129.43   1
  -7   5  12 181.617 175.783   1
  -7   5  13 837.529 284.133   1
  -7   5  14 1566.79 581.796   1
  -7   5  15 1755.76 565.177   1
  -7   6   120213.30 3978.23   1
  -7   6   2 2790.96 680.055   1
  -7   6   3 2003.87 510.556   1
  -7   6   412138.20 2823.32   1
  -7   6   5 3695.56 914.489   1
  -7   6   610471.10 2589.10   1
  -7   6   7 4286.19 1192.25   1
  -7   6   822655.40 5350.10   1
  -7   6   919997.30 4103.71   1
  -7   6  1093835.20 2051.93   1
  -7   6  11 3921.54 1182.48   1
  -7   6  12 7396.70 2094.72   1
  -7   6  13 5454.39 1659.99   1
  -7   6  14 380.634 393.104   1
  -7   6  1512421.80 3543.60   1
  -7   7   133628.10 4613.63   1
  -7   7   278624.30 1720.54   1
  -7   7   324797.20 5395.73   1
  -7   7   4 7751.56 1978.50   1
  -7   7   511078.80 2437.76   1
  -7   7   6 1600.80 514.626   1
  -7   7   739322.10 4625.65   1
  -7   7   858435.60 2436.32   1
  -7   7   9 7906.17 2650.93   1
  -7   7  10 4385.62 1161.36   1
  -7   7  11 1860.95 572.096   1
  -7   7  1220233.50 4540.59   1
  -7   7  13 325.548  241.59   1
  -7   7  14 340.073 182.804   1
  -7   7  15 1514.12 608.231   1
  -7   8   1 6782.75 1541.27   1
  -7   8   2 9002.49 2239.35   1
  -7   8   345563.30 4791.29   1
  -7   8   4124993.0 2699.00   1
  -7   8   5 504.536 322.245   1
  -7   8   6 2432.68 714.324   1
  -7   8   710252.10 2643.52   1
  -7   8   828883.50 4311.60   1
  -7   8   9 430.496 117.504   1
  -7   8  10100161.0 2699.84   1
  -7   8  11 1260.68 343.859   1
  -7   8  1215787.00 4073.42   1
  -7   8  13 2973.36 950.631   1
  -7   8  14 3909.12 1207.27   1
  -7   9   119336.30 3976.27   1
  -7   9   214682.50 4163.23   1
  -7   9   3  277.35 84.9472   1
  -7   9   4-72.5225 252.289   1
  -7   9   511607.60 2443.59   1
  -7   9   6  234.40 96.6526   1
  -7   9   7  289.93 74.2867   1
  -7   9   834197.10 4396.83   1
  -7   9   9 4986.80 1288.64   1
  -7   9  10 9261.93 2676.96   1
  -7   9  1113430.80 3155.72   1
  -7   9  12 5627.41 1551.64   1
  -7   9  13  759.80 216.435   1
  -7  10   1 4265.90 1256.54   1
  -7  10   2 663.282 214.316   1
  -7  10   3 9872.97 2531.47   1
  -7  10   4 2619.51 807.045   1
  -7  10   5 888.979 235.461   1
  -7  10   652218.80 3421.54   1
  -7  10   721992.90 4556.07   1
  -7  10   827093.40 5082.46   1
  -7  10   9 1820.86 545.821   1
  -7  10  1028841.90 4774.51   1
  -7  10  11 282.882 120.307   1
  -7  10  1227137.80 5834.64   1
  -7  10  1322593.10 4779.73   1
  -7  11   1 4462.32 1124.94   1
  -7  11   2 1068.07 267.288   1
  -7  11   3 853.215 227.814   1
  -7  11   4 1874.40 480.467   1
  -7  11   514232.80 3008.34   1
  -7  11   654678.20 2847.60   1
  -7  11   7 285.558 185.511   1
  -7  11   8 225.849 199.413   1
  -7  11   9 365.101 102.466   1
  -7  11  10 309.337 100.129   1
  -7  11  1111141.50 2932.76   1
  -7  11  12 3604.06 1076.74   1
  -7  12   1 9595.27 2358.55   1
  -7  12   2 2908.22 827.351   1
  -7  12   3 2164.18 655.489   1
  -7  12   426412.20 4436.59   1
  -7  12   5 652.519 287.045   1
  -7  12   645203.60 4193.01   1
  -7  12   7 596.578 159.635   1
  -7  12   811397.90 2718.64   1
  -7  12   9 2600.32 822.651   1
  -7  12  10  356.05  115.15   1
  -7  13   1 173.301 156.451   1
  -7  13   2 828.635 237.239   1
  -7  13   3 2896.29 826.325   1
  -7  13   421673.00 4264.05   1
  -7  13   516030.20 3625.56   1
  -7  13   6 7601.22 1909.28   1
  -7  13   7 370.421 109.549   1
  -7  13   8 1040.70 319.919   1
  -7  13   9 4884.42 1407.14   1
  -7  14   1 9942.56 2769.27   1
  -7  14   2 7593.60 2058.01   1
  -7  14   3 4587.19 1313.02   1
  -7  14   4 2617.52 766.885   1
  -7  14   5 45.3122 221.819   1
  -7  14   6 1914.86 827.941   1
  -7  14   711496.00 3020.69   1
  -7  15   1 434.157  194.50   1
  -7  15   215541.70 3879.00   1
  -7  15   3 1325.48 395.596   1
  -7  15   417326.40 4199.05   1
  -6   0   1 92.0638 30.1448   1
  -6   0   2 1926.00 544.596   1
  -6   0   3  58.797 64.6649   1
  -6   0   431813.90 4787.71   1
  -6   0   5  -14.74 13.2403   1
  -6   0   688825.00 2830.92   1
  -6   0   7 56.9546 61.9814   1
  -6   0   849286.3049286.30   1
  -6   0   9-20.0986 223.113   1
  -6   0  1026218.70 5448.65   1
  -6   0  11 55.9636  151.63   1
  -6   0  1251288.00 3894.72   1
  -6   0  13 97.1718 65.3394   1
  -6   0  1428113.90 6066.53   1
  -6   0  15 41.0857 32.5203   1
  -6   0  16 9565.74 3403.57   1
  -6   0  17  85.579 85.6902   1
  -6   0  18 4003.69 4003.72   1
  -6   1   1 1847.72 464.025   1
  -6   1   2 17.8368 80.7714   1
  -6   1   3 7895.10 1554.51   1
  -6   1   471371.30 1955.43   1
  -6   1   554206.40 2731.82   1
  -6   1   6 2027.12 415.492   1
  -6   1   728803.50 3966.81   1
  -6   1   829090.80 4478.57   1
  -6   1   9 4620.75 1062.68   1
  -6   1  1020250.90 4045.87   1
  -6   1  11 234.323 143.431   1
  -6   1  1228499.10 4729.31   1
  -6   1  13 711.684 202.155   1
  -6   1  14101270.0 2216.83   1
  -6   1  15 3265.02 1101.89   1
  -6   1  1625196.80 5239.83   1
  -6   1  17 168.247  73.604   1
  -6   2   131518.90 3771.13   1
  -6   2   2 6213.07 1436.18   1
  -6   2   349647.20 3594.54   1
  -6   2   4 5044.89 1179.24   1
  -6   2   5 2407.69 547.802   1
  -6   2   649637.80 3343.07   1
  -6   2   7137653.0 3038.09   1
  -6   2   877237.0077237.00   1
  -6   2   9 6652.79 1392.47   1
  -6   2  10 8045.55 1616.12   1
  -6   2  11 426.133 113.272   1
  -6   2  1213374.4013374.40   1
  -6   2  1324702.80 5674.54   1
  -6   2  1411783.30 3094.12   1
  -6   2  15 404.699 116.136   1
  -6   2  16 922.009 266.165   1
  -6   2  17 5362.41 1623.44   1
  -6   3   116799.70 2578.72   1
  -6   3   231699.10 3789.21   1
  -6   3   320465.70 3537.60   1
  -6   3   413580.70 2686.10   1
  -6   3   588794.90 2276.58   1
  -6   3   6 486.424 119.908   1
  -6   3   7 6113.06 1375.26   1
  -6   3   8 8582.63 2627.46   1
  -6   3   9 1582.37 368.694   1
  -6   3  10 9773.16 2128.36   1
  -6   3  1113047.10 2661.02   1
  -6   3  13 1559.62 603.948   1
  -6   3  14 8007.33 2265.74   1
  -6   3  1554061.00 3496.55   1
  -6   3  16 3821.27 1350.90   1
  -6   3  17 650.278 271.161   1
  -6   4   136226.40 3729.17   1
  -6   4   2 2627.41 648.868   1
  -6   4   3 382.637 109.047   1
  -6   4   419110.90 3345.21   1
  -6   4   518024.00 3241.93   1
  -6   4   613015.40 2592.90   1
  -6   4   756960.90 2935.45   1
  -6   4   8 6376.24 1466.60   1
  -6   4   9 82.4237  69.986   1
  -6   4  10222379.0 4856.63   1
  -6   4  11 351.737 134.611   1
  -6   4  12 2946.88 838.653   1
  -6   4  1332328.10 4937.05   1
  -6   4  14 602.297 214.697   1
  -6   4  15 1806.29 540.831   1
  -6   4  16 9141.69 2727.19   1
  -6   4  17 1301.59 926.355   1
  -6   5   126780.20 3933.71   1
  -6   5   260053.60 2144.18   1
  -6   5   3106368.0 2629.37   1
  -6   5   4 388.935 92.6557   1
  -6   5   5 7408.97 1612.35   1
  -6   5   634639.90 4527.71   1
  -6   5   7 6150.37 1602.59   1
  -6   5   859386.50 1816.71   1
  -6   5   9 844.749  338.08   1
  -6   5  10 5312.55 1487.14   1
  -6   5  11  225.65 77.1194   1
  -6   5  1280351.80 1940.45   1
  -6   5  13 1345.08 480.808   1
  -6   5  14 413.138 147.651   1
  -6   5  15 3872.87 1236.02   1
  -6   5  16 8003.53 2457.20   1
  -6   5  17 4353.01 1525.68   1
  -6   6   121402.30 3573.54   1
  -6   6   2 2986.87 704.781   1
  -6   6   3149122.0 3737.48   1
  -6   6   4 5089.03 1194.13   1
  -6   6   533603.70 4595.44   1
  -6   6   6 5780.04 1866.63   1
  -6   6   7 374.941 90.8493   1
  -6   6   818634.50 3783.45   1
  -6   6   925533.20 4479.04   1
  -6   6  10101673.0 2337.96   1
  -6   6  1110486.90 2632.10   1
  -6   6  12 334.464 127.415   1
  -6   6  13 205.347 88.5623   1
  -6   6  14 451.296 149.242   1
  -6   6  15  213.45 74.8993   1
  -6   6  1617618.70 4818.61   1
  -6   7   1109771.0 2411.72   1
  -6   7   243714.60 3622.16   1
  -6   7   395266.00 2079.57   1
  -6   7   4 2644.13  727.27   1
  -6   7   5 2728.87 772.254   1
  -6   7   6 1033.48 288.008   1
  -6   7   727257.30 4571.38   1
  -6   7   821182.30 3611.86   1
  -6   7   925387.60 3930.27   1
  -6   7  10 3503.17 3503.20   1
  -6   7  11 4884.26 1222.35   1
  -6   7  12 111.013  100.60   1
  -6   7  13 5150.93 1390.30   1
  -6   7  14 371.493 107.741   1
  -6   7  1510494.80 3195.04   1
  -6   7  1611288.80 3498.51   1
  -6   8   147495.60 4520.61   1
  -6   8   2 3335.21 763.138   1
  -6   8   3195911.0 6737.84   1
  -6   8   4 9273.76 2820.79   1
  -6   8   5 3747.62 1268.37   1
  -6   8   622540.60 3703.45   1
  -6   8   7 5835.96 1469.61   1
  -6   8   855933.10 2506.13   1
  -6   8   955659.20 3029.25   1
  -6   8  10 6099.48 2095.89   1
  -6   8  1113372.30 2894.70   1
  -6   8  12 49.8047 35.2847   1
  -6   8  13 1122.56 421.771   1
  -6   8  14 4556.82 1320.96   1
  -6   8  15 3235.59 944.435   1
  -6   9   167511.70 1772.13   1
  -6   9   218961.30 3948.83   1
  -6   9   3 5383.48 1774.90   1
  -6   9   4 981.359 362.062   1
  -6   9   5 422.244 204.145   1
  -6   9   6 166.948 120.572   1
  -6   9   712915.30 3000.04   1
  -6   9   844624.10 5032.69   1
  -6   9   9 661.075 209.403   1
  -6   9  10 170.349 142.563   1
  -6   9  11 9830.25 2759.84   1
  -6   9  12 1218.98 489.063   1
  -6   9  13 853.456 239.219   1
  -6   9  1416237.60 3634.98   1
  -6   9  15 203.818 74.0007   1
  -6  10   1 279.509 70.7417   1
  -6  10   2  109.93 157.628   1
  -6  10   3 1.74676 97.7538   1
  -6  10   4 4116.11 1042.61   1
  -6  10   5 9710.57 2489.90   1
  -6  10   616593.40 3727.46   1
  -6  10   784416.4084416.40   1
  -6  10   813254.40 2764.51   1
  -6  10   916026.30 3759.93   1
  -6  10  1024369.70 4938.32   1
  -6  10  11 5220.78 1393.40   1
  -6  10  12 7115.00 1909.93   1
  -6  10  13 8227.27 2654.76   1
  -6  10  14  896.16 253.344   1
  -6  11   1 6260.35 2093.54   1
  -6  11   243213.60 5156.11   1
  -6  11   310665.00 3291.68   1
  -6  11   4 557.328 208.267   1
  -6  11   549319.00 3685.09   1
  -6  11   6  253.88 367.155   1
  -6  11   7 204.112 102.741   1
  -6  11   815297.40 3247.04   1
  -6  11   9 3503.89 961.409   1
  -6  11  10 170.208 89.6377   1
  -6  11  11 666.726  186.01   1
  -6  11  12 4617.74 1277.88   1
  -6  11  13 391.037  199.97   1
  -6  12   110165.20 2595.35   1
  -6  12   2 2394.61 738.434   1
  -6  12   3 8319.99 2294.42   1
  -6  12   412719.70 2787.04   1
  -6  12   528870.30 4308.72   1
  -6  12   6 8111.56 1892.49   1
  -6  12   786821.10 2447.48   1
  -6  12   8 3583.64  988.59   1
  -6  12   9  183.88 88.2428   1
  -6  12  10 349.435 107.017   1
  -6  12  11 997.458 338.386   1
  -6  12  12 289.372 173.499   1
  -6  13   1 1166.54 298.832   1
  -6  13   2-28.2229 446.983   1
  -6  13   313628.30 2875.33   1
  -6  13   431253.30 4499.32   1
  -6  13   546013.40 3879.12   1
  -6  13   613423.60 2956.34   1
  -6  13   7 3200.78 898.688   1
  -6  13   8 165.463 191.876   1
  -6  13   9 1231.45 362.768   1
  -6  13  10 230.831 86.2604   1
  -6  13  11 4922.28 1500.73   1
  -6  14   1 3389.79 963.693   1
  -6  14   2 1423.06 406.909   1
  -6  14   3 202.193 90.3589   1
  -6  14   4 4283.98 1149.62   1
  -6  14   5 877.679 241.059   1
  -6  14   6 5891.57 1567.94   1
  -6  14   715858.80 3603.89   1
  -6  14   818284.10 4080.56   1
  -6  14   9 2736.22 814.644   1
  -6  14  10 766.682 250.617   1
  -6  15   127139.90 4717.24   1
  -6  15   2 1236.27 332.953   1
  -6  15   320357.40 4151.21   1
  -6  15   420892.00 4438.29   1
  -6  15   5 329.975 146.416   1
  -6  15   6 3215.74 968.528   1
  -6  15   7 545.742 188.898   1
  -6  15   8 9960.54 2626.83   1
  -6  16   1 5496.83 1600.58   1
  -6  16   2 464.272 145.067   1
  -6  16   3 7081.87 2047.61   1
  -6  16   4 283.888 153.449   1
  -6  16   5 1191.12 383.492   1
  -5   0   1 4034.78 1146.83   1
  -5   0   2 13.9315  87.095   1
  -5   0   352663.30 4883.36   1
  -5   0   4 77.8968 21.4673   1
  -5   0   5 396.923 128.727   1
  -5   0   6 72.6451 50.6416   1
  -5   0   7315860.0315860.0   1
  -5   0   8 77.2077 89.1219   1
  -5   0   9 9574.56 2311.96   1
  -5   0  10 221.691 112.749   1
  -5   0  11 994.782 994.788   1
  -5   0  12 179.795 331.873   1
  -5   0  13139797.0 3354.27   1
  -5   0  14 184.734 69.6536   1
  -5   0  15 1260.59 1260.60   1
  -5   0  16-48.1017 37.3853   1
  -5   0  1746870.50 5796.67   1
  -5   0  18 251.009 337.601   1
  -5   1   147907.70 3871.24   1
  -5   1   265107.20 2861.67   1
  -5   1   338461.00 3932.54   1
  -5   1   460151.30 2693.10   1
  -5   1   598015.00 2552.76   1
  -5   1   6 1504.94 351.954   1
  -5   1   7 1323.69 286.711   1
  -5   1   838163.80 3690.02   1
  -5   1   941432.40 3474.82   1
  -5   1  10 4173.41 886.671   1
  -5   1  1125848.20 4512.03   1
  -5   1  1218218.70 2844.88   1
  -5   1  1350048.30 3433.63   1
  -5   1  1446521.90 4005.11   1
  -5   1  1554986.20 3445.30   1
  -5   1  16 6484.68 1653.10   1
  -5   1  17 868.833 242.174   1
  -5   1  18 784.019 221.451   1
  -5   2   1 6398.63 1325.04   1
  -5   2   211162.00 2181.83   1
  -5   2   359484.10 3207.19   1
  -5   2   435448.40 4114.64   1
  -5   2   570977.00 1738.59   1
  -5   2   651195.90 3336.84   1
  -5   2   761096.70 2072.84   1
  -5   2   860536.00 2787.24   1
  -5   2   927194.10 4509.16   1
  -5   2  10 400.458  94.919   1
  -5   2  1114765.70 2840.50   1
  -5   2  12 958.617 244.662   1
  -5   2  1340526.80 3842.88   1
  -5   2  1427532.50 4838.19   1
  -5   2  15 2122.23 801.011   1
  -5   2  1614799.50 3333.67   1
  -5   2  17 2327.16 813.246   1
  -5   2  18 8542.08 2589.97   1
  -5   3   1142019.0 3474.47   1
  -5   3   2 4530.31 833.813   1
  -5   3   344016.20 4079.49   1
  -5   3   4430911.0 9479.98   1
  -5   3   5  536.07 173.009   1
  -5   3   638584.70 4275.50   1
  -5   3   7 9204.71 1755.01   1
  -5   3   840034.70 3618.34   1
  -5   3   9  203.36 148.175   1
  -5   3  10 1282.08 294.253   1
  -5   3  1121471.90 3580.89   1
  -5   3  1212082.80 2514.91   1
  -5   3  1326585.30 3600.03   1
  -5   3  1485229.60 1873.60   1
  -5   3  1513204.70 3374.61   1
  -5   3  1624046.90 4936.20   1
  -5   3  1715069.60 3895.41   1
  -5   3  18 1429.59 528.881   1
  -5   4   161735.80 2738.63   1
  -5   4   2 249.346 58.1589   1
  -5   4   342103.70 4412.80   1
  -5   4   4 7027.67 1594.28   1
  -5   4   512171.30 2200.79   1
  -5   4   6158288.0 3493.94   1
  -5   4   732626.60 3695.24   1
  -5   4   855609.90 2635.43   1
  -5   4   9129545.0 2833.94   1
  -5   4  10 6024.44 1592.34   1
  -5   4  1113121.20 2336.45   1
  -5   4  12 4300.98 971.571   1
  -5   4  1329102.30 4687.60   1
  -5   4  14 323.952 229.656   1
  -5   4  15 1128.28 302.764   1
  -5   4  16 6056.27 1844.75   1
  -5   4  17 2680.46 943.567   1
  -5   4  18 375.333 153.811   1
  -5   5   1357201.0 8362.79   1
  -5   5   220519.90 2967.39   1
  -5   5   3228013.0 6133.50   1
  -5   5   418741.60 3406.60   1
  -5   5   547641.90 3763.13   1
  -5   5   614289.30 2790.15   1
  -5   5   7 201.993 101.376   1
  -5   5   8 3276.74 787.094   1
  -5   5   9 391.264 112.329   1
  -5   5  10 285.583 73.5773   1
  -5   5  1183763.90 1826.31   1
  -5   5  1258358.80 1906.33   1
  -5   5  13 8259.10 2695.01   1
  -5   5  14 7774.36 2248.72   1
  -5   5  1510216.20 2394.88   1
  -5   5  16 9052.40 2630.13   1
  -5   5  1731385.40 5774.75   1
  -5   5  18 1714.99  690.78   1
  -5   6   1 482.991 153.283   1
  -5   6   286045.60 2240.55   1
  -5   6   371160.20 2037.05   1
  -5   6   4100407.0 2468.44   1
  -5   6   5 3128.50 758.862   1
  -5   6   611999.60 2489.48   1
  -5   6   7 335.203 89.2196   1
  -5   6   8  460.75  135.67   1
  -5   6   9133046.0 7004.12   1
  -5   6  1032432.90 4645.72   1
  -5   6  1112515.40 2590.47   1
  -5   6  12 1533.57 685.636   1
  -5   6  1322929.30 4444.99   1
  -5   6  14 2621.35 775.725   1
  -5   6  15 302.874 137.114   1
  -5   6  16 3223.06  863.42   1
  -5   6  17 591.914 177.664   1
  -5   7   150276.10 3157.60   1
  -5   7   291897.90 2148.84   1
  -5   7   343118.30 3934.04   1
  -5   7   4 4952.48 1162.69   1
  -5   7   520245.30 3472.61   1
  -5   7   6 4983.96 1171.40   1
  -5   7   7 927.497 324.997   1
  -5   7   843722.20 4993.45   1
  -5   7   9 315.885 84.9712   1
  -5   7  1011488.50 2434.68   1
  -5   7  11 4780.71 1419.94   1
  -5   7  12122516.0 3146.58   1
  -5   7  13 386.823 111.618   1
  -5   7  14 2332.23 600.299   1
  -5   7  15 7059.29 1864.07   1
  -5   7  16 267.166 86.0712   1
  -5   7  1713808.40 3536.67   1
  -5   8   123836.00 3346.08   1
  -5   8   210911.40 2232.15   1
  -5   8   3 2484.31 570.234   1
  -5   8   4118088.0 2769.40   1
  -5   8   5 315.901 78.8339   1
  -5   8   6 7439.72 2325.51   1
  -5   8   741173.9041173.90   1
  -5   8   818166.90 3267.82   1
  -5   8   9 5115.10 1401.36   1
  -5   8  1066296.10 2026.52   1
  -5   8  11 67.3478 178.088   1
  -5   8  12 6378.60 1664.09   1
  -5   8  13 5321.38 1493.98   1
  -5   8  14 5220.32 1363.44   1
  -5   8  15 753.644 217.458   1
  -5   8  16 2723.49 863.033   1
  -5   9   1 7597.32 1695.01   1
  -5   9   2 8382.42 1873.13   1
  -5   9   3 2273.87 639.733   1
  -5   9   4 5582.06 1805.80   1
  -5   9   5134936.0134936.0   1
  -5   9   6 3999.72 945.906   1
  -5   9   7 7261.43 1960.31   1
  -5   9   8 203.589 90.5604   1
  -5   9   923042.50 3753.25   1
  -5   9  1033568.40 5838.96   1
  -5   9  1115405.40 3150.91   1
  -5   9  1258325.60 2336.79   1
  -5   9  13 5232.24 1371.50   1
  -5   9  14 451.029 167.092   1
  -5   9  15 9044.72 2445.16   1
  -5   9  16 1370.86 482.723   1
  -5  10   119201.10 3876.29   1
  -5  10   2 382.705 122.275   1
  -5  10   325722.10 4400.09   1
  -5  10   4 2730.86 938.022   1
  -5  10   5 319.456 165.193   1
  -5  10   6 6994.90 1619.86   1
  -5  10   739566.40 3867.97   1
  -5  10   823258.60 3823.54   1
  -5  10   935371.90 5808.40   1
  -5  10  10 3697.04 1171.35   1
  -5  10  11 6527.95 1886.21   1
  -5  10  12 155.148 192.452   1
  -5  10  1314545.20 3328.03   1
  -5  10  14 4109.77 1185.09   1
  -5  10  15 336.712 112.391   1
  -5  11   117308.70 3162.34   1
  -5  11   2 6557.40 1455.51   1
  -5  11   3 4836.08 1303.94   1
  -5  11   460935.70 1576.95   1
  -5  11   546689.60 3334.17   1
  -5  11   612897.30 2636.83   1
  -5  11   7 367.216 119.044   1
  -5  11   832506.3032506.30   1
  -5  11   9 334.674 146.867   1
  -5  11  10 8345.88 2000.52   1
  -5  11  11 5467.18 1517.66   1
  -5  11  12 175.137 94.0289   1
  -5  11  13 172.987 68.6945   1
  -5  11  1420578.40 5034.33   1
  -5  11  15  503.11  269.68   1
  -5  12   1 445.941 128.627   1
  -5  12   2 2154.04 584.292   1
  -5  12   3 185.836 137.083   1
  -5  12   4 935.679 365.563   1
  -5  12   5 3055.39 1088.74   1
  -5  12   6130028.0130028.0   1
  -5  12   7 60.0554 40.7162   1
  -5  12   876329.10 1802.13   1
  -5  12   915588.90 3296.40   1
  -5  12  10 7604.76 1887.64   1
  -5  12  11 2643.64 748.177   1
  -5  12  1213035.10 3252.91   1
  -5  12  13 131.618 182.412   1
  -5  12  14 7786.47 2347.35   1
  -5  13   1 447.282 119.499   1
  -5  13   2 204.198  74.927   1
  -5  13   323969.80 3964.69   1
  -5  13   483317.40 2475.19   1
  -5  13   5 6340.08 2188.86   1
  -5  13   6 6220.51 1551.13   1
  -5  13   7 1017.73 284.936   1
  -5  13   815798.70 3314.02   1
  -5  13   9 9540.00 2326.38   1
  -5  13  10 303.353 160.223   1
  -5  13  11 5746.80 1567.51   1
  -5  13  12 565.919 262.826   1
  -5  13  13 369.013 126.247   1
  -5  14   1 150.192 183.354   1
  -5  14   2 404.242 123.998   1
  -5  14   3 6295.22 1561.63   1
  -5  14   4 996.728 262.769   1
  -5  14   5 491.218 205.281   1
  -5  14   637454.00 4547.86   1
  -5  14   753469.40 3149.17   1
  -5  14   810698.80 2632.71   1
  -5  14   9 1307.09 361.984   1
  -5  14  1018185.60 3949.03   1
  -5  14  11 402.871 123.561   1
  -5  15   1 815.214 228.667   1
  -5  15   242014.80 4238.51   1
  -5  15   3 161.674  97.312   1
  -5  15   4 3074.49 838.568   1
  -5  15   520837.60 4097.84   1
  -5  15   6 701.047  200.31   1
  -5  15   7 5484.02 1405.59   1
  -5  15   8 275.794 162.765   1
  -5  15   921483.50 4497.89   1
  -5  15  10 247.894  210.88   1
  -5  16   1 1867.61  572.93   1
  -5  16   2 626.773 261.992   1
  -5  16   3 229.917 172.933   1
  -5  16   420559.50 4228.86   1
  -5  16   5 8262.85 2227.11   1
  -5  16   6 2817.14 850.437   1
  -5  16   7 4414.79 1221.32   1
  -5  16   821041.60 4605.89   1
  -5  17   1 4610.10 1379.92   1
  -5  17   229834.60 5250.68   1
  -5  17   3 2168.66  642.50   1
  -5  17   4 4622.31 1367.30   1
  -5  17   5 95.9793 163.727   1
  -4   0   1  48.473 179.196   1
  -4   0   266000.40 6605.55   1
  -4   0   3-52.1891 62.3428   1
  -4   0   415546.80 3689.61   1
  -4   0   5-14.9726 118.547   1
  -4   0   6601393.0484084.0   1
  -4   0   7 117.037 232.855   1
  -4   0   8 4802.87 1226.25   1
  -4   0   9 3.68197 83.9302   1
  -4   0  10 326.839 115.241   1
  -4   0  11 245.549 86.7639   1
  -4   0  1235769.20 4543.19   1
  -4   0  13 500.613 179.655   1
  -4   0  14 274.823 92.2014   1
  -4   0  15 106.057 179.713   1
  -4   0  1632206.70 6151.22   1
  -4   0  17 213.594 86.4472   1
  -4   0  18 277.557 127.671   1
  -4   0  19 210.643 95.0645   1
  -4   1   119875.90 3402.39   1
  -4   1   2221375.0 4880.83   1
  -4   1   321484.00 3491.10   1
  -4   1   483242.50 2026.14   1
  -4   1   530472.60 3697.39   1
  -4   1   6144302.0 3328.80   1
  -4   1   7 2044.89 433.436   1
  -4   1   8247389.0 6987.02   1
  -4   1   938843.80 3809.35   1
  -4   1  10 7382.11 1308.08   1
  -4   1  1132622.30 3628.14   1
  -4   1  12  111.30 37.9394   1
  -4   1  13 9587.33 1937.14   1
  -4   1  1411105.10 2074.09   1
  -4   1  1555207.00 2226.63   1
  -4   1  1615887.30 3703.05   1
  -4   1  17 1628.09 1628.10   1
  -4   1  18 2826.05 929.475   1
  -4   1  19 472.433 135.043   1
  -4   2   158152.10 4724.90   1
  -4   2   225379.90 3875.20   1
  -4   2   3242389.0 5760.01   1
  -4   2   458238.50 4131.58   1
  -4   2   5 8941.47 1691.77   1
  -4   2   6229802.0 5475.84   1
  -4   2   728217.60 3285.25   1
  -4   2   885373.80 2751.77   1
  -4   2   911635.40 2011.97   1
  -4   2  1026289.30 3224.00   1
  -4   2  1151107.90 2555.29   1
  -4   2  1221161.20 3161.26   1
  -4   2  13 8128.27 1680.24   1
  -4   2  14 513.477 124.936   1
  -4   2  1511134.40 2154.38   1
  -4   2  16 1999.29 538.612   1
  -4   2  1716988.00 3520.79   1
  -4   2  18 5167.71 1463.99   1
  -4   2  19 1113.15 414.476   1
  -4   3   1 250.532 46.4603   1
  -4   3   2160374.0 3541.99   1
  -4   3   3 3877.06 760.206   1
  -4   3   4-76.4459 155.561   1
  -4   3   516442.60 3035.45   1
  -4   3   6 2503.66 571.392   1
  -4   3   717480.20 2962.68   1
  -4   3   817962.10 2714.15   1
  -4   3   948497.90 2997.21   1
  -4   3  1048699.60 3034.57   1
  -4   3  1186442.00 1946.11   1
  -4   3  1224218.80 3749.13   1
  -4   3  13 1722.13 440.304   1
  -4   3  1435362.50 3706.25   1
  -4   3  15103598.0 2277.25   1
  -4   3  16 3110.46 746.706   1
  -4   3  1714876.80 3361.43   1
  -4   3  1819448.40 4164.37   1
  -4   3  19 881.351 333.416   1
  -4   4   134111.80 5149.05   1
  -4   4   228623.40 4264.77   1
  -4   4   3  157.55  149.50   1
  -4   4   4346797.0346797.0   1
  -4   4   527720.50 4428.00   1
  -4   4   6 219.703 52.7548   1
  -4   4   782776.60 1829.24   1
  -4   4   870825.70 1740.79   1
  -4   4   912986.60 2292.46   1
  -4   4  1055608.50 2344.00   1
  -4   4  11 6306.74 1263.74   1
  -4   4  1220020.90 4041.84   1
  -4   4  13 7137.76 1601.63   1
  -4   4  1429257.70 4132.74   1
  -4   4  1512214.70 3092.18   1
  -4   4  1622910.00 3658.10   1
  -4   4  17 5539.04 1715.81   1
  -4   4  18 839.029 222.718   1
  -4   4  19 259.113 199.881   1
  -4   5   148932.70 4775.79   1
  -4   5   2430348.010837.00   1
  -4   5   3 114.573 103.386   1
  -4   5   4 9007.26 1809.16   1
  -4   5   514504.10 2391.86   1
  -4   5   691779.30 2025.64   1
  -4   5   7 4762.43 978.141   1
  -4   5   815257.30 2365.17   1
  -4   5   9 8808.97 1882.82   1
  -4   5  1022449.10 3650.38   1
  -4   5  1120175.10 3965.00   1
  -4   5  1273579.30 3010.41   1
  -4   5  1331778.90 4078.58   1
  -4   5  14 704.006 237.994   1
  -4   5  1515034.30 2837.20   1
  -4   5  16 302.803 141.003   1
  -4   5  17 162.522 74.8211   1
  -4   5  1831277.80 5909.21   1
  -4   6   117345.30 3056.26   1
  -4   6   2177856.0 4122.65   1
  -4   6   3102582.0 2519.16   1
  -4   6   4101088.0 2281.93   1
  -4   6   541000.70 3950.87   1
  -4   6   619679.80 3109.52   1
  -4   6   7 1602.26 332.037   1
  -4   6   8104570.0 2371.63   1
  -4   6   927003.20 3923.60   1
  -4   6  10181263.0 3958.03   1
  -4   6  1132180.90 3613.15   1
  -4   6  12 2998.47 731.867   1
  -4   6  1317334.40 2956.26   1
  -4   6  14 8709.94 2260.90   1
  -4   6  15 1415.85  377.72   1
  -4   6  16 3733.49 1271.16   1
  -4   6  17 289.482 273.097   1
  -4   6  18  299.57 117.067   1
  -4   7   189891.80 2009.20   1
  -4   7   2 7376.81 1484.69   1
  -4   7   324784.50 3576.28   1
  -4   7   4 106.384 47.4396   1
  -4   7   566131.50 1800.74   1
  -4   7   6 6765.22 1329.55   1
  -4   7   726710.10 3522.76   1
  -4   7   824810.60 3409.73   1
  -4   7   910317.00 2406.62   1
  -4   7  1042174.60 3712.73   1
  -4   7  11107409.0 2956.31   1
  -4   7  1212542.30 2687.28   1
  -4   7  1325554.10 5653.44   1
  -4   7  14 139.102 50.1156   1
  -4   7  15 4992.48 1269.94   1
  -4   7  1610102.30 2367.41   1
  -4   7  1730427.20 4983.10   1
  -4   7  18 148.918 261.924   1
  -4   8   1 2488.11 512.394   1
  -4   8   2 444.611 104.944   1
  -4   8   3282499.0282499.0   1
  -4   8   410243.30 1777.83   1
  -4   8   574382.10 1947.70   1
  -4   8   622612.80 3625.18   1
  -4   8   712644.60 2499.39   1
  -4   8   8 9308.75 2806.77   1
  -4   8   978245.20 2646.11   1
  -4   8  10 3779.36 1282.21   1
  -4   8  1167238.30 1478.65   1
  -4   8  12 4265.29 1484.54   1
  -4   8  13 5739.93 1327.84   1
  -4   8  14 798.533  256.26   1
  -4   8  15 6298.90 1944.92   1
  -4   8  16 2881.59 962.185   1
  -4   8  17 5738.63 1883.02   1
  -4   9   1178880.0 4242.77   1
  -4   9   237741.00 3720.24   1
  -4   9   350450.20 3006.43   1
  -4   9   421378.40 3556.09   1
  -4   9   5 299.011 72.8224   1
  -4   9   664704.30 1421.81   1
  -4   9   710689.00 3141.10   1
  -4   9   865336.80 1410.84   1
  -4   9   911220.20 2785.79   1
  -4   9  10 149.962 48.8603   1
  -4   9  1155099.80 3123.12   1
  -4   9  1224372.90 4507.81   1
  -4   9  13 1064.14 424.956   1
  -4   9  14 3358.44 1281.77   1
  -4   9  15 8737.22 2277.42   1
  -4   9  16 553.855 200.693   1
  -4   9  1718398.80 4833.64   1
  -4  10   157292.10 2605.72   1
  -4  10   2 8356.93 1788.53   1
  -4  10   319106.70 2919.23   1
  -4  10   4 6525.43 1455.13   1
  -4  10   5 8844.00 2691.88   1
  -4  10   626431.6026431.60   1
  -4  10   7 818.246 206.766   1
  -4  10   8 9236.24 1996.91   1
  -4  10   9 6730.91 1595.03   1
  -4  10  1031473.60 5802.29   1
  -4  10  11-2.95101 107.525   1
  -4  10  1220274.10 3802.76   1
  -4  10  13 3254.47 1023.08   1
  -4  10  14 2954.28 832.917   1
  -4  10  15 627.317 253.303   1
  -4  10  16 8197.10 2659.02   1
  -4  11   1 157.158 55.9185   1
  -4  11   235386.7035386.70   1
  -4  11   3 7460.77 2337.34   1
  -4  11   421128.40 4062.50   1
  -4  11   539030.30 3893.58   1
  -4  11   6 3245.06 778.852   1
  -4  11   7 2193.57 594.451   1
  -4  11   815682.50 3049.62   1
  -4  11   950775.60 4026.01   1
  -4  11  10 4192.13 1161.93   1
  -4  11  11 212.264 59.4518   1
  -4  11  12 8754.43 2087.80   1
  -4  11  1311277.10 2673.49   1
  -4  11  14 1061.33 276.467   1
  -4  11  1572940.20 1823.26   1
  -4  12   142447.60 3298.50   1
  -4  12   2 2632.27 726.916   1
  -4  12   3 6670.51 1556.39   1
  -4  12   412476.50 2521.16   1
  -4  12   519587.90 3422.65   1
  -4  12   632973.90 4129.52   1
  -4  12   780629.50 1741.06   1
  -4  12   813383.60 3939.74   1
  -4  12   9 4197.48 1088.82   1
  -4  12  10 5067.08 1294.46   1
  -4  12  11  23.486 197.259   1
  -4  12  12 2351.94 683.657   1
  -4  12  1329231.70 4844.60   1
  -4  12  14 401.703 261.915   1
  -4  12  15 7328.85 2269.76   1
  -4  13   110107.50 2549.21   1
  -4  13   2 836.638 299.278   1
  -4  13   3 6279.20 1420.19   1
  -4  13   4 480.622  142.24   1
  -4  13   5 1582.38 577.108   1
  -4  13   6 3583.78 3583.81   1
  -4  13   7 4553.17 1611.00   1
  -4  13   832809.20 4363.20   1
  -4  13   929292.90 4393.02   1
  -4  13  10 4167.61 1113.31   1
  -4  13  11 6458.19 1682.29   1
  -4  13  12 430.813 113.114   1
  -4  13  1318557.30 4129.92   1
  -4  13  14 6795.25 2308.04   1
  -4  14   1 6088.67 1458.67   1
  -4  14   214483.90 3426.75   1
  -4  14   3 463.177 174.595   1
  -4  14   413896.50 3408.71   1
  -4  14   522019.10 3896.12   1
  -4  14   680550.60 1886.45   1
  -4  14   714585.90 3047.03   1
  -4  14   8 970.039 283.646   1
  -4  14   9 512.553 153.542   1
  -4  14  1011952.50 2834.17   1
  -4  14  11 320.003 93.8924   1
  -4  14  12 5313.94 1522.82   1
  -4  14  13 236.214 124.811   1
  -4  15   125416.80 4209.02   1
  -4  15   2 2562.40 673.391   1
  -4  15   3 6098.25 1516.15   1
  -4  15   416665.80 3447.01   1
  -4  15   5 1115.82  297.90   1
  -4  15   6 9209.63 2204.30   1
  -4  15   7 473.491 147.446   1
  -4  15   828767.90 4783.39   1
  -4  15   9 1436.81 547.689   1
  -4  15  10 785.081 234.385   1
  -4  15  11 7030.66 1997.09   1
  -4  16   1 3202.37 989.641   1
  -4  16   2 2322.38 669.863   1
  -4  16   311327.50 2783.99   1
  -4  16   4 340.626 87.7739   1
  -4  16   5 8068.32 2047.52   1
  -4  16   626682.00 4714.81   1
  -4  16   7 524.697 155.451   1
  -4  16   8 166.165 173.254   1
  -4  16   9 4225.26 1241.33   1
  -4  16  10 6648.84 1949.17   1
  -4  17   140647.90 4737.19   1
  -4  17   2 4425.83 1243.38   1
  -4  17   3 6431.84 1802.81   1
  -4  17   4 2592.75 749.791   1
  -4  17   5 6432.96 1732.30   1
  -4  17   6 444.291 137.305   1
  -4  17   7 359.889 103.294   1
  -4  17   8 1689.71 530.799   1
  -4  18   1 352.214 124.201   1
  -4  18   2 1545.05 510.802   1
  -4  18   332150.90 5293.15   1
  -4  18   410420.80 2786.30   1
  -4  18   5 1968.18 612.234   1
  -3   0   1256185.0 5707.27   1
  -3   0   2-24.1117 93.8472   1
  -3   0   325921.10 5389.45   1
  -3   0   4-138.361 88.5619   1
  -3   0   5115714.0 3772.69   1
  -3   0   6-89.3647 64.0697   1
  -3   0   7157578.0 3402.64   1
  -3   0   8 -35.211 100.157   1
  -3   0   9 1080.80 364.144   1
  -3   0  10-20.8833 129.452   1
  -3   0  11 139.986 41.4303   1
  -3   0  12-8.49808 135.857   1
  -3   0  1358459.50 2164.50   1
  -3   0  14 413.651 149.304   1
  -3   0  1562944.60 1704.99   1
  -3   0  16  87.385  266.46   1
  -3   0  1793599.00 2061.27   1
  -3   0  18 137.061 121.894   1
  -3   0  19 1133.26 1133.28   1
  -3   0  20 92.4248  92.498   1
  -3   1   1221796.0 5273.20   1
  -3   1   225708.80 3914.56   1
  -3   1   320355.40 3264.31   1
  -3   1   4 1871.66 399.776   1
  -3   1   528099.70 4624.97   1
  -3   1   6108239.0 2608.01   1
  -3   1   772840.30 2550.61   1
  -3   1   821691.90 3533.12   1
  -3   1   9194790.0 4258.77   1
  -3   1  10 282.932 96.3689   1
  -3   1  1159661.90 2007.35   1
  -3   1  1225805.30 3178.00   1
  -3   1  1319727.20 2805.14   1
  -3   1  1414060.70 2515.68   1
  -3   1  15136656.0 3001.38   1
  -3   1  16 669.913 147.525   1
  -3   1  17 266.111 72.6783   1
  -3   1  18 3545.29 1171.73   1
  -3   1  19 3732.96 1316.09   1
  -3   1  20 1080.58 814.857   1
  -3   2   1106621.0 2401.65   1
  -3   2   265166.80 4772.94   1
  -3   2   3 7430.15 1591.88   1
  -3   2   4 7071.12 1499.78   1
  -3   2   590130.40 1998.94   1
  -3   2   6300802.0 6684.37   1
  -3   2   748521.30 4035.87   1
  -3   2   828219.10 4416.32   1
  -3   2   9 7151.52 1339.56   1
  -3   2  10230831.0 5091.05   1
  -3   2  1122913.10 3043.13   1
  -3   2  1221499.50 2928.40   1
  -3   2  13 3800.05 722.785   1
  -3   2  14 2116.88 516.912   1
  -3   2  1540497.60 3887.24   1
  -3   2  1669847.10 1827.34   1
  -3   2  1744818.50 3563.83   1
  -3   2  18 4493.50 1165.85   1
  -3   2  19 5253.89 1426.82   1
  -3   3   1108680.0 2402.39   1
  -3   3   296300.40 2524.16   1
  -3   3   321108.10 3952.02   1
  -3   3   428958.00 5274.07   1
  -3   3   527166.60 3981.74   1
  -3   3   615217.20 2450.77   1
  -3   3   7 8080.34 1666.73   1
  -3   3   8238460.0 5912.53   1
  -3   3   9 1309.31 352.228   1
  -3   3  10 5787.23 1089.49   1
  -3   3  11136126.0 2995.13   1
  -3   3  12 9310.02 1629.77   1
  -3   3  1334190.30 3622.03   1
  -3   3  1486229.50 2254.71   1
  -3   3  15 6334.61 1355.08   1
  -3   3  16 3887.22 894.847   1
  -3   3  17 3940.89 1051.06   1
  -3   3  18 935.677 272.965   1
  -3   3  19 499.309 148.201   1
  -3   4   116884.20 3117.27   1
  -3   4   219526.70 4851.21   1
  -3   4   3256225.0 5532.74   1
  -3   4   440400.50 5026.63   1
  -3   4   528483.80 3913.62   1
  -3   4   6216281.0 5260.08   1
  -3   4   759176.20 3048.99   1
  -3   4   848344.70 3408.10   1
  -3   4   936627.50 3540.45   1
  -3   4  1037447.10 3419.34   1
  -3   4  1113261.70 2340.79   1
  -3   4  1217995.50 2652.51   1
  -3   4  1399998.50 2615.40   1
  -3   4  14 3209.92 742.818   1
  -3   4  1516953.10 3826.59   1
  -3   4  1618356.30 3209.41   1
  -3   4  17 3540.69 849.401   1
  -3   4  18  169.91 88.8259   1
  -3   4  1934414.00 5228.24   1
  -3   5   183906.70 2718.29   1
  -3   5   2 9339.22 2006.42   1
  -3   5   314988.80 2683.54   1
  -3   5   4 4255.39 768.221   1
  -3   5   5231304.0 5387.26   1
  -3   5   651577.90 3345.19   1
  -3   5   727541.70 3573.35   1
  -3   5   816571.80 2598.79   1
  -3   5   9 9389.73 1703.75   1
  -3   5  1013096.00 2351.01   1
  -3   5  1194088.10 2096.42   1
  -3   5  1210378.50 2206.74   1
  -3   5  1318994.20 3056.67   1
  -3   5  14 5846.91 1228.89   1
  -3   5  1512645.70 3151.84   1
  -3   5  16 5137.02 1536.94   1
  -3   5  1720543.10 4018.68   1
  -3   5  18 5440.49 1533.55   1
  -3   5  19 145.431 184.769   1
  -3   6   116080.00 2805.43   1
  -3   6   238282.80 3999.31   1
  -3   6   3148293.0 3528.92   1
  -3   6   4108113.0 2633.02   1
  -3   6   5 3612.75 654.064   1
  -3   6   620122.80 2983.71   1
  -3   6   742603.20 3568.94   1
  -3   6   820908.30 2973.57   1
  -3   6   946344.50 3089.96   1
  -3   6  1053295.80 2414.47   1
  -3   6  11 83.1166 111.895   1
  -3   6  1255879.00 2101.29   1
  -3   6  1314721.80 2594.79   1
  -3   6  1435235.50 5776.48   1
  -3   6  15 3474.24 904.465   1
  -3   6  16 1043.24 296.582   1
  -3   6  17  155.65 102.054   1
  -3   6  18 1741.73 612.951   1
  -3   6  1925518.30 5204.81   1
  -3   7   1  651.27 116.458   1
  -3   7   2337832.0 7666.71   1
  -3   7   3 4210.73 835.131   1
  -3   7   456840.30 3341.20   1
  -3   7   5 1324.11 283.461   1
  -3   7   622180.70 3113.48   1
  -3   7   7 164.748 51.6832   1
  -3   7   8 2512.95 573.451   1
  -3   7   966425.30 1916.28   1
  -3   7  1037898.80 3597.97   1
  -3   7  1180110.60 2223.75   1
  -3   7  1276711.20 1867.54   1
  -3   7  13 3631.05 750.743   1
  -3   7  14 2725.83 989.193   1
  -3   7  15 1284.39 363.061   1
  -3   7  16 9858.86 2155.19   1
  -3   7  17 2929.87 849.403   1
  -3   7  1816958.80 3961.30   1
  -3   8   114612.60 2432.75   1
  -3   8   2206018.0 4822.40   1
  -3   8   3 3715.27 736.771   1
  -3   8   4170357.0 3768.40   1
  -3   8   5 6742.83 1262.15   1
  -3   8   6 1369.56 262.807   1
  -3   8   711655.10 1957.75   1
  -3   8   8 347.147 137.268   1
  -3   8   929276.30 4030.88   1
  -3   8  1080683.30 1987.44   1
  -3   8  11 1913.03 479.165   1
  -3   8  12 631.876 143.315   1
  -3   8  13 530.838 200.197   1
  -3   8  14 6391.05 1824.93   1
  -3   8  15 4590.02 1170.85   1
  -3   8  1610728.50 2591.49   1
  -3   8  17 8981.83 2700.61   1
  -3   8  1827266.90 6099.49   1
  -3   9   129754.40 3493.85   1
  -3   9   2226868.0 5019.79   1
  -3   9   337806.60 3514.65   1
  -3   9   4  280.57 63.6875   1
  -3   9   575915.20 1679.56   1
  -3   9   6 628.834 112.964   1
  -3   9   711596.40 2134.22   1
  -3   9   8 201.185 136.008   1
  -3   9   935098.40 3980.40   1
  -3   9  1021017.50 3181.93   1
  -3   9  11 5618.89 1130.60   1
  -3   9  1228621.90 4676.30   1
  -3   9  13 2389.19 599.921   1
  -3   9  14 2612.32 618.465   1
  -3   9  1561948.20 1895.24   1
  -3   9  16 5851.31 1698.24   1
  -3   9  17 2375.65 1012.15   1
  -3  10   138921.00 3748.49   1
  -3  10   283271.80 2274.91   1
  -3  10   328854.30 3303.54   1
  -3  10   420375.20 2833.87   1
  -3  10   5 4072.78 897.187   1
  -3  10   654246.20 2662.03   1
  -3  10   725538.2025538.20   1
  -3  10   846947.70 3313.03   1
  -3  10   935465.30 3624.38   1
  -3  10  1022196.10 3726.43   1
  -3  10  11 284.742 275.261   1
  -3  10  12 2139.55 671.011   1
  -3  10  1318045.00 3510.51   1
  -3  10  14 2776.15 853.723   1
  -3  10  15 3886.72 1289.80   1
  -3  10  1611794.20 3734.62   1
  -3  10  1728998.40 6345.50   1
  -3  11   1 3379.62 683.055   1
  -3  11   2 575.298  109.70   1
  -3  11   3 98.1686 71.4051   1
  -3  11   444143.70 3602.70   1
  -3  11   526542.3026542.30   1
  -3  11   6 2038.67 495.348   1
  -3  11   711666.60 2413.64   1
  -3  11   879555.40 2135.18   1
  -3  11   9 7160.08 1654.18   1
  -3  11  1045089.40 4921.44   1
  -3  11  11 6535.36 1631.48   1
  -3  11  12 448.556 114.901   1
  -3  11  13 2707.73 733.049   1
  -3  11  1430226.20 5395.74   1
  -3  11  1512684.90 3534.01   1
  -3  11  16 7632.86 2484.73   1
  -3  12   1 220.535 89.4592   1
  -3  12   245893.80 4755.09   1
  -3  12   3 79.3521  94.649   1
  -3  12   4 146.447 125.685   1
  -3  12   5 91.8993 71.4505   1
  -3  12   6141811.0 3795.01   1
  -3  12   7 4732.02 1143.15   1
  -3  12   826945.40 3993.29   1
  -3  12   9 2884.10 2884.11   1
  -3  12  1035832.30 4181.40   1
  -3  12  11 1569.93 372.684   1
  -3  12  1214482.30 3098.44   1
  -3  12  13 447.117 157.161   1
  -3  12  14 2280.64 863.965   1
  -3  12  15 9521.25 2876.37   1
  -3  13   1 202.078 77.3221   1
  -3  13   2 3540.30 757.097   1
  -3  13   3 818.827 173.706   1
  -3  13   4 2819.66  775.84   1
  -3  13   5 3587.60 859.789   1
  -3  13   6 8411.63 1845.36   1
  -3  13   7 248.637 248.676   1
  -3  13   8142523.0 3684.87   1
  -3  13   912077.60 2659.05   1
  -3  13  1022890.60 4121.79   1
  -3  13  11 2109.84 586.704   1
  -3  13  12 3485.50 916.675   1
  -3  13  13 1384.07 451.602   1
  -3  13  1452454.50 4593.32   1
  -3  14   193064.70 2553.73   1
  -3  14   213645.10 2389.91   1
  -3  14   325837.00 4533.68   1
  -3  14   426153.80 5627.95   1
  -3  14   511026.9011026.90   1
  -3  14   677039.00 2090.34   1
  -3  14   746480.80 3560.85   1
  -3  14   8 589.464 206.791   1
  -3  14   9 501.721 243.275   1
  -3  14  10 241.605 122.868   1
  -3  14  11  718.75 305.668   1
  -3  14  12 465.505 194.136   1
  -3  14  13 6610.45 2169.76   1
  -3  15   1 3518.55 758.792   1
  -3  15   211128.00 2402.40   1
  -3  15   3 4342.34 1319.80   1
  -3  15   4 3310.37 868.525   1
  -3  15   516699.90 3271.13   1
  -3  15   6 9653.11 2245.45   1
  -3  15   711838.50 2734.15   1
  -3  15   8 6518.98 1737.11   1
  -3  15   9 419.231 155.431   1
  -3  15  10 9601.85 2449.83   1
  -3  15  11 809.077 231.201   1
  -3  15  1217252.60 4736.16   1
  -3  16   132087.80 4485.92   1
  -3  16   219132.30 3686.12   1
  -3  16   3 174.178 188.091   1
  -3  16   479426.00 2312.32   1
  -3  16   514539.90 3192.29   1
  -3  16   6 1278.64 370.101   1
  -3  16   719464.00 3952.92   1
  -3  16   8 485.439 149.877   1
  -3  16   9 519.933 141.445   1
  -3  16  10 6251.67 1728.49   1
  -3  16  11 637.318 305.912   1
  -3  17   1 937.625  249.21   1
  -3  17   224610.90 4533.98   1
  -3  17   3 6154.23 1627.97   1
  -3  17   4 8751.09 2227.45   1
  -3  17   5 751.516 230.511   1
  -3  17   612061.00 2955.12   1
  -3  17   7 3869.74 1125.81   1
  -3  17   8 6166.77 1746.48   1
  -3  17   9 429.881  157.67   1
  -3  18   1 4782.37 1281.54   1
  -3  18   2 4918.51 1446.27   1
  -3  18   328449.60 4994.81   1
  -3  18   4 6138.27 1643.08   1
  -3  18   5 4162.76 1207.03   1
  -3  18   6 200.628 68.0565   1
  -3  18   7 1161.12 345.465   1
  -3  19   115544.20 3695.52   1
  -3  19   2 923.247 302.056   1
  -2   0   1-60.6987 112.919   1
  -2   0   212952.50 3318.68   1
  -2   0   3 143.735 62.7294   1
  -2   0   459680.80 7909.23   1
  -2   0   5 -11.262 45.1807   1
  -2   0   7-67.7885 187.807   1
  -2   0   8252957.0252957.0   1
  -2   0   9 94.3321 205.201   1
  -2   0  1037377.00 5223.02   1
  -2   0  11-87.0872 349.984   1
  -2   0  1248891.90 3810.13   1
  -2   0  13 117.056 64.4003   1
  -2   0  1472699.00 1569.81   1
  -2   0  15-75.7261 61.4592   1
  -2   0  16181534.0 3919.93   1
  -2   0  17   6.553  255.70   1
  -2   0  1816226.1016226.10   1
  -2   0  19 97.9151  140.17   1
  -2   0  20 1137.63 729.349   1
  -2   1   1156191.0 3468.41   1
  -2   1   210354.10 2023.56   1
  -2   1   3 9192.74 1838.18   1
  -2   1   447813.50 5847.93   1
  -2   1   533258.60 5081.67   1
  -2   1   630930.80 4605.38   1
  -2   1   7-46.3767 20.7453   1
  -2   1   8309915.0 7080.26   1
  -2   1   9 8306.32 1591.84   1
  -2   1  1014573.50 2384.35   1
  -2   1  1135440.00 3483.05   1
  -2   1  12 434.359 89.6159   1
  -2   1  13 7146.67 1294.87   1
  -2   1  1467308.80 1514.73   1
  -2   1  15  507.25 143.648   1
  -2   1  16 2816.09 656.155   1
  -2   1  17 5576.44 1255.98   1
  -2   1  18 9212.38 2614.01   1
  -2   1  19 1061.12 290.199   1
  -2   1  20 750.271 228.931   1
  -2   2   1605257.0587312.0   1
  -2   2   2776226.01941210.   1
  -2   2   3339398.0 7517.85   1
  -2   2   4383251.015865.40   1
  -2   2   540158.90 4978.79   1
  -2   2   6182555.0 4405.27   1
  -2   2   7201973.0 4837.57   1
  -2   2   8103353.0 2998.17   1
  -2   2   922573.70 3273.78   1
  -2   2  10  374.61 81.7301   1
  -2   2  11 4257.50 834.437   1
  -2   2  1224810.30 3134.02   1
  -2   2  1345214.30 2924.92   1
  -2   2  14 4356.77 914.455   1
  -2   2  1520722.60 3205.95   1
  -2   2  1644592.70 4211.31   1
  -2   2  1714292.60 3106.81   1
  -2   2  18 8892.22 1958.11   1
  -2   2  1919702.20 4180.53   1
  -2   2  2010094.20 3222.30   1
  -2   3   1236912.0 5174.01   1
  -2   3   282414.10 5674.13   1
  -2   3   3 589.308 115.112   1
  -2   3   4292868.0 6595.75   1
  -2   3   5254889.0 5614.77   1
  -2   3   6109846.0 2809.19   1
  -2   3   741443.10 5352.01   1
  -2   3   8 2953.52 620.164   1
  -2   3   959837.50 2788.78   1
  -2   3  1081901.10 1800.13   1
  -2   3  11 9574.27 1661.55   1
  -2   3  1212954.00 2131.68   1
  -2   3  1311673.70 2159.99   1
  -2   3  14 1145.29 279.838   1
  -2   3  1533553.40 3647.30   1
  -2   3  16 958.658 201.834   1
  -2   3  17 881.872 242.653   1
  -2   3  18 3630.97 884.738   1
  -2   3  19 9463.62 2912.98   1
  -2   3  20 6499.98 2233.96   1
  -2   4   1 469.349 90.6156   1
  -2   4   2151647.0 3504.78   1
  -2   4   3 1655.21 340.556   1
  -2   4   4688565.01217676.   1
  -2   4   5 5045.83 1277.71   1
  -2   4   6 6954.67 1702.34   1
  -2   4   790742.10 1996.34   1
  -2   4   836160.50 4317.47   1
  -2   4   914749.80 2624.75   1
  -2   4  1077602.50 1710.82   1
  -2   4  11 3584.46 698.256   1
  -2   4  12 1380.56 278.665   1
  -2   4  13 109.706 54.8786   1
  -2   4  1473848.30 1697.12   1
  -2   4  1512929.20 2200.48   1
  -2   4  16 371.018 92.3621   1
  -2   4  1721259.60 3569.25   1
  -2   4  1814560.90 3752.22   1
  -2   4  19 9847.77 3042.04   1
  -2   5   1102750.0 2338.55   1
  -2   5   2197663.0 4538.11   1
  -2   5   313827.70 3230.66   1
  -2   5   4269729.0 5824.35   1
  -2   5   5 72.7291  71.794   1
  -2   5   671364.60 2827.24   1
  -2   5   760839.70 3107.35   1
  -2   5   8 4002.93 863.912   1
  -2   5   9 7371.33 1347.56   1
  -2   5  1031065.30 3720.94   1
  -2   5  1112554.40 2218.20   1
  -2   5  12100687.0 2417.33   1
  -2   5  1318840.30 2954.84   1
  -2   5  1427399.70 4055.44   1
  -2   5  15 206.618 149.509   1
  -2   5  16 302.166 208.584   1
  -2   5  17 7178.67 2028.64   1
  -2   5  1831118.30 4869.22   1
  -2   5  19 99.9476 47.6329   1
  -2   6   128416.30 5996.74   1
  -2   6   2198183.0 4279.43   1
  -2   6   3107651.0 2475.65   1
  -2   6   4458356.035336.10   1
  -2   6   5 1957.41 420.151   1
  -2   6   6 8916.49 1663.93   1
  -2   6   725524.40 3418.32   1
  -2   6   8 1513.27 329.523   1
  -2   6   937608.50 3488.91   1
  -2   6  10 2678.71 745.916   1
  -2   6  11 5018.89 1046.63   1
  -2   6  1216810.90 2540.92   1
  -2   6  13100489.0 2364.36   1
  -2   6  14 6613.56 1363.93   1
  -2   6  15 9345.19 1726.59   1
  -2   6  16 9205.04 2233.61   1
  -2   6  17 1417.81 496.189   1
  -2   6  18 4582.47 1246.70   1
  -2   6  1921461.30 4658.18   1
  -2   7   1158503.0 3627.55   1
  -2   7   215175.40 2671.33   1
  -2   7   323340.00 3515.63   1
  -2   7   463892.30 3079.44   1
  -2   7   557692.40 3283.96   1
  -2   7   6 8889.71 1618.03   1
  -2   7   710638.40 2048.20   1
  -2   7   8 223.119  86.099   1
  -2   7   9 53.2654 76.0272   1
  -2   7  1021132.40 3131.92   1
  -2   7  1216849.80 2842.77   1
  -2   7  1331713.50 3391.32   1
  -2   7  14 201.657 83.3677   1
  -2   7  15 474.185 129.488   1
  -2   7  16 4073.23 1197.51   1
  -2   7  17 7004.43 1843.16   1
  -2   7  18 324.452 122.342   1
  -2   7  19 2472.42 870.012   1
  -2   8   141312.50 4087.69   1
  -2   8   238692.40 4049.19   1
  -2   8   367906.80 2357.95   1
  -2   8   4 9973.18 1929.09   1
  -2   8   577842.00 1720.81   1
  -2   8   665645.00 1917.90   1
  -2   8   7 9231.80 1620.73   1
  -2   8   8 5382.06 1146.43   1
  -2   8   958246.70 2290.83   1
  -2   8  1034596.90 3567.13   1
  -2   8  11 4726.30 1121.74   1
  -2   8  12 2267.61 569.215   1
  -2   8  13113719.0 2635.19   1
  -2   8  1432374.40 4270.89   1
  -2   8  15 8443.36 2268.91   1
  -2   8  16 6494.61 1683.53   1
  -2   8  17 1321.37 395.203   1
  -2   8  18  276.82 118.677   1
  -2   9   1 5603.39 1169.14   1
  -2   9   248337.30 3490.46   1
  -2   9   3 2079.99 407.755   1
  -2   9   4150102.0 4361.20   1
  -2   9   514175.30 2311.78   1
  -2   9   620470.60 3515.67   1
  -2   9   7 3795.26 810.486   1
  -2   9   821883.80 3240.29   1
  -2   9   9 6816.34 1414.13   1
  -2   9  10 2314.95 451.452   1
  -2   9  11225615.0 5097.90   1
  -2   9  1216035.50 2808.47   1
  -2   9  1320891.70 5201.77   1
  -2   9  1443321.50 3858.76   1
  -2   9  15 810.929 238.851   1
  -2   9  16 1205.34 415.125   1
  -2   9  17 1839.61 603.305   1
  -2   9  1815913.30 3868.90   1
  -2  10   1127604.0 3802.27   1
  -2  10   2 468.552 121.775   1
  -2  10   342141.10 3727.28   1
  -2  10   428827.40 3653.81   1
  -2  10   5 9570.42 1664.85   1
  -2  10   6148914.0 3321.16   1
  -2  10   754419.70 2287.64   1
  -2  10   8 1212.46  338.43   1
  -2  10   9 698.152 192.202   1
  -2  10  1031948.50 3370.78   1
  -2  10  11 9620.23 1868.83   1
  -2  10  1224645.30 4543.62   1
  -2  10  13 6107.79 1318.04   1
  -2  10  14 8827.20 2170.99   1
  -2  10  15 6529.16 1559.36   1
  -2  10  1620542.70 4210.74   1
  -2  10  1747298.40 5431.03   1
  -2  11   126622.70 3309.83   1
  -2  11   211911.60 1978.29   1
  -2  11   3 352.869 84.1869   1
  -2  11   424317.30 3394.37   1
  -2  11   569348.90 1606.45   1
  -2  11   647341.90 3356.59   1
  -2  11   734163.00 3612.24   1
  -2  11   8 2302.42 455.046   1
  -2  11   944738.60 2898.31   1
  -2  11  10 8145.49 1684.92   1
  -2  11  11 2192.71 794.722   1
  -2  11  12 227.814 117.784   1
  -2  11  1319408.60 3677.85   1
  -2  11  14 7444.80 1909.25   1
  -2  11  15 3242.84 917.497   1
  -2  11  16 1696.68 612.375   1
  -2  12   196229.20 2640.11   1
  -2  12   2 87.6879 61.3775   1
  -2  12   3 333.091 81.9543   1
  -2  12   4 2415.02 572.224   1
  -2  12   522924.50 3261.39   1
  -2  12   6 6129.52 1112.23   1
  -2  12   798182.70 2284.64   1
  -2  12   8 229.075 55.3394   1
  -2  12   928420.70 3983.06   1
  -2  12  10 5407.92 5407.93   1
  -2  12  11 5683.86 1375.55   1
  -2  12  12 8700.03 1895.51   1
  -2  12  13 4869.63 1494.22   1
  -2  12  14  58.147 176.219   1
  -2  12  1525525.90 5469.56   1
  -2  12  16  316.87 128.298   1
  -2  13   122672.40 3284.93   1
  -2  13   258060.80 2178.92   1
  -2  13   3 7159.55 1602.30   1
  -2  13   4 242.747 60.3125   1
  -2  13   528849.60 3352.15   1
  -2  13   6 7794.84 1425.92   1
  -2  13   762602.90 1441.10   1
  -2  13   837332.30 5670.68   1
  -2  13   971841.80 1986.34   1
  -2  13  10 776.354  191.67   1
  -2  13  11 114.321 106.111   1
  -2  13  12 3557.77 1131.27   1
  -2  13  1318405.30 4205.26   1
  -2  13  1416536.10 4297.54   1
  -2  13  1528270.40 5912.65   1
  -2  14   128752.20 3284.03   1
  -2  14   236129.20 3294.51   1
  -2  14   3 567.664 129.197   1
  -2  14   4 4293.51 843.421   1
  -2  14   5 6229.96 1244.95   1
  -2  14   617953.00 3422.13   1
  -2  14   7 3189.52 810.327   1
  -2  14   818145.70 3525.00   1
  -2  14   9 54.8202 102.823   1
  -2  14  1028753.30 4346.50   1
  -2  14  11  334.12 100.619   1
  -2  14  12  958.88 349.997   1
  -2  14  13 417.424 151.845   1
  -2  14  14 601.296 177.453   1
  -2  15   116865.10 3232.76   1
  -2  15   2 4843.78 1096.90   1
  -2  15   3  43.427 71.9682   1
  -2  15   4 3613.59 1034.39   1
  -2  15   511056.40 2658.39   1
  -2  15   6  996.39 272.705   1
  -2  15   7 845.046 238.836   1
  -2  15   847480.10 3696.14   1
  -2  15   9 458.447 134.188   1
  -2  15  10 1185.51 374.336   1
  -2  15  11 4914.29 1654.64   1
  -2  15  12 2925.00 1023.29   1
  -2  15  13 527.051  209.88   1
  -2  16   1 255.856 99.0251   1
  -2  16   2 417.372 145.764   1
  -2  16   354490.00 2653.10   1
  -2  16   4 6532.15 1621.35   1
  -2  16   514513.60 3168.43   1
  -2  16   628464.10 4482.75   1
  -2  16   7 311.849 283.367   1
  -2  16   8 8267.18 2107.01   1
  -2  16   923045.90 4490.72   1
  -2  16  10 2003.09 633.656   1
  -2  16  11 1495.22 534.951   1
  -2  17   1 8405.60 1812.17   1
  -2  17   2 5369.84 1191.75   1
  -2  17   3  533.49 178.575   1
  -2  17   4 256.193  166.55   1
  -2  17   530877.50 4773.14   1
  -2  17   613774.50 3235.45   1
  -2  17   7 396.335 193.172   1
  -2  17   8 2473.03 716.601   1
  -2  17   9  578.06 188.066   1
  -2  17  10 3012.46 1079.55   1
  -2  18   1 5321.13 1486.62   1
  -2  18   220272.80 4122.17   1
  -2  18   3 8054.00 2117.08   1
  -2  18   443373.90 4665.45   1
  -2  18   5 185.056 57.4131   1
  -2  18   6 467.031 176.531   1
  -2  18   7 79.8273 120.034   1
  -2  18   8 570.697 198.252   1
  -2  19   1 6045.87 1781.02   1
  -2  19   224709.80 4832.90   1
  -2  19   3 164.506 50.6762   1
  -2  19   4 3122.55 1081.13   1
  -2  19   5 9435.15 2636.05   1
  -1   0   2 83.4391 25.5795   1
  -1   0   3386536.082466.60   1
  -1   0   4 941.253 327.846   1
  -1   0   5 7841.11 2619.18   1
  -1   0   6 29.0662 40.1222   1
  -1   0   7117889.0 3824.21   1
  -1   0   8  352.69 192.979   1
  -1   0   986200.60 2012.79   1
  -1   0  10 116.296 55.7328   1
  -1   0  11259574.0 5667.05   1
  -1   0  12 62.9538 50.8225   1
  -1   0  1316735.80 3619.16   1
  -1   0  14 123.573 73.3142   1
  -1   0  15123673.0 5232.69   1
  -1   0  16-233.342 124.519   1
  -1   0  17174059.0174059.0   1
  -1   0  18 -23.539 408.366   1
  -1   0  19 4646.15 1827.07   1
  -1   0  20 404.437 179.707   1
  -1   1   117531.50 3597.79   1
  -1   1   2 2297.73 459.613   1
  -1   1   3162503.0 3604.23   1
  -1   1   475972.40 6665.05   1
  -1   1   5185490.0 4101.90   1
  -1   1   624389.10 4228.40   1
  -1   1   7517418.0178595.0   1
  -1   1   882379.40 2020.19   1
  -1   1   9237397.0 5571.11   1
  -1   1  10 1940.72 470.562   1
  -1   1  1112616.80 2081.36   1
  -1   1  12 5299.44 973.156   1
  -1   1  1316521.20 2508.94   1
  -1   1  14 9957.61 1867.91   1
  -1   1  15 8205.52 1636.96   1
  -1   1  16 1106.21 260.188   1
  -1   1  1732199.20 5029.96   1
  -1   1  1831824.20 4611.60   1
  -1   1  19 2204.51 642.768   1
  -1   1  20 140.345 124.448   1
  -1   2   1121420.0 6514.39   1
  -1   2   2295890.0 9433.24   1
  -1   2   3 6350.37 1399.69   1
  -1   2   489577.90 5412.27   1
  -1   2   552852.60 6722.53   1
  -1   2   615176.00 2950.05   1
  -1   2   773046.60 3754.67   1
  -1   2   832493.20 4525.39   1
  -1   2   931656.20 4200.62   1
  -1   2  10151852.0 3336.05   1
  -1   2  1133350.30 3540.36   1
  -1   2  1253305.60 2542.49   1
  -1   2  1357801.40 2039.24   1
  -1   2  1417325.80 3167.80   1
  -1   2  1592295.40 2331.79   1
  -1   2  1614098.50 3392.66   1
  -1   2  1751490.20 3484.54   1
  -1   2  18 714.605 209.276   1
  -1   2  19 8769.17 2263.88   1
  -1   2  20 9598.17 2576.38   1
  -1   3   1124395.0 4815.20   1
  -1   3   2470927.0164518.0   1
  -1   3   330264.10 5124.41   1
  -1   3   423547.90 4393.21   1
  -1   3   5206759.0 4570.41   1
  -1   3   617082.70 3486.33   1
  -1   3   737073.30 5545.57   1
  -1   3   8305643.0 6886.19   1
  -1   3   931940.80 4116.07   1
  -1   3  10-6.90954 74.3074   1
  -1   3  11108288.0 2391.75   1
  -1   3  1216506.40 2491.38   1
  -1   3  1322761.80 3280.15   1
  -1   3  1443019.80 3637.44   1
  -1   3  1536398.80 3686.02   1
  -1   3  16 209.503 130.029   1
  -1   3  17 555.258 148.977   1
  -1   3  1844933.60 4151.70   1
  -1   3  19  110.20 88.1502   1
  -1   3  20 665.703 218.873   1
  -1   4   1161474.0 3572.01   1
  -1   4   2122414.0 2924.25   1
  -1   4   3210349.0 4647.17   1
  -1   4   424459.30 4301.31   1
  -1   4   519660.60 3502.25   1
  -1   4   6 3835.36 1154.09   1
  -1   4   7 5052.53 1075.37   1
  -1   4   859541.40 3307.55   1
  -1   4   9 4464.67 957.691   1
  -1   4  1046623.90 3597.39   1
  -1   4  11 2301.69 460.499   1
  -1   4  12 4021.69  773.29   1
  -1   4  13135581.0 3120.67   1
  -1   4  14 4816.13 939.633   1
  -1   4  15 1110.67 326.227   1
  -1   4  1637498.30 5818.74   1
  -1   4  17 410.638 91.4136   1
  -1   4  18 1122.65 336.418   1
  -1   4  1942213.80 4879.73   1
  -1   4  20 95.2022 96.4011   1
  -1   5   1390675.023361.50   1
  -1   5   239053.50 5609.65   1
  -1   5   3 3400.13 771.878   1
  -1   5   4 344.359 148.754   1
  -1   5   5127978.0 2800.06   1
  -1   5   6117242.0 2591.79   1
  -1   5   723906.80 3825.20   1
  -1   5   8 4080.85 791.802   1
  -1   5   9 2622.95  630.37   1
  -1   5  1038208.20 3505.42   1
  -1   5  11217490.0 4805.29   1
  -1   5  1225755.80 3453.30   1
  -1   5  13 392.476 85.1129   1
  -1   5  1423612.70 3094.17   1
  -1   5  1550616.60 4047.45   1
  -1   5  16 3790.14  968.19   1
  -1   5  17 8391.14 1853.12   1
  -1   5  18 260.347   82.63   1
  -1   5  19 306.438 93.4925   1
  -1   6   176454.00 4190.17   1
  -1   6   2327849.0 7379.31   1
  -1   6   3168840.0 3691.02   1
  -1   6   4228643.0 5026.29   1
  -1   6   548376.90 4453.11   1
  -1   6   6208585.0 4600.35   1
  -1   6   7 3824.53 809.193   1
  -1   6   8 9912.91 2176.44   1
  -1   6   9 5455.92 1014.53   1
  -1   6  1083763.60 1852.17   1
  -1   6  1119788.00 2794.70   1
  -1   6  12 4991.86 1013.35   1
  -1   6  13102048.0 2857.92   1
  -1   6  14 2683.09 555.651   1
  -1   6  15 1100.62 296.569   1
  -1   6  16 3787.03 868.312   1
  -1   6  17 502.103 131.457   1
  -1   6  18 4911.07 1329.04   1
  -1   6  1928585.10 6003.95   1
  -1   7   133634.00 7767.63   1
  -1   7   2192287.0 4206.62   1
  -1   7   3169388.0 3740.89   1
  -1   7   4108976.0 2440.51   1
  -1   7   556806.80 3917.62   1
  -1   7   6335009.0 7320.71   1
  -1   7   7 3291.12 728.567   1
  -1   7   8 7070.96 1304.90   1
  -1   7   9 6730.96 1254.29   1
  -1   7  10121459.0 2684.33   1
  -1   7  1113492.60 2363.01   1
  -1   7  12130294.0 3200.76   1
  -1   7  1359693.10 1721.19   1
  -1   7  14 1030.79 237.687   1
  -1   7  15 3992.14 906.096   1
  -1   7  16 346.954 89.9407   1
  -1   7  17  287.24 101.053   1
  -1   7  1811216.00 2766.46   1
  -1   7  19 295.605 120.485   1
  -1   8   1 8181.09 1588.81   1
  -1   8   2128389.0 2968.15   1
  -1   8   389780.70 2063.98   1
  -1   8   4245291.0 5618.38   1
  -1   8   5 4288.98 1036.61   1
  -1   8   630147.70 3851.91   1
  -1   8   718324.80 2741.76   1
  -1   8   817729.10 2643.18   1
  -1   8   950070.70 2790.48   1
  -1   8  1015251.50 2579.91   1
  -1   8  1150641.20 2958.52   1
  -1   8  1251357.00 2597.01   1
  -1   8  13 285.294 192.327   1
  -1   8  1448567.30 4486.77   1
  -1   8  15 1253.72  277.76   1
  -1   8  16 706.476 202.445   1
  -1   8  17 6100.45 1634.71   1
  -1   8  18 6282.32 1785.88   1
  -1   9   152212.40 3626.24   1
  -1   9   235768.50 4731.21   1
  -1   9   3 5954.46 1248.04   1
  -1   9   424003.90 3291.99   1
  -1   9   571863.60 1588.53   1
  -1   9   682214.10 1947.30   1
  -1   9   719167.80 2788.96   1
  -1   9   955021.90 2354.02   1
  -1   9  1083200.40 2338.16   1
  -1   9  1126530.40 3228.52   1
  -1   9  1235727.00 3637.36   1
  -1   9  13 2751.31 825.041   1
  -1   9  14 568.581 159.467   1
  -1   9  1514090.20 2760.45   1
  -1   9  16 1778.85 409.761   1
  -1   9  1715246.70 3569.06   1
  -1   9  18 5.92096 21.4531   1
  -1  10   118359.50 2791.07   1
  -1  10   293758.80 2311.58   1
  -1  10   3157450.0 3791.51   1
  -1  10   4106396.0 2352.18   1
  -1  10   5 286.119 67.0273   1
  -1  10   615718.60 2447.28   1
  -1  10   722975.30 3320.10   1
  -1  10   8 5736.44 1080.31   1
  -1  10   953135.90 2672.85   1
  -1  10  10 4718.86 990.284   1
  -1  10  1150643.00 2477.63   1
  -1  10  12 4317.76 1224.11   1
  -1  10  1319500.60 4134.78   1
  -1  10  14  271.85 108.976   1
  -1  10  1510905.50 2620.33   1
  -1  10  1618459.60 4031.77   1
  -1  10  17 9162.74 2466.12   1
  -1  11   160338.60 2101.97   1
  -1  11   2115901.0 3222.66   1
  -1  11   3 7699.37 1379.97   1
  -1  11   424189.30 3438.31   1
  -1  11   5 353.095 139.245   1
  -1  11   6 3478.95 778.481   1
  -1  11   731473.20 3995.93   1
  -1  11   8136764.0 3286.50   1
  -1  11   916383.10 2510.95   1
  -1  11  1024793.10 3117.04   1
  -1  11  11 425.669 115.424   1
  -1  11  12 765.463 202.951   1
  -1  11  13 159.491 94.9037   1
  -1  11  1455383.30 2828.80   1
  -1  11  15 8028.10 2109.62   1
  -1  11  16 5662.40 1627.21   1
  -1  11  1713163.00 3566.07   1
  -1  12   114859.80 2319.21   1
  -1  12   2 2892.76 568.753   1
  -1  12   338317.20 3251.16   1
  -1  12   412591.20 2086.11   1
  -1  12   515767.70 2967.00   1
  -1  12   636739.40 3538.30   1
  -1  12   752282.90 2720.35   1
  -1  12   8 350.686 74.8936   1
  -1  12   9 5175.89 990.276   1
  -1  12  1054476.30 2779.83   1
  -1  12  11 2327.65 463.334   1
  -1  12  12 3488.82 910.682   1
  -1  12  13 925.416 233.944   1
  -1  12  14 131.287  148.09   1
  -1  12  15 1467.03 565.148   1
  -1  12  1681312.80 2155.54   1
  -1  13   140894.60 3420.32   1
  -1  13   247446.00 3757.30   1
  -1  13   316175.80 3018.56   1
  -1  13   4 347.538 90.5167   1
  -1  13   515256.60 2622.97   1
  -1  13   6 1502.81 325.654   1
  -1  13   7 4114.76 826.101   1
  -1  13   858076.60 2112.83   1
  -1  13   9 7286.21 2417.77   1
  -1  13  10 1243.59  301.73   1
  -1  13  11 6733.12 1649.21   1
  -1  13  12 134.737 91.7959   1
  -1  13  13 297.678 84.8447   1
  -1  13  1425834.30 4811.22   1
  -1  13  15 9440.05 2614.76   1
  -1  14   186870.40 1913.68   1
  -1  14   220077.60 3085.40   1
  -1  14   3 2750.18 541.687   1
  -1  14   412053.10 2044.66   1
  -1  14   535908.50 3320.65   1
  -1  14   6 6194.74 1308.72   1
  -1  14   745725.00 3521.85   1
  -1  14   8 3594.62 1060.48   1
  -1  14   9 735.921 177.745   1
  -1  14  1023573.60 3689.74   1
  -1  14  11 4325.71 1145.15   1
  -1  14  12 141.974 401.811   1
  -1  14  13 3399.84 1160.73   1
  -1  14  14 6143.65 1978.45   1
  -1  15   158885.30 1747.43   1
  -1  15   2 230.261  141.21   1
  -1  15   316111.90 2769.14   1
  -1  15   425573.20 4493.95   1
  -1  15   562286.60 1582.12   1
  -1  15   637827.60 5820.77   1
  -1  15   742407.40 3297.05   1
  -1  15   8 538.847 114.673   1
  -1  15   928180.30 4001.41   1
  -1  15  10 122.882 76.3333   1
  -1  15  11 6530.56 2091.88   1
  -1  15  1216993.90 4459.13   1
  -1  15  13 279.461 195.218   1
  -1  16   141465.80 5521.75   1
  -1  16   217895.80 3494.99   1
  -1  16   3 3545.43 890.241   1
  -1  16   422104.10 3899.23   1
  -1  16   550376.10 2749.36   1
  -1  16   6 246.592 97.6611   1
  -1  16   723313.80 3399.69   1
  -1  16   8 1447.55 353.095   1
  -1  16   9 370.715 155.667   1
  -1  16  10 9152.79 2769.84   1
  -1  16  11 141.157 96.4991   1
  -1  16  12 8870.97 2993.25   1
  -1  17   1 516.376 132.735   1
  -1  17   2 5422.90 1141.66   1
  -1  17   3 415.552 95.0302   1
  -1  17   431093.80 3725.13   1
  -1  17   5 2268.25 507.979   1
  -1  17   612013.30 2865.26   1
  -1  17   716495.80 3719.71   1
  -1  17   8 817.535 248.249   1
  -1  17   9 9169.62 2808.85   1
  -1  17  10 5123.12 1589.66   1
  -1  18   1 2539.00 644.377   1
  -1  18   213067.90 2819.70   1
  -1  18   393798.10 2102.91   1
  -1  18   426292.60 4199.04   1
  -1  18   5 595.341 178.255   1
  -1  18   6 227.845 135.605   1
  -1  18   7 941.068  297.58   1
  -1  18   8  970.32 388.631   1
  -1  19   112040.90 2642.08   1
  -1  19   2 1004.47 261.529   1
  -1  19   3 434.274 130.041   1
  -1  19   4 285.517 91.4455   1
  -1  19   523821.40 4936.25   1
   0   0   3 165.404 65.3814   1
   0   0   441170.00 8463.69   1
   0   0   5-112.978 83.7195   1
   0   0   6238124.0 5781.03   1
   0   0   7 634.742 249.782   1
   0   0   833203.80 5958.85   1
   0   0   9 40.9623 33.3364   1
   0   0  1037401.10 5300.81   1
   0   0  11 99.0827 135.693   1
   0   0  12 5848.04 1877.72   1
   0   0  13 109.937 108.051   1
   0   0  1435124.30 5579.31   1
   0   0  15-52.4573 136.809   1
   0   0  1698688.0098688.00   1
   0   0  17 218.173 237.262   1
   0   0  18 3024.51 1168.15   1
   0   0  19 295.699 341.737   1
   0   0  20 4333.41 1813.29   1
   0   1   1 144.624 144.632   1
   0   1   271635.40 7626.34   1
   0   1   3 2670.54 611.009   1
   0   1   418952.50 3835.32   1
   0   1   5320077.0 7084.94   1
   0   1   6188857.0 4175.15   1
   0   1   7227583.0 5207.88   1
   0   1   8139306.0 3070.02   1
   0   1   969754.70 2380.14   1
   0   1  1041340.80 3765.83   1
   0   1  11  246.66 57.3502   1
   0   1  1213623.70 2424.71   1
   0   1  13 3939.28 743.945   1
   0   1  14105278.0 2658.66   1
   0   1  1538358.20 3502.37   1
   0   1  16 324.534 121.675   1
   0   1  1711324.40 2964.05   1
   0   1  1865120.20 1430.67   1
   0   1  19 822.049 257.082   1
   0   1  20  688.07  212.76   1
   0   2   1 1697.53 349.798   1
   0   2   2151722.0 5418.89   1
   0   2   346186.10 7092.00   1
   0   2   428156.90 4922.44   1
   0   2   552000.70 6300.76   1
   0   2   646178.00 5497.81   1
   0   2   7204726.0 5032.41   1
   0   2   8 2226.50 560.242   1
   0   2   9190409.0 4381.80   1
   0   2  10 7311.38 1510.55   1
   0   2  11  370.15 81.4074   1
   0   2  1256698.00 2223.35   1
   0   2  1395477.80 2090.58   1
   0   2  1430344.90 4014.31   1
   0   2  15 3642.17 782.599   1
   0   2  1666762.90 1441.63   1
   0   2  1725399.60 4820.95   1
   0   2  18 8070.64 2065.96   1
   0   2  19 5753.29 1628.67   1
   0   2  20 617.508 238.296   1
   0   3   0 108.695 53.0529   1
   0   3   1149385.0 4455.81   1
   0   3   213759.60 2999.00   1
   0   3   3615463.0625964.0   1
   0   3   4110503.0 3337.20   1
   0   3   567476.40 5511.82   1
   0   3   6150114.0 3297.48   1
   0   3   784359.60 2266.57   1
   0   3   811989.80 2351.86   1
   0   3   9345393.0 7588.39   1
   0   3  1013514.90 2227.31   1
   0   3  11 6986.06 1260.95   1
   0   3  12117340.0 2593.48   1
   0   3  13 558.649 137.825   1
   0   3  14 125.767 96.6613   1
   0   3  1532094.00 3644.71   1
   0   3  16  365.03 137.924   1
   0   3  1730230.20 5134.65   1
   0   3  18 4696.19 1197.44   1
   0   3  19 2983.81 858.987   1
   0   3  20 4223.82 1247.14   1
   0   4   0 1331.94 600.428   1
   0   4   134986.60 6259.08   1
   0   4   3 102.342 65.9287   1
   0   4   4369723.0 8685.65   1
   0   4   534308.40 4968.32   1
   0   4   6 4823.88 1351.04   1
   0   4   755559.20 5006.01   1
   0   4   811749.40 2134.52   1
   0   4   956796.20 3057.97   1
   0   4  1055363.50 2767.59   1
   0   4  11 2006.68  415.93   1
   0   4  1265170.40 1940.22   1
   0   4  13 9073.87 2253.73   1
   0   4  1414423.30 2863.34   1
   0   4  15 3888.69 848.588   1
   0   4  1612496.70 3150.79   1
   0   4  1716344.00 3890.60   1
   0   4  1815786.50 3477.12   1
   0   4  19 5666.07 1560.75   1
   0   5   0-108.602 52.2095   1
   0   5   124789.10 4607.06   1
   0   5   2 966.819 215.855   1
   0   5   3 175.907 53.3781   1
   0   5   4269070.0 6176.81   1
   0   5   552605.90 5969.74   1
   0   5   6 2304.00 630.883   1
   0   5   7 387.681 99.9382   1
   0   5   878038.50 1730.20   1
   0   5   999344.00 2281.87   1
   0   5  1014381.80 2354.37   1
   0   5  1116409.80 2518.23   1
   0   5  12126819.0 2768.67   1
   0   5  1327799.60 3929.76   1
   0   5  1419020.80 3404.33   1
   0   5  1522439.50 4381.58   1
   0   5  16 8888.45 2007.94   1
   0   5  17 9277.89 2192.80   1
   0   5  18 4592.49 1236.46   1
   0   5  19 911.592 288.282   1
   0   6   043586.10 7770.23   1
   0   6   1 411.823 94.3537   1
   0   6   2 2226.50 613.697   1
   0   6   3215406.0 4735.52   1
   0   6   4191109.0 4179.81   1
   0   6   533885.80 5339.91   1
   0   6   6 9752.99 1972.25   1
   0   6   715323.30 2578.72   1
   0   6   8 1948.79  410.74   1
   0   6   9 604.975 125.858   1
   0   6  1029587.30 3348.27   1
   0   6  11 173.846 59.8263   1
   0   6  1230112.70 4588.42   1
   0   6  1363670.70 1852.36   1
   0   6  1428640.20 4124.12   1
   0   6  15 4910.91 1401.01   1
   0   6  16 3371.88 814.907   1
   0   6  17 306.044 96.1208   1
   0   6  1820539.10 4293.27   1
   0   6  1930696.60 5338.08   1
   0   7   0 1223.61 442.655   1
   0   7   194480.50 2141.34   1
   0   7   2 6061.69 1452.42   1
   0   7   3 8038.38 1957.41   1
   0   7   450478.30 4662.36   1
   0   7   5501351.092994.70   1
   0   7   612018.10 2173.76   1
   0   7   7100634.0 2224.52   1
   0   7   815486.40 2472.23   1
   0   7   9 3540.20  665.34   1
   0   7  10 6693.65 1493.55   1
   0   7  11101901.0 2221.18   1
   0   7  12  269.35 61.9114   1
   0   7  13  162.14 140.685   1
   0   7  14 1157.62 869.973   1
   0   7  1573052.80 1735.41   1
   0   7  16 68.7178 105.307   1
   0   7  17 1410.24 352.582   1
   0   7  18 894.117 251.027   1
   0   7  19 130.567 128.357   1
   0   8   0498324.0498324.0   1
   0   8   1 767.849 210.649   1
   0   8   211757.50 3723.08   1
   0   8   370790.50 3208.62   1
   0   8   4 253.873 107.933   1
   0   8   535222.40 4229.48   1
   0   8   678679.30 1736.02   1
   0   8   737139.50 3883.86   1
   0   8   827603.90 3636.63   1
   0   8   928687.40 3343.44   1
   0   8  10 8084.61 1470.81   1
   0   8  1123902.10 3376.93   1
   0   8  12 2202.94 534.256   1
   0   8  13131728.0 4041.78   1
   0   8  14 415.151 107.286   1
   0   8  15 2500.40 625.826   1
   0   8  1618010.10 4226.31   1
   0   8  17 1304.27 403.772   1
   0   8  18 649.159 249.544   1
   0   9   0 -38.286 170.033   1
   0   9   154828.80 3485.37   1
   0   9   2118599.0 2621.09   1
   0   9   3  744.06 152.665   1
   0   9   4 4751.07 1059.27   1
   0   9   5221975.0 5233.60   1
   0   9   6 6484.64 1202.60   1
   0   9   781443.70 1799.78   1
   0   9   864133.20 1570.59   1
   0   9   971135.50 1667.83   1
   0   9  10 1138.49 258.578   1
   0   9  11 4657.12 1107.80   1
   0   9  1219241.40 3104.22   1
   0   9  1317147.30 4625.25   1
   0   9  1410660.50 2097.96   1
   0   9  15 597.754 172.895   1
   0   9  16 2130.66 597.952   1
   0   9  17 324.818 101.623   1
   0   9  1821888.70 4828.33   1
   0  10   0254084.0 7094.26   1
   0  10   117694.30 2730.56   1
   0  10   2  75.513 50.1023   1
   0  10   311140.20 1917.28   1
   0  10   457482.10 2495.97   1
   0  10   520113.20 2872.32   1
   0  10   6154632.0 3411.56   1
   0  10   712551.80 2153.26   1
   0  10   825507.50 3138.61   1
   0  10   9 7949.46 1770.02   1
   0  10  1025093.20 3395.46   1
   0  10  1114778.60 2877.49   1
   0  10  1221220.00 4308.22   1
   0  10  1314838.20 2739.49   1
   0  10  14 7356.03 1736.21   1
   0  10  1510373.00 2193.32   1
   0  10  16 5314.86 1282.29   1
   0  10  17 2717.84 637.612   1
   0  11   0 7.60873 74.9299   1
   0  11   110737.90 1828.09   1
   0  11   2 6261.54 1148.61   1
   0  11   380344.50 1775.90   1
   0  11   4 1471.72 296.087   1
   0  11   5 5181.43 991.331   1
   0  11   645192.20 2980.75   1
   0  11   7106744.0 2344.05   1
   0  11   8127420.0 3244.90   1
   0  11   9244754.0 7043.53   1
   0  11  10 9709.21 1902.75   1
   0  11  11 9185.07 2438.72   1
   0  11  12 7122.41 1691.19   1
   0  11  13 3760.19 863.692   1
   0  11  1418882.50 3396.78   1
   0  11  1519429.90 3688.18   1
   0  11  16 479.092 194.259   1
   0  12   0 4898.25 1378.12   1
   0  12   160016.90 1878.48   1
   0  12   2 139.368 83.9315   1
   0  12   3 9755.36 1684.62   1
   0  12   4 600.827 111.564   1
   0  12   520968.00 3161.01   1
   0  12   6  102.15 104.813   1
   0  12   785755.80 2017.75   1
   0  12   8 6280.41 1144.96   1
   0  12   999977.80 2699.88   1
   0  12  10 792.969  227.59   1
   0  12  1115960.80 3777.58   1
   0  12  12 3330.94  732.11   1
   0  12  13  600.67 166.104   1
   0  12  14 416.798 100.162   1
   0  12  1537285.50 5066.33   1
   0  12  16 4025.71 1163.91   1
   0  13   0 187.263 64.8985   1
   0  13   136197.20 3565.24   1
   0  13   242308.50 3362.94   1
   0  13   3111765.0 2454.99   1
   0  13   411430.00 2147.11   1
   0  13   515262.60 2429.92   1
   0  13   6 6330.90 1281.20   1
   0  13   714430.20 2531.77   1
   0  13   8 756.657 172.801   1
   0  13   928022.20 4793.91   1
   0  13  10 311.137 120.746   1
   0  13  11 497.445 116.853   1
   0  13  12 1868.02  544.24   1
   0  13  13 3473.53 886.716   1
   0  13  14 1712.70 822.924   1
   0  13  15  358.97 124.041   1
   0  14   062307.30 2900.32   1
   0  14   128947.20 4564.53   1
   0  14   218399.90 2930.00   1
   0  14   357500.40 2030.43   1
   0  14   4 1247.82  389.35   1
   0  14   545812.80 3859.86   1
   0  14   641834.10 5265.17   1
   0  14   713446.00 3247.13   1
   0  14   8 8496.10 1766.78   1
   0  14   915417.60 3527.26   1
   0  14  1054174.30 2589.38   1
   0  14  11 5781.45 1400.51   1
   0  14  12 374.489 201.665   1
   0  14  13 422.309 245.892   1
   0  14  14 2032.91  668.71   1
   0  15   0 186.913 159.132   1
   0  15   1  613.89 146.646   1
   0  15   247567.30 2980.13   1
   0  15   3 285.693 180.834   1
   0  15   4 221.635 98.0379   1
   0  15   532625.00 3759.92   1
   0  15   6 273.538 72.7377   1
   0  15   710067.90 2066.40   1
   0  15   845945.10 3171.09   1
   0  15   9 2805.58 776.508   1
   0  15  10 2839.89  721.92   1
   0  15  1138198.50 4826.39   1
   0  15  12 3833.82 1081.06   1
   0  15  1310878.20 2898.17   1
   0  16   0131490.0 2839.30   1
   0  16   1 133.803 115.715   1
   0  16   2 7520.18 1474.52   1
   0  16   325689.80 3725.86   1
   0  16   4 1562.84 311.671   1
   0  16   5 5900.41 1184.22   1
   0  16   6 2594.72 604.297   1
   0  16   731605.80 4138.66   1
   0  16   8 1253.23 316.161   1
   0  16   9 252.562 71.2528   1
   0  16  10 1673.13 364.123   1
   0  16  11 3010.55 1040.48   1
   0  16  12 2420.03 848.731   1
   0  17   0 -73.399 188.236   1
   0  17   1 5397.80 1144.13   1
   0  17   2 5422.65 1278.34   1
   0  17   3 818.213 201.209   1
   0  17   4 7302.64 1707.08   1
   0  17   551140.30 3144.06   1
   0  17   621399.40 3432.20   1
   0  17   7 56.6649 140.192   1
   0  17   8 7405.13 1660.90   1
   0  17   9 96.8087 139.211   1
   0  17  10 658.366 252.422   1
   0  18   0 1003.16  334.25   1
   0  18   1 8504.47 1827.93   1
   0  18   224742.30 3636.76   1
   0  18   316037.00 2928.78   1
   0  18   416025.30 2981.40   1
   0  18   5 276.199 200.305   1
   0  18   6 4315.45  996.63   1
   0  18   710361.00 2309.02   1
   0  18   8 668.101 210.288   1
   0  19   0 254.084 162.854   1
   0  19   1 4326.10 1045.81   1
   0  19   2 2002.06 546.599   1
   0  19   3  406.37 109.824   1
   0  19   417069.60 3277.81   1
   0  19   5  218.52 60.4335   1
   0  19   618553.20 4764.27   1
   1   0   0 92.2157 30.4351   1
   1   0   2 76.2706 23.4225   1
   1   0   3 8280.98 2504.30   1
   1   0   4 183.852  67.654   1
   1   0   5134822.0 2971.17   1
   1   0   6-129.456 165.985   1
   1   0   7148805.0148805.0   1
   1   0   8 405.563 214.762   1
   1   0   9345436.011345.80   1
   1   0  10-47.1861  135.89   1
   1   0  1175770.00 2556.93   1
   1   0  12  192.86 159.509   1
   1   0  13 7024.23 2210.82   1
   1   0  14 228.712 128.784   1
   1   0  1545064.90 4847.15   1
   1   0  16 385.169 385.191   1
   1   0  17 8667.54 2924.64   1
   1   0  18-332.788 505.285   1
   1   0  1932435.30 7089.11   1
   1   0  20 69.8551 229.727   1
   1   1   0 126.793 30.7628   1
   1   1   1111552.0 7345.49   1
   1   1   2255997.0 6317.55   1
   1   1   329412.70 7135.07   1
   1   1   4281906.0 6226.89   1
   1   1   524329.80 4062.68   1
   1   1   6-89.5796 93.0981   1
   1   1   780837.30 3389.42   1
   1   1   873134.00 2563.39   1
   1   1   9249772.0 6297.67   1
   1   1  10 1402.38 284.135   1
   1   1  1143758.50 3288.45   1
   1   1  12 7864.54 1498.26   1
   1   1  13 4519.55 1489.03   1
   1   1  1418786.80 3327.29   1
   1   1  1519318.40 3469.19   1
   1   1  16 615.301  260.13   1
   1   1  1723951.70 4131.71   1
   1   1  18 8703.98 2157.43   1
   1   1  1939045.20 4960.27   1
   1   1  20 229.596 135.371   1
   1   2   078311.20 7371.48   1
   1   2   141604.80 6086.38   1
   1   2   2236586.0 5238.25   1
   1   2   318730.50 3806.94   1
   1   2   4124077.0 2767.87   1
   1   2   559732.10 5850.33   1
   1   2   6192535.0 4507.84   1
   1   2   7102459.0 3701.46   1
   1   2   818717.60 2887.95   1
   1   2   9230238.0 5264.98   1
   1   2  10114047.0 3076.29   1
   1   2  11168308.0 3774.59   1
   1   2  1213242.80 2353.02   1
   1   2  13 1988.36 685.524   1
   1   2  1416615.50 2776.91   1
   1   2  1542351.20 3714.79   1
   1   2  1662645.10 1601.93   1
   1   2  17 573.592 145.535   1
   1   2  18 1589.68 454.499   1
   1   2  19 119.618 143.616   1
   1   2  2015338.30 3895.96   1
   1   3   028715.10 5068.09   1
   1   3   181417.60 7005.97   1
   1   3   2438345.0120822.0   1
   1   3   342914.30 6001.82   1
   1   3   4368642.010907.50   1
   1   3   5245628.0 5725.33   1
   1   3   663332.90 5457.04   1
   1   3   7123099.0 2723.25   1
   1   3   895278.70 2559.46   1
   1   3   911921.30 2078.98   1
   1   3  10 3437.66 708.103   1
   1   3  11 3297.11 638.909   1
   1   3  12 1171.20 300.793   1
   1   3  13 4497.71 1486.89   1
   1   3  1416119.30 2737.85   1
   1   3  15 1296.90 344.763   1
   1   3  16 1857.85 611.136   1
   1   3  17 3728.12 975.133   1
   1   3  1857429.50 2676.13   1
   1   3  19 1371.90 384.544   1
   1   4   0176679.0 3915.36   1
   1   4   120516.20 4617.11   1
   1   4   243009.40 6379.17   1
   1   4   3434703.064745.90   1
   1   4   473257.50 4904.67   1
   1   4   510401.70 1869.01   1
   1   4   6263695.0263695.0   1
   1   4   7317011.0 7115.15   1
   1   4   8 491.939 106.312   1
   1   4   9 9627.26 1736.30   1
   1   4  10 3273.68 637.245   1
   1   4  1146485.90 3022.63   1
   1   4  12 5667.96 1302.82   1
   1   4  13159919.0 3511.97   1
   1   4  14 4841.13 1046.23   1
   1   4  15 2795.26 996.763   1
   1   4  1619685.30 4188.30   1
   1   4  17 4675.98 1178.25   1
   1   4  18 305.782 81.7383   1
   1   4  1930666.10 5213.48   1
   1   5   0363455.0 9191.84   1
   1   5   1111549.0 2500.29   1
   1   5   296590.70 3225.91   1
   1   5   371189.90 4833.17   1
   1   5   4112981.0 2496.08   1
   1   5   611580.30 2352.24   1
   1   5   716907.90 2822.65   1
   1   5   8 2514.60 524.712   1
   1   5   9 636.345 140.896   1
   1   5  1013508.30 2219.70   1
   1   5  11216266.0 4669.89   1
   1   5  1210605.00 2244.47   1
   1   5  13 6398.42 1459.63   1
   1   5  14 6770.98 1417.08   1
   1   5  15 7995.17 2616.39   1
   1   5  16 6431.70 1956.88   1
   1   5  17 1236.76 384.348   1
   1   5  1817112.90 3776.77   1
   1   5  19 855.843 270.756   1
   1   6   048738.10 5463.37   1
   1   6   1 8661.07 1805.05   1
   1   6   228296.60 4426.73   1
   1   6   3152387.0 3333.38   1
   1   6   525193.50 4145.39   1
   1   6   6 661.395 138.223   1
   1   6   750344.60 3574.96   1
   1   6   8 502.742 108.965   1
   1   6   9 5408.23 1027.26   1
   1   6  10 860.085 175.549   1
   1   6  11 1053.18 208.925   1
   1   6  1280486.90 1756.55   1
   1   6  13147567.0 3245.77   1
   1   6  1451478.60 2850.93   1
   1   6  15 185.146 118.975   1
   1   6  16 1945.95  543.79   1
   1   6  17 1306.27 361.775   1
   1   6  18 3013.67 872.886   1
   1   6  1928766.60 5339.44   1
   1   7   013764.90 3593.27   1
   1   7   1 120.965 169.944   1
   1   7   2 3060.23  766.12   1
   1   7   3 1426.83 386.951   1
   1   7   4299678.0299678.0   1
   1   7   516064.20 2727.18   1
   1   7   6201816.0 4558.80   1
   1   7   754628.00 3593.97   1
   1   7   858338.60 2424.73   1
   1   7   918873.60 2809.12   1
   1   7  1064650.50 1617.13   1
   1   7  11 150.437 131.965   1
   1   7  1223387.00 3366.07   1
   1   7  1329149.30 3567.00   1
   1   7  1456851.10 2759.18   1
   1   7  15 8834.82 2398.08   1
   1   7  1614688.70 3093.16   1
   1   7  17 147.137 182.788   1
   1   7  18 659.563 332.491   1
   1   8   020071.70 3242.61   1
   1   8   131203.00 4949.87   1
   1   8   244429.10 4551.93   1
   1   8   313196.60 2843.15   1
   1   8   428132.20 3675.19   1
   1   8   5 4354.97 764.127   1
   1   8   6122507.0 2705.03   1
   1   8   730707.80 3459.87   1
   1   8   8 79.8595 18.8228   1
   1   8   910123.60 1750.63   1
   1   8  1041512.60 3793.47   1
   1   8  1113781.00 3190.86   1
   1   8  1258515.40 1896.85   1
   1   8  13 2585.52 662.983   1
   1   8  1492273.30 2341.59   1
   1   8  1518305.60 3215.71   1
   1   8  16 159.794 88.9559   1
   1   8  17 7586.45 2019.42   1
   1   8  18 6621.71 1899.42   1
   1   9   059482.90 3358.42   1
   1   9   1265719.0 5812.32   1
   1   9   2130021.0 3394.59   1
   1   9   3 9962.03 1739.58   1
   1   9   4178760.0 4005.17   1
   1   9   5 5923.11 1138.75   1
   1   9   6176511.0 3878.28   1
   1   9   710430.10 1957.31   1
   1   9   816840.60 2807.01   1
   1   9   932299.90 3647.59   1
   1   9  1015841.50 3022.21   1
   1   9  1141402.60 4274.81   1
   1   9  1218084.80 3370.14   1
   1   9  13 151.094 45.6331   1
   1   9  1418933.10 3242.05   1
   1   9  1515461.50 2931.56   1
   1   9  16 868.697  243.61   1
   1   9  17 3610.02 1059.29   1
   1  10   0176585.0 4183.88   1
   1  10   1 3210.68 660.372   1
   1  10   287771.50 2105.00   1
   1  10   3143468.0 3921.07   1
   1  10   424157.30 3156.35   1
   1  10   5 8967.51 1580.46   1
   1  10   631195.80 3406.32   1
   1  10   712103.00 2034.33   1
   1  10   815256.70 2392.26   1
   1  10   9 2560.48 471.832   1
   1  10  1035089.10 5598.50   1
   1  10  1112424.50 2230.32   1
   1  10  1221670.40 3722.08   1
   1  10  1333232.90 4906.54   1
   1  10  1423945.00 4153.84   1
   1  10  1512647.70 2609.58   1
   1  10  1616777.00 3411.19   1
   1  10  17 2413.28 846.859   1
   1  11   010555.30 1771.85   1
   1  11   1 1532.98 323.305   1
   1  11   2118600.0 2975.16   1
   1  11   310277.50 1727.54   1
   1  11   4 1048.83 231.193   1
   1  11   511634.00 1920.18   1
   1  11   622644.20 3008.91   1
   1  11   7 7374.25 1597.61   1
   1  11   8112752.0 2478.06   1
   1  11   9 774.426 774.448   1
   1  11  10 241.277  110.93   1
   1  11  1188717.40 2197.08   1
   1  11  12 7087.28 1671.25   1
   1  11  13 2643.88 689.623   1
   1  11  14 148.408 146.396   1
   1  11  15 7312.09 1793.44   1
   1  11  16 172.725 131.661   1
   1  12   0162298.0 3587.42   1
   1  12   1 6914.13 1240.71   1
   1  12   2 358.719  93.873   1
   1  12   322521.80 2903.46   1
   1  12   459207.60 1875.76   1
   1  12   5 3395.03 708.546   1
   1  12   699725.30 2239.58   1
   1  12   7 282.475 59.1488   1
   1  12   8 1575.12 422.733   1
   1  12   9 121.305  100.20   1
   1  12  1040521.40 3936.93   1
   1  12  11 7706.56 2187.67   1
   1  12  12 459.762 269.013   1
   1  12  13 2818.95 671.828   1
   1  12  14 2998.24 757.503   1
   1  12  15 809.532 275.879   1
   1  12  1651293.10 4010.31   1
   1  13   0 18.7902 181.015   1
   1  13   111844.20 2128.23   1
   1  13   2165260.0 3859.97   1
   1  13   3 252.555 68.2946   1
   1  13   4 30.3059 71.7653   1
   1  13   5 3866.31 919.819   1
   1  13   6 7336.64 1672.40   1
   1  13   7 3116.12 778.529   1
   1  13   837612.10 3599.81   1
   1  13   938171.80 4615.18   1
   1  13  10 1420.55 311.006   1
   1  13  11 246.926 113.655   1
   1  13  12 512.485 176.472   1
   1  13  13 334.081 201.826   1
   1  13  14 2121.47 631.923   1
   1  13  15 3033.73 810.546   1
   1  14   047987.50 2881.33   1
   1  14   1 4508.48 1138.60   1
   1  14   2 575.251 174.342   1
   1  14   310720.70 2032.95   1
   1  14   411748.10 2032.98   1
   1  14   5 1859.46  408.02   1
   1  14   620108.00 3211.33   1
   1  14   716088.80 3177.54   1
   1  14   8 906.118 237.432   1
   1  14   955148.50 2854.21   1
   1  14  1010419.10 2185.94   1
   1  14  1124218.50 3950.82   1
   1  14  12 270.254 95.1525   1
   1  14  1319174.60 3858.63   1
   1  14  14 4609.82 1194.25   1
   1  15   0 543.978 121.359   1
   1  15   1 7711.67 1446.40   1
   1  15   2 422.128 126.382   1
   1  15   3 1639.77 425.859   1
   1  15   4 7101.16 1658.24   1
   1  15   5 1247.39 280.373   1
   1  15   6 5059.47 1258.24   1
   1  15   713734.20 2978.55   1
   1  15   8 591.846 173.336   1
   1  15   919142.10 3477.11   1
   1  15  10 2914.06 687.809   1
   1  15  11 7603.36 1817.65   1
   1  15  12 5856.24 1522.58   1
   1  15  13 675.199 263.241   1
   1  16   0 5836.62 1564.31   1
   1  16   126230.40 4095.73   1
   1  16   219507.90 3002.65   1
   1  16   3 1059.43 231.733   1
   1  16   418465.20 3160.50   1
   1  16   5 174.947 77.2705   1
   1  16   628257.80 3590.20   1
   1  16   7 1065.00 282.232   1
   1  16   812287.50 2630.44   1
   1  16   921505.30 4006.18   1
   1  16  10 715.244 220.916   1
   1  16  11 2124.70 700.367   1
   1  17   0 271.474 97.0289   1
   1  17   1 449.006 110.578   1
   1  17   232699.30 3733.35   1
   1  17   3 7060.79 1482.67   1
   1  17   436565.20 4080.56   1
   1  17   521891.90 3804.22   1
   1  17   6 4691.92 1049.56   1
   1  17   712891.60 2769.98   1
   1  17   8 4236.20 1047.70   1
   1  17   9 2011.16 603.491   1
   1  17  1014606.00 3452.36   1
   1  18   0 260.004 87.1988   1
   1  18   1 292.386 77.6607   1
   1  18   213636.00 2744.08   1
   1  18   321168.40 3704.98   1
   1  18   4 871.317 202.437   1
   1  18   5 63.7004 43.3075   1
   1  18   621267.10 3968.17   1
   1  18   7 4504.24 1085.98   1
   1  18   8 856.792 293.227   1
   1  19   0 3456.63 822.464   1
   1  19   1 2617.75 724.709   1
   1  19   2 282.994 176.086   1
   1  19   3 2742.78 763.628   1
   1  19   4 231.484 71.9533   1
   1  19   542679.50 5260.86   1
   2   0   014255.30 3634.82   1
   2   0   1-32.2104 106.481   1
   2   0   2 6329.35 1896.30   1
   2   0   3-61.4137 93.3794   1
   2   0   4130402.0 3855.51   1
   2   0   5-38.8034 128.613   1
   2   0   6 9802.48 3372.05   1
   2   0   7 339.959 82.3552   1
   2   0   851171.20 4622.10   1
   2   0   9-5.75321 209.977   1
   2   0  10363031.0363031.0   1
   2   0  11  73.405   44.40   1
   2   0  12 410.189 144.593   1
   2   0  13 249.229 88.8893   1
   2   0  1439495.70 5378.28   1
   2   0  15 132.842 293.474   1
   2   0  1683686.00 1807.06   1
   2   0  17 154.823 83.5179   1
   2   0  1820070.20 5752.00   1
   2   0  19 1540.48 1455.26   1
   2   1   0525571.0377852.0   1
   2   1   375986.90 6162.24   1
   2   1   4 4128.92 834.575   1
   2   1   585026.10 3574.15   1
   2   1   6 3993.73 1482.73   1
   2   1   7 5685.87 1138.47   1
   2   1   8507196.0130314.0   1
   2   1   9 5900.58 1064.15   1
   2   1  10  80.794 48.6004   1
   2   1  1128708.20 3343.08   1
   2   1  1240553.60 5393.23   1
   2   1  13 6661.44 1532.83   1
   2   1  14 1383.08 315.895   1
   2   1  15 4125.93 4125.97   1
   2   1  1611345.80 2486.01   1
   2   1  1716019.20 3366.67   1
   2   1  1836947.00 4785.23   1
   2   1  19 463.228 149.238   1
   2   2   0188723.0 4183.52   1
   2   2   1150281.0 3330.74   1
   2   2   291501.10 4921.21   1
   2   2   374835.30 5419.51   1
   2   2   4 7641.11 1834.10   1
   2   2   545735.60 6378.28   1
   2   2   6 102.432 123.837   1
   2   2   720985.00 3596.93   1
   2   2   8 2212.09 519.713   1
   2   2   9149662.0 3466.63   1
   2   2  1063000.60 2060.77   1
   2   2  11139006.0 3060.49   1
   2   2  1214300.50 2499.55   1
   2   2  1318473.10 3304.64   1
   2   2  1422793.20 3767.11   1
   2   2  15 9882.97 9883.00   1
   2   2  16 6844.66 1650.88   1
   2   2  1759139.40 2173.70   1
   2   2  18 258.124 140.201   1
   2   2  19 9399.60 2494.85   1
   2   3   036390.00 5606.18   1
   2   3   1368045.016841.80   1
   2   3   2 7589.23 1636.48   1
   2   3   347562.60 5500.00   1
   2   3   473844.00 4183.78   1
   2   3   5 7187.54 2151.99   1
   2   3   6 8372.08 2028.64   1
   2   3   750231.90 4341.04   1
   2   3   821774.30 3478.82   1
   2   3   9 5828.21 1218.88   1
   2   3  10 1621.41 359.853   1
   2   3  11 6632.99 1635.63   1
   2   3  1218914.60 3752.98   1
   2   3  13 4421.64 933.015   1
   2   3  1458833.00 1825.14   1
   2   3  1610109.50 2308.92   1
   2   3  1779539.30 1748.45   1
   2   3  18 4596.18 1288.14   1
   2   3  19 7091.62 1949.74   1
   2   4   0 753.248 154.462   1
   2   4   1123034.0 2713.79   1
   2   4   2190365.0 4216.61   1
   2   4   3 567.604  132.21   1
   2   4   414681.20 2977.30   1
   2   4   524072.00 3801.30   1
   2   4   643884.90 4702.88   1
   2   4   716223.30 2944.74   1
   2   4   834995.60 4093.45   1
   2   4   973533.50 1779.66   1
   2   4  1012457.70 2221.02   1
   2   4  11115103.0 2630.50   1
   2   4  12180304.0180304.0   1
   2   4  13 2023.14 441.689   1
   2   4  14106497.0 2636.22   1
   2   4  1516937.30 4638.43   1
   2   4  16 3396.07 889.543   1
   2   4  1710832.90 2620.43   1
   2   4  18 732.451 245.717   1
   2   4  19 2512.65 764.684   1
   2   5   030483.10 4393.97   1
   2   5   1104073.0 2299.14   1
   2   5   2 5535.31 1195.39   1
   2   5   373875.60 4981.80   1
   2   5   471097.00 3705.73   1
   2   5   5171122.0 3778.45   1
   2   5   6238862.0 5225.07   1
   2   5   746604.70 3705.64   1
   2   5   855604.40 3135.06   1
   2   5   9 11.9601 41.4845   1
   2   5  1043138.20 3536.00   1
   2   5  11 4305.36  915.35   1
   2   5  1280784.80 2262.09   1
   2   5  13 5027.94 1074.42   1
   2   5  1467585.30 1589.88   1
   2   5  15 135.553 209.269   1
   2   5  1620871.00 3916.47   1
   2   5  17 1479.33 444.342   1
   2   5  18 964.109 276.731   1
   2   5  19 9887.27 2688.89   1
   2   6   0 816.276 292.637   1
   2   6   1 4091.94 1250.18   1
   2   6   2173085.0 3808.54   1
   2   6   3286277.0 6668.00   1
   2   6   481696.50 2173.63   1
   2   6   5 181.463 60.5168   1
   2   6   6 677.801 140.012   1
   2   6   748761.10 3402.56   1
   2   6   8 3980.61 778.428   1
   2   6   9 1599.64 345.367   1
   2   6  10 6580.75 1343.91   1
   2   6  11 4875.56 1314.95   1
   2   6  1238101.70 4416.71   1
   2   6  1359236.60 1682.97   1
   2   6  14 6462.67 1813.47   1
   2   6  15 4692.54 1178.97   1
   2   6  16 2175.95 641.884   1
   2   6  17 3362.68 946.448   1
   2   6  18 1400.29  410.22   1
   2   7   0 5516.23 1080.92   1
   2   7   1 8944.31 1730.11   1
   2   7   217368.80 2954.36   1
   2   7   320443.80 3531.89   1
   2   7   4 316.924 113.121   1
   2   7   5388451.014527.20   1
   2   7   616212.20 2609.58   1
   2   7   7 6301.52 1155.98   1
   2   7   813358.80 2171.36   1
   2   7   9 995.012 241.089   1
   2   7  1039992.80 3408.41   1
   2   7  11 9725.26 2110.92   1
   2   7  12 4306.34 903.649   1
   2   7  13 1745.33 530.482   1
   2   7  1415469.80 4399.77   1
   2   7  1548334.10 3937.80   1
   2   7  16 6543.06 1703.90   1
   2   7  17 4509.85 1268.00   1
   2   7  18 4205.10 1297.95   1
   2   8   011978.00 2156.11   1
   2   8   110869.20 2175.59   1
   2   8   2 3243.21 682.207   1
   2   8   3403578.0 8865.47   1
   2   8   4 8351.05 1660.92   1
   2   8   569555.10 1800.44   1
   2   8   6 123.481 76.3626   1
   2   8   7167476.0 4922.05   1
   2   8   8  886.58 201.611   1
   2   8   9 6620.80 1345.62   1
   2   8  1030942.20 4643.89   1
   2   8  11 2931.83 744.071   1
   2   8  12 4489.69 991.351   1
   2   8  1373176.60 2520.90   1
   2   8  14 433.952 129.518   1
   2   8  15 3281.10  782.30   1
   2   8  16 9991.88 2390.68   1
   2   8  17 -139.36 257.654   1
   2   8  18 1361.19 463.566   1
   2   9   052899.90 3573.73   1
   2   9   1 4032.72 788.051   1
   2   9   2108551.0 2501.34   1
   2   9   3 4358.83 950.069   1
   2   9   4 329.787 84.2734   1
   2   9   5134091.0 3868.56   1
   2   9   632396.20 3353.80   1
   2   9   7 860.285 168.666   1
   2   9   8196498.0 6715.69   1
   2   9   9 1113.10 346.352   1
   2   9  1010259.20 2219.30   1
   2   9  11 9908.76 1936.98   1
   2   9  1234369.60 5784.76   1
   2   9  13 5095.25 1281.22   1
   2   9  14 8808.31 1897.97   1
   2   9  15 6275.37 1544.67   1
   2   9  16 344.308 139.069   1
   2   9  17 185.904 237.865   1
   2  10   087306.10 2230.42   1
   2  10   183184.50 1835.59   1
   2  10   2 1387.78 303.909   1
   2  10   3 137.719 35.3026   1
   2  10   434846.20 3410.73   1
   2  10   5 457.973 100.193   1
   2  10   6 6132.61 1131.26   1
   2  10   712441.70 2194.41   1
   2  10   8 527.932 141.499   1
   2  10   9 8778.01 2329.92   1
   2  10  1028970.20 4614.46   1
   2  10  1187214.00 2657.56   1
   2  10  1213513.20 3352.76   1
   2  10  13 949.549 262.495   1
   2  10  14 4328.31 1040.68   1
   2  10  1518013.00 3968.42   1
   2  10  1631974.80 5186.43   1
   2  11   0 5723.93 1076.48   1
   2  11   1223328.0 5518.02   1
   2  11   216887.60 2445.01   1
   2  11   351044.00 2877.33   1
   2  11   446963.00 3202.33   1
   2  11   5 7232.16 1323.01   1
   2  11   610551.20 1710.27   1
   2  11   7119975.0 6295.24   1
   2  11   821653.40 3128.27   1
   2  11   9 3697.60  889.09   1
   2  11  1010395.10 2077.47   1
   2  11  1114077.20 3333.11   1
   2  11  1231407.70 4308.06   1
   2  11  13 8541.93 2083.35   1
   2  11  14 4128.61 999.803   1
   2  11  15 1480.22 409.276   1
   2  11  16 460.724 167.493   1
   2  12   018101.40 2631.48   1
   2  12   185170.70 1950.91   1
   2  12   2 2148.26 411.446   1
   2  12   369904.40 1992.80   1
   2  12   4 9622.61 1812.26   1
   2  12   5 282.695 87.9546   1
   2  12   6 3415.02 878.709   1
   2  12   7 1037.82 239.527   1
   2  12   8 1137.34 393.559   1
   2  12   971828.80 2127.81   1
   2  12  10 5016.77 1385.15   1
   2  12  1139734.30 4806.03   1
   2  12  12 932.473 258.206   1
   2  12  13 3890.20 940.227   1
   2  12  14 483.853 157.415   1
   2  12  1513580.90 3006.94   1
   2  13   011715.80 2148.36   1
   2  13   137551.80 3887.11   1
   2  13   222450.10 3218.72   1
   2  13   346154.60 3036.68   1
   2  13   4 1387.91 273.687   1
   2  13   521293.00 3255.40   1
   2  13   6 4016.41 789.456   1
   2  13   7132645.0 3673.71   1
   2  13   8100077.0 2253.31   1
   2  13   925617.90 5781.92   1
   2  13  10-24.6932   12.41   1
   2  13  11 3749.24 901.571   1
   2  13  12 64.4802 113.509   1
   2  13  13 454.075 175.573   1
   2  13  14 1449.93 421.962   1
   2  14   071458.50 1576.37   1
   2  14   1 348.358 101.025   1
   2  14   2  741.68 153.278   1
   2  14   3 345.717 171.947   1
   2  14   476571.90 2094.03   1
   2  14   5 114.072 85.2043   1
   2  14   612192.00 2612.41   1
   2  14   7 4104.55 1271.50   1
   2  14   8 120.225 117.768   1
   2  14   937792.70 4440.87   1
   2  14  1031159.90 4557.19   1
   2  14  1123240.40 3822.72   1
   2  14  12 2144.56 521.006   1
   2  14  13 8117.33 1935.59   1
   2  15   0 1357.79 350.243   1
   2  15   114676.10 2997.51   1
   2  15   255827.90 2301.27   1
   2  15   353591.60 2393.80   1
   2  15   4 1791.35 550.013   1
   2  15   565350.30 3202.03   1
   2  15   6 522.427 165.124   1
   2  15   7 1103.12 249.504   1
   2  15   835906.50 4059.87   1
   2  15   9 607.684 168.093   1
   2  15  10  648.64 177.673   1
   2  15  11 1076.10 596.057   1
   2  15  12 3467.27 910.935   1
   2  16   010649.00 2413.92   1
   2  16   1 198.051 151.421   1
   2  16   2 60.9203 146.851   1
   2  16   327134.30 3796.55   1
   2  16   428265.70 3585.31   1
   2  16   5 3955.10 831.333   1
   2  16   6 250.016 97.6407   1
   2  16   735652.10 4646.66   1
   2  16   8 1392.68 343.074   1
   2  16   9  385.23  162.51   1
   2  16  1015450.40 3365.92   1
   2  16  11 776.544 194.616   1
   2  17   0 1300.46 327.909   1
   2  17   1 3700.77 883.631   1
   2  17   2 306.004  116.39   1
   2  17   3 31.0834 78.8056   1
   2  17   4 5713.20 1328.80   1
   2  17   529174.80 4743.41   1
   2  17   630597.90 4901.93   1
   2  17   7 1924.76  550.91   1
   2  17   8 5911.49 1674.45   1
   2  17   9 303.806 131.419   1
   2  18   0  327.01 103.005   1
   2  18   1 171.611 118.525   1
   2  18   2  380.69 108.941   1
   2  18   313936.10 2933.26   1
   2  18   4 120.585 111.693   1
   2  18   5 1680.76 511.587   1
   2  18   610895.50 2698.59   1
   2  18   7 9233.48 2499.51   1
   2  19   0 3087.99 943.408   1
   2  19   1 1941.40 409.904   1
   2  19   2 603.748 214.767   1
   2  19   3 1656.10 549.985   1
   2  19   430917.20 5386.95   1
   3   0   0  64.627 32.7475   1
   3   0   136797.30 7754.76   1
   3   0   2 3.20674 38.4656   1
   3   0   363067.40 7100.79   1
   3   0   4 272.655  84.839   1
   3   0   5 3742.97 1079.40   1
   3   0   6 142.575 67.9216   1
   3   0   7 1427.82 363.834   1
   3   0   8 63.9185 36.1053   1
   3   0   9216307.0 8715.48   1
   3   0  10 50.1357 138.169   1
   3   0  1117900.60 4528.61   1
   3   0  12 -22.374 22.5956   1
   3   0  13 634.741 387.846   1
   3   0  14-90.6326  47.572   1
   3   0  1517417.70 4742.47   1
   3   0  16 51.2949  213.43   1
   3   0  1735674.20 6578.55   1
   3   0  18  13.681 192.736   1
   3   0  1940780.60 7493.41   1
   3   1   010475.30 2107.69   1
   3   1   1479740.0119415.0   1
   3   1   2226588.0 5215.27   1
   3   1   3491363.0117180.0   1
   3   1   4 2306.15  484.15   1
   3   1   5 2696.68 633.005   1
   3   1   623817.00 3565.45   1
   3   1   7168749.0 4076.85   1
   3   1   819289.00 3155.09   1
   3   1   921549.10 3345.71   1
   3   1  10 4769.55 983.091   1
   3   1  1143238.30 3749.59   1
   3   1  1231229.90 5613.47   1
   3   1  13 4540.08 1065.61   1
   3   1  14 2690.99 680.817   1
   3   1  1518567.40 3473.13   1
   3   1  16 1476.22 416.881   1
   3   1  1713470.80 3067.81   1
   3   1  1811909.60 2960.19   1
   3   1  1928364.60 5256.26   1
   3   2   0354048.0 7825.22   1
   3   2   112028.80 2321.16   1
   3   2   250147.40 5481.37   1
   3   2   395567.30 2174.50   1
   3   2   4 1365.12 298.648   1
   3   2   5 225.879 77.3384   1
   3   2   6408162.0 9613.46   1
   3   2   730109.10 4093.75   1
   3   2   8 3657.24 793.408   1
   3   2   931676.00 3816.46   1
   3   2  1082224.90 2007.84   1
   3   2  1116776.60 3569.28   1
   3   2  12 1962.95 519.623   1
   3   2  1314840.90 2918.58   1
   3   2  1417790.50 3858.09   1
   3   2  15 6888.57 1616.91   1
   3   2  1641548.90 4157.56   1
   3   2  17 1104.13 309.001   1
   3   2  18 694.335 212.377   1
   3   2  1913885.90 3538.20   1
   3   3   0 1291.14 268.541   1
   3   3   1119580.0 2700.09   1
   3   3   2385637.0 8528.12   1
   3   3   3204151.0 4485.87   1
   3   3   4 265.796 56.2416   1
   3   3   569096.10 3032.92   1
   3   3   6 80.8032 20.3311   1
   3   3   7 4232.87 901.369   1
   3   3   8104840.0 2310.51   1
   3   3   9 149.726 100.988   1
   3   3  10 845.793 180.355   1
   3   3  1137960.10 4585.78   1
   3   3  1247523.60 3733.43   1
   3   3  13 9001.99 1986.24   1
   3   3  1419419.1019419.10   1
   3   3  1517948.50 3442.75   1
   3   3  1611285.90 2613.87   1
   3   3  17 6123.26 1648.04   1
   3   3  1825385.70 4915.72   1
   3   4   0196981.0 4324.33   1
   3   4   1 573.762 137.224   1
   3   4   218121.90 3928.76   1
   3   4   3117216.0 2583.46   1
   3   4   423101.20 3283.73   1
   3   4   5 5045.15 1037.00   1
   3   4   6 4103.43 1035.60   1
   3   4   7445059.0445059.0   1
   3   4   814692.60 2877.52   1
   3   4   9 1194.71 365.206   1
   3   4  10177765.0 4491.73   1
   3   4  1132264.90 5630.91   1
   3   4  12 2870.38 687.476   1
   3   4  1349590.50 3036.93   1
   3   4  14 3083.26 3083.28   1
   3   4  15 4218.44 1073.52   1
   3   4  1612886.10 2899.99   1
   3   4  17 434.861 146.854   1
   3   4  18 1033.57 350.304   1
   3   5   0109679.0 2708.33   1
   3   5   112043.80 2259.71   1
   3   5   224862.90 4153.73   1
   3   5   324957.40 4046.11   1
   3   5   462429.10 3896.02   1
   3   5   5548330.0548330.0   1
   3   5   610898.20 1789.42   1
   3   5   722434.60 3408.43   1
   3   5   828632.10 3712.15   1
   3   5   917999.90 2905.57   1
   3   5  10 403.218 89.9762   1
   3   5  1159742.60 2207.32   1
   3   5  12 232.685 89.4058   1
   3   5  1335012.70 4076.91   1
   3   5  14 9753.59 3103.89   1
   3   5  15104079.0 2340.10   1
   3   5  1615548.00 3258.57   1
   3   5  17 444.552 226.723   1
   3   5  18  200.10 63.6897   1
   3   6   0266482.0 5888.31   1
   3   6   150107.10 4199.68   1
   3   6   237763.80 4215.51   1
   3   6   335953.30 4496.44   1
   3   6   4 2245.56 471.785   1
   3   6   542139.60 4084.59   1
   3   6   6114709.0 2987.57   1
   3   6   7251882.0 6115.10   1
   3   6   8 282.101 63.8392   1
   3   6   9 3229.41 681.106   1
   3   6  10 2945.51  860.85   1
   3   6  1112829.30 2269.72   1
   3   6  1240695.80 3415.47   1
   3   6  1314686.60 3451.12   1
   3   6  1438238.10 4766.53   1
   3   6  15 1226.85 332.452   1
   3   6  1610983.70 2732.92   1
   3   6  17 176.544 155.927   1
   3   6  18  308.60 114.687   1
   3   7   021916.60 3696.25   1
   3   7   158673.90 3523.41   1
   3   7   229314.20 3749.15   1
   3   7   363258.00 2612.94   1
   3   7   4213893.0 5094.23   1
   3   7   5 4527.46 902.417   1
   3   7   643137.80 3402.36   1
   3   7   7 3204.88 665.324   1
   3   7   8 494.895  105.88   1
   3   7   913848.70 2674.39   1
   3   7  10  179.90 60.5517   1
   3   7  1128353.40 3969.91   1
   3   7  1213327.90 2414.47   1
   3   7  13 296.184 80.6757   1
   3   7  1459844.20 2012.58   1
   3   7  15 7562.83 1949.48   1
   3   7  1611866.40 2862.84   1
   3   7  17 1185.90 358.105   1
   3   8   064675.20 2363.94   1
   3   8   113996.20 2342.02   1
   3   8   257034.50 3392.87   1
   3   8   324655.70 3323.53   1
   3   8   4 3232.64  651.32   1
   3   8   5 757.478  162.04   1
   3   8   662469.20 1799.80   1
   3   8   7 2645.38 589.477   1
   3   8   853732.40 2487.04   1
   3   8   961033.10 1926.48   1
   3   8  10 382.474 177.259   1
   3   8  11 734.245 333.423   1
   3   8  12113169.0 4746.95   1
   3   8  13 1704.36 429.664   1
   3   8  1420966.20 3932.92   1
   3   8  15 175.508  147.79   1
   3   8  1618558.40 4626.40   1
   3   8  17 3918.07 1197.11   1
   3   9   012650.80 2282.17   1
   3   9   120263.40 2936.09   1
   3   9   2 142.604  64.487   1
   3   9   368524.70 1679.81   1
   3   9   431578.30 4161.81   1
   3   9   568969.90 2016.93   1
   3   9   6 2673.09 529.327   1
   3   9   773931.60 2035.14   1
   3   9   8  355.59 88.9305   1
   3   9   928600.50 3557.20   1
   3   9  10 6107.76 1258.62   1
   3   9  1144858.00 3976.98   1
   3   9  12 8522.64 2792.97   1
   3   9  13 558.569 136.983   1
   3   9  1430922.50 4577.48   1
   3   9  1511845.90 2912.52   1
   3   9  1617362.00 4019.58   1
   3  10   032881.60 3386.84   1
   3  10   1 9955.35 1745.06   1
   3  10   233515.40 3396.58   1
   3  10   344521.00 4321.33   1
   3  10   410243.00 1764.40   1
   3  10   5 1991.08 446.666   1
   3  10   6 747.532 233.555   1
   3  10   729219.10 3971.15   1
   3  10   8 1337.36 472.529   1
   3  10   924841.80 3833.12   1
   3  10  1052239.50 2711.74   1
   3  10  11 1874.26 690.352   1
   3  10  1213462.30 2617.19   1
   3  10  1318261.70 3682.12   1
   3  10  14 2471.74  621.73   1
   3  10  15 3280.94  962.53   1
   3  10  16 928.725 320.352   1
   3  11   030259.90 3309.92   1
   3  11   1 9054.83 1733.85   1
   3  11   274432.00 1634.82   1
   3  11   313538.80 2392.26   1
   3  11   411315.00 2699.02   1
   3  11   560896.70 2477.07   1
   3  11   6 5367.46 1284.42   1
   3  11   7 322.574 108.073   1
   3  11   876573.20 2274.44   1
   3  11   927177.40 3545.02   1
   3  11  10 2751.51 759.097   1
   3  11  11 4980.72 1123.93   1
   3  11  1226811.30 5046.47   1
   3  11  13 1758.08 532.283   1
   3  11  14 269.433 85.6466   1
   3  11  15 2614.50 777.704   1
   3  12   0172331.011661.30   1
   3  12   1 499.739  216.54   1
   3  12   2-62.4716 280.023   1
   3  12   3 4724.66  911.75   1
   3  12   4 5808.29 1071.98   1
   3  12   5 1528.45 320.593   1
   3  12   6 159.046 89.1026   1
   3  12   739603.30 3927.06   1
   3  12   820915.70 3593.21   1
   3  12   9 5512.19 1585.91   1
   3  12  10119189.0 3722.65   1
   3  12  11 4651.41 1060.47   1
   3  12  12 60.6522 66.7665   1
   3  12  13 2951.15 715.761   1
   3  12  14 810.349 225.237   1
   3  13   0 7459.60 1549.92   1
   3  13   121064.10 2940.88   1
   3  13   253016.90 2240.86   1
   3  13   3 4897.58 925.863   1
   3  13   4 1170.61  252.92   1
   3  13   526275.60 3604.78   1
   3  13   6 4020.11 915.462   1
   3  13   7 5669.21 1945.68   1
   3  13   857205.60 2834.00   1
   3  13   911292.10 2272.42   1
   3  13  10 937.436 209.896   1
   3  13  11 6346.52 1718.24   1
   3  13  1221803.90 4020.26   1
   3  13  13 530.868 173.647   1
   3  14   022590.80 3384.57   1
   3  14   143898.10 3627.81   1
   3  14   2 5099.22 1159.23   1
   3  14   321174.90 5168.80   1
   3  14   4 441.914 119.803   1
   3  14   5 293.594 75.3181   1
   3  14   6 124.428 122.316   1
   3  14   7 3344.09  871.88   1
   3  14   818524.40 3207.60   1
   3  14   914765.00 2948.88   1
   3  14  1010787.30 2650.96   1
   3  14  11 5017.72 1204.91   1
   3  14  12 1469.63 407.308   1
   3  15   0 9584.13 2513.32   1
   3  15   183786.20 2037.32   1
   3  15   221276.50 4268.30   1
   3  15   3 2452.27 576.662   1
   3  15   419122.50 3657.64   1
   3  15   5 3451.78 925.536   1
   3  15   610426.00 2414.01   1
   3  15   729879.20 4454.73   1
   3  15   8 5729.95 1514.37   1
   3  15   910274.10 2452.61   1
   3  15  10 988.211  263.83   1
   3  15  1121208.50 4398.60   1
   3  16   0 5343.52 1186.46   1
   3  16   119549.30 3236.96   1
   3  16   223183.70 3647.21   1
   3  16   3 6976.40 1531.63   1
   3  16   410326.10 2493.21   1
   3  16   5 5297.60 1461.75   1
   3  16   616862.50 3436.86   1
   3  16   7 188.888 91.4315   1
   3  16   8 3609.00 1046.65   1
   3  16   9 8376.00 2130.27   1
   3  16  10 65.4308 121.826   1
   3  17   0 5654.21 1409.99   1
   3  17   1 107.441 84.9775   1
   3  17   2 2371.05 579.029   1
   3  17   3 1011.91  257.80   1
   3  17   413559.10 3195.63   1
   3  17   511423.10 2812.81   1
   3  17   6 3266.55 995.015   1
   3  17   7 4277.51 1237.81   1
   3  17   814180.50 3408.96   1
   3  18   0 3871.38 1001.97   1
   3  18   1 666.606 194.848   1
   3  18   2 642.316 215.454   1
   3  18   3 1287.90 474.573   1
   3  18   4 3572.55 1021.15   1
   3  18   5 1475.49 484.071   1
   3  18   6 4313.75 1320.06   1
   3  19   0 739.747 235.638   1
   3  19   1 567.427  186.46   1
   4   0   014421.60 4624.31   1
   4   0   1 90.3936 26.2594   1
   4   0   2127047.0 3030.18   1
   4   0   3 175.487 96.9474   1
   4   0   4311834.0 9884.78   1
   4   0   5  95.754 32.5766   1
   4   0   6111911.0 2780.27   1
   4   0   7  105.29  109.26   1
   4   0   834435.30 4785.60   1
   4   0   9 232.407 82.0554   1
   4   0  10207175.0 4473.60   1
   4   0  11 76.4359 93.4069   1
   4   0  12 2061.14 721.725   1
   4   0  13 186.572 68.8796   1
   4   0  1411127.8011127.80   1
   4   0  15 234.566 252.436   1
   4   0  1632647.70 6546.79   1
   4   0  17-184.555 134.639   1
   4   0  18 6970.83 2784.47   1
   4   1   0 1455.36 315.321   1
   4   1   1125103.0 2933.00   1
   4   1   224515.10 3763.71   1
   4   1   3 4717.83 1056.10   1
   4   1   421723.00 3688.63   1
   4   1   5 1839.84 409.051   1
   4   1   6 131.881 42.6853   1
   4   1   7 5721.08 1079.03   1
   4   1   826588.80 3542.41   1
   4   1   950788.60 3235.02   1
   4   1  1038913.80 3935.27   1
   4   1  1180314.20 1734.25   1
   4   1  1257269.20 2053.75   1
   4   1  13 1995.48 570.247   1
   4   1  14 85.2725 32.4513   1
   4   1  15 1061.27 325.684   1
   4   1  1621256.80 4142.27   1
   4   1  17 5086.94 1411.48   1
   4   1  1859672.70 3006.14   1
   4   2   0 3012.92 581.718   1
   4   2   140649.60 5047.06   1
   4   2   262987.90 4037.60   1
   4   2   3317487.0 7259.81   1
   4   2   4 6717.86 1449.34   1
   4   2   5 110.094 46.2745   1
   4   2   6 9256.47 1546.72   1
   4   2   727472.20 3733.76   1
   4   2   860888.30 2175.59   1
   4   2   966351.30 1841.54   1
   4   2  10144036.0 3215.90   1
   4   2  11 2743.79 763.121   1
   4   2  1218318.10 3311.70   1
   4   2  1338247.40 4602.76   1
   4   2  14 560.761 191.178   1
   4   2  1540131.00 4235.13   1
   4   2  16 30.7795 111.282   1
   4   2  17 415.505 102.881   1
   4   2  18 2115.58 699.855   1
   4   3   010810.70 2083.77   1
   4   3   1231672.0 5085.87   1
   4   3   2 367.776 98.4341   1
   4   3   3 1182.64 241.983   1
   4   3   4193976.0 4765.49   1
   4   3   536613.90 3885.02   1
   4   3   620274.70 3242.81   1
   4   3   7 2350.61 523.279   1
   4   3   817852.20 2941.94   1
   4   3   9 5598.48 1158.74   1
   4   3  10 4954.94 1170.77   1
   4   3  11183410.0 4947.94   1
   4   3  1235489.30 3983.64   1
   4   3  1314697.80 4153.48   1
   4   3  1440841.90 4617.26   1
   4   3  15 7312.38 1842.92   1
   4   3  1633933.30 4745.75   1
   4   3  1712393.90 2987.65   1
   4   3  18 429.562 132.701   1
   4   4   041630.30 4286.87   1
   4   4   121052.10 3045.56   1
   4   4   2 928.995 217.384   1
   4   4   352314.60 4090.77   1
   4   4   4124442.0 2816.33   1
   4   4   511727.00 2243.43   1
   4   4   6175576.0 4803.45   1
   4   4   7 88.9219 57.5863   1
   4   4   844373.60 3787.30   1
   4   4   926402.10 3480.93   1
   4   4  10 445.474 468.746   1
   4   4  11 1606.16 411.756   1
   4   4  12 6039.00 1392.44   1
   4   4  13 522.056 522.084   1
   4   4  14 4189.79 1234.33   1
   4   4  15 9196.26 2230.58   1
   4   4  1623632.70 4393.83   1
   4   4  17 4921.33 1379.02   1
   4   4  18 98.8708 76.7379   1
   4   5   048593.90 4769.07   1
   4   5   188626.00 2025.20   1
   4   5   2 9049.17 1664.91   1
   4   5   3138883.0 3066.68   1
   4   5   4178890.0 4200.61   1
   4   5   5 148.774 77.1442   1
   4   5   620004.90 2868.16   1
   4   5   713510.30 2350.37   1
   4   5   822913.40 3321.90   1
   4   5   919175.50 3292.68   1
   4   5  10 723.496 257.831   1
   4   5  11 2877.91 652.836   1
   4   5  12 2232.45 579.257   1
   4   5  1317040.80 4657.17   1
   4   5  1478588.40 3021.19   1
   4   5  1519118.30 3827.42   1
   4   5  1631053.60 4828.06   1
   4   5  17 4818.98 1394.12   1
   4   6   0 1831.73 475.483   1
   4   6   1 1775.30 357.799   1
   4   6   234636.20 3780.55   1
   4   6   3 3221.49 708.758   1
   4   6   4 881.905 199.698   1
   4   6   546533.20 3542.77   1
   4   6   6170780.0 4528.82   1
   4   6   7159955.0 3732.28   1
   4   6   839389.40 3502.54   1
   4   6   9 177.293 63.3431   1
   4   6  10 1738.02 376.633   1
   4   6  11 4976.62 1222.94   1
   4   6  1237038.70 5680.18   1
   4   6  13121554.0 2715.09   1
   4   6  14 5949.59 1510.42   1
   4   6  15  297.89 160.893   1
   4   6  16 6674.34 1756.65   1
   4   6  17 163.138 105.758   1
   4   7   029146.50 3300.25   1
   4   7   1 233.947 52.1105   1
   4   7   2 236.434 87.0474   1
   4   7   348682.60 3199.34   1
   4   7   417499.50 2694.58   1
   4   7   5124468.0 2849.39   1
   4   7   6 262.778 87.9667   1
   4   7   7 6862.78 1352.80   1
   4   7   8 5575.62 1450.33   1
   4   7   938212.20 3873.53   1
   4   7  10 252.986 99.0297   1
   4   7  1131219.50 4111.90   1
   4   7  12 2198.69 689.766   1
   4   7  13 4084.21 1026.65   1
   4   7  1415001.30 3258.54   1
   4   7  1547685.00 4070.92   1
   4   7  16 4154.81 1191.66   1
   4   7  17 473.702 166.732   1
   4   8   054080.20 2769.80   1
   4   8   1 133.622 102.684   1
   4   8   2 2911.52 569.215   1
   4   8   322140.30 3227.08   1
   4   8   424894.70 3505.41   1
   4   8   5 965.648 208.688   1
   4   8   6 244.622 98.0768   1
   4   8   767869.20 2361.17   1
   4   8   811569.00 2061.10   1
   4   8   9 367.259 136.591   1
   4   8  1035753.40 3609.66   1
   4   8  11 7231.12 2072.36   1
   4   8  12 242.443 108.383   1
   4   8  1391709.60 2006.41   1
   4   8  14 1431.10 443.068   1
   4   8  15 929.862 292.763   1
   4   8  16 2043.85 661.545   1
   4   9   0 2408.25 492.151   1
   4   9   146680.50 3289.14   1
   4   9   227736.20 3243.38   1
   4   9   397633.70 2607.92   1
   4   9   443083.20 3750.46   1
   4   9   5119334.0 3755.49   1
   4   9   6 5165.96 1405.01   1
   4   9   7 126.255 91.6894   1
   4   9   8 5490.84 1305.98   1
   4   9   9  639.30 239.121   1
   4   9  10 6024.23 2028.56   1
   4   9  11 481.297 244.032   1
   4   9  1222273.50 3580.88   1
   4   9  1311403.30 2994.81   1
   4   9  14 2252.59 640.181   1
   4   9  1518740.70 4148.93   1
   4   9  16 1933.43 638.518   1
   4  10   068659.60 1887.70   1
   4  10   1 1365.87 311.533   1
   4  10   223236.60 2993.68   1
   4  10   337749.50 3936.91   1
   4  10   414015.00 3010.13   1
   4  10   512516.60 2034.95   1
   4  10   6105243.0 3591.40   1
   4  10   7 3376.99 809.103   1
   4  10   8 5249.32 1179.76   1
   4  10   955123.10 2590.76   1
   4  10  1032748.90 4877.52   1
   4  10  1115841.30 2912.09   1
   4  10  1216990.40 3138.81   1
   4  10  13 6845.21 1799.83   1
   4  10  14 9748.21 2437.90   1
   4  10  15 920.298 303.722   1
   4  11   013158.00 3681.26   1
   4  11   194342.30 2037.16   1
   4  11   230675.80 4030.42   1
   4  11   353349.00 2625.10   1
   4  11   422020.10 2912.92   1
   4  11   5 8709.12 1718.60   1
   4  11   627087.20 3531.18   1
   4  11   715595.90 2711.78   1
   4  11   8 402.673  166.07   1
   4  11   9 5118.79 1244.42   1
   4  11  1012805.10 2453.18   1
   4  11  1117971.40 3641.87   1
   4  11  12 982.991 357.336   1
   4  11  13 3961.04 1140.72   1
   4  11  14 245.408  114.68   1
   4  12   028172.70 3477.46   1
   4  12   157621.30 1898.56   1
   4  12   2 174.615 84.1882   1
   4  12   3104214.0 2303.49   1
   4  12   4 9437.79 1856.43   1
   4  12   5 7989.83 1815.84   1
   4  12   618235.2018235.20   1
   4  12   7 3161.83 936.722   1
   4  12   8 813.293 197.422   1
   4  12   9108600.0 2371.13   1
   4  12  10 738.749 147.673   1
   4  12  1115621.50 2982.01   1
   4  12  12-9.46839 326.624   1
   4  12  13 769.019 222.518   1
   4  13   048585.30 3555.04   1
   4  13   1145174.0 3435.85   1
   4  13   215728.20 2755.28   1
   4  13   319918.00 4095.17   1
   4  13   4 2648.36 949.244   1
   4  13   511259.30 2825.74   1
   4  13   6 653.265 563.454   1
   4  13   7 2715.29 719.059   1
   4  13   831064.50 4357.72   1
   4  13   9 2376.80 706.579   1
   4  13  10 570.083 163.021   1
   4  13  1127123.60 4701.97   1
   4  13  12 7347.20 1953.63   1
   4  13  13 2088.16 648.943   1
   4  14   026968.80 5745.32   1
   4  14   1 8943.57 2034.78   1
   4  14   2 274.397 87.5764   1
   4  14   330970.10 4261.13   1
   4  14   411346.10 2573.59   1
   4  14   533947.70 4322.83   1
   4  14   6 7995.26 1872.59   1
   4  14   736884.10 4442.40   1
   4  14   813953.80 3118.99   1
   4  14   915749.10 3555.33   1
   4  14  1031694.60 4858.96   1
   4  14  11 2566.86 766.324   1
   4  15   0 9920.52 2306.97   1
   4  15   1 887.815 234.878   1
   4  15   229441.50 4347.19   1
   4  15   3 955.556 303.652   1
   4  15   4 534.148 158.204   1
   4  15   5 8636.56 2124.91   1
   4  15   6 670.999 261.617   1
   4  15   7 501.324 145.232   1
   4  15   843834.80 4497.94   1
   4  15   9 252.919 136.336   1
   4  15  10 62.1255  77.534   1
   4  16   0 529.903 166.359   1
   4  16   1 5864.48 1556.51   1
   4  16   2  343.87 176.723   1
   4  16   3 8304.53 2605.24   1
   4  16   4  941.05 352.371   1
   4  16   516433.10 3622.37   1
   4  16   6 287.726  76.601   1
   4  16   733375.20 5066.55   1
   4  16   8 7632.36 2147.17   1
   4  16   9 211.844 93.6931   1
   4  17   0 1750.77 500.961   1
   4  17   1 135.627  47.837   1
   4  17   2 3138.82 1274.83   1
   4  17   3 6089.32 1947.58   1
   4  17   4 9582.78 2886.71   1
   4  17   525951.20 5509.14   1
   4  17   6  326.29 114.775   1
   4  17   7 454.418 185.166   1
   4  18   0 270.357 181.127   1
   4  18   1 5210.15 1518.43   1
   4  18   2 454.765 204.423   1
   4  18   3 800.438 261.821   1
   4  18   4 425.373 171.188   1
   5   0   0 85.6107 27.6497   1
   5   0   1  784.84 784.845   1
   5   0   2 172.028 172.038   1
   5   0   3652027.01005059.   1
   5   0   4 16.0273 62.3796   1
   5   0   517899.30 3820.42   1
   5   0   6-109.148 155.722   1
   5   0   7 1166.84 1166.85   1
   5   0   8 116.521 41.2515   1
   5   0   9127655.0127655.0   1
   5   0  10 41.7206 23.9685   1
   5   0  11104198.0 2249.98   1
   5   0  12 304.389 112.912   1
   5   0  14 11.8792 6.85774   1
   5   0  15 7804.88 2793.96   1
   5   0  16 172.102 245.985   1
   5   0  17 5798.65 2359.73   1
   5   1   020768.00 3420.78   1
   5   1   1414922.0 9306.31   1
   5   1   2 6481.64 1512.14   1
   5   1   3187994.0 4344.73   1
   5   1   4 7460.97 1507.42   1
   5   1   5 2082.37  444.34   1
   5   1   6 107.396  44.522   1
   5   1   7126236.0 2899.41   1
   5   1   825964.70 3453.40   1
   5   1   911005.70 2633.44   1
   5   1  1010973.30 2643.82   1
   5   1  1115433.70 3456.76   1
   5   1  12 8157.63 2118.90   1
   5   1  1313344.1013344.10   1
   5   1  14 2218.26 604.847   1
   5   1  15 8068.44 2035.32   1
   5   1  16 3577.36 1008.26   1
   5   1  1749692.30 4495.57   1
   5   2   0152639.0 4262.64   1
   5   2   1 119.829 46.8972   1
   5   2   215255.70 2522.46   1
   5   2   3142639.0 3132.28   1
   5   2   4132380.0 3399.37   1
   5   2   562412.10 2081.35   1
   5   2   6 1459.68 310.473   1
   5   2   7 1148.43 264.708   1
   5   2   8 7898.05 1531.78   1
   5   2   977123.40 1688.04   1
   5   2  1030181.90 4563.87   1
   5   2  11 5096.12 1292.38   1
   5   2  1221783.50 4352.57   1
   5   2  13 1014.76 265.581   1
   5   2  14 294.272 90.5796   1
   5   2  15 1809.36 611.645   1
   5   2  1614153.30 3317.24   1
   5   2  17 42.5484 19.5565   1
   5   3   091360.90 2095.25   1
   5   3   137517.60 4185.13   1
   5   3   2127284.0 2957.68   1
   5   3   3189833.0 4176.73   1
   5   3   427444.60 3373.83   1
   5   3   5154023.0 4430.27   1
   5   3   6 7575.53 1687.31   1
   5   3   7 1130.68 312.531   1
   5   3   878411.50 1823.06   1
   5   3   9 3412.64 958.336   1
   5   3  1039457.40 3782.35   1
   5   3  11  127.30 167.777   1
   5   3  1264978.4064978.40   1
   5   3  13 2636.97 693.134   1
   5   3  14 6959.54 1681.85   1
   5   3  1536417.50 4703.13   1
   5   3  16 260.311 111.278   1
   5   3  17 4626.02 1374.31   1
   5   4   050217.50 3183.89   1
   5   4   1131729.0 2909.79   1
   5   4   236010.70 4026.33   1
   5   4   3 240.359 57.6526   1
   5   4   441704.40 3446.70   1
   5   4   5132197.0 3162.36   1
   5   4   6 2570.40 574.538   1
   5   4   758845.10 2017.34   1
   5   4   8 4980.32 1167.09   1
   5   4   9 2032.27 486.762   1
   5   4  1042509.50 3633.47   1
   5   4  11 2471.80 722.708   1
   5   4  12 321.281 654.586   1
   5   4  1341105.70 4723.19   1
   5   4  14 85.6668 86.1526   1
   5   4  1515641.30 3549.45   1
   5   4  16 5377.43 1512.83   1
   5   4  1734112.40 5536.94   1
   5   5   0 6361.34 1327.14   1
   5   5   1 1087.15 269.884   1
   5   5   2 343.557 88.5702   1
   5   5   3 7570.16 1390.58   1
   5   5   4 4713.29 919.704   1
   5   5   5145370.0 3195.36   1
   5   5   6 1651.56 402.965   1
   5   5   7 5418.59 1108.63   1
   5   5   822933.90 4219.12   1
   5   5   9 4858.11 1177.02   1
   5   5  10 483.721 208.432   1
   5   5  1120595.60 5094.78   1
   5   5  1212642.40 3209.78   1
   5   5  13 1811.36  499.46   1
   5   5  14 4366.26 1386.23   1
   5   5  1537463.20 4902.93   1
   5   5  16 7212.03 2005.86   1
   5   6   0 2818.37 584.778   1
   5   6   1 1653.09 364.205   1
   5   6   2 9889.07 1891.81   1
   5   6   3 262.441  66.264   1
   5   6   4 4870.40 905.905   1
   5   6   522680.90 3678.71   1
   5   6   6140135.0 3746.20   1
   5   6   745023.90 4078.73   1
   5   6   842682.90 3289.04   1
   5   6   917006.20 3184.67   1
   5   6  10 6347.11 1321.03   1
   5   6  11 5224.38 1800.06   1
   5   6  1236315.80 4258.97   1
   5   6  1320764.00 4476.79   1
   5   6  14 2706.10 755.781   1
   5   6  15 5213.84 1496.42   1
   5   6  16 2877.33 904.725   1
   5   7   021362.20 3234.50   1
   5   7   117706.20 2865.02   1
   5   7   252082.10 2887.18   1
   5   7   3 788.293 200.953   1
   5   7   4132096.0 3173.49   1
   5   7   5 3075.62 838.998   1
   5   7   6 6741.94 1685.01   1
   5   7   7 222.216 82.0473   1
   5   7   8152033.0 4440.21   1
   5   7   9 9299.04 1849.14   1
   5   7  10 318.228 98.9405   1
   5   7  11 2157.57 565.051   1
   5   7  12 164.955 67.4381   1
   5   7  13 2303.89 900.126   1
   5   7  1471215.80 1753.55   1
   5   7  15 1984.28 610.724   1
   5   7  16 1363.63 493.461   1
   5   8   050082.10 3282.24   1
   5   8   111231.30 2096.16   1
   5   8   215031.30 2600.18   1
   5   8   346874.00 3107.94   1
   5   8   412967.50 2337.10   1
   5   8   5 6935.56 2191.70   1
   5   8   650548.80 2708.51   1
   5   8   7 1726.74 382.084   1
   5   8   831838.90 4018.73   1
   5   8   943297.30 4236.92   1
   5   8  10 106.219 104.248   1
   5   8  1123640.60 4051.03   1
   5   8  1225307.00 4317.13   1
   5   8  13 3115.23 1032.98   1
   5   8  14 2215.06 637.578   1
   5   8  15 710.477 203.707   1
   5   9   019652.80 3032.39   1
   5   9   168070.90 1504.82   1
   5   9   2 7984.86 1916.39   1
   5   9   3 1023.73 340.304   1
   5   9   423105.60 3277.35   1
   5   9   518616.70 3322.34   1
   5   9   618639.10 3308.00   1
   5   9   711221.70 2394.39   1
   5   9   811909.50 3558.65   1
   5   9   9 7682.16 1744.05   1
   5   9  10 322.813 94.9812   1
   5   9  11 3124.00 667.847   1
   5   9  12 1905.91 524.936   1
   5   9  13 1204.53 333.299   1
   5   9  1412678.20 3070.72   1
   5   9  1510290.10 2838.44   1
   5  10   016408.40 4296.62   1
   5  10   1 4895.05 1113.29   1
   5  10   2 586.632 152.277   1
   5  10   313000.30 2604.48   1
   5  10   4 4548.32 1099.85   1
   5  10   5 5927.52 1385.99   1
   5  10   636077.30 4040.81   1
   5  10   729257.8029257.80   1
   5  10   844135.10 3729.40   1
   5  10   953564.30 2765.13   1
   5  10  1033092.40 4473.13   1
   5  10  1112624.40 2885.74   1
   5  10  12 3008.28 988.843   1
   5  10  1313944.70 3791.83   1
   5  10  14 499.921 155.146   1
   5  11   043883.60 3540.46   1
   5  11   117304.00 3250.85   1
   5  11   297737.60 2258.42   1
   5  11   338272.00 3508.73   1
   5  11   4 3466.87 857.926   1
   5  11   5 840.562 308.426   1
   5  11   6 308.902 308.905   1
   5  11   7 1123.50 332.128   1
   5  11   8 945.619 270.624   1
   5  11   9 1203.27 337.994   1
   5  11  1022372.70 4687.19   1
   5  11  11 555.893 215.585   1
   5  11  1236555.00 5820.91   1
   5  11  13 7967.12 2536.41   1
   5  12   031969.60 4052.50   1
   5  12   1 143.404 173.168   1
   5  12   218676.20 4810.34   1
   5  12   3 1575.70 520.516   1
   5  12   423996.20 5514.91   1
   5  12   5 3773.89 1347.12   1
   5  12   6  200.49 71.1724   1
   5  12   7 4144.83 1155.68   1
   5  12   8 8463.56 2117.81   1
   5  12   9 466.301 140.931   1
   5  12  1076569.60 1705.39   1
   5  12  11 1368.49 406.832   1
   5  12  12 27.6235 152.542   1
   5  13   072196.40 2324.92   1
   5  13   119577.20 4103.00   1
   5  13   242283.60 3915.07   1
   5  13   3 864.528 246.999   1
   5  13   4 47.7963 86.5764   1
   5  13   5 3809.81 957.174   1
   5  13   6 139.201 155.342   1
   5  13   7 967.281  269.79   1
   5  13   8 8403.43 2100.80   1
   5  13   9 40.7214 26.7475   1
   5  13  10 9541.28 2785.81   1
   5  13  11 3271.61 1167.83   1
   5  14   012668.50 2781.47   1
   5  14   1 871.911  218.83   1
   5  14   2 1315.47 429.725   1
   5  14   324673.60 4832.02   1
   5  14   438289.40 5028.84   1
   5  14   5 2100.27 683.122   1
   5  14   6 4584.15 1216.28   1
   5  14   7 910.181 239.837   1
   5  14   818959.60 4023.70   1
   5  14   926362.40 4855.46   1
   5  14  1018680.10 4208.09   1
   5  15   0 7760.07 1986.55   1
   5  15   160295.10 2033.24   1
   5  15   2 731.274 219.544   1
   5  15   325808.70 5172.79   1
   5  15   414290.80 3751.77   1
   5  15   513133.80 3613.10   1
   5  15   6 4116.01 1341.10   1
   5  15   7 2643.48 896.187   1
   5  15   810845.70 2828.87   1
   5  15   9 971.585 310.322   1
   5  16   0 8615.37 2176.20   1
   5  16   1 194.605 66.1188   1
   5  16   2 289.091 171.887   1
   5  16   3 6432.83 2017.04   1
   5  16   4 391.105 169.391   1
   5  16   5  150.36 177.048   1
   5  16   641806.80 5914.76   1
   5  16   7  328.28 132.533   1
   5  17   0 492.919 175.253   1
   5  17   117723.60 4658.51   1
   5  17   2-43.0171 380.176   1
   5  17   315423.70 4255.62   1
   5  17   417248.40 4697.91   1
   6   0   0207600.0 8984.72   1
   6   0   1-120.243 303.901   1
   6   0   221234.30 5095.26   1
   6   0   3 70.4482 34.2819   1
   6   0   423147.30 5243.86   1
   6   0   5 87.6628  95.138   1
   6   0   6 9106.36 2752.37   1
   6   0   7-92.3685  80.703   1
   6   0   828808.9028808.90   1
   6   0   9 181.737 263.571   1
   6   0  10102411.0102411.0   1
   6   0  11 546.997 547.031   1
   6   0  12 8808.68 8808.70   1
   6   0  13-39.4957 61.8971   1
   6   0  1412336.20 4113.62   1
   6   0  15 61.6864 183.855   1
   6   0  16 2355.65 1024.80   1
   6   1   0 9233.10 1972.22   1
   6   1   130956.00 3817.35   1
   6   1   2171543.0 3782.75   1
   6   1   3 2673.31 635.332   1
   6   1   4 5586.63 1125.41   1
   6   1   5101155.0 2235.47   1
   6   1   6 2594.45 561.652   1
   6   1   7 2741.13 669.122   1
   6   1   8 1891.51 521.227   1
   6   1   9 3501.81 977.848   1
   6   1  10110736.0 2418.14   1
   6   1  11 6375.72 2158.39   1
   6   1  1291821.80 4002.11   1
   6   1  13 1930.14 555.527   1
   6   1  14 3487.73 978.819   1
   6   1  15 3036.69 921.479   1
   6   1  1624162.50 4982.93   1
   6   2   013825.70 2233.34   1
   6   2   1 8205.31 1490.32   1
   6   2   215846.40 2450.14   1
   6   2   356215.70 2532.38   1
   6   2   454105.90 2435.71   1
   6   2   516101.70 2415.95   1
   6   2   612212.10 2206.92   1
   6   2   7 9222.73 1953.53   1
   6   2   8 1710.84 420.655   1
   6   2   924275.70 4170.66   1
   6   2  10  272.76 111.254   1
   6   2  11 813.387 268.049   1
   6   2  12 220.524 114.289   1
   6   2  1329279.00 4522.80   1
   6   2  14 5761.46 1571.12   1
   6   2  15 4960.58 1354.50   1
   6   2  16 272.817 128.978   1
   6   3   023258.80 3118.54   1
   6   3   137826.30 3444.07   1
   6   3   2 3830.34 791.478   1
   6   3   3 3512.35 717.759   1
   6   3   4 1641.59 358.174   1
   6   3   559437.90 1921.24   1
   6   3   619988.60 3104.22   1
   6   3   750257.20 2979.47   1
   6   3   8113724.0 5110.37   1
   6   3   951662.70 2785.77   1
   6   3  1017345.30 3846.41   1
   6   3  1127403.00 5844.69   1
   6   3  12 7160.87 1744.20   1
   6   3  13 88.3465 138.324   1
   6   3  1436017.70 4795.89   1
   6   3  15 1775.93  615.54   1
   6   3  16 5804.96 1683.61   1
   6   4   031649.00 3772.36   1
   6   4   111847.70 2191.28   1
   6   4   2 1798.39 343.987   1
   6   4   330972.30 4045.73   1
   6   4   4 8925.42 1572.28   1
   6   4   536286.00 3554.12   1
   6   4   6163896.0 4282.05   1
   6   4   7 3635.98 1034.42   1
   6   4   8 4367.27 898.837   1
   6   4   927249.80 4000.24   1
   6   4  10 9398.78 2396.78   1
   6   4  11 1002.23 326.638   1
   6   4  1234865.50 4438.67   1
   6   4  13 3849.08 1065.59   1
   6   4  14 393.948 111.034   1
   6   4  15 418.937 136.581   1
   6   5   025428.50 3484.69   1
   6   5   1 2037.76 426.577   1
   6   5   229167.50 3975.97   1
   6   5   3 711.733 153.817   1
   6   5   414092.00 2210.53   1
   6   5   5 603.817 140.508   1
   6   5   6 989.872 248.981   1
   6   5   7 4768.43 991.737   1
   6   5   891244.80 2567.96   1
   6   5   9 1546.25 407.665   1
   6   5  1014143.90 3347.72   1
   6   5  11 5034.81 1272.87   1
   6   5  12 302.012 249.209   1
   6   5  13 2814.92 781.444   1
   6   5  1451564.30 3781.63   1
   6   5  15 8358.60 2354.14   1
   6   6   035521.60 4042.44   1
   6   6   116528.60 2745.20   1
   6   6   2 785.952 173.307   1
   6   6   3 595.932 150.396   1
   6   6   4 127.874 113.065   1
   6   6   532335.20 5619.13   1
   6   6   6106600.0 3118.67   1
   6   6   734788.40 3554.68   1
   6   6   8 75.5536 69.0391   1
   6   6   9 2209.46 666.018   1
   6   6  1012271.20 2658.59   1
   6   6  11 2939.43 816.846   1
   6   6  12 2477.43 690.801   1
   6   6  13 3049.78 841.279   1
   6   6  14  625.96 184.598   1
   6   6  15 1921.71  610.42   1
   6   7   017345.20 3161.65   1
   6   7   115236.40 2591.24   1
   6   7   2 4230.03 881.989   1
   6   7   312446.80 2485.97   1
   6   7   4 198.488  114.64   1
   6   7   553214.00 2948.26   1
   6   7   610735.70 2313.63   1
   6   7   7 5080.22 1212.08   1
   6   7   8 6228.88 1631.94   1
   6   7   922817.70 4376.47   1
   6   7  1018222.10 4170.19   1
   6   7  11 8593.94 2110.26   1
   6   7  12 7195.53 2101.99   1
   6   7  1315174.40 3377.10   1
   6   7  1410730.50 2838.90   1
   6   8   0 6498.61 2074.32   1
   6   8   157447.6057447.60   1
   6   8   2 148.994 62.3089   1
   6   8   3 4070.20  856.70   1
   6   8   4 1866.56 470.928   1
   6   8   5105357.0 2416.70   1
   6   8   6 6650.38 1548.77   1
   6   8   8 3172.57 1142.92   1
   6   8   912116.60 3079.06   1
   6   8  10 6722.53 1862.10   1
   6   8  1125817.70 5281.60   1
   6   8  12 1548.15 514.369   1
   6   8  13 9543.79 2870.34   1
   6   8  14 1915.89 678.927   1
   6   9   0 5093.69 1199.65   1
   6   9   1 9248.42 2011.55   1
   6   9   232582.30 4026.79   1
   6   9   312126.20 2528.95   1
   6   9   441711.40 3760.19   1
   6   9   5 4959.42 1153.49   1
   6   9   6 4671.15 1615.97   1
   6   9   7 8454.00 2230.24   1
   6   9   8 3531.48 899.402   1
   6   9   9 8090.75 1998.43   1
   6   9  1012617.90 3361.43   1
   6   9  11 453.952 158.819   1
   6   9  1218048.90 4561.30   1
   6   9  13 3075.01 1041.08   1
   6  10   059349.90 1758.26   1
   6  10   145603.20 3463.55   1
   6  10   210527.50 2336.96   1
   6  10   316103.30 3580.38   1
   6  10   448223.9048223.90   1
   6  10   545354.10 4958.15   1
   6  10   627013.50 4760.36   1
   6  10   714419.10 3042.15   1
   6  10   8  254.80 118.997   1
   6  10   926676.40 4394.92   1
   6  10  1029450.90 5439.79   1
   6  10  1115170.30 4063.85   1
   6  10  12 1396.47 546.322   1
   6  11   025802.90 5603.09   1
   6  11   187893.60 2650.25   1
   6  11   2 1082.63 1082.65   1
   6  11   311071.6011071.60   1
   6  11   4 7277.63 2446.31   1
   6  11   517224.50 4789.18   1
   6  11   6 754.872 304.411   1
   6  11   7 3073.11 958.954   1
   6  11   8 2602.57 687.292   1
   6  11   9 204.042 123.018   1
   6  11  10 1706.15 506.863   1
   6  11  1153530.50 4357.24   1
   6  11  12-14.5912 26.2905   1
   6  12   0 8790.11 2875.34   1
   6  12   1 4489.34 1305.21   1
   6  12   2 236.865 74.7313   1
   6  12   351086.00 3516.42   1
   6  12   4 428.929 296.791   1
   6  12   5 2808.96 825.566   1
   6  12   6 385.866 181.256   1
   6  12   7 344.815 109.002   1
   6  12   8 3685.35 1021.74   1
   6  12   938194.20 4939.45   1
   6  12  10 200.938 192.079   1
   6  12  11 9124.96 3038.24   1
   6  13   0 5020.93 1300.81   1
   6  13   142026.30 4675.43   1
   6  13   271190.40 2500.10   1
   6  13   3 2525.03 792.378   1
   6  13   4  285.84 113.405   1
   6  13   5 6548.68 2003.55   1
   6  13   6 240.675 194.116   1
   6  13   7 2778.09  931.74   1
   6  13   8 956.073 316.796   1
   6  13   9 871.961 243.267   1
   6  14   011149.20 2643.37   1
   6  14   1 243.118 87.6437   1
   6  14   220100.80 4567.52   1
   6  14   3 5754.10 1780.44   1
   6  14   4 6386.00 1973.37   1
   6  14   5 3467.27 1070.33   1
   6  14   6 5208.45 1730.83   1
   6  14   7  246.77 200.525   1
   6  14   8 270.067 130.775   1
   6  15   0 6865.67 2077.44   1
   6  15   1 1390.29 669.407   1
   6  15   284124.80 3097.33   1
   6  15   3 672.781 267.359   1
   6  15   4  981.26 349.909   1
   6  15   5 1261.63 502.349   1
   6  15   6 154.542 131.018   1
   6  16   0 661.716 291.587   1
   6  16   1 4846.52 1991.53   1
   6  16   2 4374.17 1449.93   1
   6  16   3 1226.15 392.176   1
   6  16   4 2658.44 874.069   1
   7   0   0 128.852 76.3734   1
   7   0   125122.40 4375.44   1
   7   0   2-32.0047 103.667   1
   7   0   3175848.0 3950.90   1
   7   0   4  72.066 25.0458   1
   7   0   5 1991.17  693.06   1
   7   0   6 89.4336 89.4757   1
   7   0   717151.0017151.00   1
   7   0   8-19.6793 19.9428   1
   7   0   973633.00 1589.98   1
   7   0  10-75.2132  112.49   1
   7   0  11 5586.21 5586.22   1
   7   0  12 207.533 85.0224   1
   7   0  1330988.20 6923.19   1
   7   0  14 172.186 117.515   1
   7   1   018319.80 2891.67   1
   7   1   1142168.0 3530.66   1
   7   1   2 6425.65 1313.89   1
   7   1   323644.10 3713.07   1
   7   1   412961.70 2142.55   1
   7   1   523553.40 3419.40   1
   7   1   6-0.85923 1.85784   1
   7   1   7 5301.29 1526.07   1
   7   1   811406.30 3447.89   1
   7   1   9 6107.22 1677.45   1
   7   1  10 271.173 118.749   1
   7   1  1182993.30 1814.04   1
   7   1  12 3397.88 904.683   1
   7   1  13 9682.62 2457.45   1
   7   1  14 831.536 243.734   1
   7   2   026331.80 3498.92   1
   7   2   119388.90 3055.77   1
   7   2   229206.20 3557.30   1
   7   2   342514.30 3307.79   1
   7   2   442951.00 3335.60   1
   7   2   541550.80 3355.03   1
   7   2   6 3345.88  821.68   1
   7   2   731336.40 5719.51   1
   7   2   8 465.042 128.124   1
   7   2   936704.40 5834.80   1
   7   2  1028224.20 4286.70   1
   7   2  1110402.70 2495.91   1
   7   2  1210417.20 2894.70   1
   7   2  13 3234.41 932.224   1
   7   2  14 2296.99 681.717   1
   7   3   0 3211.96 763.555   1
   7   3   1 5885.98 1381.21   1
   7   3   2 2119.28  462.16   1
   7   3   3 289.668 108.512   1
   7   3   483064.60 2030.06   1
   7   3   5 2188.95 492.785   1
   7   3   622873.70 3292.10   1
   7   3   7 1927.43 579.776   1
   7   3   835909.60 4120.77   1
   7   3   9 2165.81 639.206   1
   7   3  10 5430.02 1524.78   1
   7   3  1115720.90 3813.43   1
   7   3  1219175.30 4568.63   1
   7   3  13 5924.54 1592.50   1
   7   3  14 1889.04 674.594   1
   7   4   012160.40 2470.70   1
   7   4   142014.70 3720.69   1
   7   4   212588.50 2260.70   1
   7   4   325522.50 3409.37   1
   7   4   496471.30 3789.99   1
   7   4   5102495.0 3259.80   1
   7   4   6 2542.27 764.561   1
   7   4   736679.60 5671.48   1
   7   4   815093.00 3523.06   1
   7   4   9 7496.77 1768.59   1
   7   4  10 332.187 137.385   1
   7   4  11 3300.72 909.927   1
   7   4  12 7802.82 2445.29   1
   7   4  1323245.30 4596.17   1
   7   4  14 1620.20 659.812   1
   7   5   0 321.616  69.187   1
   7   5   110094.80 2140.09   1
   7   5   211585.00 2365.63   1
   7   5   3 111.487 66.3709   1
   7   5   4 6112.51 1630.32   1
   7   5   522125.10 3728.39   1
   7   5   6 171.466 48.5615   1
   7   5   7 6236.05 1743.87   1
   7   5   8-103.348 103.753   1
   7   5   910594.20 3416.31   1
   7   5  10 5319.41 1546.02   1
   7   5  11 367.027 174.344   1
   7   5  12 2759.16 892.562   1
   7   5  1319128.70 4883.39   1
   7   5  14 4455.19 1520.94   1
   7   6   052334.80 3114.06   1
   7   6   111470.40 2742.97   1
   7   6   2 9126.44 2302.58   1
   7   6   310733.0010733.00   1
   7   6   4 3037.68 783.749   1
   7   6   532709.60 4064.06   1
   7   6   673351.40 1612.24   1
   7   6   759976.40 3200.54   1
   7   6   8 7127.12 2434.12   1
   7   6   9 9717.37 2585.68   1
   7   6  1021858.90 4671.85   1
   7   6  11 375.668 395.238   1
   7   6  12 1211.57 402.431   1
   7   6  1315425.90 4409.02   1
   7   7   0 277.759 90.4169   1
   7   7   1 7680.44 2441.88   1
   7   7   2 1809.17 642.414   1
   7   7   3 6583.54 2157.09   1
   7   7   423443.80 5372.31   1
   7   7   510040.00 2640.80   1
   7   7   6 3485.44 3485.45   1
   7   7   7 4349.77 1556.88   1
   7   7   856953.30 2634.73   1
   7   7   9 443.513 287.975   1
   7   7  10 683.958 227.878   1
   7   7  11 2056.75 845.716   1
   7   7  12 1928.13 575.514   1
   7   7  13 5652.22 1899.59   1
   7   8   040798.20 3791.54   1
   7   8   1 3054.98 761.648   1
   7   8   243574.90 4228.62   1
   7   8   332030.80 4764.91   1
   7   8   4 6303.23 1813.08   1
   7   8   5 793.324 793.338   1
   7   8   686519.50 5715.71   1
   7   8   7 211.268 55.9845   1
   7   8   810114.70 2398.80   1
   7   8   9 1715.68 549.273   1
   7   8  10 166.188 202.522   1
   7   8  11 353.424 130.015   1
   7   8  12 4282.15 1436.90   1
   7   9   0 8293.03 1914.38   1
   7   9   182741.30 1897.60   1
   7   9   227440.60 4738.80   1
   7   9   3 4790.85 4790.86   1
   7   9   410961.0010961.00   1
   7   9   5 5751.09 1650.47   1
   7   9   6 2476.34 672.898   1
   7   9   7 3874.27 1247.39   1
   7   9   839248.60 4452.74   1
   7   9   9 632.617 193.603   1
   7   9  10 7775.06 2386.03   1
   7   9  1126171.40 5624.59   1
   7  10   375706.90 4227.29   1
   7  10   433922.10 6164.11   1
   7  10   5 1378.93 770.775   1
   7  10   6 333.502 104.334   1
   7  10   7 3909.81 1505.10   1
   7  10   817380.10 5301.25   1
   7  10   914075.4014075.40   1
   7  10  10 5290.35 1756.68   1
   7  10  11 578.355 224.818   1
   7  11   015403.10 3222.58   1
   7  11   1 4621.86 1369.81   1
   7  11   221016.30 4522.49   1
   7  11   3 264.438 279.145   1
   7  11   4-142.692 168.383   1
   7  11   5 3411.46 1059.98   1
   7  11   6 5305.48 1662.29   1
   7  11   7 5796.57 1747.92   1
   7  11   8 145.568 62.4996   1
   7  11   9 273.965 145.099   1
   7  11  1016324.2016324.20   1
   7  12   0 2960.99 903.947   1
   7  12   1 308.245 95.7939   1
   7  12   229198.60 5073.49   1
   7  12   3 5359.91 1629.14   1
   7  12   464540.60 1587.60   1
   7  12   5 939.499 264.236   1
   7  12   6-42.6747 54.8044   1
   7  12   7 135.828 147.253   1
   7  12   8 5819.14 1932.06   1
   7  12   9 238.052 238.099   1
   7  13   0 7798.04 2354.06   1
   7  13   1 3501.94 1131.28   1
   7  13   221914.90 4970.30   1
   7  13   3 355.619 333.237   1
   7  13   4 4057.84 1283.58   1
   7  13   5 5172.37 1707.83   1
   7  13   6 5463.57 1793.48   1
   7  13   7 258.676 244.827   1
   7  14   0 198.746  125.17   1
   7  14   1 442.924 173.312   1
   7  14   2 2629.21 900.374   1
   7  14   322718.20 5511.40   1
   7  14   414605.30 4081.52   1
   7  14   5 804.684 388.334   1
   7  15   0 253.579 88.1206   1
   7  15   1 3165.24 1062.01   1
   7  15   2 333.822 122.266   1
   8   0   0 1618.35 572.725   1
   8   0   1-0.63725 45.1815   1
   8   0   291077.20 3596.63   1
   8   0   3 193.077 88.6467   1
   8   0   497658.1097658.10   1
   8   0   5 116.106 116.138   1
   8   0   6 2225.16 814.341   1
   8   0   7 285.912 285.927   1
   8   0   8 5082.13 1833.90   1
   8   0   9 326.332 169.768   1
   8   0  1016235.6016235.60   1
   8   0  11 -8.4058 156.694   1
   8   0  1227107.80 7052.47   1
   8   0  13 84.7505 143.243   1
   8   1   046291.20 3865.88   1
   8   1   1 293.745 79.5904   1
   8   1   235461.90 4001.05   1
   8   1   3 7123.99 1438.88   1
   8   1   446467.10 3863.41   1
   8   1   5 5475.15 1867.48   1
   8   1   659259.90 2246.84   1
   8   1   719461.90 4146.14   1
   8   1   8 1582.06  483.68   1
   8   1   9 446.261 120.647   1
   8   1  1013952.10 3523.60   1
   8   1  1113594.40 3257.91   1
   8   1  1217853.40 3977.74   1
   8   1  13 80.4701 107.221   1
   8   2   0 1254.45 308.252   1
   8   2   1 5920.54 1394.45   1
   8   2   2 7377.37 1683.92   1
   8   2   338397.40 3942.97   1
   8   2   421248.30 4186.15   1
   8   2   5  140.99 188.977   1
   8   2   611062.9011062.90   1
   8   2   722336.30 4395.68   1
   8   2   825768.50 4908.88   1
   8   2   956753.2056753.20   1
   8   2  10 2473.84 818.327   1
   8   2  11 1670.40 606.951   1
   8   2  12 2353.97 808.937   1
   8   3   0 1833.68 532.104   1
   8   3   123401.00 3772.63   1
   8   3   2 6730.48 1558.41   1
   8   3   3 972.862 300.048   1
   8   3   4 4149.04 1029.38   1
   8   3   518960.60 4054.50   1
   8   3   630987.60 5994.38   1
   8   3   7 4752.39 1709.21   1
   8   3   823993.30 5891.79   1
   8   3   9 311.124 185.713   1
   8   3  1010393.00 2932.27   1
   8   3  1120367.40 4756.03   1
   8   3  12 3348.51 1113.76   1
   8   4   055792.10 2249.38   1
   8   4   1 486.132 159.728   1
   8   4   2 257.815 95.3444   1
   8   4   327005.20 5675.53   1
   8   4   4 1910.69 697.584   1
   8   4   5 279.387 124.254   1
   8   4   626264.40 5866.95   1
   8   4   7 248.889 157.687   1
   8   4   8 3467.86 1314.20   1
   8   4   9 3186.84 1056.78   1
   8   4  1012795.00 3480.31   1
   8   4  11-22.7424 259.633   1
   8   4  12 1101.53 333.628   1
   8   5   0 5268.61 1314.35   1
   8   5   1 8497.90 2717.83   1
   8   5   226103.90 5635.20   1
   8   5   3  111.10 41.8545   1
   8   5   4 3432.83 1232.13   1
   8   5   511506.80 3592.47   1
   8   5   7 6840.38 2417.40   1
   8   5   833817.70 5308.01   1
   8   5   9 73.0689 228.677   1
   8   5  10 596.453 228.946   1
   8   5  11 2428.00  815.23   1
   8   5  12 2421.91 1065.29   1
   8   6   015487.60 3135.75   1
   8   6   134259.60 4175.38   1
   8   6   2 444.448 302.427   1
   8   6   3-57.0704 336.473   1
   8   6   4 1826.58 504.965   1
   8   6   524563.40 5797.57   1
   8   6   610355.80 2866.31   1
   8   6   748600.10 5071.41   1
   8   6   8-28.4031 14.2931   1
   8   6   9 6369.63 1961.56   1
   8   6  10 7299.52 2232.43   1
   8   6  11 565.277  174.40   1
   8   7   0 118.028 130.297   1
   8   7   1 468.372 198.047   1
   8   7   2 2135.89 791.524   1
   8   7   3 9.59514 154.222   1
   8   7   4 1041.73 329.055   1
   8   7   5 7799.89 2062.11   1
   8   7   6 348.333 200.518   1
   8   7   739856.80 6336.58   1
   8   7   8 3119.03 1243.19   1
   8   7   918758.20 5721.40   1
   8   7  10 987.773 366.415   1
   8   7  11 327.696 143.474   1
   8   8   0 1135.86 524.865   1
   8   8   173810.1073810.10   1
   8   8   218213.1018213.10   1
   8   8   3 1044.20 404.644   1
   8   8   411792.70 3798.12   1
   8   8   5 7354.82 2251.10   1
   8   8   6 452.602 216.646   1
   8   8   723665.90 6246.37   1
   8   8   8 376.291 699.615   1
   8   8   9 8317.36 3180.94   1
   8   8  10 243.961 398.255   1
   8   9   0 6964.38 2437.04   1
   8   9   1 673.762 200.522   1
   8   9   216273.70 3839.81   1
   8   9   3 176.976  65.017   1
   8   9   414292.20 3527.21   1
   8   9   5 1587.97 576.658   1
   8   9   6 638.274 210.493   1
   8   9   718812.70 5704.37   1
   8   9   810896.20 3969.42   1
   8   9   927525.90 7294.48   1
   8  10   0 8191.41 2382.67   1
   8  10   116251.80 3807.11   1
   8  10   2 2626.77 1028.58   1
   8  10   338205.90 5321.82   1
   8  10   4 174.872 70.2253   1
   8  10   5 1347.14 553.922   1
   8  10   6 9032.22 2742.95   1
   8  10   7 1093.04 472.842   1
   8  10   8 712.669 317.519   1
   8  11   0 838.178  322.93   1
   8  11   118752.40 4461.77   1
   8  11   2 7042.40 2174.21   1
   8  11   3  369.09 138.936   1
   8  11   4 6441.18 2054.53   1
   8  11   5 2216.47 748.843   1
   8  11   6 560.225 196.175   1
   8  11   7 958.527 347.474   1
   8  12   0 318.385 156.233   1
   8  12   1 263.639 158.816   1
   8  12   2 1429.00 463.489   1
   8  12   372580.70 1730.63   1
   8  12   4 3827.51 1263.41   1
   8  12   5 6103.53 2086.84   1
   8  13   0 616.609 286.684   1
   8  13   117559.80 4733.15   1
   8  13   2 761.467 316.498   1
   8  13   3 1325.07 464.127   1
   9   0   0 111.229 111.265   1
   9   0   512982.1012982.10   1
   9   0   6 147.744 147.757   1
   9   0   7 6225.80 6225.81   1
   9   0   8-21.4905 21.7254   1
   9   0   9 4613.69 4613.70   1
   9   0  10 184.494 184.522   1
   9   1   0 1238.41 465.242   1
   9   1   4 9700.92 9700.93   1
   9   1   525640.0025640.00   1
   9   1   7 2688.98 1067.78   1
   9   1   8 137.575 186.267   1
   9   1   9 5009.93 2010.90   1
   9   1  10 3568.48 1511.93   1
   9   2   013646.3013646.30   1
   9   2   114091.4014091.40   1
   9   2   322615.8022615.80   1
   9   2   4 588.421 588.434   1
   9   2   5 3068.39 3068.41   1
   9   2   7 465.723 344.249   1
   9   2   8 1036.45 434.632   1
   9   2   9 120.758 60.2753   1
   9   2  10 1439.89 495.098   1
   9   3   0 814.862 311.179   1
   9   3   1 247.273 247.276   1
   9   3   247938.20 4854.76   1
   9   3   3 2931.56 2931.58   1
   9   3   4 8069.18 8069.20   1
   9   3   6 3807.86 3807.89   1
   9   3   733884.5033884.50   1
   9   3   8 1860.80 775.264   1
   9   3   931859.20 7321.19   1
   9   3  10 8212.04 2723.87   1
   9   4   119318.10 5200.09   1
   9   4   2 2978.61 916.501   1
   9   4   3 320.957 98.5196   1
   9   4   411637.6011637.60   1
   9   4   5 1007.25 711.242   1
   9   4   6 5949.29 2233.63   1
   9   4   735865.6035865.60   1
   9   4   8 1423.70 603.305   1
   9   4   9 1141.11 498.762   1
   9   5   0 4998.57 1809.33   1
   9   5   1 2401.49 913.674   1
   9   5   2 2058.33  652.07   1
   9   5   3 3169.31 1209.12   1
   9   5   4 1918.63 606.542   1
   9   5   513556.40 4387.09   1
   9   5   614592.90 4717.98   1
   9   5   723852.00 6465.40   1
   9   5   8 6594.38 6594.46   1
   9   5   918233.20 5950.03   1
   9   6   070106.70 1533.64   1
   9   6   132866.10 6388.68   1
   9   6   2 1876.69 1876.70   1
   9   6   3 1388.17 553.799   1
   9   6   410088.80 2898.94   1
   9   6   5 9056.96 3247.83   1
   9   6   614738.30 4834.36   1
   9   6   712141.30 4287.84   1
   9   6   8 342.289 388.886   1
   9   6   9 252.499 378.048   1
   9   7   0 6797.83 2458.74   1
   9   7   1 393.009  108.16   1
   9   7   232955.90 5549.05   1
   9   7   3 1766.47 712.541   1
   9   7   4 331.089 185.879   1
   9   7   5 350.391 148.691   1
   9   7   6 3382.62 1390.98   1
   9   7   7 4096.76 1700.99   1
   9   7   838050.80 7665.77   1
   9   8   052222.90 3929.34   1
   9   8   1 4108.93 1310.25   1
   9   8   2 1597.99 511.729   1
   9   8   317790.90 4484.03   1
   9   8   4 1463.18 535.556   1
   9   8   5 2832.44 981.145   1
   9   8   626906.90 7095.00   1
   9   8   7 623.469 279.765   1
   9   9   0 2108.11 720.764   1
   9   9   1 3740.58 1156.86   1
   9   9   2 9141.10 2771.59   1
   9   9   3 359.032 166.026   1
   9   9   4  610.49 231.383   1
   9   9   5 8494.10 2767.05   1
   9   9   6 2720.89 1184.80   1
   9  10   010951.60 3320.79   1
   9  10   1 96.3941  129.40   1
   9  10   219725.00 5071.45   1
   9  10   3 3484.56 1185.34   1
   9  10   418194.70 5117.82   1
   9  11   0 3071.83 1109.71   1
   9  11   1 1911.50 631.214   1
   9  11   2 903.013 316.937   1
  10   0   0 2643.13 2643.15   1
  10   1   0 1490.92 1490.94   1
  10   2   021065.7021065.70   1
  10   3   0  384.73 384.741   1
  10   3   122749.8022749.80   1
  10   3   514822.3014822.30   1
  10   3   610768.2010768.20   1
  10   4   050030.3050030.30   1
  10   4   1 9534.78 9534.80   1
  10   4   4 43.0568 43.2802   1
  10   4   5 587.158 587.187   1
  10   4   627152.4027152.40   1
  10   5   0 1527.10 1527.11   1
  10   5   3 1208.89 1208.91   1
  10   5   4 278.361 278.393   1
  10   6   029935.9029935.90   1
  10   6   1 7498.37 7498.40   1
  10   6   2 731.351 317.725   1
  10   6   3 18.4403 18.5922   1
  10   6   4  571.40 571.428   1
  10   6   5 4279.11 4279.15   1
  10   7   0 416.363 416.375   1
  10   7   1 9683.00 3656.48   1
  10   7   2 4805.60 1990.87   1
  10   7   3 460.228 206.731   1
  10   8   0  615.14 245.766   1
  10   8   110584.40 3150.67   1
  10   8   2 5837.70 1891.72   1
   0   0   0    0.00    0.00   1
;
_shelx_hkl_checksum   16046
 
data_2
 
_audit_creation_method            'SHELXL-2014/7'
_shelx_SHELXL_version_number      '2014/7'
_chemical_name_systematic         
;
[bis{allyltris(3-trifluoromethylpyrazol-1-yl)borato}cobalt(II)]
;
_chemical_name_common             
'[(Allyl-B(3-CF3Pz)3)2 Co]'
_chemical_melting_point           ?
_chemical_formula_moiety          'C30 H22 B2 Co F18 N12' 
_chemical_formula_sum
 'C30 H22 B2 Co F18 N12' 
_chemical_formula_weight          973.14

loop_
 _atom_type_symbol
 _atom_type_description
 _atom_type_scat_dispersion_real
 _atom_type_scat_dispersion_imag
 _atom_type_scat_source
 'C'  'C'   0.0033   0.0016
 'International Tables Vol C Tables 4.2.6.8 and 6.1.1.4'
 'H'  'H'   0.0000   0.0000
 'International Tables Vol C Tables 4.2.6.8 and 6.1.1.4'
 'N'  'N'   0.0061   0.0033
 'International Tables Vol C Tables 4.2.6.8 and 6.1.1.4'
 'F'  'F'   0.0171   0.0103
 'International Tables Vol C Tables 4.2.6.8 and 6.1.1.4'
 'Co'  'Co'   0.3494   0.9721
 'International Tables Vol C Tables 4.2.6.8 and 6.1.1.4'
 'B'  'B'   0.0013   0.0007
 'International Tables Vol C Tables 4.2.6.8 and 6.1.1.4'
 
_space_group_crystal_system       monoclinic
_space_group_IT_number            15
_space_group_name_H-M_alt         'C 2/c'
_space_group_name_Hall            '-C 2yc'
 
_shelx_space_group_comment
;
The symmetry employed for this shelxl refinement is uniquely defined
by the following loop, which should always be used as a source of
symmetry information in preference to the above space-group names.
They are only intended as comments.
;
 
loop_
 _space_group_symop_operation_xyz
 'x, y, z'
 '-x, y, -z+1/2'
 'x+1/2, y+1/2, z'
 '-x+1/2, y+1/2, -z+1/2'
 '-x, -y, -z'
 'x, -y, z-1/2'
 '-x+1/2, -y+1/2, -z'
 'x+1/2, -y+1/2, z-1/2'
 
_cell_length_a                    20.153(6)
_cell_length_b                    10.246(2)
_cell_length_c                    20.208(5)
_cell_angle_alpha                 90
_cell_angle_beta                  117.378(9)
_cell_angle_gamma                 90
_cell_volume                      3705.4(16)
_cell_formula_units_Z             4
_cell_measurement_temperature     113(2)

_cell_measurement_reflns_used           4299
_cell_measurement_theta_min             2.0233
_cell_measurement_theta_max             27.4580
 
_exptl_crystal_description              'Block'
_exptl_crystal_colour                   'Pale pink'
_exptl_crystal_size_max           0.40
_exptl_crystal_size_mid           0.25
_exptl_crystal_size_min           0.25
_exptl_crystal_density_meas       ?
_exptl_crystal_density_diffrn     1.744
_exptl_crystal_density_method     'not measured'
_exptl_crystal_F_000              1940
_exptl_absorpt_coefficient_mu     0.598
_exptl_absorpt_correction_type    'Numerical'
_exptl_absorpt_correction_T_min   0.8475
_exptl_absorpt_correction_T_max   0.9072
_exptl_absorpt_process_details    
;Numerical (Based on real shape of the crystal) absorption
correction was parformed on CrystalClear (Rigaku Inc., 2007)
with FS_ABSCOR method.
;  
_exptl_special_details
;
 ?
;

  
_diffrn_ambient_temperature       113(2)
_diffrn_radiation_wavelength      0.71073
_diffrn_radiation_type            MoK\a
_diffrn_radiation_monochromator   graphite
_diffrn_measurement_method        \w
_diffrn_standards_number          ?
_diffrn_standards_interval_count  ?
_diffrn_standards_interval_time   ?
_diffrn_standards_decay_%         ?
_diffrn_reflns_av_sigmaI/netI     0.2459
_diffrn_reflns_limit_h_min        -26
_diffrn_reflns_limit_h_max        23
_diffrn_reflns_limit_k_min        0
_diffrn_reflns_limit_k_max        13
_diffrn_reflns_limit_l_min        0
_diffrn_reflns_limit_l_max        26
_reflns_number_total              4168
_reflns_number_gt                 3540
_reflns_threshold_expression      >2\s(I)

_diffrn_special_details
;
 ?
;
_diffrn_source_power                    3.0000
_diffrn_source_voltage                  50.0000
_diffrn_source_current                  60.0000
_diffrn_radiation_source                'Rotating Anode'
_diffrn_radiation_detector              'CCD'
_diffrn_measurement_device
;
Saturn70 (4x4 bin mode)
;
_diffrn_detector_area_resol_mean        28.5714
_diffrn_reflns_number                   4384
_diffrn_number_total                    4384
_diffrn_reflns_av_R_equivalents         0.0770
_diffrn_reflns_av_sigmaI/detI           0.1887
_diffrn_reflns_theta_min                2.0233
_diffrn_reflns_theta_max                27.4580
_diffrn_reflns_reduction_process        'Lp corrections applied'
_diffrn_measurement_details
;
scan:
	Number of images: 360
	           Slice: -115.0000 - 65.0000
	     Image width: 0.5000
	        Exp time: 10.0000
	   Rotation axis: Omega
	           Omega: 0.0000
	             Chi: 45.0000
	             Phi: 0.0000
	             XTD: 55.1187
	          2theta: -25.0022
scan:
	Number of images: 360
	           Slice: -115.0000 - 65.0000
	     Image width: 0.5000
	        Exp time: 10.0000
	   Rotation axis: Omega
	           Omega: 0.0000
	             Chi: 45.0000
	             Phi: 90.0000
	             XTD: 55.1187
	          2theta: -25.0022
scan:
	Number of images: 360
	           Slice: -115.0000 - 65.0000
	     Image width: 0.5000
	        Exp time: 10.0000
	   Rotation axis: Omega
	           Omega: 0.0000
	             Chi: 45.0000
	             Phi: 180.0000
	             XTD: 55.1187
	          2theta: -25.0022

;
_diffrn_measurement_device_details
;
AFC10: Fixed Chi 2 circle
;
_diffrn_orient_matrix_UB_11             -0.0172
_diffrn_orient_matrix_UB_12             0.0268
_diffrn_orient_matrix_UB_13             -0.0460
_diffrn_orient_matrix_UB_21             -0.0189
_diffrn_orient_matrix_UB_22             -0.0856
_diffrn_orient_matrix_UB_23             -0.0428
_diffrn_orient_matrix_UB_31             -0.0540
_diffrn_orient_matrix_UB_32             0.0135
_diffrn_orient_matrix_UB_33             -0.0032
_diffrn_orient_matrix_type              'd*Trek'

 
_computing_data_collection              'CrystalClear (Rigaku Inc., 2007)'
_computing_cell_refinement              'CrystalClear (Rigaku Inc., 2007)'
_computing_data_reduction
                     'CrystalClear (Rigaku Inc., 2007), SORTAV (Blessing, 1995)'
_computing_structure_solution           'SIR92 (Giacovazzo et al, 1993)'
_computing_molecular_graphics           'Ortep-3 for Windows (Farrugia, 1997)'
_computing_publication_material
                                   'WinGX publication routines (Farrugia, 1999)'
 


_exptl_transmission_factor_min    ?
_exptl_transmission_factor_max    ?

_shelx_estimated_absorpt_T_min    0.796
_shelx_estimated_absorpt_T_max    0.865
_exptl_absorpt_special_details    ?

_diffrn_source                    ?
_diffrn_measurement_device_type   ?
_diffrn_reflns_av_unetI/netI      0.2459

_diffrn_reflns_theta_full         25.000
_diffrn_measured_fraction_theta_max   0.978
_diffrn_measured_fraction_theta_full  0.985
_diffrn_reflns_Laue_measured_fraction_max    0.978
_diffrn_reflns_Laue_measured_fraction_full   0.985
_diffrn_reflns_point_group_measured_fraction_max   0.978
_diffrn_reflns_point_group_measured_fraction_full  0.985

_reflns_Friedel_coverage          0.000
_reflns_Friedel_fraction_max      .
_reflns_Friedel_fraction_full     .
 
_reflns_special_details
;
 Reflections were merged by SHELXL according to the crystal
 class for the calculation of statistics and refinement.
 
 _reflns_Friedel_fraction is defined as the number of unique
 Friedel pairs measured divided by the number that would be
 possible theoretically, ignoring centric projections and
 systematic absences.
;
 

_computing_structure_refinement 'SHELXL-2014/7 (Sheldrick, 2014)'

_refine_special_details           ?
_refine_ls_structure_factor_coef  Fsqd
_refine_ls_matrix_type            full
_refine_ls_weighting_scheme       calc
_refine_ls_weighting_details
'w=1/[\s^2^(Fo^2^)+0.2672P] where P=(Fo^2^+2Fc^2^)/3'
_atom_sites_solution_primary      ?
_atom_sites_solution_secondary    ?
_atom_sites_solution_hydrogens    geom
_refine_ls_hydrogen_treatment     constr
_refine_ls_extinction_method      none
_refine_ls_extinction_coef        .
_refine_ls_number_reflns          4168
_refine_ls_number_parameters      286
_refine_ls_number_restraints      0
_refine_ls_R_factor_all           0.0699
_refine_ls_R_factor_gt            0.0631
_refine_ls_wR_factor_ref          0.1403
_refine_ls_wR_factor_gt           0.1315
_refine_ls_goodness_of_fit_ref    1.011
_refine_ls_restrained_S_all       1.011
_refine_ls_shift/su_max           0.001
_refine_ls_shift/su_mean          0.000
 
loop_
 _atom_site_label
 _atom_site_type_symbol
 _atom_site_fract_x
 _atom_site_fract_y
 _atom_site_fract_z
 _atom_site_U_iso_or_equiv
 _atom_site_adp_type
 _atom_site_occupancy
 _atom_site_site_symmetry_order  
 _atom_site_calc_flag
 _atom_site_refinement_flags_posn
 _atom_site_refinement_flags_adp
 _atom_site_refinement_flags_occupancy
 _atom_site_disorder_assembly
 _atom_site_disorder_group
Co1 Co 0.7500 0.2500 0.5000 0.01650(16) Uani 1 2 d S . P . .
F3 F 0.63498(9) -0.07067(18) 0.60994(9) 0.0332(4) Uani 1 1 d . . . . .
F7 F 0.94398(8) 0.30715(18) 0.58864(9) 0.0321(4) Uani 1 1 d . . . . .
F1 F 0.69964(9) 0.10692(16) 0.62733(9) 0.0281(4) Uani 1 1 d . . . . .
F5 F 0.65715(8) 0.55058(16) 0.43408(9) 0.0285(4) Uani 1 1 d . . . . .
F9 F 1.02537(9) 0.21399(19) 0.56256(11) 0.0352(4) Uani 1 1 d . . . . .
F4 F 0.54462(8) 0.47661(17) 0.38038(10) 0.0302(4) Uani 1 1 d . . . . .
F6 F 0.58458(10) 0.59774(18) 0.31933(10) 0.0354(4) Uani 1 1 d . . . . .
F8 F 0.96178(9) 0.37766(18) 0.49764(10) 0.0353(4) Uani 1 1 d . . . . .
F2 F 0.75461(9) -0.08099(19) 0.65157(9) 0.0340(4) Uani 1 1 d . . . . .
N2 N 0.68686(11) -0.0046(2) 0.42117(12) 0.0207(4) Uani 1 1 d . . . . .
N1 N 0.70193(10) 0.0561(2) 0.48732(12) 0.0186(4) Uani 1 1 d . . . . .
N4 N 0.67018(11) 0.1916(2) 0.33639(12) 0.0204(4) Uani 1 1 d . . . . .
N6 N 0.79576(11) 0.0812(2) 0.40414(12) 0.0205(4) Uani 1 1 d . . . . .
N3 N 0.67055(11) 0.2840(2) 0.38471(12) 0.0189(4) Uani 1 1 d . . . . .
N5 N 0.82677(11) 0.1697(2) 0.46082(12) 0.0185(4) Uani 1 1 d . . . . .
C13 C 0.68820(14) -0.0411(3) 0.29338(15) 0.0258(5) Uani 1 1 d . . . . .
H13A H 0.7055 -0.0001 0.2597 0.031 Uiso 1 1 calc R U . . .
H13B H 0.7168 -0.1229 0.3123 0.031 Uiso 1 1 calc R U . . .
C2 C 0.68125(13) -0.0316(3) 0.52452(15) 0.0218(5) Uani 1 1 d . . . . .
C3 C 0.65301(17) -0.1463(3) 0.48392(18) 0.0327(6) Uani 1 1 d . . . . .
H3 H 0.6346 -0.2214 0.4976 0.039 Uiso 1 1 calc R U . . .
C10 C 0.90059(13) 0.1760(3) 0.47788(15) 0.0225(5) Uani 1 1 d . . . . .
C6 C 0.62863(12) 0.3831(3) 0.34133(14) 0.0226(5) Uani 1 1 d . . . . .
C4 C 0.65832(16) -0.1242(3) 0.41865(17) 0.0310(6) Uani 1 1 d . . . . .
H4 H 0.6440 -0.1841 0.3786 0.037 Uiso 1 1 calc R U . . .
C9 C 0.95625(14) 0.2689(3) 0.53166(17) 0.0255(6) Uani 1 1 d . . . . .
C11 C 0.91627(15) 0.0911(3) 0.43291(17) 0.0294(6) Uani 1 1 d . . . . .
H11 H 0.9631 0.0770 0.4335 0.035 Uiso 1 1 calc R U . . .
C7 C 0.60230(14) 0.3557(3) 0.26573(15) 0.0274(6) Uani 1 1 d . . . . .
H7 H 0.5720 0.4092 0.2244 0.033 Uiso 1 1 calc R U . . .
C14 C 0.60581(17) -0.0768(3) 0.24717(17) 0.0351(7) Uani 1 1 d . . . . .
H14 H 0.5700 -0.0154 0.2461 0.042 Uiso 1 1 calc R U . . .
C12 C 0.84889(15) 0.0322(3) 0.38749(16) 0.0284(6) Uani 1 1 d . . . . .
H12 H 0.8410 -0.0320 0.3507 0.034 Uiso 1 1 calc R U . . .
B1 B 0.70913(14) 0.0548(3) 0.36297(16) 0.0197(5) Uani 1 1 d . . . . .
C8 C 0.63011(16) 0.2338(3) 0.26451(17) 0.0276(6) Uani 1 1 d . . . . .
H8 H 0.6228 0.1868 0.2211 0.033 Uiso 1 1 calc R U . . .
C5 C 0.60513(13) 0.5011(3) 0.37005(15) 0.0237(5) Uani 1 1 d . . . . .
C15 C 0.5803(2) -0.1834(5) 0.2093(2) 0.0575(11) Uani 1 1 d . . . . .
H15A H 0.6141 -0.2477 0.2088 0.069 Uiso 1 1 calc R U . . .
H15B H 0.5280 -0.1972 0.1821 0.069 Uiso 1 1 calc R U . . .
C1 C 0.69220(14) -0.0153(3) 0.60246(15) 0.0238(5) Uani 1 1 d . . . . .
 
loop_
 _atom_site_aniso_label
 _atom_site_aniso_U_11
 _atom_site_aniso_U_22
 _atom_site_aniso_U_33
 _atom_site_aniso_U_23
 _atom_site_aniso_U_13
 _atom_site_aniso_U_12
Co1 0.0138(3) 0.0188(3) 0.0193(3) -0.00153(15) 0.0097(2) -0.00050(15)
F3 0.0316(8) 0.0429(11) 0.0338(10) 0.0009(7) 0.0225(8) -0.0115(7)
F7 0.0232(7) 0.0399(11) 0.0362(10) -0.0097(7) 0.0162(7) -0.0054(7)
F1 0.0332(8) 0.0280(9) 0.0290(9) -0.0031(7) 0.0194(7) -0.0058(7)
F5 0.0221(7) 0.0265(9) 0.0332(9) -0.0067(6) 0.0097(7) 0.0004(6)
F9 0.0143(7) 0.0383(10) 0.0485(11) -0.0019(8) 0.0107(7) 0.0028(7)
F4 0.0209(7) 0.0336(10) 0.0401(10) -0.0035(7) 0.0175(7) 0.0050(6)
F6 0.0428(9) 0.0287(10) 0.0360(10) 0.0077(7) 0.0194(8) 0.0121(7)
F8 0.0300(8) 0.0301(9) 0.0485(11) 0.0054(8) 0.0203(8) -0.0064(7)
F2 0.0320(8) 0.0381(10) 0.0300(9) 0.0080(7) 0.0127(7) 0.0041(7)
N2 0.0196(9) 0.0218(11) 0.0241(12) -0.0043(8) 0.0130(9) -0.0039(8)
N1 0.0157(9) 0.0204(11) 0.0227(11) -0.0007(8) 0.0114(8) 0.0013(8)
N4 0.0219(10) 0.0216(11) 0.0217(11) -0.0017(8) 0.0135(9) 0.0008(8)
N6 0.0193(10) 0.0234(11) 0.0219(11) -0.0015(8) 0.0122(9) 0.0018(8)
N3 0.0164(9) 0.0203(11) 0.0214(11) -0.0019(8) 0.0099(9) -0.0015(8)
N5 0.0143(8) 0.0215(10) 0.0235(11) -0.0014(8) 0.0121(8) 0.0003(7)
C13 0.0285(13) 0.0253(14) 0.0252(14) -0.0055(10) 0.0136(12) -0.0008(10)
C2 0.0184(10) 0.0233(13) 0.0258(14) 0.0002(10) 0.0122(10) -0.0013(9)
C3 0.0400(15) 0.0241(15) 0.0423(18) -0.0056(11) 0.0262(14) -0.0123(12)
C10 0.0167(11) 0.0254(13) 0.0291(14) 0.0001(10) 0.0139(10) -0.0005(9)
C6 0.0167(10) 0.0273(14) 0.0245(14) -0.0019(10) 0.0101(10) -0.0035(9)
C4 0.0338(13) 0.0294(15) 0.0316(15) -0.0106(12) 0.0165(12) -0.0113(12)
C9 0.0137(12) 0.0274(14) 0.0380(18) 0.0009(11) 0.0141(13) 0.0000(9)
C11 0.0233(13) 0.0326(15) 0.0392(17) 0.0000(12) 0.0202(12) 0.0044(11)
C7 0.0208(11) 0.0350(16) 0.0235(14) 0.0039(11) 0.0077(10) 0.0052(11)
C14 0.0288(13) 0.0396(18) 0.0298(16) -0.0067(12) 0.0073(13) -0.0070(12)
C12 0.0261(13) 0.0361(16) 0.0303(15) -0.0051(11) 0.0194(12) 0.0034(11)
B1 0.0178(12) 0.0214(13) 0.0224(15) 0.0008(10) 0.0114(11) 0.0013(10)
C8 0.0243(14) 0.0372(16) 0.0194(15) -0.0008(10) 0.0084(12) 0.0043(11)
C5 0.0176(11) 0.0269(13) 0.0240(13) 0.0000(10) 0.0073(10) -0.0017(10)
C15 0.057(2) 0.071(3) 0.055(2) -0.023(2) 0.034(2) -0.030(2)
C1 0.0218(11) 0.0274(14) 0.0262(14) 0.0019(10) 0.0144(11) -0.0023(10)
 
_geom_special_details
;
 All esds (except the esd in the dihedral angle between two l.s. planes)
 are estimated using the full covariance matrix.  The cell esds are taken
 into account individually in the estimation of esds in distances, angles
 and torsion angles; correlations between esds in cell parameters are only
 used when they are defined by crystal symmetry.  An approximate (isotropic)
 treatment of cell esds is used for estimating esds involving l.s. planes.
;
 
loop_
 _geom_bond_atom_site_label_1
 _geom_bond_atom_site_label_2
 _geom_bond_distance
 _geom_bond_site_symmetry_2
 _geom_bond_publ_flag
Co1 N3 2.164(2) 7_656 ?
Co1 N3 2.164(2) . ?
Co1 N1 2.174(2) 7_656 ?
Co1 N1 2.174(2) . ?
Co1 N5 2.1962(18) 7_656 ?
Co1 N5 2.1962(18) . ?
F3 C1 1.354(3) . ?
F7 C9 1.343(3) . ?
F1 C1 1.333(3) . ?
F5 C5 1.335(3) . ?
F9 C9 1.359(3) . ?
F4 C5 1.352(3) . ?
F6 C5 1.347(3) . ?
F8 C9 1.341(3) . ?
F2 C1 1.368(3) . ?
N2 C4 1.345(4) . ?
N2 N1 1.376(3) . ?
N2 B1 1.562(3) . ?
N1 C2 1.354(3) . ?
N4 N3 1.358(3) . ?
N4 C8 1.368(4) . ?
N4 B1 1.576(4) . ?
N6 C12 1.358(3) . ?
N6 N5 1.367(3) . ?
N6 B1 1.574(3) . ?
N3 C6 1.354(3) . ?
N5 C10 1.365(3) . ?
C13 C14 1.528(4) . ?
C13 B1 1.605(4) . ?
C13 H13A 0.9900 . ?
C13 H13B 0.9900 . ?
C2 C3 1.396(4) . ?
C2 C1 1.496(4) . ?
C3 C4 1.390(4) . ?
C3 H3 0.9500 . ?
C10 C11 1.395(4) . ?
C10 C9 1.491(4) . ?
C6 C7 1.396(4) . ?
C6 C5 1.509(4) . ?
C4 H4 0.9500 . ?
C11 C12 1.380(4) . ?
C11 H11 0.9500 . ?
C7 C8 1.374(4) . ?
C7 H7 0.9500 . ?
C14 C15 1.296(5) . ?
C14 H14 0.9500 . ?
C12 H12 0.9500 . ?
C8 H8 0.9500 . ?
C15 H15A 0.9500 . ?
C15 H15B 0.9500 . ?
 
loop_
 _geom_angle_atom_site_label_1
 _geom_angle_atom_site_label_2
 _geom_angle_atom_site_label_3
 _geom_angle
 _geom_angle_site_symmetry_1
 _geom_angle_site_symmetry_3
 _geom_angle_publ_flag
N3 Co1 N3 180.00(11) 7_656 . ?
N3 Co1 N1 87.22(8) 7_656 7_656 ?
N3 Co1 N1 92.78(8) . 7_656 ?
N3 Co1 N1 92.78(8) 7_656 . ?
N3 Co1 N1 87.22(8) . . ?
N1 Co1 N1 180.0 7_656 . ?
N3 Co1 N5 88.12(8) 7_656 7_656 ?
N3 Co1 N5 91.88(8) . 7_656 ?
N1 Co1 N5 87.96(7) 7_656 7_656 ?
N1 Co1 N5 92.04(7) . 7_656 ?
N3 Co1 N5 91.88(8) 7_656 . ?
N3 Co1 N5 88.12(8) . . ?
N1 Co1 N5 92.04(7) 7_656 . ?
N1 Co1 N5 87.96(7) . . ?
N5 Co1 N5 180.0 7_656 . ?
C4 N2 N1 110.4(2) . . ?
C4 N2 B1 126.3(2) . . ?
N1 N2 B1 123.0(2) . . ?
C2 N1 N2 104.7(2) . . ?
C2 N1 Co1 140.82(18) . . ?
N2 N1 Co1 114.52(15) . . ?
N3 N4 C8 110.4(2) . . ?
N3 N4 B1 122.6(2) . . ?
C8 N4 B1 127.0(2) . . ?
C12 N6 N5 110.2(2) . . ?
C12 N6 B1 127.9(2) . . ?
N5 N6 B1 121.73(18) . . ?
C6 N3 N4 105.2(2) . . ?
C6 N3 Co1 138.64(18) . . ?
N4 N3 Co1 114.75(15) . . ?
C10 N5 N6 105.55(19) . . ?
C10 N5 Co1 139.25(18) . . ?
N6 N5 Co1 115.13(13) . . ?
C14 C13 B1 117.1(2) . . ?
C14 C13 H13A 108.0 . . ?
B1 C13 H13A 108.0 . . ?
C14 C13 H13B 108.0 . . ?
B1 C13 H13B 108.0 . . ?
H13A C13 H13B 107.3 . . ?
N1 C2 C3 112.2(2) . . ?
N1 C2 C1 125.2(2) . . ?
C3 C2 C1 122.4(2) . . ?
C4 C3 C2 103.4(2) . . ?
C4 C3 H3 128.3 . . ?
C2 C3 H3 128.3 . . ?
N5 C10 C11 110.7(2) . . ?
N5 C10 C9 125.5(2) . . ?
C11 C10 C9 123.6(2) . . ?
N3 C6 C7 111.6(2) . . ?
N3 C6 C5 124.4(2) . . ?
C7 C6 C5 123.6(2) . . ?
N2 C4 C3 109.3(2) . . ?
N2 C4 H4 125.3 . . ?
C3 C4 H4 125.3 . . ?
F8 C9 F7 106.7(2) . . ?
F8 C9 F9 105.7(2) . . ?
F7 C9 F9 106.3(2) . . ?
F8 C9 C10 111.6(2) . . ?
F7 C9 C10 116.0(2) . . ?
F9 C9 C10 109.8(2) . . ?
C12 C11 C10 104.9(2) . . ?
C12 C11 H11 127.5 . . ?
C10 C11 H11 127.5 . . ?
C8 C7 C6 104.5(2) . . ?
C8 C7 H7 127.8 . . ?
C6 C7 H7 127.8 . . ?
C15 C14 C13 125.9(3) . . ?
C15 C14 H14 117.0 . . ?
C13 C14 H14 117.0 . . ?
N6 C12 C11 108.7(2) . . ?
N6 C12 H12 125.7 . . ?
C11 C12 H12 125.7 . . ?
N2 B1 N6 107.6(2) . . ?
N2 B1 N4 109.44(19) . . ?
N6 B1 N4 106.5(2) . . ?
N2 B1 C13 111.8(2) . . ?
N6 B1 C13 110.45(19) . . ?
N4 B1 C13 110.9(2) . . ?
N4 C8 C7 108.3(3) . . ?
N4 C8 H8 125.8 . . ?
C7 C8 H8 125.8 . . ?
F5 C5 F6 106.7(2) . . ?
F5 C5 F4 106.4(2) . . ?
F6 C5 F4 105.70(19) . . ?
F5 C5 C6 115.6(2) . . ?
F6 C5 C6 109.8(2) . . ?
F4 C5 C6 112.1(2) . . ?
C14 C15 H15A 120.0 . . ?
C14 C15 H15B 120.0 . . ?
H15A C15 H15B 120.0 . . ?
F1 C1 F3 107.8(2) . . ?
F1 C1 F2 106.4(2) . . ?
F3 C1 F2 105.0(2) . . ?
F1 C1 C2 116.0(2) . . ?
F3 C1 C2 110.5(2) . . ?
F2 C1 C2 110.5(2) . . ?
 
loop_
 _geom_torsion_atom_site_label_1
 _geom_torsion_atom_site_label_2
 _geom_torsion_atom_site_label_3
 _geom_torsion_atom_site_label_4
 _geom_torsion
 _geom_torsion_site_symmetry_1
 _geom_torsion_site_symmetry_2
 _geom_torsion_site_symmetry_3
 _geom_torsion_site_symmetry_4
 _geom_torsion_publ_flag
C4 N2 N1 C2 -0.1(3) . . . . ?
B1 N2 N1 C2 -173.8(2) . . . . ?
C4 N2 N1 Co1 179.19(18) . . . . ?
B1 N2 N1 Co1 5.5(3) . . . . ?
C8 N4 N3 C6 1.2(3) . . . . ?
B1 N4 N3 C6 -176.72(19) . . . . ?
C8 N4 N3 Co1 -167.74(17) . . . . ?
B1 N4 N3 Co1 14.3(3) . . . . ?
C12 N6 N5 C10 1.1(3) . . . . ?
B1 N6 N5 C10 -174.3(2) . . . . ?
C12 N6 N5 Co1 -176.27(18) . . . . ?
B1 N6 N5 Co1 8.3(3) . . . . ?
N2 N1 C2 C3 -0.3(3) . . . . ?
Co1 N1 C2 C3 -179.27(19) . . . . ?
N2 N1 C2 C1 175.0(2) . . . . ?
Co1 N1 C2 C1 -3.9(4) . . . . ?
N1 C2 C3 C4 0.6(3) . . . . ?
C1 C2 C3 C4 -174.9(2) . . . . ?
N6 N5 C10 C11 -0.6(3) . . . . ?
Co1 N5 C10 C11 175.8(2) . . . . ?
N6 N5 C10 C9 173.9(2) . . . . ?
Co1 N5 C10 C9 -9.7(4) . . . . ?
N4 N3 C6 C7 -0.8(3) . . . . ?
Co1 N3 C6 C7 163.95(19) . . . . ?
N4 N3 C6 C5 172.1(2) . . . . ?
Co1 N3 C6 C5 -23.1(4) . . . . ?
N1 N2 C4 C3 0.5(3) . . . . ?
B1 N2 C4 C3 173.9(2) . . . . ?
C2 C3 C4 N2 -0.6(3) . . . . ?
N5 C10 C9 F8 -92.5(3) . . . . ?
C11 C10 C9 F8 81.3(3) . . . . ?
N5 C10 C9 F7 30.1(4) . . . . ?
C11 C10 C9 F7 -156.1(3) . . . . ?
N5 C10 C9 F9 150.6(3) . . . . ?
C11 C10 C9 F9 -35.6(4) . . . . ?
N5 C10 C11 C12 -0.1(3) . . . . ?
C9 C10 C11 C12 -174.7(3) . . . . ?
N3 C6 C7 C8 0.1(3) . . . . ?
C5 C6 C7 C8 -172.9(2) . . . . ?
B1 C13 C14 C15 -152.3(4) . . . . ?
N5 N6 C12 C11 -1.2(3) . . . . ?
B1 N6 C12 C11 173.9(2) . . . . ?
C10 C11 C12 N6 0.8(3) . . . . ?
C4 N2 B1 N6 -117.0(3) . . . . ?
N1 N2 B1 N6 55.6(3) . . . . ?
C4 N2 B1 N4 127.6(3) . . . . ?
N1 N2 B1 N4 -59.7(3) . . . . ?
C4 N2 B1 C13 4.4(3) . . . . ?
N1 N2 B1 C13 177.0(2) . . . . ?
C12 N6 B1 N2 121.2(3) . . . . ?
N5 N6 B1 N2 -64.2(3) . . . . ?
C12 N6 B1 N4 -121.6(3) . . . . ?
N5 N6 B1 N4 53.0(3) . . . . ?
C12 N6 B1 C13 -1.0(4) . . . . ?
N5 N6 B1 C13 173.5(2) . . . . ?
N3 N4 B1 N2 47.1(3) . . . . ?
C8 N4 B1 N2 -130.5(3) . . . . ?
N3 N4 B1 N6 -68.9(3) . . . . ?
C8 N4 B1 N6 113.5(3) . . . . ?
N3 N4 B1 C13 170.9(2) . . . . ?
C8 N4 B1 C13 -6.7(3) . . . . ?
C14 C13 B1 N2 60.3(3) . . . . ?
C14 C13 B1 N6 180.0(2) . . . . ?
C14 C13 B1 N4 -62.1(3) . . . . ?
N3 N4 C8 C7 -1.2(3) . . . . ?
B1 N4 C8 C7 176.6(2) . . . . ?
C6 C7 C8 N4 0.7(3) . . . . ?
N3 C6 C5 F5 40.7(3) . . . . ?
C7 C6 C5 F5 -147.3(2) . . . . ?
N3 C6 C5 F6 161.4(2) . . . . ?
C7 C6 C5 F6 -26.5(3) . . . . ?
N3 C6 C5 F4 -81.5(3) . . . . ?
C7 C6 C5 F4 90.6(3) . . . . ?
N1 C2 C1 F1 22.8(3) . . . . ?
C3 C2 C1 F1 -162.3(2) . . . . ?
N1 C2 C1 F3 145.8(2) . . . . ?
C3 C2 C1 F3 -39.3(3) . . . . ?
N1 C2 C1 F2 -98.4(3) . . . . ?
C3 C2 C1 F2 76.5(3) . . . . ?
 
_refine_diff_density_max    0.796
_refine_diff_density_min   -0.529
_refine_diff_density_rms    0.078

_shelx_res_file
;

    shelx.res created by SHELXL-2014/7

TITL shelx in C 2/c
CELL  0.71073  20.1500  10.2500  20.2100   90.000  117.380   90.000
ZERR     4.00   0.0060   0.0020   0.0050    0.000    0.009    0.000
LATT   7
SYMM  - X,   Y, 1/2 - Z
SFAC  C    H    N    F    CO   B
UNIT  120 88 48 72 4 8
MERG   2
OMIT     8   2   2
FMAP  -2
PLAN   25
SIZE     0.250   0.250   0.400
ACTA    50.00
BOND   $H
CONF
LIST   4
L.S.  10
TEMP  -160.00
WGHT    0.000000    0.267200
FVAR       3.66126
CO1   5    0.750000    0.250000    0.500000    10.50000    0.01380    0.01881 =
         0.01935   -0.00153    0.00973   -0.00050
F3    4    0.634980   -0.070671    0.609944    11.00000    0.03163    0.04289 =
         0.03376    0.00086    0.02254   -0.01154
F7    4    0.943983    0.307150    0.588642    11.00000    0.02316    0.03988 =
         0.03621   -0.00967    0.01615   -0.00544
F1    4    0.699639    0.106921    0.627327    11.00000    0.03324    0.02804 =
         0.02900   -0.00310    0.01944   -0.00576
F5    4    0.657145    0.550584    0.434080    11.00000    0.02213    0.02654 =
         0.03322   -0.00665    0.00970    0.00040
F9    4    1.025369    0.213987    0.562559    11.00000    0.01427    0.03832 =
         0.04849   -0.00195    0.01066    0.00282
F4    4    0.544625    0.476611    0.380385    11.00000    0.02087    0.03365 =
         0.04014   -0.00352    0.01751    0.00496
F6    4    0.584578    0.597744    0.319332    11.00000    0.04284    0.02875 =
         0.03600    0.00771    0.01937    0.01205
F8    4    0.961784    0.377660    0.497639    11.00000    0.02998    0.03009 =
         0.04852    0.00543    0.02033   -0.00642
F2    4    0.754610   -0.080994    0.651568    11.00000    0.03200    0.03810 =
         0.02999    0.00795    0.01271    0.00414
N2    3    0.686859   -0.004603    0.421166    11.00000    0.01961    0.02184 =
         0.02407   -0.00434    0.01303   -0.00387
N1    3    0.701930    0.056050    0.487315    11.00000    0.01572    0.02038 =
         0.02269   -0.00066    0.01140    0.00133
N4    3    0.670183    0.191612    0.336385    11.00000    0.02185    0.02158 =
         0.02173   -0.00175    0.01350    0.00081
N6    3    0.795758    0.081211    0.404141    11.00000    0.01929    0.02341 =
         0.02189   -0.00150    0.01220    0.00183
N3    3    0.670546    0.284016    0.384711    11.00000    0.01643    0.02032 =
         0.02137   -0.00189    0.00987   -0.00150
N5    3    0.826767    0.169730    0.460820    11.00000    0.01435    0.02152 =
         0.02345   -0.00135    0.01209    0.00030
C13   1    0.688196   -0.041076    0.293376    11.00000    0.02849    0.02530 =
         0.02516   -0.00546    0.01357   -0.00078
AFIX  23
H13A  2    0.705543   -0.000128    0.259708    11.00000   -1.20000
H13B  2    0.716845   -0.122925    0.312259    11.00000   -1.20000
AFIX   0
C2    1    0.681251   -0.031609    0.524523    11.00000    0.01843    0.02335 =
         0.02584    0.00025    0.01221   -0.00134
C3    1    0.653007   -0.146292    0.483916    11.00000    0.04003    0.02414 =
         0.04231   -0.00563    0.02620   -0.01229
AFIX  43
H3    2    0.634573   -0.221446    0.497609    11.00000   -1.20000
AFIX   0
C10   1    0.900587    0.176013    0.477880    11.00000    0.01675    0.02539 =
         0.02914    0.00005    0.01388   -0.00051
C6    1    0.628626    0.383090    0.341330    11.00000    0.01672    0.02727 =
         0.02449   -0.00185    0.01010   -0.00345
C4    1    0.658321   -0.124162    0.418650    11.00000    0.03379    0.02943 =
         0.03159   -0.01056    0.01654   -0.01132
AFIX  43
H4    2    0.644030   -0.184112    0.378555    11.00000   -1.20000
AFIX   0
C9    1    0.956248    0.268860    0.531661    11.00000    0.01372    0.02736 =
         0.03805    0.00087    0.01409    0.00001
C11   1    0.916272    0.091116    0.432913    11.00000    0.02329    0.03263 =
         0.03918    0.00004    0.02019    0.00437
AFIX  43
H11   2    0.963111    0.076966    0.433451    11.00000   -1.20000
AFIX   0
C7    1    0.602299    0.355676    0.265734    11.00000    0.02076    0.03505 =
         0.02348    0.00388    0.00765    0.00522
AFIX  43
H7    2    0.571975    0.409240    0.224428    11.00000   -1.20000
AFIX   0
C14   1    0.605814   -0.076833    0.247166    11.00000    0.02879    0.03961 =
         0.02976   -0.00665    0.00732   -0.00701
AFIX  43
H14   2    0.570030   -0.015380    0.246073    11.00000   -1.20000
AFIX   0
C12   1    0.848886    0.032196    0.387488    11.00000    0.02612    0.03610 =
         0.03034   -0.00513    0.01937    0.00342
AFIX  43
H12   2    0.840990   -0.031989    0.350686    11.00000   -1.20000
AFIX   0
B1    6    0.709131    0.054762    0.362968    11.00000    0.01779    0.02145 =
         0.02237    0.00084    0.01140    0.00127
C8    1    0.630112    0.233796    0.264510    11.00000    0.02430    0.03723 =
         0.01935   -0.00085    0.00836    0.00432
AFIX  43
H8    2    0.622759    0.186848    0.221135    11.00000   -1.20000
AFIX   0
C5    1    0.605132    0.501072    0.370051    11.00000    0.01760    0.02689 =
         0.02401   -0.00004    0.00732   -0.00169
C15   1    0.580341   -0.183409    0.209329    11.00000    0.05663    0.07109 =
         0.05482   -0.02328    0.03412   -0.02970
AFIX  93
H15A  2    0.614052   -0.247687    0.208785    11.00000   -1.20000
H15B  2    0.527963   -0.197232    0.182145    11.00000   -1.20000
AFIX   0
C1    1    0.692204   -0.015321    0.602463    11.00000    0.02177    0.02735 =
         0.02624    0.00194    0.01439   -0.00228
HKLF    4

REM  shelx in C 2/c
REM R1 =  0.0631 for    3540 Fo > 4sig(Fo)  and  0.0699 for all    4168 data
REM    286 parameters refined using      0 restraints

END

WGHT      0.0000      0.2672

REM Highest difference peak  0.796,  deepest hole -0.529,  1-sigma level  0.078
Q1    1   0.7495  0.3376  0.4998  11.00000  0.05    0.80
Q2    1   0.7168  0.2543  0.4427  11.00000  0.05    0.62
Q3    1   0.7792  0.3019  0.4998  11.00000  0.05   -0.53
Q4    1   0.7191  0.2991  0.4998  11.00000  0.05   -0.48
Q5    1   0.7684  0.1222  0.5381  11.00000  0.05   -0.40
Q6    1   0.6826  0.1259  0.3489  11.00000  0.05    0.38
Q7    1   0.9480  0.2172  0.5923  11.00000  0.05    0.37
Q8    1   0.5841  0.5425  0.3679  11.00000  0.05   -0.36
Q9    1   0.6762  0.2008  0.3886  11.00000  0.05    0.34
Q10   1   0.9862  0.3017  0.5643  11.00000  0.05   -0.34
Q11   1   0.9149  0.2603  0.4800  11.00000  0.05    0.33
Q12   1   0.7009  0.4012  0.4602  11.00000  0.05    0.33
Q13   1   0.6992  0.0009  0.3336  11.00000  0.05    0.32
Q14   1   1.0239  0.3073  0.5541  11.00000  0.05    0.32
Q15   1   0.6820 -0.1157  0.5263  11.00000  0.05    0.31
Q16   1   0.6221  0.4343  0.3492  11.00000  0.05    0.30
Q17   1   0.7036  0.3213  0.3451  11.00000  0.05   -0.30
Q18   1   0.8001  0.1625  0.4082  11.00000  0.05    0.30
Q19   1   0.8086 -0.0004  0.3711  11.00000  0.05   -0.30
Q20   1   0.6200  0.2488  0.3081  11.00000  0.05   -0.29
Q21   1   0.7717  0.0643  0.4529  11.00000  0.05   -0.29
Q22   1   0.6791  0.0350  0.4969  11.00000  0.05    0.29
Q23   1   0.6106  0.6221  0.3469  11.00000  0.05   -0.28
Q24   1   0.8697 -0.0551  0.3575  11.00000  0.05   -0.28
Q25   1   0.7033 -0.0307  0.6380  11.00000  0.05   -0.28
;
_shelx_res_checksum    2907

_shelx_hkl_file
;
 -26   0  11 462.366 462.786   1
 -26   0  1231312.30 7829.12   1
 -26   0  13 209.859 95.7976   1
 -26   0  14 6352.02 6352.61   1
 -25   1   6 3489.89 1311.59   1
 -25   1   728137.80 7588.50   1
 -25   1   8 3280.74 1388.92   1
 -25   1   935111.20 6405.79   1
 -25   1  10 263.436 412.831   1
 -25   1  1125256.30 5981.97   1
 -25   1  12 87.2279 47.7895   1
 -25   1  1327382.70 5344.75   1
 -25   1  14 1070.09 652.777   1
 -25   1  15 2053.49 635.919   1
 -25   1  16 98.4556 157.679   1
 -25   1  17 4219.89 1224.42   1
 -25   1  18 -7.3767 48.8668   1
 -25   3   8 1547.18 584.297   1
 -25   3   914849.70 3828.51   1
 -25   3  10 508.011 167.872   1
 -25   3  11 7922.91 2295.64   1
 -25   3  12 3835.98 1362.12   1
 -25   3  13 3995.74 1381.33   1
 -25   3  14 504.108 168.549   1
 -25   3  15 358.732 158.262   1
 -24   0   3  190.50 220.365   1
 -24   0   4 5237.13 2151.44   1
 -24   0   5 -0.5245 330.857   1
 -24   0   6163221.0 9010.24   1
 -24   0   7 249.396 249.678   1
 -24   0   891019.5091019.50   1
 -24   0   9 306.113 143.486   1
 -24   0  1010776.20 4052.29   1
 -24   0  11   71.44 598.619   1
 -24   0  1222163.30 6823.17   1
 -24   0  13 322.375 142.392   1
 -24   0  1418200.20 6026.14   1
 -24   0  15 218.959 97.1357   1
 -24   0  1652303.10 6973.99   1
 -24   0  17 161.868 129.248   1
 -24   0  1853919.30 6547.10   1
 -24   0  19 121.539 210.926   1
 -24   0  2026873.10 7440.27   1
 -24   2   3 825.594 826.009   1
 -24   2   4 7312.93 2004.82   1
 -24   2   5 207.823 154.889   1
 -24   2   6 1354.05 489.347   1
 -24   2   7 868.108 330.937   1
 -24   2   811160.50 5597.22   1
 -24   2   9 527.294 203.107   1
 -24   2  1027975.50 6007.78   1
 -24   2  11 214.285 203.179   1
 -24   2  1215243.00 3754.33   1
 -24   2  13 1571.11  487.43   1
 -24   2  14 459.987 242.055   1
 -24   2  15 2606.32 789.101   1
 -24   2  16 288.673 148.042   1
 -24   2  17 1866.42 541.145   1
 -24   2  18 1106.56 305.372   1
 -24   2  19 1851.47 587.104   1
 -24   4   5  73.266 76.2181   1
 -24   4   6 6116.35 2046.41   1
 -24   4   7 3941.21 1319.26   1
 -24   4   853483.60 4719.10   1
 -24   4   9 2521.95 905.191   1
 -24   4  10 4904.26 1673.44   1
 -24   4  11 970.133 422.602   1
 -24   4  12 57.4651 66.1155   1
 -24   4  13 2915.24 873.404   1
 -24   4  14 311.479 110.757   1
 -24   4  15 4089.86 1221.18   1
 -24   4  1619382.70 4484.47   1
 -24   4  17 5369.93 2207.99   1
 -23   1   1 351.007  155.86   1
 -23   1   2 453.462 152.041   1
 -23   1   3 2808.35 904.115   1
 -23   1   4  565.37 192.083   1
 -23   1   556113.30 4625.15   1
 -23   1   6 1297.41 691.436   1
 -23   1   774984.90 6799.20   1
 -23   1   8 574.924 240.886   1
 -23   1   9 4090.69 1291.04   1
 -23   1  10 4534.20 1637.19   1
 -23   1  11 3145.25 1094.20   1
 -23   1  12 3158.51 929.295   1
 -23   1  13 663.094 211.708   1
 -23   1  14 4214.78 1248.94   1
 -23   1  1516874.60 4065.50   1
 -23   1  16 6244.37 1812.80   1
 -23   1  1732010.40 5726.42   1
 -23   1  18 2327.84 756.101   1
 -23   1  1922301.60 4962.63   1
 -23   1  20  375.49 111.928   1
 -23   1  21 1998.72 609.145   1
 -23   3   2 2158.20 650.223   1
 -23   3   320530.20 5488.44   1
 -23   3   4 997.657 306.653   1
 -23   3   5 7732.60 1774.67   1
 -23   3   6 818.722 288.132   1
 -23   3   7 3.49163 71.3904   1
 -23   3   8 2482.81  840.68   1
 -23   3   9 204.691 141.566   1
 -23   3  10 9753.66 2847.31   1
 -23   3  11 2750.79 884.595   1
 -23   3  12 2691.43 869.363   1
 -23   3  13 2021.92 624.303   1
 -23   3  14 287.173 101.213   1
 -23   3  15 5840.84 1628.58   1
 -23   3  16 1556.61 423.155   1
 -23   3  1718349.20 4327.61   1
 -23   3  18 1790.82 566.602   1
 -23   3  19 5398.76 1514.93   1
 -23   3  20 691.769 338.846   1
 -23   5   4 850.137 850.778   1
 -23   5   5 2228.98 1445.30   1
 -23   5   6 299.463 416.235   1
 -23   5   733057.70 5663.93   1
 -23   5   8 2061.58 538.338   1
 -23   5   913505.60 3792.84   1
 -23   5  10 6123.50 1832.93   1
 -23   5  11 1841.58 697.491   1
 -23   5  12 534.669 230.703   1
 -23   5  13 9923.89 3317.06   1
 -23   5  14 640.679 239.237   1
 -23   5  1529731.60 5655.39   1
 -23   5  16 541.127 188.957   1
 -23   5  17 4453.10 1265.09   1
 -22   0   1-80.1996 82.7438   1
 -22   0   211796.80 4364.89   1
 -22   0   3-297.536 298.241   1
 -22   0   434552.10 8275.33   1
 -22   0   5 496.729 497.302   1
 -22   0   663947.10 5498.66   1
 -22   0   7 215.381 133.571   1
 -22   0   8 529.225 198.829   1
 -22   0   9 225.282 287.215   1
 -22   0  10 850.315 372.013   1
 -22   0  11-159.438 160.914   1
 -22   0  12 7430.37 7430.65   1
 -22   0  13 184.008 341.749   1
 -22   0  14100198.0 5531.18   1
 -22   0  15 -12.865 382.932   1
 -22   0  16137344.023373.40   1
 -22   0  17-68.0306 160.089   1
 -22   0  18 3485.26 1466.03   1
 -22   0  19  78.986 362.803   1
 -22   0  20 8727.08 3390.57   1
 -22   0  21 205.333 145.017   1
 -22   0  2233645.70 7959.33   1
 -22   2   1 364.135 151.936   1
 -22   2   2 9719.84 2694.19   1
 -22   2   3 168.438 142.224   1
 -22   2   412129.00 3153.74   1
 -22   2   5 2358.92 765.302   1
 -22   2   6 3745.72 1096.16   1
 -22   2   7 86.6734 81.8413   1
 -22   2   8 532.938 202.237   1
 -22   2   9 5702.13 1636.86   1
 -22   2  1027204.90 5488.19   1
 -22   2  11  245.92 106.691   1
 -22   2  1220969.20 5305.59   1
 -22   2  13 189.013 195.144   1
 -22   2  14 9999.41 2686.31   1
 -22   2  15 4671.27 1347.83   1
 -22   2  1615770.00 3962.59   1
 -22   2  17  246.41 180.416   1
 -22   2  18 7379.72 1938.71   1
 -22   2  19 2671.84 787.321   1
 -22   2  20 329.693  115.13   1
 -22   2  21 5795.28 1443.48   1
 -22   2  22 2767.05 743.859   1
 -22   4   1 1849.86 813.122   1
 -22   4   2 9627.72 3992.46   1
 -22   4   3 3400.49 1516.19   1
 -22   4   4 5219.41 1245.03   1
 -22   4   5 1262.39  296.78   1
 -22   4   617765.60 4840.09   1
 -22   4   7 -151.81 274.467   1
 -22   4   8 9110.29 3052.63   1
 -22   4   9 6615.17 2299.15   1
 -22   4  10 141.152 136.933   1
 -22   4  11 633.577 228.647   1
 -22   4  1212314.00 3745.19   1
 -22   4  1327092.20 6096.25   1
 -22   4  1412558.30 2954.01   1
 -22   4  15 4267.55 1089.38   1
 -22   4  1684713.4016755.40   1
 -22   4  17 38.4025 89.5793   1
 -22   4  1851703.50 6110.52   1
 -22   4  19 168.132 115.834   1
 -22   4  2022134.60 4870.41   1
 -22   6   4 3490.74 1476.03   1
 -22   6   5 838.779 583.226   1
 -22   6   6 2169.59 1039.02   1
 -22   6   7 3653.34 1952.51   1
 -22   6   816620.90 3849.09   1
 -22   6   9 9035.25 2707.91   1
 -22   6  10 1071.44 327.467   1
 -22   6  11 1382.76 407.628   1
 -22   6  1219452.70 6277.80   1
 -22   6  13 3473.54 1125.19   1
 -22   6  1435073.80 8029.89   1
 -22   6  15 151.201 95.7674   1
 -22   6  16 4888.38 1293.58   1
 -22   6  17 636.989 637.539   1
 -21   1   1 1245.30 389.664   1
 -21   1   2 937.012 296.794   1
 -21   1   3 3858.39 1388.92   1
 -21   1   4 2961.34 864.342   1
 -21   1   512920.00 3026.04   1
 -21   1   6 1532.50 385.979   1
 -21   1   7 5420.49 1812.45   1
 -21   1   8 6167.65 1785.78   1
 -21   1   937852.20 6188.09   1
 -21   1  10 108.269 152.167   1
 -21   1  1174182.00 3594.17   1
 -21   1  1270278.50 5174.83   1
 -21   1  1314074.10 5085.36   1
 -21   1  1420144.50 5320.01   1
 -21   1  1517522.50 4270.25   1
 -21   1  16 465.397  163.31   1
 -21   1  17 4338.35 1395.31   1
 -21   1  18 488.778 130.371   1
 -21   1  19 5541.61 1636.62   1
 -21   1  20 647.663 185.528   1
 -21   1  21 2837.07  908.61   1
 -21   1  22 5959.51 1705.47   1
 -21   1  2320942.90 4588.53   1
 -21   3   1 6536.82 2196.40   1
 -21   3   2 215.098 70.7013   1
 -21   3   311012.20 2795.67   1
 -21   3   4 7273.40 2051.77   1
 -21   3   5 4631.98 1381.03   1
 -21   3   6  215.45 190.851   1
 -21   3   714758.20 6110.35   1
 -21   3   819118.30 5296.27   1
 -21   3   9 254.085  98.351   1
 -21   3  10 5671.68 1586.15   1
 -21   3  1126064.30 5439.78   1
 -21   3  1213992.80 3575.36   1
 -21   3  1398028.70 7181.33   1
 -21   3  14 8031.01 2170.37   1
 -21   3  15136131.015304.00   1
 -21   3  16 812.342 231.121   1
 -21   3  17 8279.93 2205.98   1
 -21   3  18 2097.25 659.583   1
 -21   3  19 6974.56 1889.30   1
 -21   3  20 261.367 93.8434   1
 -21   3  21 584.731 179.603   1
 -21   3  22 2065.78 615.453   1
 -21   5   117807.60 4260.01   1
 -21   5   2 2484.61 1016.59   1
 -21   5   329278.10 6143.79   1
 -21   5   4 639.057 347.061   1
 -21   5   519870.30 4446.96   1
 -21   5   6 5733.65 1664.05   1
 -21   5   762217.40 3851.50   1
 -21   5   8 5548.85 1741.11   1
 -21   5   957164.10 5266.33   1
 -21   5  10 6103.10 2814.56   1
 -21   5  1179893.5017140.50   1
 -21   5  12 998.252 456.478   1
 -21   5  1330342.00 5868.15   1
 -21   5  14 4563.13 1588.07   1
 -21   5  15 9212.32 2785.41   1
 -21   5  16 6252.85 1802.27   1
 -21   5  17 2015.57 647.804   1
 -21   5  18 8107.83 2236.78   1
 -21   5  1943217.10 5543.43   1
 -21   5  20 292.316 93.6163   1
 -21   7   4   0.794 246.882   1
 -21   7   5 2116.99 897.289   1
 -21   7   6 342.773  176.13   1
 -21   7   7 8314.94 2219.50   1
 -21   7   8 7200.89 2341.05   1
 -21   7   9 2001.13 606.537   1
 -21   7  10 1012.61 566.098   1
 -21   7  11 1537.32 667.326   1
 -21   7  1219747.50 6334.95   1
 -21   7  13 431.535  315.25   1
 -21   7  14 258.793 140.836   1
 -21   7  1523309.90 5052.29   1
 -21   7  16 7395.92 7396.09   1
 -20   0   1 178.165 78.9996   1
 -20   0   214644.8014645.00   1
 -20   0   3 -73.695  83.254   1
 -20   0   4 7119.56 2304.18   1
 -20   0   5 353.431 356.421   1
 -20   0   630419.80 8397.27   1
 -20   0   7 518.724 374.846   1
 -20   0   8272717.0272717.0   1
 -20   0   9 630.498 312.275   1
 -20   0  1083771.7083771.70   1
 -20   0  11-82.8235 85.7278   1
 -20   0  1220600.1020600.20   1
 -20   0  13 316.892 317.199   1
 -20   0  1426176.5026176.90   1
 -20   0  15 219.588 220.881   1
 -20   0  1616043.20 5618.10   1
 -20   0  17  218.68 96.9299   1
 -20   0  18 8536.45 3340.73   1
 -20   0  19 11.6291 79.1359   1
 -20   0  20 762.221 333.489   1
 -20   0  21 242.128 163.717   1
 -20   0  2211079.80 4144.02   1
 -20   0  23 55.4315 296.352   1
 -20   0  24 607.757 352.706   1
 -20   2   1 355.157 152.092   1
 -20   2   211332.40 3185.82   1
 -20   2   3 1136.10 355.216   1
 -20   2   4132339.0 6067.88   1
 -20   2   523007.30 5161.21   1
 -20   2   660190.90 5188.29   1
 -20   2   7 1728.61 531.963   1
 -20   2   820082.10 4111.73   1
 -20   2   912536.60 3822.95   1
 -20   2  1081243.00 4484.83   1
 -20   2  11 7308.41 2943.27   1
 -20   2  1239672.50 8936.46   1
 -20   2  13 204.639 152.395   1
 -20   2  14 9286.21 2430.75   1
 -20   2  1521765.00 6921.09   1
 -20   2  16 3409.60 1017.72   1
 -20   2  17 3372.38 983.844   1
 -20   2  18 367.943 138.527   1
 -20   2  19  248.06 89.8541   1
 -20   2  20 2748.14 825.759   1
 -20   2  21 1005.56 288.436   1
 -20   2  2249578.60 8043.69   1
 -20   2  23 665.053 294.758   1
 -20   4   110851.00 3596.69   1
 -20   4   215205.60 4454.47   1
 -20   4   3 193.251 145.146   1
 -20   4   412811.40 3873.98   1
 -20   4   5 5465.27 1909.52   1
 -20   4   654208.90 5527.46   1
 -20   4   7 507.574 233.153   1
 -20   4   8 209.347 124.727   1
 -20   4   918172.10 5074.78   1
 -20   4  1023467.10 4656.37   1
 -20   4  1140947.60 5805.13   1
 -20   4  12 800.902 269.517   1
 -20   4  13 2279.86 667.904   1
 -20   4  1411904.60 3503.55   1
 -20   4  1522064.80 5769.63   1
 -20   4  1624651.20 6347.17   1
 -20   4  17 872.869 312.387   1
 -20   4  1846161.00 5962.25   1
 -20   4  19  832.48 259.744   1
 -20   4  2015627.20 3747.35   1
 -20   4  21 2415.39 747.002   1
 -20   4  22 595.334 274.642   1
 -20   6   124234.30 4846.43   1
 -20   6   220522.60 4503.48   1
 -20   6   315863.60 3962.12   1
 -20   6   4 2891.46 852.071   1
 -20   6   5 9914.06 2323.49   1
 -20   6   627981.30 4818.73   1
 -20   6   7 995.784  437.11   1
 -20   6   811010.20 3230.16   1
 -20   6   9 1298.04 594.661   1
 -20   6  10 6061.16 2086.41   1
 -20   6  1112345.30 3548.15   1
 -20   6  1229951.50 5868.08   1
 -20   6  13 319.031  288.94   1
 -20   6  1449456.20 5520.11   1
 -20   6  15 4224.50 1222.23   1
 -20   6  16 682.473 276.864   1
 -20   6  1712060.10 3185.82   1
 -20   6  18 160.719 184.866   1
 -20   6  19 1712.86 518.173   1
 -20   8   4 4297.15 4297.44   1
 -20   8   5 1113.66 1143.27   1
 -20   8   6 8865.82 2537.71   1
 -20   8   7 959.828 587.452   1
 -20   8   8 9882.27 2662.55   1
 -20   8   9 23.8806 109.447   1
 -20   8  10 3369.75 945.891   1
 -20   8  11 1372.37 402.004   1
 -20   8  12 889.448 264.242   1
 -20   8  13 4150.83 1274.13   1
 -20   8  14 4001.27 1274.28   1
 -19   1   128142.40 5696.59   1
 -19   1   222318.80 4551.39   1
 -19   1   3124924.0 4869.13   1
 -19   1   417121.20 3737.83   1
 -19   1   576996.00 2977.66   1
 -19   1   682452.70 2985.49   1
 -19   1   726843.30 4613.27   1
 -19   1   8 8344.88 2142.50   1
 -19   1   9103712.0 3975.19   1
 -19   1  1040457.90 6449.73   1
 -19   1  11 9846.80 2587.14   1
 -19   1  1240334.10 6514.16   1
 -19   1  1338616.40 6521.79   1
 -19   1  1430273.40 8443.13   1
 -19   1  1559328.8059328.90   1
 -19   1  1617462.00 6016.80   1
 -19   1  1732905.90 5722.39   1
 -19   1  18 2970.32 920.671   1
 -19   1  1919521.20 4291.69   1
 -19   1  20 7112.73 1966.72   1
 -19   1  2146319.70 8308.63   1
 -19   1  2219051.20 4401.32   1
 -19   1  2313063.50 3183.03   1
 -19   1  24 1856.64 629.308   1
 -19   3   1 1722.33 479.513   1
 -19   3   210279.50 3245.35   1
 -19   3   3 120.357 61.7114   1
 -19   3   429442.90 5910.90   1
 -19   3   547911.40 7192.65   1
 -19   3   649702.90 5597.61   1
 -19   3   736011.40 6292.07   1
 -19   3   816147.90 3629.64   1
 -19   3   9 340.411  122.02   1
 -19   3  1010819.80 3350.48   1
 -19   3  11  805.62 287.513   1
 -19   3  12 4990.03 2339.22   1
 -19   3  13  546.20 546.898   1
 -19   3  14 1328.18  454.17   1
 -19   3  15 2189.51 716.548   1
 -19   3  16-192.571 439.494   1
 -19   3  17 5888.34 2010.39   1
 -19   3  18 129.361 99.8904   1
 -19   3  1930634.60 5798.60   1
 -19   3  20-10.2979 201.055   1
 -19   3  2110507.10 2756.40   1
 -19   3  22 314.116 284.063   1
 -19   3  2311789.30 3075.31   1
 -19   5   150244.00 5457.08   1
 -19   5   2 2852.49 984.903   1
 -19   5   328874.00 5289.89   1
 -19   5   4-25.9734  257.50   1
 -19   5   574796.30 3505.28   1
 -19   5   610682.90 3339.19   1
 -19   5   7 669.818 242.077   1
 -19   5   8 1013.76 330.368   1
 -19   5   9 2837.38 941.006   1
 -19   5  1021945.70 5743.68   1
 -19   5  11 2641.11 731.329   1
 -19   5  12 2164.41 662.375   1
 -19   5  13 5388.53 1533.32   1
 -19   5  1414754.70 3710.51   1
 -19   5  15 4351.06 1272.76   1
 -19   5  16 499.342 152.847   1
 -19   5  17 253.381 141.783   1
 -19   5  1815001.90 3716.25   1
 -19   5  19 6460.13 1764.90   1
 -19   5  20 8097.65 2278.69   1
 -19   5  21 5497.47 1483.64   1
 -19   5  22 1590.82 610.715   1
 -19   7   132439.80 5609.99   1
 -19   7   2 2780.57 728.143   1
 -19   7   3 9097.15 2464.89   1
 -19   7   4 2617.25 876.746   1
 -19   7   5 1778.58 518.269   1
 -19   7   6 634.218 197.348   1
 -19   7   7 306.857   96.39   1
 -19   7   8 1.25188 26.9627   1
 -19   7   9 1832.98 719.794   1
 -19   7  10 482.061 350.094   1
 -19   7  11 5126.77 1464.30   1
 -19   7  12 5374.38 1544.64   1
 -19   7  13 7865.98 2189.71   1
 -19   7  14 257.961 79.7887   1
 -19   7  1523210.30 4893.86   1
 -19   7  16 2558.57 723.387   1
 -19   7  17 618.344 183.808   1
 -19   7  18 701.829 216.991   1
 -19   7  19 564.648 565.114   1
 -19   9   618242.9018243.00   1
 -19   9   745449.9045450.00   1
 -19   9   812200.70 3237.51   1
 -19   9   9 4999.50 1740.91   1
 -19   9  10 786.539 587.626   1
 -19   9  11 2399.10 2399.67   1
 -18   0   1-9.82304 22.8572   1
 -18   0   218878.40 6484.06   1
 -18   0   3 1435.86 1436.23   1
 -18   0   4 2649.91 2032.67   1
 -18   0   5 211.221 97.9566   1
 -18   0   6 7645.99 2522.53   1
 -18   0   7 228.898 171.323   1
 -18   0   8 541.688  200.04   1
 -18   0   9 147.561 76.0977   1
 -18   0  1013172.40 4145.50   1
 -18   0  11-4.02448 9.99307   1
 -18   0  1218041.2018041.30   1
 -18   0  13 344.854 166.123   1
 -18   0  14153235.0 8458.96   1
 -18   0  15 63.6483  202.09   1
 -18   0  1640066.6040066.70   1
 -18   0  1813439.3013439.40   1
 -18   0  19 380.185 167.732   1
 -18   0  2064543.90 8504.59   1
 -18   0  21 236.555 133.568   1
 -18   0  22 4540.50 1880.54   1
 -18   0  23 533.979  345.63   1
 -18   0  24 4281.69 1784.14   1
 -18   0  25 256.174 114.099   1
 -18   2   1 9860.08 2611.54   1
 -18   2   225349.80 5548.93   1
 -18   2   3-79.2046 257.572   1
 -18   2   475191.80 3763.67   1
 -18   2   5 2953.22 832.364   1
 -18   2   6 4216.84 983.139   1
 -18   2   7 1446.00 726.772   1
 -18   2   832290.40 5880.03   1
 -18   2   9 2167.96 593.688   1
 -18   2  1015165.20 3562.64   1
 -18   2  11 2325.01 689.638   1
 -18   2  1211311.30 2950.67   1
 -18   2  13 9229.97 2555.15   1
 -18   2  1469653.20 6632.03   1
 -18   2  15 2864.29  902.49   1
 -18   2  17 3807.90 1306.89   1
 -18   2  1885705.80 9368.52   1
 -18   2  19 6909.26 2362.10   1
 -18   2  2021186.50 4902.18   1
 -18   2  21 5152.28 1684.33   1
 -18   2  2234962.00 6435.31   1
 -18   2  2315092.90 4352.33   1
 -18   2  2412194.80 3151.18   1
 -18   4   146282.9013585.50   1
 -18   4   2 1578.34 1087.63   1
 -18   4   340781.50 7580.79   1
 -18   4   473833.00 4444.83   1
 -18   4   523289.10 6257.62   1
 -18   4   6 8617.65 1939.91   1
 -18   4   7 4176.91 1184.25   1
 -18   4   810101.00 2476.97   1
 -18   4   9 650.624 169.787   1
 -18   4  10 1454.47 389.212   1
 -18   4  11 1882.18 857.299   1
 -18   4  1233987.50 7320.35   1
 -18   4  1386782.4086782.50   1
 -18   4  1442832.80 8930.92   1
 -18   4  1515387.60 5464.82   1
 -18   4  16 532.784 288.337   1
 -18   4  17 3408.82 1011.35   1
 -18   4  18 9444.98 2545.51   1
 -18   4  19 6896.77 1972.90   1
 -18   4  2011357.20 3051.01   1
 -18   4  21 333.762 193.404   1
 -18   4  2212911.90 3466.18   1
 -18   4  23 2001.49 744.101   1
 -18   6   1  412.26 278.462   1
 -18   6   236477.80 5776.33   1
 -18   6   3 4182.02 1063.50   1
 -18   6   4 114.793 145.642   1
 -18   6   5 7250.55 1959.83   1
 -18   6   614193.30 4099.04   1
 -18   6   737801.70 6857.68   1
 -18   6   8 9532.70 3089.75   1
 -18   6   918255.70 5271.59   1
 -18   6  1025516.30 5375.17   1
 -18   6  1115629.40 3699.68   1
 -18   6  12 7031.80 1883.60   1
 -18   6  13 1196.90  296.55   1
 -18   6  14 4234.90 1274.04   1
 -18   6  15 4720.09 1432.97   1
 -18   6  16 1693.79 529.201   1
 -18   6  1712066.80 3003.39   1
 -18   6  18 9828.62 2736.64   1
 -18   6  19 1674.45 474.085   1
 -18   6  20 551.186 220.917   1
 -18   6  21 1346.75 427.315   1
 -18   8   1 3991.77 1302.16   1
 -18   8   214172.40 3462.58   1
 -18   8   3 870.859 350.788   1
 -18   8   413008.20 3310.77   1
 -18   8   5 67.1809 44.4578   1
 -18   8   6 6639.86 1746.28   1
 -18   8   7 9204.04 3093.11   1
 -18   8   8 6501.31 1829.69   1
 -18   8   9 3808.58 1392.00   1
 -18   8  10 1531.78 528.218   1
 -18   8  11 356.022 186.078   1
 -18   8  1214328.90 3225.91   1
 -18   8  13 3032.43 861.002   1
 -18   8  14 2315.84 651.325   1
 -18   8  15 532.834 329.798   1
 -18   8  16 6713.22 1951.31   1
 -18   8  17 4880.21 1405.63   1
 -17   1   124503.30 8115.66   1
 -17   1   2 639.734 217.933   1
 -17   1   339729.60 6081.49   1
 -17   1   4 9615.99 2510.89   1
 -17   1   5 941.513 292.562   1
 -17   1   6100253.0 3838.18   1
 -17   1   7 210.063 74.0285   1
 -17   1   816731.80 4411.43   1
 -17   1   9 2524.13 804.135   1
 -17   1  10 3651.39 1261.75   1
 -17   1  1155787.30 8025.93   1
 -17   1  1280401.30 6495.58   1
 -17   1  13179274.0 8411.94   1
 -17   1  14 2088.31 676.516   1
 -17   1  15121331.0 8780.14   1
 -17   1  1614558.60 3808.01   1
 -17   1  1725966.60 7840.65   1
 -17   1  1838127.1038127.20   1
 -17   1  1925983.70 7674.87   1
 -17   1  20 381.008 142.638   1
 -17   1  2114188.80 3578.74   1
 -17   1  22 282.764 164.789   1
 -17   1  2312329.50 3056.19   1
 -17   1  24 4426.29 1186.24   1
 -17   1  2517538.60 3934.10   1
 -17   3   1 3849.79 979.568   1
 -17   3   2 7347.36 2078.66   1
 -17   3   3 6010.62 1699.96   1
 -17   3   4 1256.91 409.288   1
 -17   3   515698.80 3284.25   1
 -17   3   6  116.52 98.3301   1
 -17   3   732925.30 6182.39   1
 -17   3   8  97.586 101.861   1
 -17   3   9258866.022848.00   1
 -17   3  10 1476.62 446.708   1
 -17   3  1150636.00 7217.31   1
 -17   3  1219900.40 4825.27   1
 -17   3  1332182.70 6276.47   1
 -17   3  14 1142.19 372.067   1
 -17   3  1526274.10 5478.27   1
 -17   3  1634022.60 8770.51   1
 -17   3  1721945.20 5737.33   1
 -17   3  18 615.427 167.261   1
 -17   3  1915987.50 4240.63   1
 -17   3  20 924.402 286.603   1
 -17   3  2168346.50 7093.18   1
 -17   3  22 7657.43 2209.90   1
 -17   3  23 1925.26 561.651   1
 -17   3  24 720.975 296.745   1
 -17   5   1 994.295 346.717   1
 -17   5   2 5066.25 2102.09   1
 -17   5   3106914.0 6289.88   1
 -17   5   4 1340.18 1772.80   1
 -17   5   5102271.0 4902.84   1
 -17   5   634826.60 5114.73   1
 -17   5   7 3292.21 988.518   1
 -17   5   8 5970.01 1822.68   1
 -17   5   9 811.296 232.346   1
 -17   5  10 1104.67 353.321   1
 -17   5  1122161.80 6320.58   1
 -17   5  1242766.40 9081.57   1
 -17   5  1398479.10 5774.47   1
 -17   5  1453391.90 6123.29   1
 -17   5  15 523.784 225.097   1
 -17   5  16 2129.92 693.872   1
 -17   5  17 9510.85 2994.39   1
 -17   5  18 7605.58 2501.73   1
 -17   5  19 284.774  154.79   1
 -17   5  20 199.966 156.089   1
 -17   5  2119708.60 4531.53   1
 -17   5  22 844.357 282.784   1
 -17   5  23 3145.93 1062.89   1
 -17   7   143890.30 5628.90   1
 -17   7   2 9154.81 2448.63   1
 -17   7   3 73.2893 94.5159   1
 -17   7   4 898.761 276.777   1
 -17   7   5 257.521  141.88   1
 -17   7   619616.40 3889.29   1
 -17   7   720265.70 5396.54   1
 -17   7   8 4087.90 4088.17   1
 -17   7   941342.20 5981.70   1
 -17   7  10 1108.80 323.147   1
 -17   7  11 5235.58 1376.25   1
 -17   7  12 5773.63 1704.34   1
 -17   7  13 118.465 89.5038   1
 -17   7  14  300.27  184.99   1
 -17   7  15 380.527  156.43   1
 -17   7  16 88.4469 143.606   1
 -17   7  1717905.10 4154.34   1
 -17   7  18 418.551 126.612   1
 -17   7  19 1445.47 428.179   1
 -17   7  20  817.51 297.891   1
 -17   9   1 1970.23  615.68   1
 -17   9   2 62.2117 281.695   1
 -17   9   3 2835.25 810.169   1
 -17   9   4 2333.58 1153.04   1
 -17   9   518291.60 4188.62   1
 -17   9   6 6070.97 3884.99   1
 -17   9   723917.20 5690.02   1
 -17   9   8 7206.05 2325.13   1
 -17   9   915264.00 4278.32   1
 -17   9  1015345.20 3588.24   1
 -17   9  1122297.20 4840.83   1
 -17   9  12 814.143 1043.09   1
 -17   9  1321640.10 4138.42   1
 -17   9  14 618.012 232.114   1
 -17   9  15 2704.75 838.185   1
 -16   0   1-9.19296 201.113   1
 -16   0   2211622.0 9677.08   1
 -16   0   3 107.794  63.624   1
 -16   0   430594.70 7827.73   1
 -16   0   5 134.896 269.768   1
 -16   0   654652.1010734.30   1
 -16   0   7 261.721 221.083   1
 -16   0   8 6834.05 2255.27   1
 -16   0   9 115.502  240.89   1
 -16   0  1091646.00 5059.10   1
 -16   0  11 148.195 90.5727   1
 -16   0  1226759.3026759.40   1
 -16   0  14 5456.17 5456.41   1
 -16   0  15-139.782 90.9313   1
 -16   0  16127527.024864.60   1
 -16   0  17  287.56 128.909   1
 -16   0  18 2880.31 2880.72   1
 -16   0  19 103.848 213.908   1
 -16   0  20209163.0209163.0   1
 -16   0  21 -64.329 70.8144   1
 -16   0  22 689.518  302.10   1
 -16   0  23 487.204 423.158   1
 -16   0  24 2559.22 1441.53   1
 -16   0  25 347.566 154.187   1
 -16   2   1 69.4291 143.817   1
 -16   2   2 3304.93 866.818   1
 -16   2   3 373.697 105.731   1
 -16   2   412087.00 2791.97   1
 -16   2   536584.50 5784.91   1
 -16   2   6101116.0 3722.65   1
 -16   2   710346.10 2444.17   1
 -16   2   8135430.0 8983.11   1
 -16   2   9 2111.06 708.839   1
 -16   2  10 384.169 118.888   1
 -16   2  1144390.9010357.30   1
 -16   2  1246188.4046188.50   1
 -16   2  13 4298.47 1851.59   1
 -16   2  1489334.90 4107.48   1
 -16   2  1532708.30 6419.43   1
 -16   2  16146319.0 7524.68   1
 -16   2  17 753.893 255.226   1
 -16   2  1819441.70 6521.10   1
 -16   2  1969153.90 5100.71   1
 -16   2  2016325.30 4041.60   1
 -16   2  21 315.147 107.977   1
 -16   2  2241774.80 6960.90   1
 -16   2  2311189.30 2981.14   1
 -16   2  2417212.40 4724.76   1
 -16   2  25 39.5768 149.986   1
 -16   4   118155.90 4480.68   1
 -16   4   2101485.0 4733.54   1
 -16   4   312807.40 4228.90   1
 -16   4   4156348.0 7307.17   1
 -16   4   5 994.447 344.683   1
 -16   4   6 7128.41 2493.60   1
 -16   4   740079.30 7771.22   1
 -16   4   874473.50 4677.85   1
 -16   4   921760.10 4673.13   1
 -16   4  10164957.0 6993.80   1
 -16   4  1132205.30 6604.93   1
 -16   4  12242798.011250.00   1
 -16   4  1339521.30 6622.25   1
 -16   4  14 6739.76 1897.31   1
 -16   4  15 4948.63 1451.63   1
 -16   4  16 3572.39 1516.94   1
 -16   4  17 9784.86 3791.82   1
 -16   4  18 1707.47 531.233   1
 -16   4  1921928.00 4873.32   1
 -16   4  2013492.80 3394.99   1
 -16   4  21 309.532 135.856   1
 -16   4  22 8892.88 2789.80   1
 -16   4  23 6686.84 2343.30   1
 -16   4  24 4192.05 1426.12   1
 -16   6   112776.20 3699.36   1
 -16   6   2 5929.77 1697.93   1
 -16   6   315567.80 4530.80   1
 -16   6   4119159.0119159.0   1
 -16   6   5 52.7402 24.7367   1
 -16   6   685405.5028527.80   1
 -16   6   7 3177.24 811.846   1
 -16   6   8145731.0 6057.71   1
 -16   6   9 8192.12 2724.16   1
 -16   6  1017967.40 6192.34   1
 -16   6  11 1040.06 393.144   1
 -16   6  1217702.90 6091.68   1
 -16   6  13 4413.74 1340.93   1
 -16   6  14 8322.49 1993.59   1
 -16   6  15 3266.44 942.234   1
 -16   6  16 5836.48 1972.84   1
 -16   6  17 1605.31 561.174   1
 -16   6  18 3674.52 1239.40   1
 -16   6  19 528.645 177.156   1
 -16   6  2015378.80 4482.55   1
 -16   6  21 1107.57  413.16   1
 -16   6  22 1686.94  670.18   1
 -16   8   1 4147.13 1132.54   1
 -16   8   2 6937.38 1962.82   1
 -16   8   3 4345.64 1163.19   1
 -16   8   414026.30 3122.97   1
 -16   8   5 1015.50 574.672   1
 -16   8   6 3906.73 988.466   1
 -16   8   7 3099.80 1450.76   1
 -16   8   819235.30 4299.51   1
 -16   8   9 4756.01 1942.11   1
 -16   8  1024545.40 5194.04   1
 -16   8  11 4069.45 1191.03   1
 -16   8  1210889.20 2661.56   1
 -16   8  1317073.20 4046.59   1
 -16   8  14 1657.78 495.354   1
 -16   8  15 5148.56 1603.56   1
 -16   8  1631579.00 5715.71   1
 -16   8  17 5072.04 1517.63   1
 -16   8  1833114.30 6553.02   1
 -16   8  19 265.545 187.255   1
 -16  10   2 5914.52 2410.71   1
 -16  10   3 7429.34 2114.86   1
 -16  10   4 7635.99 2188.58   1
 -16  10   5 7025.19 4654.22   1
 -16  10   634989.60 8022.95   1
 -16  10   7 1054.85 402.198   1
 -16  10   8 3435.21 943.528   1
 -16  10   9 2289.61 599.838   1
 -16  10  10 2142.69 673.186   1
 -16  10  11 405.181 184.257   1
 -16  10  12 1485.60 467.162   1
 -16  10  13 1401.41 1401.90   1
 -15   1   1204168.0 7884.53   1
 -15   1   2 9991.34 2514.57   1
 -15   1   396115.90 3524.33   1
 -15   1   478343.20 4858.42   1
 -15   1   5 3454.90 853.971   1
 -15   1   630708.00 5619.12   1
 -15   1   7 6994.39 1719.39   1
 -15   1   8 1973.23 542.774   1
 -15   1   915626.20 3741.83   1
 -15   1  1088884.50 4977.92   1
 -15   1  1192381.00 5943.72   1
 -15   1  12116315.013937.30   1
 -15   1  13 840.002 235.783   1
 -15   1  14 2341.38 2341.81   1
 -15   1  15 3875.21 3875.72   1
 -15   1  1625381.90 8021.71   1
 -15   1  1733744.10 7836.59   1
 -15   1  18 324.147 114.796   1
 -15   1  1921350.30 6939.93   1
 -15   1  2035994.60 7118.02   1
 -15   1  2113785.80 4985.47   1
 -15   1  2215969.30 4091.05   1
 -15   1  23 6695.15 2685.01   1
 -15   1  24 457.555 180.269   1
 -15   1  2525192.80 5830.32   1
 -15   3   1135463.0 6415.58   1
 -15   3   210618.90 2483.10   1
 -15   3   3118252.0 5033.91   1
 -15   3   4 8179.74 2017.12   1
 -15   3   5 9419.37 2188.33   1
 -15   3   691585.30 8435.72   1
 -15   3   796572.00 5898.11   1
 -15   3   8 2145.51 663.193   1
 -15   3   944599.40 6822.93   1
 -15   3  1017051.50 4463.38   1
 -15   3  11 542.169 167.063   1
 -15   3  12 3149.29 1108.35   1
 -15   3  1361896.10 9056.95   1
 -15   3  1415293.80 4667.55   1
 -15   3  1514298.30 4473.23   1
 -15   3  1629210.20 7084.05   1
 -15   3  17 431.158 143.416   1
 -15   3  1826651.3026651.40   1
 -15   3  1972840.80 3714.67   1
 -15   3  20 8676.63 2411.14   1
 -15   3  2179805.30 8026.94   1
 -15   3  22 132.295 182.294   1
 -15   3  23 218.887   69.30   1
 -15   3  24 970.285 284.486   1
 -15   3  25 484.395 152.688   1
 -15   5   1-45.1256 300.864   1
 -15   5   218415.10 5014.65   1
 -15   5   377545.40 4936.05   1
 -15   5   4 5265.74 1673.36   1
 -15   5   512889.90 3039.74   1
 -15   5   6 2198.23 561.646   1
 -15   5   739287.80 5986.67   1
 -15   5   8 148.557 126.285   1
 -15   5   9 1510.07 422.438   1
 -15   5  10 1383.59 378.091   1
 -15   5  1136638.20 7143.44   1
 -15   5  12 5242.99 1376.44   1
 -15   5  1313706.80 3178.85   1
 -15   5  1440712.40 6185.72   1
 -15   5  1544031.90 9094.13   1
 -15   5  1618488.00 6274.64   1
 -15   5  1737866.90 6133.62   1
 -15   5  1815243.40 3747.36   1
 -15   5  19 2130.50 646.552   1
 -15   5  20 478.214 138.114   1
 -15   5  21 1331.09 446.394   1
 -15   5  22 344.885 132.578   1
 -15   5  23 249.512 126.695   1
 -15   7   117917.00 4682.87   1
 -15   7   214817.40 3818.02   1
 -15   7   358478.30 7462.80   1
 -15   7   4 1312.39 498.313   1
 -15   7   5119849.024626.60   1
 -15   7   6 1182.72 426.113   1
 -15   7   723024.10 5999.32   1
 -15   7   8 281.226 205.419   1
 -15   7   986459.7017145.90   1
 -15   7  1017195.40 5958.04   1
 -15   7  11100117.017423.50   1
 -15   7  1223255.80 4220.33   1
 -15   7  13 4534.90 1217.46   1
 -15   7  1411962.00 2875.23   1
 -15   7  15 5331.46 1392.16   1
 -15   7  16 1084.05 318.372   1
 -15   7  1720152.30 5290.37   1
 -15   7  18 8895.21 2842.59   1
 -15   7  19 5552.70 1750.93   1
 -15   7  20 613.318 195.715   1
 -15   7  21 757.018 275.896   1
 -15   9   1 8690.65 2294.30   1
 -15   9   218433.90 4299.67   1
 -15   9   3 9417.00 2487.34   1
 -15   9   428078.40 5484.30   1
 -15   9   527959.10 4703.26   1
 -15   9   617901.70 4262.12   1
 -15   9   716945.20 4549.52   1
 -15   9   811366.80 3586.25   1
 -15   9   918196.10 4952.05   1
 -15   9  10 346.473 344.162   1
 -15   9  11 7564.31 1827.64   1
 -15   9  12 129.812 74.0439   1
 -15   9  1321644.20 4354.89   1
 -15   9  14 865.205 248.588   1
 -15   9  1520122.60 4117.50   1
 -15   9  1610042.80 2997.36   1
 -15   9  1715205.50 4134.28   1
 -14   0   1 69.7736 141.921   1
 -14   0   2160707.0 7490.81   1
 -14   0   3 49.7346 278.617   1
 -14   0   453332.00 9898.89   1
 -14   0   5  215.00 336.898   1
 -14   0   613853.80 4665.92   1
 -14   0   7 168.118 80.1285   1
 -14   0   899193.60 4621.37   1
 -14   0   9 -5.7401 44.1086   1
 -14   0  10 5886.14 2110.04   1
 -14   0  11-44.5087 231.155   1
 -14   0  12113458.024104.70   1
 -14   0  13 539.715 636.805   1
 -14   0  1416410.70 6163.05   1
 -14   0  15-72.2928 74.1965   1
 -14   0  16 1102.47 494.107   1
 -14   0  17-42.4432 51.3335   1
 -14   0  1828529.90 8386.58   1
 -14   0  19 -15.774 20.7212   1
 -14   0  20 8680.19 8680.48   1
 -14   0  21 220.931 156.376   1
 -14   0  22 4187.97 1746.59   1
 -14   0  23  272.35 273.242   1
 -14   0  2470300.0014060.30   1
 -14   0  25 531.134 531.895   1
 -14   0  2617490.7017490.90   1
 -14   2   1 179.525 63.0541   1
 -14   2   249829.40 7142.02   1
 -14   2   348935.80 7347.86   1
 -14   2   4 148.227 44.6095   1
 -14   2   516830.70 3758.71   1
 -14   2   6 3433.41 897.773   1
 -14   2   7178273.013067.10   1
 -14   2   840384.30 6220.71   1
 -14   2   9160217.0 7424.47   1
 -14   2  1087147.80 4400.81   1
 -14   2  11 5614.73 1630.90   1
 -14   2  1237484.20 6469.70   1
 -14   2  13 94.2962 53.7694   1
 -14   2  14 352.607 165.306   1
 -14   2  1583687.5083687.50   1
 -14   2  1651437.50 7126.16   1
 -14   2  17 5456.85 1652.01   1
 -14   2  18101454.034075.40   1
 -14   2  1959231.40 7657.63   1
 -14   2  2065430.90 8594.09   1
 -14   2  21 1443.71 527.847   1
 -14   2  22 1614.03 445.987   1
 -14   2  23  62.209 154.748   1
 -14   2  24 284.801 88.2843   1
 -14   2  25 1024.61 338.738   1
 -14   4   190805.70 4334.63   1
 -14   4   2 4092.09 993.013   1
 -14   4   3 35.5372 109.101   1
 -14   4   410297.70 3344.57   1
 -14   4   513201.50 2876.21   1
 -14   4   6 8445.06 2134.22   1
 -14   4   714254.50 3464.04   1
 -14   4   835497.40 7876.32   1
 -14   4   915642.30 3463.37   1
 -14   4  1025032.40 5213.82   1
 -14   4  1175236.60 6119.71   1
 -14   4  12-18.7292  105.76   1
 -14   4  13 143.858  115.22   1
 -14   4  14 9971.10 2691.91   1
 -14   4  1560036.40 7098.86   1
 -14   4  16 6953.50 2346.57   1
 -14   4  17 5069.61 1732.22   1
 -14   4  18 6083.86 6084.43   1
 -14   4  19 193.721 72.0631   1
 -14   4  20 6802.64 1937.97   1
 -14   4  21 4386.25 1555.38   1
 -14   4  22 6269.10 2030.66   1
 -14   4  23 7503.65 2416.90   1
 -14   4  24 8043.75 2528.24   1
 -14   6   132607.10 5501.01   1
 -14   6   240613.50 6658.44   1
 -14   6   314288.50 3912.79   1
 -14   6   469480.10 7272.52   1
 -14   6   519444.10 4323.22   1
 -14   6   611183.50 2845.32   1
 -14   6   776559.7024120.80   1
 -14   6   8 1321.91 462.288   1
 -14   6   9 3876.06 945.416   1
 -14   6  10 5234.33 1909.90   1
 -14   6  11 95.9444 254.582   1
 -14   6  1285492.80 9449.23   1
 -14   6  13 7534.25 1848.40   1
 -14   6  1416602.30 4074.97   1
 -14   6  15 4942.75 1712.16   1
 -14   6  1611626.10 3069.70   1
 -14   6  17 9519.25 2600.35   1
 -14   6  18 6995.39 1892.90   1
 -14   6  19 4490.87 1678.29   1
 -14   6  2023612.90 5741.26   1
 -14   6  21 301.928 461.189   1
 -14   6  22 1178.07 425.175   1
 -14   6  23 219.708 136.321   1
 -14   8   1 3329.29 1751.69   1
 -14   8   231563.70 5613.65   1
 -14   8   3 4972.55 1756.57   1
 -14   8   410747.20 3931.95   1
 -14   8   540969.30 7197.12   1
 -14   8   611714.20 4402.90   1
 -14   8   7 9905.55 3863.19   1
 -14   8   830352.10 8252.45   1
 -14   8   917523.4012788.30   1
 -14   8  10104255.0 7785.94   1
 -14   8  1116659.30 4227.26   1
 -14   8  1227395.80 5455.54   1
 -14   8  1314552.90 3512.08   1
 -14   8  1429594.40 5600.73   1
 -14   8  1512278.30 6858.46   1
 -14   8  1687903.30 5060.93   1
 -14   8  17 148.433 424.086   1
 -14   8  1818755.70 5148.66   1
 -14   8  19 196.567 161.629   1
 -14   8  20 646.506 285.436   1
 -14  10   1 1745.72 687.513   1
 -14  10   2 3516.92 1086.57   1
 -14  10   3 1452.31 935.064   1
 -14  10   479995.70 4023.35   1
 -14  10   513700.00 7013.86   1
 -14  10   618785.60 4078.34   1
 -14  10   7 673.321 738.665   1
 -14  10   8 710.955 275.619   1
 -14  10   9 1511.53 519.001   1
 -14  10  10 484.436  274.99   1
 -14  10  11 376.641 249.609   1
 -14  10  12 483.533 184.167   1
 -14  10  13 4638.28 1229.95   1
 -14  10  14 5353.45 1420.02   1
 -14  10  15 565.502  722.73   1
 -13   1   1 476.088 135.475   1
 -13   1   221176.60 4484.23   1
 -13   1   329220.60 6209.52   1
 -13   1   439800.50 6791.19   1
 -13   1   529722.30 6346.06   1
 -13   1   6 1385.77 378.325   1
 -13   1   743596.80 6800.02   1
 -13   1   824946.40 5498.06   1
 -13   1   9163053.0 9667.51   1
 -13   1  10 3360.88 838.917   1
 -13   1  1144739.10 7484.73   1
 -13   1  1223202.40 5266.04   1
 -13   1  13 1701.70 560.617   1
 -13   1  14 5443.37 1643.46   1
 -13   1  15 159.219 62.9127   1
 -13   1  16 324.389 178.826   1
 -13   1  1756873.80 7243.31   1
 -13   1  18-27.8534 196.197   1
 -13   1  1935591.80 6806.54   1
 -13   1  2019054.70 6418.27   1
 -13   1  21 529.981 212.852   1
 -13   1  2230161.90 5573.26   1
 -13   1  23 4597.93 1903.27   1
 -13   1  2423447.30 5450.87   1
 -13   1  2546767.30 7665.50   1
 -13   1  26 278.494 279.695   1
 -13   3   1164545.0 6280.35   1
 -13   3   2  450.65 339.616   1
 -13   3   3 8860.68 2400.20   1
 -13   3   4 286.207 94.6186   1
 -13   3   557042.90 7412.83   1
 -13   3   6101813.0 3991.89   1
 -13   3   7525788.020478.80   1
 -13   3   8436502.017318.70   1
 -13   3   9 7111.08 1930.85   1
 -13   3  10 17.5033  17.383   1
 -13   3  1115558.10 3930.25   1
 -13   3  1233578.30 7070.33   1
 -13   3  1377306.80 5313.36   1
 -13   3  14 2057.30 919.187   1
 -13   3  1570893.1070893.20   1
 -13   3  1640977.00 8272.98   1
 -13   3  17 6840.96 1992.08   1
 -13   3  18 449.099 391.587   1
 -13   3  1983188.3017699.40   1
 -13   3  20 214.357 215.869   1
 -13   3  2118151.60 4925.85   1
 -13   3  22 9791.18 3011.45   1
 -13   3  2337822.70 6702.75   1
 -13   3  24 6577.00 2129.48   1
 -13   3  25 501.191 216.625   1
 -13   5   1 2325.17 879.867   1
 -13   5   2 983.378 299.513   1
 -13   5   316468.10 4826.76   1
 -13   5   4 3335.87 929.535   1
 -13   5   5 240.849 252.703   1
 -13   5   6 381.572  135.24   1
 -13   5   713230.90 2983.15   1
 -13   5   8 8428.07 2143.71   1
 -13   5   9 7027.48 1647.06   1
 -13   5  10 2422.12 751.503   1
 -13   5  1176052.00 5715.56   1
 -13   5  12 297.522 133.089   1
 -13   5  13 8036.49 1933.11   1
 -13   5  14 1538.95 382.088   1
 -13   5  1565326.30 4833.26   1
 -13   5  1652002.90 6100.92   1
 -13   5  1725818.30 7747.25   1
 -13   5  18 5698.60 2337.74   1
 -13   5  19 8595.16 2793.33   1
 -13   5  20 2234.30  744.30   1
 -13   5  21 1419.36 527.952   1
 -13   5  22 247.355 92.2106   1
 -13   5  2310854.80 3375.86   1
 -13   5  24 223.921 144.183   1
 -13   7   120263.40 4170.01   1
 -13   7   218282.50 9146.30   1
 -13   7   3111952.0 8561.51   1
 -13   7   4 556.462 263.916   1
 -13   7   5 586.943 196.507   1
 -13   7   6 7920.02 2391.82   1
 -13   7   710508.00 2343.20   1
 -13   7   8 793.737 258.549   1
 -13   7   995347.9010986.10   1
 -13   7  1018774.5012566.00   1
 -13   7  11108346.0 5731.11   1
 -13   7  12 4579.96 1420.63   1
 -13   7  1310137.50 3919.27   1
 -13   7  14 9814.68 3798.54   1
 -13   7  1526532.70 5432.66   1
 -13   7  16 290.333 150.481   1
 -13   7  1713335.30 3390.39   1
 -13   7  18 57.6766 152.576   1
 -13   7  1928766.20 6305.83   1
 -13   7  20 114.121 106.543   1
 -13   7  2119625.10 5241.96   1
 -13   7  22 2969.43 2969.60   1
 -13   9   1 1461.00  406.76   1
 -13   9   2 478.021 184.931   1
 -13   9   3  494.72  167.31   1
 -13   9   4 1444.15  387.50   1
 -13   9   5 2513.19 627.417   1
 -13   9   6 168.447 196.537   1
 -13   9   732362.70 4697.72   1
 -13   9   8 2470.16 644.364   1
 -13   9   9 197.966 109.223   1
 -13   9  10 1926.35 576.164   1
 -13   9  11 5219.40 1085.93   1
 -13   9  1212152.00 2820.24   1
 -13   9  13 4798.62 1383.96   1
 -13   9  14 872.197 334.757   1
 -13   9  1528378.30 5409.65   1
 -13   9  16 9305.80 2517.25   1
 -13   9  17 4743.83 1573.39   1
 -13   9  18 619.443 227.899   1
 -13  11   131846.70 5642.48   1
 -13  11   2 9727.98 4928.98   1
 -13  11   320152.70 4619.71   1
 -13  11   4 4632.38 2123.90   1
 -13  11   5 7206.01 1810.30   1
 -13  11   6 1797.47 1066.92   1
 -13  11   7 1055.03 817.877   1
 -13  11   8 570.231 489.333   1
 -13  11   9 2741.54 1025.12   1
 -13  11  10 7102.56 1807.48   1
 -13  11  11 6506.18 1933.19   1
 -13  11  1211135.8011136.00   1
 -12   0   1-42.2315 146.535   1
 -12   0   298614.30 7921.00   1
 -12   0   3 141.225 69.2377   1
 -12   0   4613591.0613591.0   1
 -12   0   5-17.5421 67.4043   1
 -12   0   6372083.017330.70   1
 -12   0   7 142.539 54.2679   1
 -12   0   862356.3011023.10   1
 -12   0   9 153.894 126.118   1
 -12   0  1038775.30 8998.11   1
 -12   0  11 165.313 93.4308   1
 -12   0  1271794.1013221.90   1
 -12   0  13-72.8571 332.608   1
 -12   0  14140313.0140313.0   1
 -12   0  15 398.235 398.492   1
 -12   0  1644594.2044594.20   1
 -12   0  17-45.6056 48.4438   1
 -12   0  1829938.8029938.80   1
 -12   0  21-69.1861 70.7804   1
 -12   0  22 780.104 780.575   1
 -12   0  23 282.556 291.688   1
 -12   0  2418779.8018779.90   1
 -12   0  25-121.376 124.599   1
 -12   0  2612072.4012073.10   1
 -12   2   143239.10 6989.51   1
 -12   2   2168630.0 6519.44   1
 -12   2   3 60.0268 93.0289   1
 -12   2   412277.50 3307.99   1
 -12   2   573402.20 8904.92   1
 -12   2   6175263.0 7395.87   1
 -12   2   7408510.017290.10   1
 -12   2   8238427.013901.90   1
 -12   2   960459.50 7457.34   1
 -12   2  10216432.0 8393.18   1
 -12   2  1152438.60 7738.95   1
 -12   2  12 806.159 270.444   1
 -12   2  1334327.30 6726.53   1
 -12   2  14 3956.85 1051.24   1
 -12   2  15 223.912 101.467   1
 -12   2  16108079.0 9734.58   1
 -12   2  1726015.10 6871.46   1
 -12   2  18106646.0 4931.77   1
 -12   2  1912395.10 3367.75   1
 -12   2  2018417.80 5273.07   1
 -12   2  21 3350.20 1152.03   1
 -12   2  22 1895.22 851.537   1
 -12   2  23 4343.70 1475.42   1
 -12   2  2440689.80 6696.18   1
 -12   2  25 997.437 436.762   1
 -12   4   126987.10 5926.82   1
 -12   4   220522.30 4484.69   1
 -12   4   3 111.554  62.767   1
 -12   4   434062.70 6723.57   1
 -12   4   510554.30 2819.45   1
 -12   4   6206840.0 8028.12   1
 -12   4   7 5191.26 1567.32   1
 -12   4   8103274.0 3796.59   1
 -12   4   945904.70 6661.23   1
 -12   4  1072257.10 5773.56   1
 -12   4  11 806.227  212.46   1
 -12   4  1235970.90 6634.17   1
 -12   4  1366375.00 6207.03   1
 -12   4  1474744.50 6995.68   1
 -12   4  1534241.10 6897.52   1
 -12   4  16  331.15  149.07   1
 -12   4  1713384.10 3518.64   1
 -12   4  1838589.70 7433.13   1
 -12   4  19-6.09501 174.517   1
 -12   4  2036041.10 8580.51   1
 -12   4  21 488.019 360.395   1
 -12   4  2241627.00 6699.55   1
 -12   4  23 2760.59 940.872   1
 -12   4  2415042.30 4346.76   1
 -12   4  25 701.651 702.186   1
 -12   6   145089.60 7934.95   1
 -12   6   2 9761.55 3939.69   1
 -12   6   3-28.6208 55.8598   1
 -12   6   4 1535.06 418.289   1
 -12   6   5 6358.50 1787.78   1
 -12   6   620183.90 4790.06   1
 -12   6   7 3762.77 1075.77   1
 -12   6   8  776.24 181.602   1
 -12   6   913709.20 3759.99   1
 -12   6  10 1826.71 502.979   1
 -12   6  1144722.40 7478.10   1
 -12   6  12 617.494 209.906   1
 -12   6  13 3996.26 1016.65   1
 -12   6  1429691.30 5334.00   1
 -12   6  15 1111.98 364.383   1
 -12   6  1672769.70 6124.04   1
 -12   6  1717923.60 4209.49   1
 -12   6  1835185.40 6839.44   1
 -12   6  19 3370.70 1113.76   1
 -12   6  20 393.527 149.851   1
 -12   6  21 2015.15 700.261   1
 -12   6  22 839.198 305.909   1
 -12   6  23 8433.69 2781.68   1
 -12   8   112223.80 4585.39   1
 -12   8   2 9047.06 3563.36   1
 -12   8   3 3972.37 1095.14   1
 -12   8   4 473.583 397.532   1
 -12   8   5 7464.49 1982.71   1
 -12   8   6 3217.01 848.608   1
 -12   8   7 422.703 199.953   1
 -12   8   820803.60 4296.26   1
 -12   8   9 6801.86 4660.21   1
 -12   8  10120666.012820.00   1
 -12   8  1153604.80 7033.54   1
 -12   8  1252041.50 5829.56   1
 -12   8  13 2487.29 770.321   1
 -12   8  14 3434.85 951.412   1
 -12   8  15 6166.03 1580.72   1
 -12   8  16 3322.43 984.313   1
 -12   8  17 6772.85 1923.95   1
 -12   8  18 609.404 196.257   1
 -12   8  19 284.735 229.209   1
 -12   8  2037237.00 6738.69   1
 -12  10   1 8773.70 2824.78   1
 -12  10   221726.20 4859.99   1
 -12  10   3 6388.50 1714.52   1
 -12  10   418558.70 4352.94   1
 -12  10   5 8158.51 1741.57   1
 -12  10   6 1737.87 459.853   1
 -12  10   7 8563.85 2556.50   1
 -12  10   830714.90 5301.32   1
 -12  10   910867.70 2790.01   1
 -12  10  10 7726.58 1961.17   1
 -12  10  11 7128.43 1855.24   1
 -12  10  12 5158.99 1464.38   1
 -12  10  13 164.417 124.596   1
 -12  10  1415948.60 3865.65   1
 -12  10  15 1467.54 594.666   1
 -12  10  1614461.70 3548.20   1
 -11   1   1177781.0 8085.69   1
 -11   1   211398.90 3260.86   1
 -11   1   3181700.0 7637.72   1
 -11   1   441062.00 8302.68   1
 -11   1   5100218.0 6783.08   1
 -11   1   6145888.0 7580.73   1
 -11   1   7 423.615 256.213   1
 -11   1   8 5310.05 1444.99   1
 -11   1   9 653.869 189.215   1
 -11   1  1026494.80 6196.21   1
 -11   1  1199191.60 6794.97   1
 -11   1  12 67.1747  31.441   1
 -11   1  13 8451.42 2304.62   1
 -11   1  14 195.058 161.319   1
 -11   1  1529854.00 6810.03   1
 -11   1  1668791.00 6267.94   1
 -11   1  1724707.80 8039.79   1
 -11   1  18-19.4001 253.217   1
 -11   1  1935843.60 7180.90   1
 -11   1  20 2355.61 856.986   1
 -11   1  21 257.879 104.855   1
 -11   1  2269198.20 5991.54   1
 -11   1  2311566.20 3355.34   1
 -11   1  24-259.724 310.827   1
 -11   1  2515779.70 5446.01   1
 -11   1  26 3088.68 1314.77   1
 -11   3   1363893.014211.00   1
 -11   3   245278.50 8261.18   1
 -11   3   3 261.302 101.171   1
 -11   3   4 3760.37 1216.76   1
 -11   3   5192085.0 7527.17   1
 -11   3   699101.20 4939.23   1
 -11   3   7253535.0 9824.79   1
 -11   3   8 3329.38 975.826   1
 -11   3   9106133.0 4112.23   1
 -11   3  10130098.0 5070.46   1
 -11   3  1139459.30 7172.31   1
 -11   3  12 6658.99 1792.37   1
 -11   3  13234473.011836.80   1
 -11   3  1493414.40 9335.83   1
 -11   3  15272019.065104.10   1
 -11   3  1612987.90 3971.56   1
 -11   3  1726267.70 8170.24   1
 -11   3  18 7690.72 2240.77   1
 -11   3  19 565.871 205.866   1
 -11   3  20 388.367  139.83   1
 -11   3  21 6766.75 2724.30   1
 -11   3  22 234.756 136.436   1
 -11   3  2340888.80 6665.59   1
 -11   3  24 1804.14 659.765   1
 -11   3  25 5357.57 1694.51   1
 -11   5   172364.50 6372.81   1
 -11   5   2 6549.04 1616.18   1
 -11   5   321521.70 5205.07   1
 -11   5   423729.10 5043.97   1
 -11   5   537752.80 6877.71   1
 -11   5   611322.50 2873.97   1
 -11   5   7 1541.55 407.027   1
 -11   5   8 1712.38 653.409   1
 -11   5   9123437.0 7957.68   1
 -11   5  1010904.60 2701.55   1
 -11   5  1165611.40 6095.71   1
 -11   5  1247839.10 7589.46   1
 -11   5  13 2543.51  845.24   1
 -11   5  1422137.60 5342.34   1
 -11   5  15 3235.38 878.008   1
 -11   5  16 2635.05 669.744   1
 -11   5  1749260.90 7252.69   1
 -11   5  18 2185.64  758.01   1
 -11   5  1925970.80 6227.26   1
 -11   5  20 6949.29 2309.02   1
 -11   5  21 2576.00  900.35   1
 -11   5  22 207.591 105.388   1
 -11   5  23 5459.18 1831.72   1
 -11   5  24 1637.21 711.933   1
 -11   7   1 6343.91 6344.00   1
 -11   7   288537.80 4192.46   1
 -11   7   3101345.0 4434.43   1
 -11   7   411231.20 3364.72   1
 -11   7   532679.50 7748.17   1
 -11   7   626555.20 5947.41   1
 -11   7   747572.50 9998.86   1
 -11   7   8 1603.16 397.486   1
 -11   7   910414.10 2103.25   1
 -11   7  1031936.30 5541.38   1
 -11   7  11 181.458 74.0156   1
 -11   7  12 2552.48 778.266   1
 -11   7  1376179.40 6548.92   1
 -11   7  14 3200.91 1098.65   1
 -11   7  1526935.40 6300.43   1
 -11   7  16 1289.03 415.395   1
 -11   7  1717576.80 4234.70   1
 -11   7  18 6242.20 2079.41   1
 -11   7  1916683.20 4492.05   1
 -11   7  20 184.085 188.792   1
 -11   7  21 8921.21 2779.58   1
 -11   7  22 2100.09  907.06   1
 -11   9   1 4916.98 1364.35   1
 -11   9   213307.10 4244.94   1
 -11   9   3 2778.49 1213.69   1
 -11   9   411842.20 3069.20   1
 -11   9   5 4000.01 1950.20   1
 -11   9   617322.20 5019.61   1
 -11   9   731615.30 5949.18   1
 -11   9   8 222.191 222.715   1
 -11   9   941643.00 8760.24   1
 -11   9  10 730.825 372.396   1
 -11   9  11 3763.58 1118.69   1
 -11   9  12 1385.79 427.423   1
 -11   9  13 5737.82 1426.32   1
 -11   9  14 113.326 80.0379   1
 -11   9  15 2950.20 874.427   1
 -11   9  16 5080.85 1467.16   1
 -11   9  17 644.962 267.694   1
 -11   9  18 444.263 233.696   1
 -11   9  1915864.00 5468.42   1
 -11  11   1 200.015 140.061   1
 -11  11   2 4302.26 2391.34   1
 -11  11   317278.80 3751.24   1
 -11  11   413235.40 3139.80   1
 -11  11   536813.90 5081.44   1
 -11  11   6 7843.61 3070.83   1
 -11  11   714138.20 2892.57   1
 -11  11   813785.60 2854.71   1
 -11  11   914210.80 3013.67   1
 -11  11  10 70.3843 192.102   1
 -11  11  1114824.30 3324.67   1
 -11  11  12 175.377 260.948   1
 -11  11  1313479.80 3458.18   1
 -10   0   1 130.837 75.6707   1
 -10   0   2102481.0102481.0   1
 -10   0   3  36.641  209.79   1
 -10   0   431275.60 9587.18   1
 -10   0   5  15.848 163.834   1
 -10   0   6150326.0 8298.39   1
 -10   0   7 318.459 287.184   1
 -10   0   8353502.020069.80   1
 -10   0   9-213.467 370.356   1
 -10   0  10587781.0587781.0   1
 -10   0  11 13.5088 8.31211   1
 -10   0  1243522.0012405.90   1
 -10   0  13 307.949 146.759   1
 -10   0  1489719.00 6817.02   1
 -10   0  15  275.46 275.768   1
 -10   0  1617120.80 6385.44   1
 -10   0  17 156.238 291.553   1
 -10   0  1877110.3077110.40   1
 -10   0  19 58.5153 138.977   1
 -10   0  20 5243.27 2181.47   1
 -10   0  21 286.728 126.907   1
 -10   0  22 486.941  487.83   1
 -10   0  2698213.2098213.40   1
 -10   2   1 9613.26 2817.59   1
 -10   2   221871.60 6078.54   1
 -10   2   3302050.013886.40   1
 -10   2   490396.40 8447.00   1
 -10   2   517895.80 4518.48   1
 -10   2   6187952.0 7319.50   1
 -10   2   7103810.0 6618.97   1
 -10   2   8 5871.78 1763.92   1
 -10   2   9 1239.84 367.119   1
 -10   2  10136931.0 7083.06   1
 -10   2  11 1732.14 497.971   1
 -10   2  12166631.0 6480.76   1
 -10   2  1384699.80 5592.77   1
 -10   2  1438484.20 6423.24   1
 -10   2  1583551.70 7672.60   1
 -10   2  16 3804.32 1201.19   1
 -10   2  17 4395.11 1361.10   1
 -10   2  18 8715.32 2881.78   1
 -10   2  19-45.5538 302.932   1
 -10   2  20 714.309 230.968   1
 -10   2  21 1696.58 581.558   1
 -10   2  2247100.00 6862.49   1
 -10   2  2315005.10 5274.46   1
 -10   2  2421494.90 6692.83   1
 -10   2  25 2549.94 1091.21   1
 -10   4   133570.80 6358.01   1
 -10   4   2 379.892 129.889   1
 -10   4   3 849.189 238.489   1
 -10   4   4 241.782 105.093   1
 -10   4   554666.90 8468.56   1
 -10   4   6 321.931 85.1416   1
 -10   4   7 2596.94 744.285   1
 -10   4   874546.70 6873.83   1
 -10   4   925188.70 5785.03   1
 -10   4  1067063.40 6865.69   1
 -10   4  11 5751.65 1437.19   1
 -10   4  1221689.80 4319.78   1
 -10   4  13159790.0 6720.40   1
 -10   4  14 516.208 160.303   1
 -10   4  1513835.00 4097.19   1
 -10   4  1642876.30 6999.96   1
 -10   4  1745673.80 7691.88   1
 -10   4  1856207.10 5911.50   1
 -10   4  19 4840.45 2016.47   1
 -10   4  20 2789.98 1190.32   1
 -10   4  2124230.90 5885.05   1
 -10   4  2216437.10 4695.65   1
 -10   4  2320041.30 5517.92   1
 -10   4  2419469.80 6279.13   1
 -10   6   1 113.465 68.8123   1
 -10   6   217619.10 6596.52   1
 -10   6   315241.50 4283.88   1
 -10   6   450051.70 8301.80   1
 -10   6   515664.30 4205.54   1
 -10   6   647828.50 7984.80   1
 -10   6   722562.20 4552.05   1
 -10   6   838188.10 6084.69   1
 -10   6   937067.30 5622.26   1
 -10   6  10 1213.89 364.454   1
 -10   6  11 820.181 263.211   1
 -10   6  12 1841.50 604.933   1
 -10   6  1318601.40 4351.69   1
 -10   6  14111113.0 5216.77   1
 -10   6  1511325.30 2720.84   1
 -10   6  1617623.00 4777.70   1
 -10   6  17 2339.21 840.848   1
 -10   6  1828819.90 6588.40   1
 -10   6  19 258.214 159.061   1
 -10   6  2011626.50 3565.33   1
 -10   6  21 2107.61 752.437   1
 -10   6  22 1960.22 844.976   1
 -10   6  23 38.3735  411.95   1
 -10   8   1 3219.08 2742.09   1
 -10   8   2107465.0 6851.39   1
 -10   8   3 2689.76 2689.90   1
 -10   8   4144353.0 7873.52   1
 -10   8   524834.7031882.40   1
 -10   8   648110.90 6727.09   1
 -10   8   7 9978.81 4871.13   1
 -10   8   852711.20 6770.43   1
 -10   8   950944.80 5503.55   1
 -10   8  1039269.20 5333.29   1
 -10   8  1135267.70 6301.82   1
 -10   8  1226310.20 6482.95   1
 -10   8  13 250.618 79.1196   1
 -10   8  1429317.70 5825.84   1
 -10   8  15 1867.69 568.649   1
 -10   8  16 406.206 145.519   1
 -10   8  17 3122.92 1159.49   1
 -10   8  18 3121.32 1152.80   1
 -10   8  19 127.042 145.392   1
 -10   8  2045381.9045382.00   1
 -10  10   133309.10 5236.69   1
 -10  10   241584.40 6144.90   1
 -10  10   3 1365.13 644.363   1
 -10  10   4 2483.94 672.961   1
 -10  10   5 7181.39 1780.21   1
 -10  10   6 7204.58 2125.80   1
 -10  10   712474.70 2718.53   1
 -10  10   814997.20 3743.14   1
 -10  10   912105.40 3250.84   1
 -10  10  10 5088.67 1418.46   1
 -10  10  11 560.871 215.381   1
 -10  10  12 6307.37 1878.26   1
 -10  10  13 591.261 184.544   1
 -10  10  1412610.10 3283.97   1
 -10  10  15 686.321 290.895   1
 -10  10  1618051.70 4194.32   1
 -10  10  17 292.656  293.00   1
 -10  12   1 182.514 434.261   1
 -10  12   2 2603.22 798.623   1
 -10  12   3 8518.31 3841.56   1
 -10  12   435327.10 5030.97   1
 -10  12   515818.10 3632.47   1
 -10  12   647757.30 4763.54   1
 -10  12   7 2120.67 866.957   1
 -10  12   8 7442.12 1937.70   1
 -10  12   9 731.193 322.744   1
  -9   1   165547.5013105.00   1
  -9   1   271379.2010546.70   1
  -9   1   3 4082.34 1268.02   1
  -9   1   4 2068.30 697.697   1
  -9   1   659709.1016635.20   1
  -9   1   7296912.012338.80   1
  -9   1   810202.00 2721.89   1
  -9   1   9105459.0 6923.17   1
  -9   1  1061800.10 9112.13   1
  -9   1  1197285.30 6053.66   1
  -9   1  12221480.014263.80   1
  -9   1  13 570.093 180.107   1
  -9   1  14 396.642 101.962   1
  -9   1  15 3069.50 886.518   1
  -9   1  16178026.015099.90   1
  -9   1  1751057.00 7048.40   1
  -9   1  18 117.526 47.6846   1
  -9   1  1913965.60 4189.87   1
  -9   1  2017653.70 4032.27   1
  -9   1  2146614.4046614.50   1
  -9   1  22 79.9586 99.8122   1
  -9   1  2349324.30 7801.17   1
  -9   1  24 3292.55 1389.30   1
  -9   1  2516203.20 5549.43   1
  -9   3   1128197.0 4687.21   1
  -9   3   2127007.0 5408.15   1
  -9   3   3 7172.06 2182.18   1
  -9   3   4  340.09 136.362   1
  -9   3   531695.30 7295.27   1
  -9   3   6 4880.35 1750.45   1
  -9   3   775310.70 8256.89   1
  -9   3   825236.00 5420.06   1
  -9   3   9268682.0 9916.05   1
  -9   3  10 4324.15 1117.49   1
  -9   3  11 340.992 98.5029   1
  -9   3  1215611.80 4089.63   1
  -9   3  1382407.10 5901.26   1
  -9   3  14 2906.40  854.26   1
  -9   3  15 1349.12 374.063   1
  -9   3  16 8454.50 2882.93   1
  -9   3  17 9628.42 2519.14   1
  -9   3  1832989.40 8976.75   1
  -9   3  19 447.657 170.236   1
  -9   3  20 108.513 48.6603   1
  -9   3  2123451.90 5784.38   1
  -9   3  2210235.70 3895.49   1
  -9   3  23 6352.17 2137.55   1
  -9   3  24 480.948 211.822   1
  -9   3  2510815.7010815.80   1
  -9   5   1 3416.63 964.008   1
  -9   5   216616.40 4084.06   1
  -9   5   338350.90 7710.20   1
  -9   5   433724.90 6429.96   1
  -9   5   565994.60 7194.19   1
  -9   5   6 1727.45 557.412   1
  -9   5   7 7725.10 2420.18   1
  -9   5   820652.70 4566.99   1
  -9   5   923600.70 4847.19   1
  -9   5  10 1121.54 302.688   1
  -9   5  11 1699.40 415.512   1
  -9   5  12 277.961 121.845   1
  -9   5  1312421.50 3134.70   1
  -9   5  1415796.30 4805.10   1
  -9   5  15 4607.07 1212.18   1
  -9   5  16 9067.05 2561.27   1
  -9   5  1713051.50 4004.25   1
  -9   5  1886190.50 8086.73   1
  -9   5  19 3446.44 1457.48   1
  -9   5  20 5371.50 1713.71   1
  -9   5  21 9572.34 2951.22   1
  -9   5  2224950.60 7269.35   1
  -9   5  2317251.00 5798.79   1
  -9   5  24  514.00 289.653   1
  -9   7   128604.20 6703.97   1
  -9   7   2 9791.10 2366.38   1
  -9   7   375345.10 7550.70   1
  -9   7   4 4865.77 3539.52   1
  -9   7   5139008.0 8099.86   1
  -9   7   650793.4011193.20   1
  -9   7   723780.50 4986.48   1
  -9   7   813563.90 3073.81   1
  -9   7   9 95.5495 52.0266   1
  -9   7  10 6822.48 1993.52   1
  -9   7  1129108.30 5335.46   1
  -9   7  1217165.10 5574.21   1
  -9   7  13163529.012647.80   1
  -9   7  1419868.70 4801.96   1
  -9   7  1530606.2030606.30   1
  -9   7  1626184.40 5475.32   1
  -9   7  1723358.40 5035.65   1
  -9   7  18 3965.25 1158.76   1
  -9   7  1916588.70 4518.26   1
  -9   7  20 189.128 84.1087   1
  -9   7  2121104.20 6599.27   1
  -9   7  22 5582.60 2285.92   1
  -9   9   1223051.014323.60   1
  -9   9   2144280.0 7964.61   1
  -9   9   322490.3019025.70   1
  -9   9   4 2821.53 725.907   1
  -9   9   5 3473.34 863.738   1
  -9   9   6 809.306 590.674   1
  -9   9   7 6470.98 1667.57   1
  -9   9   8 1057.51 283.204   1
  -9   9   934832.10 5429.03   1
  -9   9  10 1531.32 466.691   1
  -9   9  11 209.238 103.207   1
  -9   9  12 8341.98 3514.54   1
  -9   9  1343354.70 6638.66   1
  -9   9  14 550.274 170.709   1
  -9   9  1515988.50 4523.73   1
  -9   9  16 135.104 107.703   1
  -9   9  17 4978.06 1444.10   1
  -9   9  18 177.962 138.443   1
  -9   9  1936368.80 8000.08   1
  -9  11   1 2237.80 659.503   1
  -9  11   2 6816.06 4358.15   1
  -9  11   345271.40 8585.62   1
  -9  11   475585.30 4971.10   1
  -9  11   517645.60 6512.04   1
  -9  11   6 2661.07 663.852   1
  -9  11   7 1245.09 307.864   1
  -9  11   8 629.259 216.701   1
  -9  11   9 5806.92 1471.72   1
  -9  11  10 2601.44 718.799   1
  -9  11  11 9670.39 2599.79   1
  -9  11  12 3211.66 937.051   1
  -9  11  13 6798.58 1877.06   1
  -9  11  14 4119.21 1147.46   1
  -8   0   1 352.545 309.835   1
  -8   0   2316166.014815.50   1
  -8   0   3-6.60988 35.7778   1
  -8   0   4 1128.40 479.544   1
  -8   0   5-158.217 120.574   1
  -8   0   6323124.026127.20   1
  -8   0   7 176.322 97.7421   1
  -8   0   9 -8.9582 19.3307   1
  -8   0  1089362.4013556.60   1
  -8   0  11 112.935 79.2256   1
  -8   0  12107419.0 7093.55   1
  -8   0  13  94.336 224.756   1
  -8   0  14 8776.03 3089.32   1
  -8   0  15  192.53  247.51   1
  -8   0  16 2946.47 1318.17   1
  -8   0  17-27.3998  33.312   1
  -8   0  1867541.5067541.50   1
  -8   0  19 103.283 47.3736   1
  -8   0  2023413.00 7388.47   1
  -8   0  21 47.1713 50.1687   1
  -8   0  23 209.608 211.218   1
  -8   0  24 1674.30 1674.84   1
  -8   2   1 440.229 287.884   1
  -8   2   251971.9010156.60   1
  -8   2   3114924.0 8455.21   1
  -8   2   4946240.02583571.   1
  -8   2   573674.2014765.50   1
  -8   2   6105228.014104.30   1
  -8   2   7321784.0321784.0   1
  -8   2   8 4688.39 1559.05   1
  -8   2   9 525.312 186.446   1
  -8   2  10 2013.26 661.311   1
  -8   2  11127790.0 6042.90   1
  -8   2  12 2376.02 680.245   1
  -8   2  13 1440.66 407.038   1
  -8   2  1421853.60 4580.54   1
  -8   2  15 4053.43 1248.81   1
  -8   2  1658506.80 6394.88   1
  -8   2  17 2679.39 842.665   1
  -8   2  1814983.40 3775.51   1
  -8   2  1918053.80 6278.85   1
  -8   2  20 3211.14 1369.50   1
  -8   2  21 5984.77 2441.82   1
  -8   2  2225315.00 5925.07   1
  -8   2  2314454.00 5124.21   1
  -8   2  24 3166.60 3167.28   1
  -8   2  25 2681.09 2682.21   1
  -8   4   1 172.432 50.8989   1
  -8   4   263310.7010155.50   1
  -8   4   3233306.0 9850.63   1
  -8   4   4342383.013475.80   1
  -8   4   573873.20 9084.95   1
  -8   4   637398.70 7245.16   1
  -8   4   7136397.0 5027.46   1
  -8   4   853879.10 8015.92   1
  -8   4   9 9910.96 2555.36   1
  -8   4  1022037.00 4752.65   1
  -8   4  11 2094.27 579.017   1
  -8   4  12 1276.03 354.981   1
  -8   4  13 2492.29 674.439   1
  -8   4  1451551.70 8051.92   1
  -8   4  15 5626.52 1696.68   1
  -8   4  16322342.018234.00   1
  -8   4  1732156.20 6340.75   1
  -8   4  1824149.20 6162.54   1
  -8   4  19 1779.06 1779.41   1
  -8   4  2015208.00 4298.07   1
  -8   4  21 201.908  289.45   1
  -8   4  2251089.90 7490.98   1
  -8   4  23 4410.43 1831.08   1
  -8   4  2427961.6027961.70   1
  -8   6   119622.00 6175.22   1
  -8   6   232395.20 6650.82   1
  -8   6   323160.00 4908.31   1
  -8   6   4 3540.60 814.078   1
  -8   6   525385.50 5278.57   1
  -8   6   6 2857.20 818.975   1
  -8   6   7138552.0 7428.60   1
  -8   6   872496.40 6200.36   1
  -8   6   9217650.017378.10   1
  -8   6  10 4766.43 1215.59   1
  -8   6  11 2233.96 647.095   1
  -8   6  12174410.013023.30   1
  -8   6  13  155.04 107.987   1
  -8   6  1421317.60 4520.04   1
  -8   6  15 7046.29 2052.20   1
  -8   6  16 3219.73 1377.56   1
  -8   6  1728462.40 6584.06   1
  -8   6  1825380.40 6162.40   1
  -8   6  19 320.302 93.5488   1
  -8   6  2078214.00 5636.37   1
  -8   6  21 170.038 171.357   1
  -8   6  22 3158.44 1337.69   1
  -8   6  23 2680.96 1148.16   1
  -8   8   115979.60 3750.92   1
  -8   8   214690.10 3619.69   1
  -8   8   329724.50 6920.89   1
  -8   8   434738.10 7760.38   1
  -8   8   515037.40 6977.04   1
  -8   8   665282.00 6936.44   1
  -8   8   720334.50 6987.32   1
  -8   8   8 2389.37 1439.32   1
  -8   8   937955.80 5439.56   1
  -8   8  10 1432.57 337.154   1
  -8   8  11 1292.24  344.75   1
  -8   8  1216808.60 4184.20   1
  -8   8  13 272.667 224.692   1
  -8   8  1436577.90 6809.01   1
  -8   8  15 17.6706 71.5492   1
  -8   8  16 259.603  218.67   1
  -8   8  17 3294.30 1086.82   1
  -8   8  18 9884.51 3116.21   1
  -8   8  19 845.115 367.595   1
  -8   8  2023800.30 7045.80   1
  -8  10   110057.00 2792.44   1
  -8  10   218518.60 5095.70   1
  -8  10   3 7982.04 2069.18   1
  -8  10   4 8650.09 2655.57   1
  -8  10   530481.70 4802.98   1
  -8  10   617320.10 4313.27   1
  -8  10   711921.40 2760.57   1
  -8  10   8 9387.77 2124.91   1
  -8  10   912108.30 4339.82   1
  -8  10  1066301.70 3100.10   1
  -8  10  11 5080.99 2422.58   1
  -8  10  1233126.70 5848.60   1
  -8  10  13 1.93557 119.426   1
  -8  10  14 7101.87 1991.22   1
  -8  10  15 1689.47 581.238   1
  -8  10  16 9477.86 2962.12   1
  -8  10  17 4044.27 1342.34   1
  -8  12   1 5805.50 1693.09   1
  -8  12   212583.40 2864.97   1
  -8  12   3 4685.32 1104.74   1
  -8  12   4 7933.12 1928.06   1
  -8  12   5 4848.13 1068.29   1
  -8  12   614415.00 2754.03   1
  -8  12   714572.80 2746.29   1
  -8  12   836558.50 4561.05   1
  -8  12   9 9294.71 2269.02   1
  -8  12  10 8834.30 2603.16   1
  -7   1   1192178.0 7442.96   1
  -7   1   2246095.011410.20   1
  -7   1   3486665.058501.90   1
  -7   1   464984.8012379.00   1
  -7   1   5435326.015880.40   1
  -7   1   631196.20 6928.94   1
  -7   1   762978.0011189.30   1
  -7   1   811311.70 4320.08   1
  -7   1   920747.70 6200.23   1
  -7   1  10167002.014319.20   1
  -7   1  11 9846.72 3128.69   1
  -7   1  1258020.0011916.50   1
  -7   1  13220291.0 9294.73   1
  -7   1  14218308.017162.70   1
  -7   1  15207894.017214.30   1
  -7   1  1614144.00 3527.40   1
  -7   1  1760291.80 6815.38   1
  -7   1  1826125.00 6709.51   1
  -7   1  19 293.042 124.128   1
  -7   1  20 7056.81 2858.38   1
  -7   1  21 3377.67 1430.54   1
  -7   1  22 723.532 723.903   1
  -7   1  23 691.058 302.688   1
  -7   1  24 1807.05 1807.70   1
  -7   1  25 2904.97 2905.67   1
  -7   3   1416276.019578.70   1
  -7   3   225236.40 8696.34   1
  -7   3   387350.5011742.70   1
  -7   3   4 761.473 316.866   1
  -7   3   5 1045.02 537.763   1
  -7   3   631892.6031892.60   1
  -7   3   7329304.015710.60   1
  -7   3   8 4316.73 1188.28   1
  -7   3   940992.40 8611.38   1
  -7   3  10 7581.33 2020.56   1
  -7   3  11116953.0 5377.35   1
  -7   3  1227198.50 5816.90   1
  -7   3  13128498.015575.90   1
  -7   3  14 6143.85 1880.00   1
  -7   3  1534823.4010021.60   1
  -7   3  1635059.40 6935.46   1
  -7   3  1728187.80 5460.62   1
  -7   3  18 5943.87 1791.09   1
  -7   3  19 8817.05 3491.70   1
  -7   3  20 574.978 575.519   1
  -7   3  2136796.50 6851.28   1
  -7   3  22 2256.58 792.167   1
  -7   3  2313204.8013205.20   1
  -7   3  24 1937.19 1938.07   1
  -7   5   148240.50 7799.28   1
  -7   5   222804.40 5358.38   1
  -7   5   3220485.0 8732.59   1
  -7   5   411403.70 3221.50   1
  -7   5   571855.50 8828.56   1
  -7   5   630823.30 6273.31   1
  -7   5   711774.80 2903.68   1
  -7   5   899563.90 4767.62   1
  -7   5   919143.90 4269.89   1
  -7   5  10 6468.43 1643.71   1
  -7   5  1138088.40 6295.81   1
  -7   5  12 4428.22 1101.87   1
  -7   5  1316513.40 3492.21   1
  -7   5  1425014.20 6277.32   1
  -7   5  1561191.90 6337.25   1
  -7   5  16 662.776 322.737   1
  -7   5  1734259.70 6364.92   1
  -7   5  18 390.803 147.071   1
  -7   5  1942558.1042558.20   1
  -7   5  20 278.447 122.919   1
  -7   5  2122004.80 6828.81   1
  -7   5  2215865.60 5474.57   1
  -7   5  2318507.70 6076.92   1
  -7   7   120184.10 7318.08   1
  -7   7   255967.70 6903.70   1
  -7   7   326959.90 6245.51   1
  -7   7   4 5314.06 1645.93   1
  -7   7   5 2966.49 836.207   1
  -7   7   6 1944.00 529.349   1
  -7   7   744318.80 6990.52   1
  -7   7   816482.40 3157.84   1
  -7   7   9 3426.01 815.691   1
  -7   7  10 3050.24 926.102   1
  -7   7  1114614.90 3198.18   1
  -7   7  12 2270.27  524.56   1
  -7   7  1314101.20 3847.92   1
  -7   7  1428888.50 6511.58   1
  -7   7  1513590.1013590.20   1
  -7   7  16 3088.14 1110.64   1
  -7   7  1711637.80 3494.02   1
  -7   7  1830170.60 6565.91   1
  -7   7  19 6120.08 1933.49   1
  -7   7  20  166.27 181.254   1
  -7   7  2112268.80 4499.47   1
  -7   7  22 4478.72 4479.66   1
  -7   9   1114299.0 4454.69   1
  -7   9   220910.1013456.90   1
  -7   9   326401.00 4921.06   1
  -7   9   4 6238.82 1772.13   1
  -7   9   515736.00 3744.85   1
  -7   9   6 8168.22 2788.57   1
  -7   9   7 6721.98 1715.97   1
  -7   9   816353.00 3341.47   1
  -7   9   9 7162.87 1462.40   1
  -7   9  1021971.10 4783.31   1
  -7   9  1156463.70 5516.83   1
  -7   9  12 7626.90 2466.57   1
  -7   9  1350303.70 6655.99   1
  -7   9  14 610.002 211.813   1
  -7   9  15 3579.42 1112.73   1
  -7   9  16 1411.93 558.571   1
  -7   9  17 481.199 196.455   1
  -7   9  18 7534.68 2450.28   1
  -7   9  1926036.90 7341.63   1
  -7  11   115051.80 3461.71   1
  -7  11   2 5172.18 1175.45   1
  -7  11   3 1101.61  294.76   1
  -7  11   4 3165.83 791.058   1
  -7  11   5 8008.87 1764.48   1
  -7  11   633716.60 8978.13   1
  -7  11   788608.90 4264.27   1
  -7  11   829527.40 5821.42   1
  -7  11   973933.80 2909.21   1
  -7  11  10 3047.85 943.375   1
  -7  11  11 5038.52 1449.08   1
  -7  11  12 53.6582 91.9236   1
  -7  11  13 784.376 318.887   1
  -7  11  14 -0.9748 193.034   1
  -6   0   1 -73.508 53.5953   1
  -6   0   2282376.013234.40   1
  -6   0   3-205.605 322.584   1
  -6   0   4450327.065283.10   1
  -6   0   5-90.5838 171.893   1
  -6   0   6180675.0 7666.99   1
  -6   0   7 2210.78 3199.63   1
  -6   0   825007.4010680.80   1
  -6   0   9 43.9642 44.6651   1
  -6   0  1068987.8016092.40   1
  -6   0  11-253.315 485.895   1
  -6   0  12512616.0512616.0   1
  -6   0  13-139.572 193.544   1
  -6   0  1463675.7010307.70   1
  -6   0  15 91.4122 33.3829   1
  -6   0  1649861.00 8695.38   1
  -6   0  17 76.4718 119.974   1
  -6   0  18 3827.63 1649.65   1
  -6   0  19 33.4101 34.2638   1
  -6   0  2061989.8061989.90   1
  -6   0  21 276.726 276.999   1
  -6   0  2234637.1034637.20   1
  -6   0  24 121.312 122.865   1
  -6   2   1322534.011906.30   1
  -6   2   2149769.0 7489.31   1
  -6   2   385476.8011889.30   1
  -6   2   4358688.013184.40   1
  -6   2   5193827.0 6827.06   1
  -6   2   6 45.8683 57.5828   1
  -6   2   7110775.0 9069.58   1
  -6   2   895841.1012556.50   1
  -6   2   9176374.017036.30   1
  -6   2  10232259.0 9223.09   1
  -6   2  11 6105.94 1460.61   1
  -6   2  12155144.0 8245.23   1
  -6   2  1318748.00 4131.02   1
  -6   2  14185038.0 7894.23   1
  -6   2  15 579.732 184.141   1
  -6   2  1615500.70 4011.18   1
  -6   2  17 5895.42 1508.02   1
  -6   2  18 4512.17 1919.46   1
  -6   2  19 2133.33 709.979   1
  -6   2  20 512.451 226.422   1
  -6   2  21-90.9049 92.9439   1
  -6   2  22 709.527 314.978   1
  -6   2  23 1092.10 1092.31   1
  -6   2  2413195.8013195.90   1
  -6   2  25 849.288 849.993   1
  -6   4   1102748.0 9524.96   1
  -6   4   2600277.0154892.0   1
  -6   4   399455.5011220.50   1
  -6   4   485967.5012405.70   1
  -6   4   5220175.010222.60   1
  -6   4   634064.40 9022.38   1
  -6   4   7 4031.59 1292.59   1
  -6   4   8221692.0 9266.10   1
  -6   4   912146.50 2972.05   1
  -6   4  10160157.0 7652.33   1
  -6   4  11 2723.03 722.882   1
  -6   4  1239134.00 6470.84   1
  -6   4  13 1886.76  487.90   1
  -6   4  1455554.40 6570.48   1
  -6   4  15 114.618 152.998   1
  -6   4  1627840.90 6079.19   1
  -6   4  1749967.70 7663.35   1
  -6   4  18 9972.57 2766.78   1
  -6   4  1916861.30 4767.78   1
  -6   4  2017518.1017518.20   1
  -6   4  21 6362.48 2568.14   1
  -6   4  22 8403.64 3282.25   1
  -6   4  23 1355.21 1356.24   1
  -6   4  2426231.8026231.90   1
  -6   6   1 2390.24 904.181   1
  -6   6   213584.40 3268.36   1
  -6   6   340643.90 7826.12   1
  -6   6   417242.90 4896.78   1
  -6   6   5 6256.09 1854.03   1
  -6   6   6195138.010726.00   1
  -6   6   7 512.247 166.309   1
  -6   6   830003.30 5670.64   1
  -6   6   915056.90 3248.71   1
  -6   6  1028102.30 5300.94   1
  -6   6  11 391.912 193.025   1
  -6   6  12160385.0 7317.72   1
  -6   6  13 959.168 257.445   1
  -6   6  14 4554.81 1367.70   1
  -6   6  15 669.463 389.952   1
  -6   6  16 4144.12 1173.07   1
  -6   6  17 1493.26 650.305   1
  -6   6  18 7231.13 2292.46   1
  -6   6  19 4031.67 1342.10   1
  -6   6  2031035.30 8004.48   1
  -6   6  21 905.846  694.90   1
  -6   6  2217318.60 5812.22   1
  -6   8   1 880.138 911.017   1
  -6   8   2 2077.20 743.193   1
  -6   8   352143.60 7354.51   1
  -6   8   447688.6014219.30   1
  -6   8   6107844.0 6762.01   1
  -6   8   7 1955.73 2713.80   1
  -6   8   8 7419.21 2497.88   1
  -6   8   9 1742.15 512.267   1
  -6   8  10 7760.11 1695.48   1
  -6   8  11 1073.13 281.042   1
  -6   8  12 202.492 168.719   1
  -6   8  13 1830.14 1830.31   1
  -6   8  14-38.0989 24.7125   1
  -6   8  1528116.60 5525.24   1
  -6   8  1623147.60 7089.41   1
  -6   8  17 209.615 86.8115   1
  -6   8  1818842.90 5089.41   1
  -6   8  19 341.292 226.128   1
  -6   8  20 2786.03 1076.20   1
  -6  10   1 5759.10 3673.34   1
  -6  10   230195.40 6533.24   1
  -6  10   3 5775.21 2697.94   1
  -6  10   4 1433.82 393.135   1
  -6  10   5 372.287 86.8151   1
  -6  10   6 686.222 163.469   1
  -6  10   7 1886.26 702.304   1
  -6  10   848396.30 6048.66   1
  -6  10   9 259.199 333.214   1
  -6  10  1036646.90 5330.02   1
  -6  10  11 1837.43 730.276   1
  -6  10  1225484.70 5295.94   1
  -6  10  13 8100.55 2244.90   1
  -6  10  14 1375.79 503.707   1
  -6  10  15 2221.03 878.701   1
  -6  10  16 6204.81 2184.96   1
  -6  10  17 392.884 174.644   1
  -6  12   116669.60 5648.25   1
  -6  12   2 9400.48 2199.23   1
  -6  12   3 3537.99 837.449   1
  -6  12   4 8109.21 1817.68   1
  -6  12   5 9256.37 2388.27   1
  -6  12   630812.50 4500.21   1
  -6  12   7 9605.80 2129.28   1
  -6  12   823870.90 4342.79   1
  -6  12   9 270.902 83.6439   1
  -6  12  10 276.014 239.303   1
  -6  12  11 6286.79 2547.17   1
  -5   1   1525495.0145911.0   1
  -5   1   2120309.013864.00   1
  -5   1   4259310.0 8814.82   1
  -5   1   593910.5013409.00   1
  -5   1   6121268.010974.80   1
  -5   1   7365959.023257.10   1
  -5   1   880382.0012240.50   1
  -5   1   9402288.017716.20   1
  -5   1  1054853.2010651.30   1
  -5   1  11371257.015855.40   1
  -5   1  12 5452.58 1459.05   1
  -5   1  1380537.60 6624.97   1
  -5   1  1438505.00 6884.08   1
  -5   1  1588127.80 9918.11   1
  -5   1  1614721.60 3594.22   1
  -5   1  1710937.70 2791.32   1
  -5   1  1811490.10 3616.53   1
  -5   1  1933907.40 8920.97   1
  -5   1  2037705.1037705.20   1
  -5   1  2142724.7042724.80   1
  -5   1  2320000.1020000.20   1
  -5   1  24 361.161 361.828   1
  -5   3   1 94.1307 40.1593   1
  -5   3   2166206.0 6108.96   1
  -5   3   3141042.0 7276.67   1
  -5   3   4-11.0272 96.4718   1
  -5   3   5157031.0 5832.46   1
  -5   3   6454180.0454180.0   1
  -5   3   761454.0012313.20   1
  -5   3   8192507.0 7504.57   1
  -5   3   911920.90 3622.23   1
  -5   3  1013259.20 3068.92   1
  -5   3  11107998.0 4533.78   1
  -5   3  1219345.60 4533.92   1
  -5   3  13 219.773  66.641   1
  -5   3  14 86.4521  24.517   1
  -5   3  15 1635.20 400.729   1
  -5   3  16 5956.94 1814.57   1
  -5   3  1751343.00 7721.67   1
  -5   3  18 6272.29 1791.97   1
  -5   3  1917722.30 4941.26   1
  -5   3  20 904.029 395.911   1
  -5   3  2138643.8038643.90   1
  -5   3  22 -36.904  42.619   1
  -5   3  23 4213.04 4213.76   1
  -5   3  24 398.059 398.747   1
  -5   5   1213143.0 8996.93   1
  -5   5   2 902.268 369.465   1
  -5   5   395198.30 8823.50   1
  -5   5   418911.60 5261.79   1
  -5   5   529346.80 7608.58   1
  -5   5   642887.60 8588.90   1
  -5   5   727532.90 6819.63   1
  -5   5   8 5846.28 1639.11   1
  -5   5   9114804.0 6149.80   1
  -5   5  1034536.70 5999.27   1
  -5   5  11 4763.62 1132.18   1
  -5   5  1211467.10 3296.85   1
  -5   5  13 1909.49 534.098   1
  -5   5  1419090.50 4696.42   1
  -5   5  15 8835.96 2883.75   1
  -5   5  1683279.60 5425.75   1
  -5   5  1744302.80 7344.10   1
  -5   5  18 4654.65 4654.75   1
  -5   5  1924814.30 6009.31   1
  -5   5  2021203.70 5591.78   1
  -5   5  21 442.845 194.832   1
  -5   5  22 4311.52 1793.43   1
  -5   5  2317437.8017437.90   1
  -5   7   1 4127.75 1149.10   1
  -5   7   274439.40 7293.56   1
  -5   7   392789.6013263.80   1
  -5   7   4110325.012593.80   1
  -5   7   5177814.012704.20   1
  -5   7   6108885.013833.70   1
  -5   7   7151478.010148.80   1
  -5   7   8 2916.30 791.617   1
  -5   7   9 2643.96 651.658   1
  -5   7  10 5041.14 1510.39   1
  -5   7  11 5614.34 1502.11   1
  -5   7  1232752.60 6071.70   1
  -5   7  13 3359.53 860.606   1
  -5   7  14 9928.45 2762.27   1
  -5   7  15 -12.554 189.922   1
  -5   7  16 349.181 149.255   1
  -5   7  17 8235.06 2721.03   1
  -5   7  1812053.00 4454.43   1
  -5   7  19 7394.95 2401.48   1
  -5   7  20 2210.31 783.364   1
  -5   7  21 6829.37 2738.99   1
  -5   9   134820.20 6101.70   1
  -5   9   224927.30 8650.88   1
  -5   9   380093.1080093.10   1
  -5   9   437419.90 9468.17   1
  -5   9   538165.10 9466.82   1
  -5   9   616403.00 4256.13   1
  -5   9   731886.90 5892.89   1
  -5   9   822012.70 4692.50   1
  -5   9   9 4348.40 1211.07   1
  -5   9  10 8992.41 8992.45   1
  -5   9  1142596.5042596.60   1
  -5   9  12 872.262 304.858   1
  -5   9  1329813.20 5726.97   1
  -5   9  14 204.577 152.762   1
  -5   9  1520531.20 5414.96   1
  -5   9  16 5949.80 2114.95   1
  -5   9  17 1495.91 549.803   1
  -5   9  18 6888.39 2187.05   1
  -5  11   1 6235.94 1392.73   1
  -5  11   2 7149.60 1647.20   1
  -5  11   3 3429.84 1057.54   1
  -5  11   415275.50 3353.71   1
  -5  11   5 5573.19 1324.37   1
  -5  11   6 2531.75  766.00   1
  -5  11   712565.60 2716.33   1
  -5  11   8 8101.54 2050.91   1
  -5  11   915846.90 3428.37   1
  -5  11  10 4277.65 1011.42   1
  -5  11  11 4970.65 1462.97   1
  -5  11  12 1502.94 560.185   1
  -5  11  13  552.86 345.835   1
  -5  11  14 2682.40 945.883   1
  -5  13   1 6278.24 2544.50   1
  -5  13   2 567.357 442.581   1
  -5  13   3 505.214 291.107   1
  -5  13   4 1206.49 637.737   1
  -4   0   1 556.801 166.801   1
  -4   0   2326769.027314.60   1
  -4   0   3 431.379 194.726   1
  -4   0   4 5242.89 2052.80   1
  -4   0   5 381.501 258.782   1
  -4   0   7 10.9739 22.6867   1
  -4   0   857172.4015047.00   1
  -4   0   9 341.116 152.837   1
  -4   0  1023601.20 9673.14   1
  -4   0  11-40.7148 49.8752   1
  -4   0  1290779.00 8817.12   1
  -4   0  13  -52.59 36.8315   1
  -4   0  14335760.018534.80   1
  -4   0  15-81.2303 232.891   1
  -4   0  16251866.020406.30   1
  -4   0  17  25.312 43.8669   1
  -4   0  1838138.30 9483.70   1
  -4   0  19 156.385 156.989   1
  -4   0  21 606.908 607.828   1
  -4   0  2282745.7082745.80   1
  -4   2   1334699.011690.30   1
  -4   2   329560.80 7248.21   1
  -4   2   429119.70 7234.21   1
  -4   2   5 8609.72 2462.85   1
  -4   2   6401720.014688.00   1
  -4   2   7170659.0 6010.19   1
  -4   2   8 567.201 170.099   1
  -4   2   9149245.0 6358.12   1
  -4   2  10327946.013833.70   1
  -4   2  1134437.20 8278.18   1
  -4   2  12210409.010834.30   1
  -4   2  13 295.275 70.6474   1
  -4   2  14 952.147 237.219   1
  -4   2  15 8651.99 2041.12   1
  -4   2  16 4605.42 1305.17   1
  -4   2  1717568.60 4375.56   1
  -4   2  1848485.20 9393.35   1
  -4   2  19 5387.52 1866.62   1
  -4   2  2062595.4062595.50   1
  -4   2  22 7964.92 7965.02   1
  -4   2  23 3630.09 3630.69   1
  -4   2  24 3585.14 3586.26   1
  -4   4   1201999.0 9269.46   1
  -4   4   2177303.012066.80   1
  -4   4   3229336.0 9664.82   1
  -4   4   440241.6010140.50   1
  -4   4   5100335.015504.20   1
  -4   4   660140.1011390.20   1
  -4   4   7110326.0 7151.03   1
  -4   4   813335.20 3473.07   1
  -4   4   962066.40 9080.42   1
  -4   4  10  128.93 54.3868   1
  -4   4  11 3871.85 1025.62   1
  -4   4  1211972.70 2777.39   1
  -4   4  13 837.671 214.586   1
  -4   4  14 186.654 63.6472   1
  -4   4  15 2351.00 615.659   1
  -4   4  16 2186.04 784.887   1
  -4   4  17 1094.66 326.511   1
  -4   4  1824198.70 7509.50   1
  -4   4  19 4509.88 4509.94   1
  -4   4  20 1436.01 523.971   1
  -4   4  21 1327.14 575.829   1
  -4   4  22 555.772 556.408   1
  -4   4  23 315.075 315.275   1
  -4   6   124422.90 7536.80   1
  -4   6   2134884.0 8079.84   1
  -4   6   393305.90 6921.13   1
  -4   6   4185756.016966.80   1
  -4   6   5187045.019496.80   1
  -4   6   6186657.0 9826.27   1
  -4   6   745580.40 6895.91   1
  -4   6   855533.90 7225.93   1
  -4   6   920481.50 4832.15   1
  -4   6  1030943.60 6722.91   1
  -4   6  11 1581.66 413.672   1
  -4   6  12 -51.356 262.221   1
  -4   6  1327135.90 5632.67   1
  -4   6  1435821.90 5716.19   1
  -4   6  15 6259.08 2115.08   1
  -4   6  16 277.139 123.239   1
  -4   6  17 3873.09 1296.76   1
  -4   6  18 3019.34 1139.55   1
  -4   6  19 5740.79 1889.73   1
  -4   6  2010455.50 3952.81   1
  -4   6  21 8822.05 3422.75   1
  -4   6  2229183.20 7677.43   1
  -4   8   110271.80 3405.06   1
  -4   8   222618.10 5576.00   1
  -4   8   3 7506.95 7507.03   1
  -4   8   4154987.018287.30   1
  -4   8   515206.5015206.50   1
  -4   8   620014.50 4859.14   1
  -4   8   7 1359.46 541.855   1
  -4   8   8 909.898 304.703   1
  -4   8   9 6255.24 1495.81   1
  -4   8  10 4249.98 964.886   1
  -4   8  1111177.70 2757.34   1
  -4   8  1210120.80 2436.12   1
  -4   8  13 -80.919 86.3061   1
  -4   8  1421335.70 6851.88   1
  -4   8  15 336.085 213.546   1
  -4   8  1630344.50 6516.09   1
  -4   8  17 963.864 378.202   1
  -4   8  18 5237.94 1630.36   1
  -4   8  19 2908.76 988.633   1
  -4   8  20 154.686 483.891   1
  -4  10   113114.90 3294.72   1
  -4  10   234234.70 5927.50   1
  -4  10   325058.00 5233.36   1
  -4  10   4 7669.93 2311.63   1
  -4  10   512653.40 4025.92   1
  -4  10   631359.10 6975.06   1
  -4  10   717741.00 4384.50   1
  -4  10   811146.90 2688.65   1
  -4  10   9 4608.18 1986.56   1
  -4  10  1031982.80 5208.34   1
  -4  10  1111235.70 2556.07   1
  -4  10  1224623.80 5081.11   1
  -4  10  1310423.30 3198.88   1
  -4  10  14 1692.45 656.089   1
  -4  10  15 464.141 353.747   1
  -4  10  1625111.00 5681.77   1
  -4  12   1 1067.30 510.869   1
  -4  12   2 705.683 160.451   1
  -4  12   3 149.787 98.0414   1
  -4  12   4 682.448 169.961   1
  -4  12   5 3148.19 743.509   1
  -4  12   6 8406.43 2076.81   1
  -4  12   710788.10 2605.27   1
  -4  12   8 3268.55 795.554   1
  -4  12   9 3637.64 1056.48   1
  -4  12  10 3810.97 1143.10   1
  -4  12  11 212.349 217.381   1
  -3   1   1 8962.14 2074.89   1
  -3   1   2147772.013756.80   1
  -3   1   3177256.014259.30   1
  -3   1   447560.10 9958.03   1
  -3   1   5402356.031694.30   1
  -3   1   6 685.519 244.474   1
  -3   1   738456.50 8407.97   1
  -3   1   8272753.014503.20   1
  -3   1   953679.30 8950.79   1
  -3   1  1010064.00 2830.60   1
  -3   1  1164963.10 8665.26   1
  -3   1  1280128.70 7871.08   1
  -3   1  13 8910.25 2438.11   1
  -3   1  14 2321.05 689.438   1
  -3   1  1553121.50 7043.59   1
  -3   1  16 8747.42 2112.39   1
  -3   1  1723250.50 5428.62   1
  -3   1  1833854.20 7542.42   1
  -3   1  1954056.8054056.90   1
  -3   1  20 3191.80 1355.52   1
  -3   1  2133780.1033780.20   1
  -3   1  22 2399.88 2400.89   1
  -3   3   1325740.011911.50   1
  -3   3   237106.60 9055.88   1
  -3   3   3172503.0 6369.28   1
  -3   3   4111077.011026.00   1
  -3   3   562267.5011135.00   1
  -3   3   647711.90 9775.16   1
  -3   3   7 1960.09 659.746   1
  -3   3   862748.30 9575.40   1
  -3   3   910302.70 2655.40   1
  -3   3  1015449.20 4066.52   1
  -3   3  11 316.627 133.191   1
  -3   3  1210024.90 2533.96   1
  -3   3  13106230.0 5821.39   1
  -3   3  14 4954.42 1356.89   1
  -3   3  1528301.70 6245.73   1
  -3   3  1657962.50 6000.42   1
  -3   3  1732706.60 7222.65   1
  -3   3  1827232.90 6803.36   1
  -3   3  1984754.30 5712.84   1
  -3   3  20 2385.03 2386.02   1
  -3   3  21 1673.07 1673.86   1
  -3   3  22 3917.60 3917.84   1
  -3   3  23 3821.12 3821.24   1
  -3   5   186682.60 8607.28   1
  -3   5   2 92.0585 428.984   1
  -3   5   3184668.018153.20   1
  -3   5   457928.0010787.30   1
  -3   5   598868.40 7985.05   1
  -3   5   686338.80 9218.27   1
  -3   5   741497.10 7956.00   1
  -3   5   868130.40 8263.57   1
  -3   5   9282211.014645.30   1
  -3   5  1033680.10 6094.88   1
  -3   5  11274456.015803.50   1
  -3   5  12342357.016139.70   1
  -3   5  13162355.0 7975.42   1
  -3   5  1486283.80 7282.21   1
  -3   5  1555820.80 6101.92   1
  -3   5  1625514.10 6424.86   1
  -3   5  1736120.90 8881.32   1
  -3   5  18 3655.82 1541.92   1
  -3   5  1910355.20 3140.02   1
  -3   5  20 35.0906 36.0584   1
  -3   5  21 8733.49 3392.30   1
  -3   5  22 2751.63 2752.40   1
  -3   7   192158.50 4458.05   1
  -3   7   2 304.311 116.785   1
  -3   7   3 2314.10 697.798   1
  -3   7   439769.10 7325.13   1
  -3   7   556803.20 6552.11   1
  -3   7   634133.80 5780.80   1
  -3   7   7 4569.18 1161.74   1
  -3   7   814672.50 3394.64   1
  -3   7   932504.80 5859.01   1
  -3   7  1013205.10 4019.35   1
  -3   7  1139948.70 6689.75   1
  -3   7  1240399.30 7933.73   1
  -3   7  1310058.80 2407.25   1
  -3   7  14 1660.76 524.146   1
  -3   7  15 1285.02  492.92   1
  -3   7  16 4576.98 1563.48   1
  -3   7  17 3799.86 1592.95   1
  -3   7  18 8061.36 2581.79   1
  -3   7  19 3833.46 1221.07   1
  -3   7  20 688.369 261.726   1
  -3   7  21 7729.61 7729.71   1
  -3   9   1 4769.67 1202.53   1
  -3   9   210180.00 4132.75   1
  -3   9   320325.70 6001.91   1
  -3   9   4 8583.96 5496.39   1
  -3   9   555319.30 6460.37   1
  -3   9   657089.40 5659.45   1
  -3   9   721817.60 4207.37   1
  -3   9   859285.40 5292.33   1
  -3   9   9 2057.56 628.943   1
  -3   9  10 160.407  172.80   1
  -3   9  11 3610.57 1099.43   1
  -3   9  12 388.523 112.969   1
  -3   9  1368298.50 4232.14   1
  -3   9  14 181.402 112.582   1
  -3   9  1539263.00 6875.41   1
  -3   9  16 255.811 294.813   1
  -3   9  17 228.862 200.997   1
  -3   9  18 2718.20 991.268   1
  -3  11   141086.10 5457.89   1
  -3  11   213323.50 3346.50   1
  -3  11   325632.00 4848.16   1
  -3  11   4 8824.58 2098.62   1
  -3  11   5 1960.51 474.088   1
  -3  11   6 2466.82  652.33   1
  -3  11   7  400.67 132.903   1
  -3  11   8  917.99 1697.28   1
  -3  11   925246.80 5129.04   1
  -3  11  10 18.4639 139.897   1
  -3  11  1127698.80 5350.91   1
  -3  11  12 731.195 208.239   1
  -3  11  13 111.829 167.993   1
  -3  11  14 558.738 247.162   1
  -3  13   1 663.074 181.722   1
  -3  13   2 184.991 82.9573   1
  -3  13   3 825.226 220.305   1
  -3  13   4 7635.34 3345.54   1
  -3  13   535675.70 6536.26   1
  -2   0   1 5.44697 82.9554   1
  -2   0   3 527.904 209.284   1
  -2   0   5  5.5702 9.37637   1
  -2   0   6354854.017221.90   1
  -2   0   7-71.0134 120.595   1
  -2   0   8397142.021923.30   1
  -2   0   9 93.8528 199.055   1
  -2   0  1041148.7010293.40   1
  -2   0  11 30.1084 75.0516   1
  -2   0  12 7920.96 2934.23   1
  -2   0  13 183.714 87.7451   1
  -2   0  14186305.010284.50   1
  -2   0  15 233.037 233.303   1
  -2   0  16 6358.33 2689.18   1
  -2   0  17 184.277 321.751   1
  -2   0  1876347.40 4570.89   1
  -2   0  19 267.615 268.009   1
  -2   2   1310093.015806.90   1
  -2   2   2 276.708 142.291   1
  -2   2   377005.9012586.20   1
  -2   2   4110049.011967.10   1
  -2   2   568387.0012073.30   1
  -2   2   610386.30 2746.27   1
  -2   2   7 121.079 60.7785   1
  -2   2   880056.1010592.00   1
  -2   2   9191382.011986.80   1
  -2   2  10113378.0 5506.95   1
  -2   2  1132676.30 6786.92   1
  -2   2  1277412.30 8193.45   1
  -2   2  13 3650.80 1058.81   1
  -2   2  1452786.90 7058.45   1
  -2   2  1512725.50 3102.84   1
  -2   2  16 1496.54 402.634   1
  -2   2  1729729.30 5939.66   1
  -2   2  1834204.90 8903.88   1
  -2   2  19 89.5848 127.936   1
  -2   2  20 8353.05 8353.11   1
  -2   2  21 2245.92 2246.66   1
  -2   4   125011.90 6299.57   1
  -2   4   2246055.011226.00   1
  -2   4   3 1389.41 463.993   1
  -2   4   4895979.02922232.   1
  -2   4   5258531.012215.10   1
  -2   4   616766.20 4926.30   1
  -2   4   7238785.010209.50   1
  -2   4   8 2912.86 791.902   1
  -2   4   992495.70 6042.38   1
  -2   4  10452855.021441.10   1
  -2   4  1161343.70 8072.62   1
  -2   4  1287490.40 8890.14   1
  -2   4  1329399.70 5593.04   1
  -2   4  14 180.112 111.488   1
  -2   4  15 116.981 125.631   1
  -2   4  1637793.00 6529.85   1
  -2   4  17 2243.73 672.083   1
  -2   4  1858402.0058402.10   1
  -2   4  1915018.80 5325.76   1
  -2   4  2012501.50 4587.15   1
  -2   4  21 274.078 274.485   1
  -2   4  22 296.505 297.061   1
  -2   4  23 2809.30 2810.23   1
  -2   6   133943.10 7222.79   1
  -2   6   2 1895.71 527.795   1
  -2   6   327020.30 6573.92   1
  -2   6   437408.70 8921.49   1
  -2   6   512574.30 4292.99   1
  -2   6   6328391.012901.70   1
  -2   6   769028.70 7540.90   1
  -2   6   8459036.019179.50   1
  -2   6   9147351.010100.30   1
  -2   6  1044906.00 6161.71   1
  -2   6  11 127.158 132.579   1
  -2   6  1240981.50 7833.74   1
  -2   6  13133539.0 7371.71   1
  -2   6  1464934.90 8251.46   1
  -2   6  15 804.495 295.729   1
  -2   6  16 8932.81 3508.00   1
  -2   6  1713990.70 4031.10   1
  -2   6  18 1872.44  806.57   1
  -2   6  1919986.70 5210.00   1
  -2   6  2012185.80 3739.65   1
  -2   6  21  843.67 328.628   1
  -2   8   147216.70 8733.70   1
  -2   8   249712.8010972.90   1
  -2   8   311237.70 3489.28   1
  -2   8   416343.00 4432.18   1
  -2   8   518174.00 4704.67   1
  -2   8   6 1810.00 572.186   1
  -2   8   7-32.8539 115.396   1
  -2   8   8 409.625 108.229   1
  -2   8   924518.10 5659.70   1
  -2   8  1077353.70 4807.40   1
  -2   8  1114700.80 3245.73   1
  -2   8  1224284.20 7527.46   1
  -2   8  13 548.553 735.367   1
  -2   8  1425514.60 7556.57   1
  -2   8  1540038.40 6642.43   1
  -2   8  16 3172.15 1102.31   1
  -2   8  17 922.002 375.161   1
  -2   8  18 3937.65 1323.11   1
  -2   8  19 1864.04 682.682   1
  -2  10   113426.60 2874.69   1
  -2  10   220952.50 4026.57   1
  -2  10   329926.3012834.80   1
  -2  10   488231.60 4100.91   1
  -2  10   530166.70 8375.63   1
  -2  10   661543.60 7072.23   1
  -2  10   7 897.916 482.268   1
  -2  10   8 822.872 291.854   1
  -2  10   9 410.426 203.561   1
  -2  10  1046328.60 5794.81   1
  -2  10  11 5553.36 1545.46   1
  -2  10  12 681.287 238.001   1
  -2  10  13 1154.36 355.642   1
  -2  10  1421334.60 5390.89   1
  -2  10  15 2048.41 651.388   1
  -2  10  1633962.00 7951.00   1
  -2  12   1 3767.87 965.833   1
  -2  12   2 4804.91 1164.39   1
  -2  12   3 6111.90 1473.40   1
  -2  12   4 1393.68 446.017   1
  -2  12   5 530.349 134.452   1
  -2  12   6 1199.42 326.794   1
  -2  12   7 334.609 386.915   1
  -2  12   8 9264.69 2451.79   1
  -2  12   9 945.875 257.587   1
  -2  12  1010794.50 2870.57   1
  -1   1   2169026.014232.20   1
  -1   1   3242742.016193.80   1
  -1   1   437346.00 7604.08   1
  -1   1   5145139.010336.20   1
  -1   1   6152377.0 8092.61   1
  -1   1   710572.00 2729.19   1
  -1   1   8221286.011549.10   1
  -1   1   9234815.017555.80   1
  -1   1  10167902.011419.20   1
  -1   1  11 4006.66 1081.83   1
  -1   1  12 4183.34 1480.86   1
  -1   1  1328467.60 6849.70   1
  -1   1  14 8373.81 2007.76   1
  -1   1  15 1593.78  423.28   1
  -1   1  1667206.50 5399.73   1
  -1   1  17 7656.28 2238.30   1
  -1   1  18 236.501 78.2984   1
  -1   1  1910146.6010146.70   1
  -1   1  2014744.1014744.30   1
  -1   3   2 4621.84 1339.90   1
  -1   3   3123541.011098.10   1
  -1   3   4556735.0146047.0   1
  -1   3   5802807.01362347.   1
  -1   3   614548.30 3461.74   1
  -1   3   719183.60 5215.12   1
  -1   3   8 2343.97 753.653   1
  -1   3   912862.70 2957.62   1
  -1   3  1044933.00 7199.93   1
  -1   3  11  428.56 107.051   1
  -1   3  12 6643.97 1862.56   1
  -1   3  1341791.70 7797.77   1
  -1   3  14 68.6799 37.0033   1
  -1   3  15  147.36 86.8035   1
  -1   3  16 9764.71 2731.56   1
  -1   3  1746315.50 7673.07   1
  -1   3  18 2270.44 871.795   1
  -1   3  1925365.00 7528.04   1
  -1   3  20 344.563 151.865   1
  -1   3  21 311.443 311.902   1
  -1   3  22 671.843 672.561   1
  -1   5   121898.70 9158.93   1
  -1   5   2385932.048828.80   1
  -1   5   3390773.016467.90   1
  -1   5   457323.50 9678.83   1
  -1   5   527817.40 6223.68   1
  -1   5   6 108.187 128.511   1
  -1   5   7178846.0 9890.71   1
  -1   5   8410250.031492.70   1
  -1   5   9398439.016732.70   1
  -1   5  10 8771.32 2192.80   1
  -1   5  11246791.013623.50   1
  -1   5  1292243.40 9685.16   1
  -1   5  1351918.40 8042.91   1
  -1   5  14 5464.09 1636.06   1
  -1   5  1525253.90 7855.93   1
  -1   5  1629056.40 5780.03   1
  -1   5  1736924.60 7386.24   1
  -1   5  18 1542.88 523.397   1
  -1   5  19 5432.29 2221.57   1
  -1   5  20 626.714 210.414   1
  -1   5  2119351.90 6256.56   1
  -1   5  22 6700.07 6700.25   1
  -1   7   112920.40 2909.82   1
  -1   7   219360.00 4656.34   1
  -1   7   3 6726.03 1705.69   1
  -1   7   4 227.044 120.709   1
  -1   7   561107.40 7129.45   1
  -1   7   6 134.964  70.242   1
  -1   7   731077.00 6945.19   1
  -1   7   857655.90 5961.81   1
  -1   7   9106215.019429.50   1
  -1   7  1013396.00 4060.87   1
  -1   7  1113386.40 3160.35   1
  -1   7  12 8014.23 2071.04   1
  -1   7  13 7256.23 2005.57   1
  -1   7  1422114.60 5746.73   1
  -1   7  1546058.0046058.10   1
  -1   7  16 2938.30 963.095   1
  -1   7  17 5568.25 1698.64   1
  -1   7  18 118.891 98.6855   1
  -1   7  19 6617.23 2160.06   1
  -1   7  20 2969.61 1265.60   1
  -1   9   113126.00 5640.09   1
  -1   9   261543.70 6224.63   1
  -1   9   3 2919.51 1275.07   1
  -1   9   4 6677.87 2904.18   1
  -1   9   531647.60 5973.48   1
  -1   9   623088.50 4669.68   1
  -1   9   757503.80 5665.05   1
  -1   9   834748.90 5864.98   1
  -1   9   945296.40 9045.35   1
  -1   9  1052733.50 8301.80   1
  -1   9  11 5014.93 1468.08   1
  -1   9  1219542.70 4495.91   1
  -1   9  1311831.60 3049.49   1
  -1   9  14 3662.28 1116.34   1
  -1   9  15 3258.61 1246.02   1
  -1   9  16 988.809 346.657   1
  -1   9  1735505.10 6303.35   1
  -1  11   1 7270.51 1678.14   1
  -1  11   2 6437.12 1568.14   1
  -1  11   331483.40 4927.52   1
  -1  11   452386.50 4494.69   1
  -1  11   531880.80 4746.29   1
  -1  11   632222.50 4948.62   1
  -1  11   7 140.068 62.6278   1
  -1  11   8 56.6044 51.2584   1
  -1  11   9 6215.84 1776.43   1
  -1  11  10 6088.80 1769.91   1
  -1  11  1115394.40 3698.86   1
  -1  11  12 888.493 270.235   1
  -1  11  13 6858.55 2173.34   1
  -1  13   1 3271.15 808.402   1
  -1  13   2 2669.17  780.09   1
  -1  13   312317.30 2902.59   1
  -1  13   4 5875.50 1679.36   1
  -1  13   5 3628.69 1532.34   1
   0   0   3-13.1083 28.8927   1
   0   0   470881.6014548.70   1
   0   0   5 347.086  157.52   1
   0   0   6 259.166 94.5779   1
   0   0   7  28.433 40.5503   1
   0   0   8622352.0622352.0   1
   0   0   9-126.161 229.727   1
   0   0  10175758.0 9702.31   1
   0   0  11 28.2894 73.5357   1
   0   0  12112421.0 9938.82   1
   0   0  13 102.129 71.9713   1
   0   0  1428574.40 7312.15   1
   0   0  15 92.3335 71.2613   1
   0   0  1648436.00 9874.62   1
   0   0  17 138.936 236.408   1
   0   0  1821884.80 7061.61   1
   0   2   0241695.017315.30   1
   0   2   1 5314.58 1536.39   1
   0   2   284619.7013380.60   1
   0   2   3561124.0277510.0   1
   0   2   5 262.278 125.133   1
   0   2   6140216.0 6963.65   1
   0   2   7118371.0 7159.07   1
   0   2   8 3135.61 1011.71   1
   0   2   922320.00 5440.38   1
   0   2  10 2397.79 748.107   1
   0   2  11 1915.59 505.944   1
   0   2  1256785.20 6876.43   1
   0   2  1346392.50 7042.75   1
   0   2  14 8289.63 2455.66   1
   0   2  15 2190.06 697.011   1
   0   2  16 314.215 150.668   1
   0   2  1711267.30 3102.31   1
   0   2  1823084.8023084.80   1
   0   2  19 1642.56 711.327   1
   0   2  20 9930.73 3796.65   1
   0   4   055796.5013932.10   1
   0   4   179753.8010563.80   1
   0   4   2139173.0 6558.87   1
   0   4   3307655.012072.90   1
   0   4   4 4182.12 1558.34   1
   0   4   5  705.57 280.521   1
   0   4   653034.30 8729.33   1
   0   4   7 689.728 228.592   1
   0   4   840465.9012646.80   1
   0   4   914239.80 3789.51   1
   0   4  1043918.10 7595.28   1
   0   4  11 1101.50 294.946   1
   0   4  12 2524.17 735.976   1
   0   4  13 4077.85 1076.81   1
   0   4  14 7754.53 2282.80   1
   0   4  15 860.143 1074.32   1
   0   4  1618074.10 4969.91   1
   0   4  17 4211.30 1458.81   1
   0   4  1819328.90 5386.79   1
   0   4  20 2783.52 2783.74   1
   0   4  2121146.8021146.90   1
   0   4  22 890.564 891.109   1
   0   6   0166130.0166130.0   1
   0   6   157960.0010908.10   1
   0   6   2 2478.60 752.967   1
   0   6   3103007.0 5677.83   1
   0   6   4 6538.71 1846.22   1
   0   6   5 5225.41 1477.24   1
   0   6   654906.20 7909.13   1
   0   6   7 42.3927 54.1694   1
   0   6   843432.00 7434.08   1
   0   6   928301.50 5841.76   1
   0   6  1010488.60 3375.53   1
   0   6  11 100.968 107.456   1
   0   6  1256446.3011980.20   1
   0   6  1341707.00 6525.17   1
   0   6  1417554.60 4348.79   1
   0   6  1527284.00 5492.71   1
   0   6  1648843.3048843.40   1
   0   6  17 741.666 275.355   1
   0   6  1818971.80 4980.86   1
   0   6  19 97.2388 160.573   1
   0   6  2033374.40 6883.62   1
   0   8   0 5364.18 2340.50   1
   0   8   111902.10 3286.85   1
   0   8   228982.10 7857.73   1
   0   8   333628.30 6496.84   1
   0   8   432126.10 7796.41   1
   0   8   5 7177.98 2570.14   1
   0   8   640571.70 7734.36   1
   0   8   7 236.169 145.623   1
   0   8   864105.80 5038.54   1
   0   8   914626.10 3175.83   1
   0   8  1021916.60 5903.19   1
   0   8  11 1910.76 800.338   1
   0   8  1220957.30 6819.09   1
   0   8  13 3279.31 1154.29   1
   0   8  1417167.80 3989.79   1
   0   8  15 3298.08 1047.40   1
   0   8  1626663.00 6068.71   1
   0   8  17 374.967 127.813   1
   0   8  18 6721.47 2186.20   1
   0  10   011558.90 3515.60   1
   0  10   137324.30 6416.13   1
   0  10   247876.20 6929.90   1
   0  10   383880.70 9464.94   1
   0  10   4157076.0 8570.99   1
   0  10   510124.0010124.10   1
   0  10   618947.30 5310.74   1
   0  10   7   94.76 87.2394   1
   0  10   826077.60 5342.80   1
   0  10   9 258.098 84.8847   1
   0  10  10 7809.67 2115.03   1
   0  10  11 75.9475 168.353   1
   0  10  12 2282.20 691.908   1
   0  10  13 437.489 137.943   1
   0  10  1411095.40 2932.35   1
   0  10  15 4832.18 1597.84   1
   0  12   0 3875.88 1338.30   1
   0  12   1 1032.17 252.629   1
   0  12   2 3858.73 924.772   1
   0  12   3 1792.66 509.186   1
   0  12   4 7155.49 1704.48   1
   0  12   5 4322.38 1287.81   1
   0  12   6 4195.72 1259.26   1
   0  12   7 3215.17 858.756   1
   0  12   8 7178.75 1987.63   1
   0  12   9 2592.81 719.443   1
   0  12  10 1042.39 457.889   1
   1   1   0 8308.17 2650.59   1
   1   1   228129.4011321.30   1
   1   1   3 6779.07 2044.65   1
   1   1   537690.80 7410.83   1
   1   1   6176066.0 7294.84   1
   1   1   7406041.019107.00   1
   1   1   8 2416.69 728.407   1
   1   1   9163509.0 7212.92   1
   1   1  10 8482.01 2621.74   1
   1   1  1140511.60 7732.77   1
   1   1  1258872.00 7875.02   1
   1   1  1313116.70 3638.43   1
   1   1  1429680.40 5768.10   1
   1   1  15 1623.23 454.339   1
   1   1  16 2522.40  722.93   1
   1   1  1777753.10 4292.18   1
   1   1  18 9998.26 9998.31   1
   1   1  19 7855.79 3110.29   1
   1   1  20 1371.44 1372.01   1
   1   3   085343.5013315.00   1
   1   3   1 2496.95 844.783   1
   1   3   241418.00 9228.83   1
   1   3   361281.2010158.20   1
   1   3   4 7569.98 1760.88   1
   1   3   5 288.617 156.191   1
   1   3   634446.6012898.10   1
   1   3   7 7516.79 2505.36   1
   1   3   8191579.0 8194.12   1
   1   3   945602.60 8156.39   1
   1   3  1023250.30 5522.20   1
   1   3  11186889.0 8631.49   1
   1   3  12 4084.66 1131.44   1
   1   3  1321915.60 4872.54   1
   1   3  1424824.50 5708.95   1
   1   3  1511148.60 3110.79   1
   1   3  16 10.4546 94.4512   1
   1   3  17-13.6859 44.7407   1
   1   3  18 199.777 88.4621   1
   1   3  1920536.30 6584.06   1
   1   3  20  247.27 247.976   1
   1   5   0 1110.00 475.751   1
   1   5   1 8348.29 2950.40   1
   1   5   2 507.645 147.775   1
   1   5   3 7317.95 1882.14   1
   1   5   428646.50 6196.69   1
   1   5   523626.90 5036.56   1
   1   5   6 25.9132 78.5269   1
   1   5   775552.30 7000.98   1
   1   5   817713.20 3974.13   1
   1   5   935198.70 6565.96   1
   1   5  10 2171.63 676.642   1
   1   5  11 65.0552  155.88   1
   1   5  12 3943.59 1211.18   1
   1   5  13 8828.70 3569.12   1
   1   5  14 2230.12 668.045   1
   1   5  1521329.80 4952.47   1
   1   5  1635418.00 7063.16   1
   1   5  1720959.70 6715.50   1
   1   5  18 1339.57  468.10   1
   1   5  19 339.461  573.56   1
   1   5  20 96.8908  112.11   1
   1   5  2126483.2026483.30   1
   1   7   0 1251.50 494.967   1
   1   7   1122977.0 7576.03   1
   1   7   2103923.017210.90   1
   1   7   3120636.014815.70   1
   1   7   411071.10 3167.63   1
   1   7   5 776.222 188.249   1
   1   7   6 508.545 181.701   1
   1   7   7 578.751 153.346   1
   1   7   838408.2010138.80   1
   1   7   917554.3017554.40   1
   1   7  10 257.664 80.8982   1
   1   7  11 5353.37 1415.18   1
   1   7  12 3456.50 1199.22   1
   1   7  1344030.70 6776.37   1
   1   7  14 4726.17 1963.65   1
   1   7  1518711.90 4181.20   1
   1   7  16 8635.03 2321.72   1
   1   7  1731872.50 6647.69   1
   1   7  18 1262.84 425.608   1
   1   7  1914251.20 3961.71   1
   1   9   0 1499.55 537.676   1
   1   9   1 3212.10  894.62   1
   1   9   2 543.125 324.064   1
   1   9   329369.70 5929.43   1
   1   9   453785.60 6722.81   1
   1   9   527632.00 4710.14   1
   1   9   6 9516.41 2170.43   1
   1   9   742914.50 6917.70   1
   1   9   812200.1012200.20   1
   1   9   9 1427.29 600.611   1
   1   9  1034533.30 5812.98   1
   1   9  11 686.919 223.368   1
   1   9  12 7284.08 2037.75   1
   1   9  13 8949.72 2519.01   1
   1   9  14 1927.95 572.875   1
   1   9  1523211.70 5705.98   1
   1   9  16 4972.73 1670.59   1
   1  11   0 7482.51 1642.50   1
   1  11   122402.20 4490.93   1
   1  11   224595.50 5532.65   1
   1  11   385645.70 3119.70   1
   1  11   423596.60 6343.10   1
   1  11   534405.80 5882.99   1
   1  11   6 9261.47 3485.02   1
   1  11   7  563.25 223.027   1
   1  11   8 2248.46 636.428   1
   1  11   911346.50 2910.37   1
   1  11  1010341.40 2747.06   1
   1  11  11 8251.72 2350.24   1
   1  11  12 794.058 363.708   1
   1  13   0 4477.21 1909.59   1
   1  13   121419.60 3879.20   1
   1  13   2 7703.94 2269.39   1
   1  13   321851.90 4748.34   1
   1  13   411526.60 4360.42   1
   2   0   1 347.252 115.332   1
   2   0   251374.9013695.70   1
   2   0   3-102.631 111.724   1
   2   0   414062.40 4325.13   1
   2   0   5 3.56617 36.6463   1
   2   0   6126188.011926.00   1
   2   0   7 654.065 370.824   1
   2   0   8188783.010421.30   1
   2   0   9 -57.851  178.34   1
   2   0  10204741.0 9677.30   1
   2   0  11 575.219 352.581   1
   2   0  12128908.021073.70   1
   2   0  13 125.904 233.138   1
   2   0  14 1553.68 698.382   1
   2   0  15-21.7445 202.755   1
   2   0  16 4748.10 2002.84   1
   2   0  17 106.589 107.241   1
   2   0  18 4561.03 4561.33   1
   2   0  19 112.041 112.255   1
   2   0  2038053.4038053.50   1
   2   2   0325801.016194.80   1
   2   2   126719.80 6478.41   1
   2   2   240818.10 8544.20   1
   2   2   317688.90 8653.37   1
   2   2   436207.60 8308.71   1
   2   2   577931.5010774.40   1
   2   2   6615268.0316071.0   1
   2   2   7 9554.93 2927.09   1
   2   2   8355430.019620.70   1
   2   2   9-17.2361 179.693   1
   2   2  10 2267.88  791.24   1
   2   2  11 161.072 76.9041   1
   2   2  12 7519.02 2334.11   1
   2   2  13 7969.72 2075.15   1
   2   2  1418200.90 5399.20   1
   2   2  1548191.00 6875.12   1
   2   2  16254279.039224.00   1
   2   2  17  351.04 155.576   1
   2   2  1856981.90 7278.30   1
   2   2  19 3226.64 1363.21   1
   2   2  20 4298.80 4299.47   1
   2   4   061055.9011676.20   1
   2   4   112407.90 3642.89   1
   2   4   211005.40 3735.76   1
   2   4   4160631.010969.60   1
   2   4   542455.50 7748.54   1
   2   4   7 6177.65 2112.61   1
   2   4   863198.10 8488.14   1
   2   4   9 411.568 107.523   1
   2   4  1026834.40 5617.66   1
   2   4  11 131.801  161.51   1
   2   4  12156515.011999.80   1
   2   4  1326262.90 5775.79   1
   2   4  14101490.014261.10   1
   2   4  1539757.60 7640.47   1
   2   4  1613564.00 4974.56   1
   2   4  17 8435.34 3315.69   1
   2   4  18 9489.40 3653.52   1
   2   4  1921374.10 6689.15   1
   2   4  2021167.3021167.40   1
   2   4  21 4977.35 4977.67   1
   2   6   0131522.0 7260.36   1
   2   6   157643.6013807.60   1
   2   6   293185.2014224.10   1
   2   6   397569.6010220.20   1
   2   6   4 2691.40 746.025   1
   2   6   5 1144.89 323.135   1
   2   6   6 3619.20 962.809   1
   2   6   724298.70 4805.27   1
   2   6   839777.80 7187.96   1
   2   6   923771.60 5617.10   1
   2   6  1022708.70 7672.58   1
   2   6  11 4513.04 4513.66   1
   2   6  12 418.558 357.931   1
   2   6  1352279.00 7200.61   1
   2   6  1432837.40 6220.69   1
   2   6  15 2849.81 1214.30   1
   2   6  1616237.80 3958.61   1
   2   6  17 216.265 137.104   1
   2   6  1817420.00 4651.20   1
   2   6  19 2130.81 917.537   1
   2   8   0 3314.37 2032.40   1
   2   8   1 5822.35 1254.77   1
   2   8   2 763.204 230.884   1
   2   8   312757.90 3529.56   1
   2   8   4 5339.46 1392.83   1
   2   8   535723.60 7260.89   1
   2   8   6 8813.72 2509.29   1
   2   8   7 3709.46 1141.83   1
   2   8   8 4862.64 1634.40   1
   2   8   9  257.41 228.878   1
   2   8  10 4306.51 1488.83   1
   2   8  1141100.8041100.90   1
   2   8  1213857.50 3351.35   1
   2   8  13 7211.67 1949.43   1
   2   8  14 1394.63 437.788   1
   2   8  15 137.139 183.614   1
   2   8  1615044.00 3719.70   1
   2   8  17 1431.10 534.495   1
   2  10   044526.80 7551.31   1
   2  10   121652.40 5009.52   1
   2  10   256233.00 5314.39   1
   2  10   330367.40 6835.82   1
   2  10   419836.60 6594.10   1
   2  10   5 6093.08 2489.79   1
   2  10   6 1596.41 603.613   1
   2  10   7 216.518 77.4633   1
   2  10   8 9061.15 2481.82   1
   2  10   9 2579.24  897.95   1
   2  10  10 2964.48 896.596   1
   2  10  11 668.234 307.539   1
   2  10  1228425.90 5401.26   1
   2  10  13 1236.67 343.281   1
   2  10  1421233.80 5513.87   1
   2  12   015482.50 3213.25   1
   2  12   115322.20 3550.79   1
   2  12   253838.20 5039.90   1
   2  12   319539.30 4593.81   1
   2  12   418893.80 4427.26   1
   2  12   5 3444.32 3190.74   1
   2  12   6 9773.94 2636.43   1
   2  12   7 1717.01 682.654   1
   2  12   8 5634.77 1704.00   1
   3   1   0439759.0136165.0   1
   3   1   1 404.088 164.184   1
   3   1   297818.9014439.50   1
   3   1   3727203.01418088.   1
   3   1   4146863.0 7772.62   1
   3   1   5355254.016522.50   1
   3   1   6 2841.45 744.521   1
   3   1   7195229.010549.90   1
   3   1   8 4713.86 1190.79   1
   3   1   9 232.001 73.3998   1
   3   1  1048828.70 7967.69   1
   3   1  1155521.00 6884.72   1
   3   1  12 1702.40 548.627   1
   3   1  13 5364.57 1606.76   1
   3   1  14 4936.27 1518.56   1
   3   1  1570752.90 6461.22   1
   3   1  16 1716.59 749.213   1
   3   1  1781823.50 4516.88   1
   3   1  18 -6.4225 218.413   1
   3   1  19 1590.09  687.55   1
   3   1  20 8036.80 3156.10   1
   3   1  21 59.0689 63.6355   1
   3   3   0159253.0 7572.23   1
   3   3   112599.00 3440.67   1
   3   3   2370175.012799.70   1
   3   3   3126722.0 7455.13   1
   3   3   4277865.031552.30   1
   3   3   5129652.012255.00   1
   3   3   624854.00 6344.55   1
   3   3   7374977.014584.70   1
   3   3   818242.50 4348.22   1
   3   3   914045.80 3720.26   1
   3   3  1074266.80 6576.73   1
   3   3  1110889.50 3656.57   1
   3   3  12 962.006 314.226   1
   3   3  13153899.0 8704.80   1
   3   3  1414522.70 4479.63   1
   3   3  1567674.90 6503.94   1
   3   3  16 291.375 91.3823   1
   3   3  17 8079.94 2563.99   1
   3   3  18 332.813 122.016   1
   3   3  1932361.80 8058.87   1
   3   3  20 451.968 452.533   1
   3   5   011828.80 3525.46   1
   3   5   1198398.0 7279.07   1
   3   5   2 57.4552 136.531   1
   3   5   387667.00 8009.12   1
   3   5   4 1098.50 312.814   1
   3   5   580616.70 7235.79   1
   3   5   6 9883.86 2367.56   1
   3   5   726559.30 6562.21   1
   3   5   810725.50 2760.80   1
   3   5   9 3635.47 1133.55   1
   3   5  1010358.30 2821.38   1
   3   5  11 4088.78 1469.03   1
   3   5  12  126.15 193.472   1
   3   5  13 2883.95 1246.11   1
   3   5  14 2746.95 855.115   1
   3   5  1513381.10 4054.40   1
   3   5  16 889.787 367.789   1
   3   5  17 5070.90 1437.00   1
   3   5  18 5066.58 1705.84   1
   3   5  19 9827.03 9827.13   1
   3   7   0 1365.29 1384.85   1
   3   7   153526.30 7945.31   1
   3   7   267055.50 8014.62   1
   3   7   3  289.96 223.025   1
   3   7   413343.10 3673.16   1
   3   7   5 1469.64 443.477   1
   3   7   625783.20 4604.51   1
   3   7   7 6561.71 6561.77   1
   3   7   8-8.60343 345.298   1
   3   7   977874.50 4295.47   1
   3   7  1010050.60 3345.12   1
   3   7  1150536.30 6305.81   1
   3   7  1216150.30 5693.33   1
   3   7  13 5211.56 1412.80   1
   3   7  14 213.667 93.0441   1
   3   7  1516195.90 3924.90   1
   3   7  16 2325.03 690.851   1
   3   7  1712127.50 3171.76   1
   3   7  18 670.882  600.82   1
   3   9   0 4992.13 1413.69   1
   3   9   117858.30 4101.29   1
   3   9   2 5353.72 2315.98   1
   3   9   347772.40 6096.28   1
   3   9   420462.60 4831.75   1
   3   9   5 1490.68 1572.54   1
   3   9   655329.90 6718.24   1
   3   9   722614.2022614.30   1
   3   9   8 8094.57 2096.47   1
   3   9   9  435.63 143.952   1
   3   9  1026509.90 5238.54   1
   3   9  1116853.60 3756.48   1
   3   9  12 1650.31 488.912   1
   3   9  1316266.60 3841.91   1
   3   9  14 1658.70 502.744   1
   3   9  1512523.00 3279.31   1
   3  11   011879.40 2610.91   1
   3  11   123262.50 4095.23   1
   3  11   2 7190.06 2229.48   1
   3  11   312871.60 3356.97   1
   3  11   414829.90 3856.64   1
   3  11   5 7617.49 2132.53   1
   3  11   6 407.875 228.501   1
   3  11   747914.20 5499.92   1
   3  11   8 1241.75 360.344   1
   3  11   943428.20 5638.49   1
   3  11  10 1236.64 362.424   1
   3  11  1115616.60 4353.05   1
   3  13   0 456.939 188.276   1
   3  13   1 2147.58 554.485   1
   3  13   2 1596.14 694.774   1
   4   0   0376739.044935.30   1
   4   0   1 438.185 234.534   1
   4   0   3-73.9245 91.4258   1
   4   0   436557.4010684.70   1
   4   0   5 1007.12 526.682   1
   4   0   6 522.162 268.098   1
   4   0   7 169.378 64.5708   1
   4   0   810865.20 3893.98   1
   4   0   9 755.474 394.387   1
   4   0  10228236.013012.60   1
   4   0  11 40.5106 67.4248   1
   4   0  12211466.017459.20   1
   4   0  13 129.712 130.726   1
   4   0  1617827.7017827.80   1
   4   0  17-14.5344  18.799   1
   4   0  18 557.942 558.632   1
   4   0  19 511.562 512.196   1
   4   0  20 145.403 146.627   1
   4   2   0141660.010641.70   1
   4   2   180158.1011440.50   1
   4   2   248525.30 9755.14   1
   4   2   3163292.0 8244.91   1
   4   2   4121806.0 8676.77   1
   4   2   716673.40 4185.44   1
   4   2   8 107.347 142.908   1
   4   2   9 1596.84 519.426   1
   4   2  10 393.685 118.377   1
   4   2  11181710.012639.30   1
   4   2  12 559.258 320.132   1
   4   2  1313199.60 3615.55   1
   4   2  1445326.80 7781.12   1
   4   2  1561937.80 7512.31   1
   4   2  16167153.014217.50   1
   4   2  17 4289.25 1788.90   1
   4   2  18 6134.13 2483.03   1
   4   2  1919618.40 6334.00   1
   4   2  20 484.539 517.505   1
   4   4   0172899.012438.80   1
   4   4   1202843.032541.80   1
   4   4   234262.40 8312.20   1
   4   4   3 969.518  347.00   1
   4   4   4202115.0 7470.81   1
   4   4   560389.40 7254.52   1
   4   4   614754.70 3179.84   1
   4   4   717132.80 4156.90   1
   4   4   8 6857.48 2127.68   1
   4   4   922698.50 5721.51   1
   4   4  1050326.20 7736.75   1
   4   4  1184201.70 3769.35   1
   4   4  1289637.70 4185.29   1
   4   4  13 3942.61 1204.87   1
   4   4  1415894.50 4612.26   1
   4   4  1576121.00 4202.09   1
   4   4  16 9881.68 2649.12   1
   4   4  17 873.877 381.684   1
   4   4  18 2772.36 1178.55   1
   4   4  1913321.50 4798.56   1
   4   6   0106032.011010.60   1
   4   6   129904.1010343.70   1
   4   6   2124618.0 7647.45   1
   4   6   3 4535.49 1297.45   1
   4   6   4 633.747 179.288   1
   4   6   5 4228.24 1058.65   1
   4   6   6164944.014813.70   1
   4   6   741178.60 7069.26   1
   4   6   847393.00 7126.64   1
   4   6   9 7576.17 3139.50   1
   4   6  10 331.205 283.184   1
   4   6  1129577.70 6824.99   1
   4   6  1219590.10 4732.90   1
   4   6  1314913.60 4386.45   1
   4   6  1452748.40 6538.76   1
   4   6  15 3107.05 944.657   1
   4   6  16 3124.10 935.207   1
   4   6  17 7876.54 2197.57   1
   4   6  18 826.889 868.889   1
   4   8   025587.40 5902.76   1
   4   8   1 4182.93 1788.42   1
   4   8   2116794.017419.70   1
   4   8   319814.40 6988.36   1
   4   8   4 6060.77 1859.92   1
   4   8   5-88.0207 110.805   1
   4   8   6 8801.12 2230.17   1
   4   8   7 193.284  212.83   1
   4   8   866508.70 5032.29   1
   4   8   9 1225.43 1225.81   1
   4   8  10103074.011607.80   1
   4   8  11 450.145 240.911   1
   4   8  12 1364.57 389.217   1
   4   8  13 475.315 154.491   1
   4   8  14 720.851 306.054   1
   4   8  15 1245.16 432.002   1
   4   8  1616641.10 4624.89   1
   4  10   012680.80 3613.99   1
   4  10   121335.10 5873.27   1
   4  10   2 4320.55 4738.25   1
   4  10   3 2983.76 1481.56   1
   4  10   4 9656.49 2655.69   1
   4  10   5 9329.03 2501.24   1
   4  10   665128.90 5888.19   1
   4  10   7 403.605  212.57   1
   4  10   812509.60 3082.68   1
   4  10   9 804.389 643.178   1
   4  10  10 3808.43 1143.83   1
   4  10  11 320.772 166.196   1
   4  10  12 935.739 281.774   1
   4  10  13 536.347 318.585   1
   4  12   0 6612.85 1679.88   1
   4  12   1 9243.07 2677.28   1
   4  12   222684.20 4816.73   1
   4  12   3 4917.78 2460.71   1
   4  12   4 566.866 217.246   1
   4  12   5 522.676 309.651   1
   4  12   610618.50 2766.81   1
   4  12   7 932.959 275.943   1
   5   1   1385282.016163.80   1
   5   1   2-27.9743 56.7999   1
   5   1   3437918.026938.90   1
   5   1   4108942.0 9521.24   1
   5   1   525658.60 5550.76   1
   5   1   7 7149.42 1793.19   1
   5   1   8 1600.03 439.846   1
   5   1   9226948.011163.30   1
   5   1  10 553.733 184.918   1
   5   1  11146206.0 6814.03   1
   5   1  12 4222.68 1313.75   1
   5   1  1319549.70 6800.78   1
   5   1  1410184.00 3174.44   1
   5   1  1544796.60 9055.27   1
   5   1  16 1865.29 806.528   1
   5   1  17 1233.32 566.932   1
   5   1  18 1374.10 595.824   1
   5   1  19  67.808 70.5066   1
   5   1  20 8217.60 3224.06   1
   5   3   060092.2010570.10   1
   5   3   190095.7011829.70   1
   5   3   2 966.002 337.361   1
   5   3   395959.5014465.50   1
   5   3   4 8865.11 2516.09   1
   5   3   5286542.044050.20   1
   5   3   6 5574.75 1570.45   1
   5   3   7328313.013812.10   1
   5   3   817950.50 4920.72   1
   5   3   9 7081.03 2137.26   1
   5   3  10 6114.98 1860.44   1
   5   3  11 7025.60 2034.68   1
   5   3  1212573.00 3960.92   1
   5   3  1358116.40 6842.31   1
   5   3  1412694.70 3857.61   1
   5   3  15 3.68495 121.325   1
   5   3  16 343.921 151.735   1
   5   3  17 4242.69 1765.68   1
   5   3  18 1718.13 741.879   1
   5   3  19 8839.88 3430.09   1
   5   5   022170.90 5147.00   1
   5   5   157099.00 8616.70   1
   5   5   2 6095.85 1624.89   1
   5   5   319374.20 4599.06   1
   5   5   413532.80 3633.03   1
   5   5   5 229.781 87.7027   1
   5   5   6 1478.84 414.324   1
   5   5   711186.50 3306.60   1
   5   5   8 9039.22 2520.23   1
   5   5   9 8660.76 2864.77   1
   5   5  10 813.105 263.865   1
   5   5  11 3566.55 1192.95   1
   5   5  12 9590.67 3773.57   1
   5   5  13  309.05 130.903   1
   5   5  14 542.227 179.784   1
   5   5  1512851.60 3275.76   1
   5   5  16 1598.90 526.406   1
   5   5  17 538.442  215.74   1
   5   5  18 5588.14 5588.29   1
   5   7   0115386.0 7328.79   1
   5   7   141685.20 7937.77   1
   5   7   242818.60 6966.77   1
   5   7   3216390.024398.30   1
   5   7   4193346.028755.70   1
   5   7   516837.60 5492.41   1
   5   7   718718.10 5397.32   1
   5   7   844377.00 8653.62   1
   5   7   986716.00 8159.67   1
   5   7  10-94.7973  283.50   1
   5   7  1163407.7012986.50   1
   5   7  12 140.864 87.3161   1
   5   7  1314163.80 3376.37   1
   5   7  14 166.653 110.387   1
   5   7  1520886.40 4576.10   1
   5   7  16 811.826 260.405   1
   5   9   038154.6010718.10   1
   5   9   1142529.010131.70   1
   5   9   2 776.771 714.017   1
   5   9   3 339.005  151.45   1
   5   9   426873.70 8026.24   1
   5   9   6 341.061 342.177   1
   5   9   776101.10 3556.72   1
   5   9   8 2341.33 699.368   1
   5   9   9 1444.10  455.24   1
   5   9  10 2234.38  648.92   1
   5   9  11 343.134 114.416   1
   5   9  12 2851.45 881.161   1
   5   9  13 4541.03 1272.06   1
   5   9  14 2960.93 1262.22   1
   5  11   0 4113.97  948.33   1
   5  11   114358.50 3216.31   1
   5  11   2 6841.42 1937.39   1
   5  11   312452.60 3247.02   1
   5  11   4 9599.33 2586.62   1
   5  11   513345.60 3304.55   1
   5  11   6 2924.80  985.48   1
   5  11   7 9794.50 2653.01   1
   5  11   817696.40 4366.51   1
   5  11   9 191.286 220.735   1
   5  11  10 434.161 434.729   1
   6   0   063563.8016682.50   1
   6   0   1 54.4356 61.5411   1
   6   0   2278768.013186.30   1
   6   0   3 1277.53 664.097   1
   6   0   4182676.010084.20   1
   6   0   5  125.27 278.472   1
   6   0   6356545.016532.80   1
   6   0   7 10.7401 97.8395   1
   6   0   883415.40 7933.10   1
   6   0   9 36.9292 108.008   1
   6   0  10  307.37 155.624   1
   6   0  11 22.2523  55.036   1
   6   0  12 498.744 499.414   1
   6   0  13 220.048 220.357   1
   6   0  1427958.0027958.20   1
   6   0  15-42.2649 47.8803   1
   6   0  16 2277.85 2278.16   1
   6   0  18 1285.83 1286.33   1
   6   0  19-2.56045 18.0361   1
   6   2   0115863.0 9111.62   1
   6   2   1552560.0115171.0   1
   6   2   2428149.020124.70   1
   6   2   360237.0011791.10   1
   6   2   482806.8010527.50   1
   6   2   514625.90 4469.85   1
   6   2   6 112.844 103.863   1
   6   2   7176982.0 7454.63   1
   6   2   8 3810.44 1289.18   1
   6   2   9 1701.34 906.733   1
   6   2  10215707.024522.80   1
   6   2  11  296.12 101.404   1
   6   2  12 4006.83 1724.01   1
   6   2  13 9626.86 2668.98   1
   6   2  1412882.60 3971.02   1
   6   2  1513331.60 4882.37   1
   6   2  16 1322.29 574.342   1
   6   2  1713223.60 4787.00   1
   6   2  1824406.20 7172.57   1
   6   2  19 332.522 147.247   1
   6   4   017288.30 4364.97   1
   6   4   1 2287.46 639.814   1
   6   4   2 805.068 393.955   1
   6   4   3187846.0 9913.33   1
   6   4   457733.90 9071.31   1
   6   4   533269.70 7415.54   1
   6   4   7282777.029771.50   1
   6   4   867170.60 7211.50   1
   6   4   9 4312.68 1532.10   1
   6   4  10 7817.82 2641.06   1
   6   4  1125220.50 6308.46   1
   6   4  12 1185.99 407.872   1
   6   4  13 8145.56 2616.74   1
   6   4  1416808.50 4706.24   1
   6   4  15 6232.38 2524.03   1
   6   4  16 2229.16 955.009   1
   6   4  17 716.234 314.063   1
   6   4  18 3635.09 1530.41   1
   6   6   0180095.0 7143.69   1
   6   6   125959.50 7230.29   1
   6   6   275572.60 7394.74   1
   6   6   3 698.086  200.99   1
   6   6   453631.60 6750.49   1
   6   6   5 8246.16 2175.43   1
   6   6   665782.90 6666.69   1
   6   6   720784.60 7216.82   1
   6   6   8 4735.16 4735.76   1
   6   6   913088.10 3311.05   1
   6   6  10 3019.37 908.796   1
   6   6  11 4446.77 1461.86   1
   6   6  1225491.40 5380.43   1
   6   6  13 7710.79 2457.54   1
   6   6  1412307.40 3183.23   1
   6   6  15 980.992 281.905   1
   6   6  16 4815.85 1385.40   1
   6   6  17 4686.40 1945.35   1
   6   8   017768.30 6452.28   1
   6   8   1102742.010424.30   1
   6   8   296413.6013385.50   1
   6   8   328125.7011899.00   1
   6   8   4 5269.92 1493.65   1
   6   8   5 6373.58 1859.86   1
   6   8   612207.10 2917.39   1
   6   8   7 572.178 197.168   1
   6   8   810649.0010649.10   1
   6   8   9 676.092  450.39   1
   6   8  1028764.10 5403.38   1
   6   8  11 2586.12  780.34   1
   6   8  12 4478.59 1349.32   1
   6   8  13 5911.02 1615.12   1
   6   8  1415698.80 3731.64   1
   6   8  15 1928.22 835.526   1
   6  10   0-25.4592 22.2797   1
   6  10   1 2553.48 759.668   1
   6  10   2 728.963 456.094   1
   6  10   3 7646.34 1952.30   1
   6  10   410971.30 2854.83   1
   6  10   5 5431.03 1539.58   1
   6  10   622572.20 4679.93   1
   6  10   7 346.448 169.939   1
   6  10   8 9063.34 2366.45   1
   6  10   9 8818.45 2469.70   1
   6  10  10 427.791 191.203   1
   6  10  11 160.214 156.553   1
   6  12   068578.40 2882.00   1
   6  12   116422.50 6943.00   1
   6  12   211166.50 2963.91   1
   6  12   3 4349.68 1123.36   1
   6  12   4 298.551 204.945   1
   6  12   5 887.985 255.581   1
   7   1   041095.60 8800.74   1
   7   1   198851.60 9890.35   1
   7   1   238466.4010108.20   1
   7   1   3108685.0 6835.01   1
   7   1   469855.30 8286.21   1
   7   1   519193.70 4071.40   1
   7   1   6 4357.94 1057.86   1
   7   1   7 9477.31 2561.03   1
   7   1   8 302.225 120.113   1
   7   1   916846.50 4465.49   1
   7   1  10 1173.68 470.781   1
   7   1  11 3034.92 1329.22   1
   7   1  12 1968.99 865.001   1
   7   1  1349043.60 9085.70   1
   7   1  14 169.882 75.5419   1
   7   1  15 9582.20 3702.18   1
   7   1  16 371.706 163.697   1
   7   1  17 6727.18 2696.10   1
   7   1  18 2386.80 1022.57   1
   7   3   017473.30 5409.35   1
   7   3   142518.10 8346.51   1
   7   3   280622.50 9538.77   1
   7   3   3 1300.19 1000.52   1
   7   3   475719.40 8695.64   1
   7   3   5244055.013084.90   1
   7   3   627841.20 6065.48   1
   7   3   7182300.017031.30   1
   7   3   8 2841.40 980.128   1
   7   3   9105845.014908.70   1
   7   3  10 4016.07 1739.87   1
   7   3  1112854.00 3864.02   1
   7   3  12 2304.42 849.969   1
   7   3  1310213.40 2741.24   1
   7   3  14 6846.58 2758.90   1
   7   3  1546473.60 8248.75   1
   7   3  16 6389.06 2574.46   1
   7   3  1744353.60 7910.35   1
   7   3  18 2344.76 1007.20   1
   7   5   0127157.0 4966.75   1
   7   5   157538.40 7896.26   1
   7   5   2 5193.67 1410.80   1
   7   5   376590.60 6156.42   1
   7   5   462742.80 7633.97   1
   7   5   5111603.0 6818.12   1
   7   5   6124029.010562.50   1
   7   5   7 2822.79 1104.71   1
   7   5   817478.60 5003.99   1
   7   5   9 232.755 155.407   1
   7   5  1045890.50 9415.56   1
   7   5  1113240.40 4005.10   1
   7   5  1222510.80 4858.40   1
   7   5  1339687.10 6057.79   1
   7   5  14 228.448 83.9116   1
   7   5  1527271.10 7597.06   1
   7   5  16 8933.83 8933.96   1
   7   5  17 2144.68 2145.08   1
   7   7   0 90.8774 66.2053   1
   7   7   179152.00 6680.03   1
   7   7   2 1690.06 523.869   1
   7   7   4 9355.38 3787.33   1
   7   7   5 1484.95 508.678   1
   7   7   6 2463.76 2295.76   1
   7   7   7 2930.75 958.339   1
   7   7   8 3599.33 1342.14   1
   7   7   910918.20 3495.82   1
   7   7  10  811.09 811.448   1
   7   7  11 6539.48 1819.02   1
   7   7  12 9257.70 2496.56   1
   7   7  1317040.70 4160.69   1
   7   7  14 2044.17 614.733   1
   7   7  15 305.732 137.863   1
   7   9   0 3143.75 1389.33   1
   7   9   1 7237.34 1751.90   1
   7   9   2 659.794 603.751   1
   7   9   416902.2016902.30   1
   7   9   520140.40 4506.46   1
   7   9   6 3160.94 865.424   1
   7   9   710682.00 2788.44   1
   7   9   8 95.1229 152.009   1
   7   9   9 6170.00 1765.73   1
   7   9  1014507.00 3687.20   1
   7   9  11 3386.37 991.705   1
   7   9  12  748.57 229.622   1
   7  11   012512.70 3250.04   1
   7  11   112359.70 3158.06   1
   7  11   213784.40 3466.66   1
   7  11   3 8986.56 2544.69   1
   7  11   4 2618.61  739.41   1
   7  11   511281.80 2861.52   1
   7  11   6 993.668 347.071   1
   7  11   7 1892.89 584.617   1
   7  11   8 268.747  104.20   1
   8   0   0251962.011890.30   1
   8   0   1 1119.41 1119.56   1
   8   0   2 916.079 379.596   1
   8   0   3 60.7621 324.481   1
   8   0   4368744.016929.20   1
   8   0   5-74.5642  128.73   1
   8   0   657310.2010308.80   1
   8   0   7 38.3774 99.8547   1
   8   0   815697.70 5009.59   1
   8   0   9  98.331  58.219   1
   8   0  11 49.1586 51.1832   1
   8   0  1244786.4044786.40   1
   8   0  13-49.9004  55.273   1
   8   0  15 163.773 165.038   1
   8   0  1628526.3028526.40   1
   8   0  17 326.899  327.75   1
   8   0  1816139.5016139.60   1
   8   2   0238755.021966.70   1
   8   2   1 45.6345  112.89   1
   8   2   2  11.661 12.0505   1
   8   2   3124811.0 9900.03   1
   8   2   426359.40 6636.54   1
   8   2   571671.10 8786.28   1
   8   2   6 168.727  60.688   1
   8   2   7 101.018  34.397   1
   8   2   889624.1013297.10   1
   8   2   911596.60 3210.02   1
   8   2  10157090.0 8671.79   1
   8   2  11 6916.05 2041.64   1
   8   2  1294726.3022577.80   1
   8   2  1461112.30 9065.70   1
   8   2  15 1461.30 632.981   1
   8   2  1626498.40 7495.25   1
   8   2  17 165.584 88.3395   1
   8   2  18 3709.04 3709.27   1
   8   4   0 1209.81 363.588   1
   8   4   1118539.0 4361.14   1
   8   4   218068.50 4039.70   1
   8   4   3 1418.16 500.776   1
   8   4   415499.10 3836.03   1
   8   4   5 2483.64 729.251   1
   8   4   653490.80 7501.91   1
   8   4   719826.70 4986.03   1
   8   4   815577.50 5816.45   1
   8   4   9 251.307 80.7769   1
   8   4  1017834.30 4410.31   1
   8   4  11 1800.74 544.476   1
   8   4  1214239.4014239.50   1
   8   4  13 3062.94 1106.09   1
   8   4  1418349.40 6107.62   1
   8   4  15 2239.12 959.152   1
   8   4  16 6952.95 2778.36   1
   8   4  17 4283.41 1788.50   1
   8   6   0161985.020757.20   1
   8   6   1 38.2761 57.4454   1
   8   6   217345.30 4272.01   1
   8   6   319604.70 4347.48   1
   8   6   443731.50 7720.25   1
   8   6   5 47.4952 51.2434   1
   8   6   6 2860.33 1250.55   1
   8   6   717292.60 6011.07   1
   8   6   8 3501.37 1066.90   1
   8   6   946861.40 7448.67   1
   8   6  10 9610.45 3087.01   1
   8   6  11 1875.06 601.256   1
   8   6  12 8620.91 2704.90   1
   8   6  1311688.70 3073.07   1
   8   6  14 3397.29 1036.43   1
   8   6  15 1287.91 453.047   1
   8   8   027789.70 6813.82   1
   8   8   116706.80 3666.40   1
   8   8   2 8108.76 1795.23   1
   8   8   3 8379.64 2324.59   1
   8   8   454288.30 5780.46   1
   8   8   5 171.483 172.444   1
   8   8   614732.1014732.20   1
   8   8   7 885.615 289.983   1
   8   8   811556.30 2956.17   1
   8   8   914243.60 3484.74   1
   8   8  1016363.30 4076.00   1
   8   8  11 1235.22 369.157   1
   8   8  1217077.50 4032.32   1
   8   8  13 98.0595 68.3142   1
   8  10   036777.70 6925.66   1
   8  10   1 7275.06 4647.79   1
   8  10   2 6557.27 1822.22   1
   8  10   3 4562.42 1292.25   1
   8  10   4 2735.13 813.205   1
   8  10   5 5346.32 1535.67   1
   8  10   6 4245.55 1252.14   1
   8  10   7 5173.45 1437.63   1
   8  10   812612.00 3076.02   1
   8  10   9 164.747 182.909   1
   8  12   014774.80 3618.58   1
   8  12   1 3209.13 1442.20   1
   8  12   2 712.159 241.976   1
   8  12   3 4876.63 2019.68   1
   9   1   0 1636.56 593.728   1
   9   1   1 489.646 166.774   1
   9   1   289305.20 7993.07   1
   9   1   3149908.0 6251.46   1
   9   1   443088.50 6787.99   1
   9   1   569218.20 6807.48   1
   9   1   6 7305.92 1769.18   1
   9   1   732835.80 6140.18   1
   9   1   8 1903.89 690.656   1
   9   1   922221.0022221.10   1
   9   1  10 272.471  225.12   1
   9   1  1180397.20 4438.14   1
   9   1  12 700.813 701.586   1
   9   1  1337017.40 8686.80   1
   9   1  14 9622.40 3703.02   1
   9   1  15 1924.19 827.922   1
   9   1  16 1004.90 438.796   1
   9   1  17 6594.80 2653.84   1
   9   3   0181056.0 7035.12   1
   9   3   1254931.0 9035.30   1
   9   3   213414.50 3221.96   1
   9   3   3155546.0 7726.73   1
   9   3   4 4464.60 1375.16   1
   9   3   5 348.089 113.784   1
   9   3   6 7052.49 2159.17   1
   9   3   790614.40 8789.09   1
   9   3   813756.60 4144.10   1
   9   3   927501.10 6354.19   1
   9   3  10 2726.43 764.846   1
   9   3  11 3371.86 1032.31   1
   9   3  1247631.4047631.50   1
   9   3  1326421.70 7641.51   1
   9   3  14 5603.33 2285.92   1
   9   3  1514725.80 5185.79   1
   9   3  16 3504.71 1476.99   1
   9   5   0 3167.26 852.091   1
   9   5   125129.80 5530.47   1
   9   5   211769.70 2988.04   1
   9   5   314265.40 3529.26   1
   9   5   4 7846.30 2099.20   1
   9   5   579102.3021309.20   1
   9   5   6-40.5061 385.692   1
   9   5   7 2315.65 882.537   1
   9   5   8 307.506 334.707   1
   9   5   9101119.025403.20   1
   9   5  10 4049.75 1275.35   1
   9   5  1111730.00 3053.64   1
   9   5  1210414.20 2754.77   1
   9   5  13 6135.71 1716.83   1
   9   5  14 338.215 339.085   1
   9   5  15 286.276 126.951   1
   9   7   032421.60 9396.19   1
   9   7   120018.00 6993.86   1
   9   7   2 9286.25 2307.87   1
   9   7   347639.00 6499.11   1
   9   7   4 2666.78  833.62   1
   9   7   5170259.015146.50   1
   9   7   6 3010.47 1058.10   1
   9   7   722642.70 7161.87   1
   9   7   810116.70 3886.23   1
   9   7   9 2705.15 813.454   1
   9   7  10 4309.06 1262.59   1
   9   7  1124563.40 5274.01   1
   9   7  12 2188.64  681.23   1
   9   7  13 4915.81 1476.48   1
   9   9   028541.6028541.70   1
   9   9   2 5422.49 3117.24   1
   9   9   3 2044.08 610.186   1
   9   9   4 2618.87 755.516   1
   9   9   5 286.178 96.9968   1
   9   9   6-111.639 74.9998   1
   9   9   725212.10 4839.29   1
   9   9   8 2164.66 663.015   1
   9   9   935769.00 5630.66   1
   9   9  1015242.50 3810.83   1
   9   9  1117984.20 5962.25   1
   9  11   0 7546.37 1993.39   1
   9  11   1 6700.46 1938.63   1
   9  11   2 3496.50 1066.08   1
   9  11   3 1981.16 609.674   1
   9  11   4 623.751 287.526   1
   9  11   5 6878.13 1876.60   1
   9  11   6 287.469 127.869   1
  10   0   0122704.0 6773.56   1
  10   0   1-421.215  884.24   1
  10   0   2573698.036643.30   1
  10   0   3-9.34809 130.915   1
  10   0   414890.70 4787.42   1
  10   0   5-45.5378 33.3819   1
  10   0   617949.10 5661.95   1
  10   0   7 12.0905 211.123   1
  10   0   8 5635.96 5636.02   1
  10   0   9-134.993  136.29   1
  10   0  10 9076.31 9076.42   1
  10   0  1247483.7047483.90   1
  10   0  13 321.446 322.162   1
  10   0  14 4497.40 4497.64   1
  10   0  15 43.2773 49.4652   1
  10   0  16 2835.16 2836.05   1
  10   2   0264231.011009.40   1
  10   2   1103969.0 4810.28   1
  10   2   2218817.010069.80   1
  10   2   383369.30 7791.06   1
  10   2   4105473.0 6619.32   1
  10   2   5 7.69627 13.8491   1
  10   2   6 423.506 113.469   1
  10   2   717981.30 6538.58   1
  10   2   879068.20 7320.13   1
  10   2   9 5166.99 1527.04   1
  10   2  1038287.60 7492.97   1
  10   2  1232330.30 8374.21   1
  10   2  1311546.20 4309.83   1
  10   2  14 7892.85 3108.42   1
  10   2  15 287.848 275.935   1
  10   2  16 2444.68 1048.50   1
  10   4   073935.10 7328.57   1
  10   4   116347.00 4015.66   1
  10   4   215567.30 3786.73   1
  10   4   3 7628.93 2063.76   1
  10   4   429391.20 5773.27   1
  10   4   5 7558.51 3165.55   1
  10   4   6 7507.68 2559.36   1
  10   4   7 5590.86 1680.52   1
  10   4   824845.60 5434.03   1
  10   4   9 4019.03 1700.91   1
  10   4  10 363.241 388.789   1
  10   4  11 271.655 111.758   1
  10   4  12 2465.32 868.459   1
  10   4  13 576.919 253.279   1
  10   4  14 2185.31 937.893   1
  10   4  15 527.899 408.668   1
  10   6   032273.10 5940.08   1
  10   6   1 9722.32 2413.33   1
  10   6   246569.8010297.10   1
  10   6   3  233.62 146.565   1
  10   6   428992.60 6950.61   1
  10   6   519924.00 5336.65   1
  10   6   622122.60 5037.55   1
  10   6   7 3872.73 1638.21   1
  10   6   8 9960.67 2640.48   1
  10   6   927393.80 5397.73   1
  10   6  1015714.40 4255.41   1
  10   6  1125302.50 5168.99   1
  10   6  1235088.30 5778.37   1
  10   6  13 874.036 531.631   1
  10   8   014874.80 3463.29   1
  10   8   1 1804.62 582.763   1
  10   8   2 8845.10 8845.25   1
  10   8   4120462.014991.20   1
  10   8   522141.20 5231.78   1
  10   8   666072.20 5581.55   1
  10   8   7 2232.60 724.672   1
  10   8   833468.60 5468.60   1
  10   8   923624.80 4720.54   1
  10   8  1019413.60 4523.99   1
  10   8  11 170.426 138.736   1
  10  10   028937.10 6166.65   1
  10  10   1 6433.79 3072.37   1
  10  10   2 8647.45 2390.58   1
  10  10   3 202.305 143.005   1
  10  10   4 2111.59  650.61   1
  10  10   5 2001.11 532.584   1
  10  10   6 1078.55 316.163   1
  10  10   7 224.464 94.1767   1
  10  12   0 70.1535  73.096   1
  11   1   0 4340.05 1234.51   1
  11   1   1  239.27 73.5152   1
  11   1   2 2457.57 700.715   1
  11   1   3 8238.34 2183.45   1
  11   1   4 7214.21 2081.95   1
  11   1   5 5961.16 1806.93   1
  11   1   6 8531.57 3527.98   1
  11   1   7 1278.68 545.455   1
  11   1   8 4332.15 1598.58   1
  11   1   9 2521.88 1093.22   1
  11   1  1111623.2011623.60   1
  11   1  12 1130.30 492.328   1
  11   1  13 607.868 266.635   1
  11   1  14 2498.05 1066.48   1
  11   1  15 8269.31 3238.24   1
  11   3   0288329.011115.90   1
  11   3   1818597.0584151.0   1
  11   3   299473.50 8833.70   1
  11   3   317325.90 4038.76   1
  11   3   414955.70 3762.21   1
  11   3   5 9816.33 3985.74   1
  11   3   6 21.0546  66.979   1
  11   3   724661.80 5666.03   1
  11   3   8 9639.54 2779.64   1
  11   3   9 1188.65  521.44   1
  11   3  10 1171.55 379.495   1
  11   3  1114270.00 5118.46   1
  11   3  12 3726.33 1562.85   1
  11   3  1325357.00 7341.91   1
  11   3  14 793.735 348.118   1
  11   3  15 1708.63 741.609   1
  11   5   029938.80 7470.31   1
  11   5   1 638.073 213.633   1
  11   5   2 792.425 269.656   1
  11   5   351483.7051483.70   1
  11   5   4 3741.81 1239.15   1
  11   5   514208.00 3505.74   1
  11   5   6 8454.65 2572.42   1
  11   5   752499.7052499.80   1
  11   5   8 7322.67 2281.83   1
  11   5   939569.50 6150.40   1
  11   5  1016680.00 3899.92   1
  11   5  1117082.30 4768.99   1
  11   5  12  509.02 217.924   1
  11   5  13 6013.75 2439.65   1
  11   7   020788.80 4967.67   1
  11   7   1 1045.38 623.784   1
  11   7   227821.90 5563.04   1
  11   7   391876.20 4243.18   1
  11   7   478424.9078425.00   1
  11   7   562682.5062682.60   1
  11   7   611053.60 3456.87   1
  11   7   7 3373.64 957.201   1
  11   7   8 298.786 235.795   1
  11   7   9 1544.04 449.213   1
  11   7  10 444.621 220.628   1
  11   7  1122332.50 4769.11   1
  11   7  12 147.276 65.9019   1
  11   9   0  546.62 156.945   1
  11   9   1 9464.32 2569.22   1
  11   9   2 1790.70 606.839   1
  11   9   3 5641.91 1570.39   1
  11   9   4 2063.48 607.454   1
  11   9   521527.60 4597.29   1
  11   9   6 145.925 143.657   1
  11   9   718754.30 4089.43   1
  11   9   8 1118.59 353.719   1
  11   9   9 9916.14 9916.25   1
  11  11   0 247.975 78.8077   1
  11  11   1 379.928 134.564   1
  11  11   2 4667.80 1349.88   1
  11  11   3 3418.01 1219.96   1
  12   0   0 8386.62 3027.13   1
  12   0   1 8.88443 104.655   1
  12   0   2 6752.58 2228.95   1
  12   0   3 95.2011 40.9685   1
  12   0   4 6011.67 2227.98   1
  12   0   5-82.9011 84.9001   1
  12   0   6 9821.21 3939.71   1
  12   0   7  164.34  200.84   1
  12   0   878896.0078896.00   1
  12   0  10 3429.06 3429.26   1
  12   0  11 661.477  662.24   1
  12   0  1212584.2012584.40   1
  12   0  13 237.992 239.235   1
  12   0  14 729.089 729.399   1
  12   2   0116674.0 4279.18   1
  12   2   119300.80 4179.32   1
  12   2   2 1710.30 484.112   1
  12   2   3 3970.96 1248.49   1
  12   2   4 9154.32 2827.61   1
  12   2   5 5038.40 1515.15   1
  12   2   627539.80 6069.27   1
  12   2   7 6545.63 1915.97   1
  12   2   8168724.0168724.0   1
  12   2   9 2614.49 2614.59   1
  12   2  1044863.10 8603.82   1
  12   2  1124183.30 7263.94   1
  12   2  12 1824.48  786.17   1
  12   2  13 533.263 234.529   1
  12   2  14 5644.10 2304.09   1
  12   4   0 7654.61 1967.61   1
  12   4   111531.70 3338.34   1
  12   4   285815.10 9279.91   1
  12   4   3 724.509 327.599   1
  12   4   414179.80 3846.01   1
  12   4   5 5383.00 1705.66   1
  12   4   611291.90 3545.28   1
  12   4   7 7045.80 2856.36   1
  12   4   848304.70 6156.39   1
  12   4   923478.70 5927.38   1
  12   4  1028388.30 6418.79   1
  12   4  11 867.784 379.131   1
  12   4  1215796.00 5456.15   1
  12   4  13 665.194  554.07   1
  12   6   0 292.259 263.303   1
  12   6   1 2461.71 1261.46   1
  12   6   2 2061.08 1109.71   1
  12   6   3 808.189  365.37   1
  12   6   4 8777.66 2671.21   1
  12   6   5 3828.52 1302.00   1
  12   6   619718.70 5527.13   1
  12   6   7 953.032 310.425   1
  12   6   8 5557.07 1930.52   1
  12   6   9 2539.72 742.718   1
  12   6  1016623.20 4106.97   1
  12   6  11 644.168 337.555   1
  12   6  1251865.9051866.00   1
  12   8   0 38.6953 58.3103   1
  12   8   1 4356.49 1547.63   1
  12   8   230612.50 5831.56   1
  12   8   3 8007.45 2219.45   1
  12   8   420529.80 4305.83   1
  12   8   513984.80 3459.20   1
  12   8   6 3204.93 1003.91   1
  12   8   722840.70 4835.88   1
  12   8   8 9286.57 2534.53   1
  12   8   9-124.494 126.499   1
  12  10   0 3528.39 1069.95   1
  12  10   1 5421.47 1672.46   1
  12  10   226566.10 5068.68   1
  12  10   3 351.042  172.91   1
  12  10   4 4922.56 1463.20   1
  12  10   5 1875.73 703.105   1
  13   1   0135001.0 5135.85   1
  13   1   143878.80 6590.29   1
  13   1   216262.80 4199.09   1
  13   1   383367.50 7628.72   1
  13   1   4 21.5658 88.8618   1
  13   1   5135086.0 7894.81   1
  13   1   6 28.1647 97.5214   1
  13   1   792241.30 8075.15   1
  13   1   8-60.0239  62.532   1
  13   1   924079.30 7349.22   1
  13   1  10 5350.64 2195.21   1
  13   1  11 2426.29 1036.42   1
  13   1  12 1338.98 581.515   1
  13   1  13 121.742 449.897   1
  13   3   040997.90 6588.60   1
  13   3   159197.50 7456.78   1
  13   3   2 7236.39 1826.18   1
  13   3   310009.70 2742.69   1
  13   3   4 6437.75 1948.56   1
  13   3   551586.20 6646.79   1
  13   3   6 142.756 56.9721   1
  13   3   756766.5056766.60   1
  13   3   811752.20 4408.67   1
  13   3   915908.90 4476.99   1
  13   3  10 2931.05 1243.29   1
  13   3  1123487.90 7057.16   1
  13   3  12 2094.40 900.499   1
  13   3  13 4373.63 1823.14   1
  13   5   0 9459.88 2534.70   1
  13   5   1 636.077 337.865   1
  13   5   2 4343.21 1873.88   1
  13   5   373034.10 8399.25   1
  13   5   4-14.5713 68.7073   1
  13   5   5 1417.97 619.106   1
  13   5   643845.90 6209.11   1
  13   5   710417.60 2783.99   1
  13   5   814920.10 4322.10   1
  13   5   924002.70 5088.38   1
  13   5  1014840.60 4373.81   1
  13   5  1139705.70 8044.97   1
  13   7   016572.70 5838.84   1
  13   7   1 3957.28 1669.33   1
  13   7   2 3249.38 3250.43   1
  13   7   3 6992.73 2185.91   1
  13   7   4 1898.79 618.716   1
  13   7   5 2218.82 705.779   1
  13   7   6 173.585 170.126   1
  13   7   725049.90 5191.66   1
  13   7   8 860.364 311.532   1
  13   7   912118.90 3155.14   1
  13   7  10 559.213 559.601   1
  13   9   0 1453.33  941.31   1
  13   9   114836.10 3543.70   1
  13   9   2 196.322 145.147   1
  13   9   329372.80 5213.42   1
  13   9   4 789.462 464.101   1
  13   9   5 5007.23 1448.56   1
  13   9   6 1144.04 418.451   1
  13  11   013442.4013442.60   1
  14   0   0318884.019373.40   1
  14   0   1-79.0207 163.383   1
  14   0   266319.90 8888.03   1
  14   0   3 187.697 143.449   1
  14   0   4150864.0150864.0   1
  14   0   5-62.3809 283.438   1
  14   0   7-24.6916 33.7734   1
  14   0   858204.1058204.30   1
  14   0   9-114.744  116.98   1
  14   0  10 3001.15 3001.40   1
  14   0  11 697.761 698.695   1
  14   0  12 605.964  606.99   1
  14   2   063673.40 5794.89   1
  14   2   119657.60 4506.39   1
  14   2   2134564.021932.90   1
  14   2   333262.50 6224.87   1
  14   2   490079.90 6254.62   1
  14   2   5 1383.43 499.284   1
  14   2   665267.0065267.10   1
  14   2   719177.50 4996.77   1
  14   2   8 1991.90 858.183   1
  14   2   9 2310.18 989.056   1
  14   2  10 2764.02 1174.97   1
  14   2  11 1656.81 716.423   1
  14   2  12 3413.38 1441.74   1
  14   4   0113044.0 6240.33   1
  14   4   1 1215.12 423.241   1
  14   4   2145110.0 7082.12   1
  14   4   3 6611.73 2228.68   1
  14   4   4  432.47 192.018   1
  14   4   511005.90 3463.58   1
  14   4   6 9361.09 2952.84   1
  14   4   7 9629.97 2970.48   1
  14   4   8 97.5085   93.41   1
  14   4   9 311.191 166.887   1
  14   4  1030400.60 7856.92   1
  14   4  11 333.138 393.638   1
  14   6   0 4168.37 1163.69   1
  14   6   1 111.348 128.635   1
  14   6   2 3877.88 1636.27   1
  14   6   3 8843.83 3022.66   1
  14   6   421350.60 4885.94   1
  14   6   5 168.904  62.815   1
  14   6   634511.90 6495.02   1
  14   6   7 121.763 134.175   1
  14   6   814944.10 3753.62   1
  14   6   9 42.6575 45.3636   1
  14   6  10 8146.78 8146.87   1
  14   8   037323.10 5826.19   1
  14   8   1  123.13 211.799   1
  14   8   226891.20 5329.81   1
  14   8   3 543.252 304.678   1
  14   8   4 281.282 123.761   1
  14   8   5 216.143  141.85   1
  14   8   6 727.015 229.111   1
  14   8   7 154.939 252.418   1
  14  10   0 960.053  399.95   1
  14  10   1 20.8282 133.383   1
  14  10   2 3196.46 1110.34   1
  15   1   0115994.0 5734.60   1
  15   1   1139544.0 6457.17   1
  15   1   236032.10 7334.81   1
  15   1   334376.80 5730.77   1
  15   1   411101.50 3133.89   1
  15   1   535533.0035533.10   1
  15   1   641753.80 7045.67   1
  15   1   712732.70 4686.38   1
  15   1   818570.50 6168.82   1
  15   1   911140.50 4170.27   1
  15   1  1020428.70 6490.30   1
  15   1  1112254.20 4495.09   1
  15   3   0 3933.31 1295.28   1
  15   3   138196.50 6653.04   1
  15   3   2 9942.89 2808.89   1
  15   3   3 891.515 576.796   1
  15   3   413577.70 4999.70   1
  15   3   5 5727.22 1653.35   1
  15   3   6 14.1579 97.3712   1
  15   3   7 2691.92 936.891   1
  15   3   8 2032.28 873.016   1
  15   3   9 4416.37 1832.81   1
  15   3  1015937.20 5485.64   1
  15   3  11 6771.35 2719.98   1
  15   5   040938.90 5822.90   1
  15   5   113205.00 3516.22   1
  15   5   2 3273.34 1079.90   1
  15   5   3 3189.47 1132.49   1
  15   5   4 1218.94 476.917   1
  15   5   5 4424.44 1518.62   1
  15   5   626388.40 5265.35   1
  15   5   7 1342.84 465.426   1
  15   5   8 2123.14 612.133   1
  15   5   9 8347.23 2616.84   1
  15   7   0 3506.76 1039.35   1
  15   7   123715.50 4955.50   1
  15   7   2 6470.44 1849.13   1
  15   7   3 2936.62 842.666   1
  15   7   4  169.07 212.057   1
  15   7   513029.80 3355.87   1
  15   7   6 382.128 130.443   1
  15   7   713816.80 3448.26   1
  15   9   0 4793.89 1527.80   1
  15   9   1 8567.92 2492.14   1
  15   9   2 2859.86 945.125   1
  15   9   318964.70 4409.52   1
  16   0   0 5919.01 2486.80   1
  16   0   1 55.2053 169.522   1
  16   0   2138963.0 7846.71   1
  16   0   3 251.178 193.175   1
  16   0   4 2049.83 2050.18   1
  16   0   5 256.351 257.745   1
  16   0   6143628.0143628.0   1
  16   0   7-358.618 359.653   1
  16   0   8107750.0107750.0   1
  16   0   9 220.662 221.066   1
  16   0  1015953.1015953.80   1
  16   2   0 9549.77 5118.63   1
  16   2   1 69.2278 87.2351   1
  16   2   212210.70 3193.52   1
  16   2   3 101.362 33.3374   1
  16   2   411328.50 4290.37   1
  16   2   5 197.757 172.256   1
  16   2   6 1860.93 523.735   1
  16   2   7 8040.73 3162.15   1
  16   2   8 6048.93 2510.38   1
  16   2   9  137.90 134.786   1
  16   2  10 8601.69 3353.41   1
  16   4   056965.10 5951.36   1
  16   4   1 1147.15 401.669   1
  16   4   2 6463.48 6463.60   1
  16   4   3 1571.18  483.50   1
  16   4   444642.30 5910.15   1
  16   4   522282.50 5466.11   1
  16   4   6 6149.73 2076.77   1
  16   4   7 5684.20 1850.16   1
  16   4   8 2570.75 1116.36   1
  16   4   913164.50 4756.76   1
  16   6   013083.40 3953.11   1
  16   6   1 818.383 323.622   1
  16   6   2 2014.00 681.835   1
  16   6   3 3882.33 1191.10   1
  16   6   4 374.796 205.404   1
  16   6   5 3779.21 1252.99   1
  16   6   621812.00 5528.16   1
  16   6   7 2160.60 1341.67   1
  16   8   013285.10 3573.22   1
  16   8   116252.60 3946.34   1
  16   8   2 8872.16 2375.16   1
  16   8   3 5974.69 1718.94   1
  16   8   4 2099.66 729.182   1
  17   1   0 1216.92 390.915   1
  17   1   110171.20 3486.15   1
  17   1   2 385.521 133.189   1
  17   1   3 2658.71 899.992   1
  17   1   4 2756.95 867.621   1
  17   1   530614.80 8095.55   1
  17   1   6 3853.11 1612.83   1
  17   1   713482.90 4851.04   1
  17   1   840999.60 8060.46   1
  17   1   915209.50 5302.02   1
  17   3   0 489.197 155.394   1
  17   3   110678.20 3570.60   1
  17   3   234027.30 7216.87   1
  17   3   315880.00 4375.54   1
  17   3   4 4507.05 1583.35   1
  17   3   550581.90 6468.81   1
  17   3   6 1048.43 340.376   1
  17   3   730248.60 7841.13   1
  17   3   8 8478.26 3310.00   1
  17   5   010146.00 2955.06   1
  17   5   1 4447.56 1247.74   1
  17   5   229066.20 5317.38   1
  17   5   339026.50 6975.61   1
  17   5   4 4094.92 1439.96   1
  17   5   513981.10 3835.09   1
  17   5   6 8160.42 2442.97   1
  17   5   7 7477.84 2969.97   1
  17   7   0 4187.28 1859.83   1
  17   7   121782.90 4910.24   1
  17   7   2 186.633 204.665   1
  17   7   3 706.483 356.096   1
  17   7   4 3381.98 1032.08   1
  17   9   0 275.651 276.616   1
  18   0   091964.6091964.70   1
  18   0   1 10.5666 19.0317   1
  18   0   231280.3031280.40   1
  18   0   3 122.984 281.991   1
  18   0   463235.0063235.10   1
  18   0   5 213.523 214.428   1
  18   0   643394.0043394.10   1
  18   0   7 425.864 426.738   1
  18   0   811048.6011049.00   1
  18   2   0 329.968 131.566   1
  18   2   1 473.061 250.805   1
  18   2   2 708.678 309.041   1
  18   2   3 3004.42 1090.15   1
  18   2   441592.10 6945.67   1
  18   2   5 1766.27 761.974   1
  18   2   619336.70 6265.54   1
  18   2   715324.20 5331.00   1
  18   4   0 4046.78 1283.94   1
  18   4   1 2093.30 680.538   1
  18   4   234611.20 6087.47   1
  18   4   3 3864.27 1274.12   1
  18   4   455638.80 5131.28   1
  18   4   5 1543.90 592.463   1
  18   4   6 2174.74 790.847   1
  18   6   077438.50 6950.58   1
  18   6   1 6018.68 2025.55   1
  18   6   2 7127.19 1960.28   1
  18   6   3 6018.42 1657.10   1
  18   6   4 5733.23 1642.09   1
  18   8   017984.90 4253.59   1
  18   8   1 3399.22 3399.54   1
  19   1   0 9022.54 3520.13   1
  19   1   114956.00 3726.72   1
  19   1   2 306.744 224.607   1
  19   1   340720.10 6613.51   1
  19   1   4 151.995 67.5757   1
  19   1   5 8799.82 3414.73   1
  19   1   6 544.484 668.337   1
  19   3   055825.30 5724.52   1
  19   3   1 1287.13 365.296   1
  19   3   216695.80 4505.18   1
  19   3   329085.20 6506.37   1
  19   3   417157.20 4757.78   1
  19   3   525008.80 7228.09   1
  19   3   6-133.121 134.019   1
  19   5   013242.10 6429.72   1
  19   5   116574.10 3998.53   1
  19   5   2 2903.38  826.80   1
  19   5   316343.70 4870.73   1
  19   5   4 2217.79 955.252   1
  19   7   018880.80 5379.73   1
  19   7   1 4442.88 1851.32   1
  20   0   093231.30 5146.62   1
  20   0   1 192.354 365.025   1
  20   0   263864.0063864.10   1
  20   0   3-142.047  144.27   1
  20   0   423497.5023497.60   1
  20   0   5 186.743 187.304   1
  20   2   0 9764.33 2962.19   1
  20   2   1 446.136 147.155   1
  20   2   221523.40 5412.52   1
  20   2   311518.70 3583.03   1
  20   2   427445.60 7530.63   1
  20   2   5-21.0288 33.9767   1
  20   4   0 7527.75 2369.56   1
  20   4   1 7732.36 2538.58   1
  20   4   212860.30 3621.50   1
  20   4   3 1755.78 617.145   1
  20   6   0 9182.97 3125.55   1
  20   6   1 3360.71 1095.99   1
  21   1   0 2121.61 721.888   1
  21   1   116133.00 4396.62   1
  21   1   2 5648.85 2303.45   1
  21   1   312545.60 4580.61   1
  21   3   0 53.9709 428.815   1
  21   3   1 6199.67 2180.53   1
  21   3   2 4115.63 1419.71   1
  21   3   327061.3027061.40   1
  21   5   0 743.808 602.803   1
  22   0   013318.5013319.30   1
  22   0   1 233.185 233.814   1
  22   0   218555.9018556.30   1
  22   2   0 7726.60 2421.26   1
  22   2   1-72.2287 239.904   1
  22   4   0 703.869 704.173   1
  23   1   0 335.898 336.963   1
   0   0   0    0.00    0.00   1
;
_shelx_hkl_checksum   74703
